# Supplementary material for: Use of artificial intelligence chatbots in clinical management of immune-related adverse events
Source: PubMed Central journal article supplement — J Immunother Cancer. 2024 May 30;12(5):e008599. doi: 10.1136/jitc-2023-008599 (PMC11141185; doi:10.1136/jitc-2023-008599), 2024-05-30
Supplement: jitc-2023-008599supp001.pdf [file jitc-2023-008599supp001.pdf]

**Supplementary Table 1**

**Engine 1**

|                           | ICI - general                                                                                                                                                                                                                                                                                                                                                                                                                                                                                                                                                                                                                                                                                                                                                                                                                                                                                                                                                                                                                                                                                                                                                                                                                                                                                                                                                                                                                                                        | ICI - general                                                                                                                                                                                                                                                                                                                                                                                                                                                                                                                                                                                                                                                                                                                                                                                                                                                                                                                                                                                                                                                                                                                                                                                                                                                                                                                                                                                                                                                                                                                         | ICI - general                                                                                                                                                                                                                                                                                                                                                                                                                                                                                                                                                                                                                                                                                                                                                                                                                                                                                                                                                                                                                                                                                                                                                                                                                                                                                                                                                                                                                                                                                                                                                                                                                                                                                                                                                                                                                                                                                                      | ICI - general                                                                                                                                                                                                                                                                                                                                                                                                                                                                                                                                                                                                                                                                                                                                                                                                                                                                                                                                                                                                                                                                                                                                                                                                                                                                                                                                                                                                                                                                                                                                                                                                                                                                                                                                                                                                                                                                                                          | ICI - general                                                                                                                                                                                                                                                                                                                                                                                                                                                                                                                                                                                                                                                                                                                                                                                                                                                                                                                                                                                                                                                                                                                                                                                                                                                                                                                                                                                                                                                                                                                                                                                                                                                                                                                                                                                                                                                                                                                                                                                                                                                                                                                                                             |
|---------------------------|----------------------------------------------------------------------------------------------------------------------------------------------------------------------------------------------------------------------------------------------------------------------------------------------------------------------------------------------------------------------------------------------------------------------------------------------------------------------------------------------------------------------------------------------------------------------------------------------------------------------------------------------------------------------------------------------------------------------------------------------------------------------------------------------------------------------------------------------------------------------------------------------------------------------------------------------------------------------------------------------------------------------------------------------------------------------------------------------------------------------------------------------------------------------------------------------------------------------------------------------------------------------------------------------------------------------------------------------------------------------------------------------------------------------------------------------------------------------|---------------------------------------------------------------------------------------------------------------------------------------------------------------------------------------------------------------------------------------------------------------------------------------------------------------------------------------------------------------------------------------------------------------------------------------------------------------------------------------------------------------------------------------------------------------------------------------------------------------------------------------------------------------------------------------------------------------------------------------------------------------------------------------------------------------------------------------------------------------------------------------------------------------------------------------------------------------------------------------------------------------------------------------------------------------------------------------------------------------------------------------------------------------------------------------------------------------------------------------------------------------------------------------------------------------------------------------------------------------------------------------------------------------------------------------------------------------------------------------------------------------------------------------|--------------------------------------------------------------------------------------------------------------------------------------------------------------------------------------------------------------------------------------------------------------------------------------------------------------------------------------------------------------------------------------------------------------------------------------------------------------------------------------------------------------------------------------------------------------------------------------------------------------------------------------------------------------------------------------------------------------------------------------------------------------------------------------------------------------------------------------------------------------------------------------------------------------------------------------------------------------------------------------------------------------------------------------------------------------------------------------------------------------------------------------------------------------------------------------------------------------------------------------------------------------------------------------------------------------------------------------------------------------------------------------------------------------------------------------------------------------------------------------------------------------------------------------------------------------------------------------------------------------------------------------------------------------------------------------------------------------------------------------------------------------------------------------------------------------------------------------------------------------------------------------------------------------------|------------------------------------------------------------------------------------------------------------------------------------------------------------------------------------------------------------------------------------------------------------------------------------------------------------------------------------------------------------------------------------------------------------------------------------------------------------------------------------------------------------------------------------------------------------------------------------------------------------------------------------------------------------------------------------------------------------------------------------------------------------------------------------------------------------------------------------------------------------------------------------------------------------------------------------------------------------------------------------------------------------------------------------------------------------------------------------------------------------------------------------------------------------------------------------------------------------------------------------------------------------------------------------------------------------------------------------------------------------------------------------------------------------------------------------------------------------------------------------------------------------------------------------------------------------------------------------------------------------------------------------------------------------------------------------------------------------------------------------------------------------------------------------------------------------------------------------------------------------------------------------------------------------------------|---------------------------------------------------------------------------------------------------------------------------------------------------------------------------------------------------------------------------------------------------------------------------------------------------------------------------------------------------------------------------------------------------------------------------------------------------------------------------------------------------------------------------------------------------------------------------------------------------------------------------------------------------------------------------------------------------------------------------------------------------------------------------------------------------------------------------------------------------------------------------------------------------------------------------------------------------------------------------------------------------------------------------------------------------------------------------------------------------------------------------------------------------------------------------------------------------------------------------------------------------------------------------------------------------------------------------------------------------------------------------------------------------------------------------------------------------------------------------------------------------------------------------------------------------------------------------------------------------------------------------------------------------------------------------------------------------------------------------------------------------------------------------------------------------------------------------------------------------------------------------------------------------------------------------------------------------------------------------------------------------------------------------------------------------------------------------------------------------------------------------------------------------------------------------|
| Question                  | Which patient populations should not receive immune checkpoint inhibitors?                                                                                                                                                                                                                                                                                                                                                                                                                                                                                                                                                                                                                                                                                                                                                                                                                                                                                                                                                                                                                                                                                                                                                                                                                                                                                                                                                                                           | What are the main treatments for grade 3 or higher immune checkpoint inhibitor toxicities? Please include dose and duration of any medications                                                                                                                                                                                                                                                                                                                                                                                                                                                                                                                                                                                                                                                                                                                                                                                                                                                                                                                                                                                                                                                                                                                                                                                                                                                                                                                                                                                        | What are the major complications of high dose steroids?                                                                                                                                                                                                                                                                                                                                                                                                                                                                                                                                                                                                                                                                                                                                                                                                                                                                                                                                                                                                                                                                                                                                                                                                                                                                                                                                                                                                                                                                                                                                                                                                                                                                                                                                                                                                                                                            | What surveillance labs should be obtained in all patients treated with immune checkpoint inhibitors?                                                                                                                                                                                                                                                                                                                                                                                                                                                                                                                                                                                                                                                                                                                                                                                                                                                                                                                                                                                                                                                                                                                                                                                                                                                                                                                                                                                                                                                                                                                                                                                                                                                                                                                                                                                                                   | What are the risks of using combination immune checkpoint inhibition compared with anti-PD-1 monotherapy?                                                                                                                                                                                                                                                                                                                                                                                                                                                                                                                                                                                                                                                                                                                                                                                                                                                                                                                                                                                                                                                                                                                                                                                                                                                                                                                                                                                                                                                                                                                                                                                                                                                                                                                                                                                                                                                                                                                                                                                                                                                                 |
| Answer Engine 1 (ChatGPT) | <p>Immune checkpoint inhibitors (ICIs) are a class of drugs that have revolutionized cancer therapy by unleashing the body's immune system to attack tumor cells. However, there are certain patient populations in which the use of ICIs may be contraindicated or used with caution:</p> <p>Patients with autoimmune diseases: Patients with pre-existing autoimmune conditions might experience a flare of their disease or develop new autoimmune side effects when treated with ICIs.</p> <p>Patients with a history of organ transplantation: ICIs might increase the risk of graft rejection due to enhanced immune activation.</p> <p>Patients with certain neurological disorders: There's a risk of exacerbating conditions like multiple sclerosis or myasthenia gravis.</p> <p>Patients with certain cardiovascular conditions: ICIs may exacerbate some heart conditions, especially those with a history of myocarditis.</p> <p>Patients with untreated or active brain metastases: There is a concern about potential exacerbation of neurological symptoms, although newer data suggest that some of these patients may still benefit.</p> <p>Patients with severe or life-threatening immune-related adverse events (irAEs) from prior ICI therapy: If a patient has previously experienced severe side effects from ICIs, it might be risky to use them again.</p> <p>Pregnant or breastfeeding women: The safety of ICIs during pregnancy and</p> | <p>Management of grade 3 or higher immune checkpoint inhibitor (ICI) toxicities requires swift recognition and intervention. Here's a generalized approach for managing some of the most common severe ICI-induced toxicities:</p> <p>1. ICI-Induced Colitis:</p> <p>Immediate Management: Hold or discontinue the ICI.</p> <p>First-Line Therapy:</p> <p>High-dose corticosteroids: Oral or intravenous (IV) methylprednisolone (or its equivalent) at 1-2 mg/kg/day. Once symptoms improve to grade 1 or less, taper the steroids over 4-6 weeks.</p> <p>Second-Line Therapy (if no improvement after 3-5 days of corticosteroids or if recurrent symptoms during taper):</p> <p>Infliximab: 5 mg/kg IV, can be repeated once after 2 weeks if no response.</p> <p>2. ICI-Induced Hepatitis:</p> <p>Immediate Management: Hold or discontinue the ICI.</p> <p>First-Line Therapy:</p> <p>High-dose corticosteroids: Oral or IV methylprednisolone (or its equivalent) at 1-2 mg/kg/day. Once liver enzymes improve and stabilize, taper the steroids over 4-6 weeks.</p> <p>Second-Line Therapy (if no improvement after 3-5 days of corticosteroids or if recurrent symptoms during taper):</p> <p>Mycophenolate mofetil or infliximab can be considered, but consult hepatology.</p> <p>3. Other toxicities (e.g., pneumonitis, dermatitis, endocrinopathies, nephritis, etc.):</p> <p>For most other grade 3 or higher ICI toxicities, the general approach involves: Holding or discontinuing the ICI. Initiating high-dose</p> | <p>High-dose corticosteroids, while therapeutically effective for many conditions, come with a range of potential complications. Here are some major complications associated with high-dose corticosteroid use:</p> <p>1. <b>**Endocrine/Metabolic Complications**</b>:</p> <ul style="list-style-type: none"> <li>- <b>**Hyperglycemia and Diabetes Mellitus**</b>: Steroids increase blood glucose levels and can precipitate diabetes or worsen pre-existing diabetes.</li> <li>- <b>**Osteoporosis and Bone Fractures**</b>: Chronic steroid use can lead to decreased bone density.</li> <li>- <b>**Adrenal Suppression**</b>: Chronic use can suppress the body's own production of cortisol, leading to adrenal insufficiency when the steroids are tapered or discontinued.</li> </ul> <p>2. <b>**Cardiovascular Complications**</b>:</p> <ul style="list-style-type: none"> <li>- <b>**Hypertension**</b>: Elevated blood pressure.</li> <li>- <b>**Fluid Retention**</b>: Leading to edema or swelling.</li> <li>- <b>**Dyslipidemia**</b>: Altered blood lipid levels, potentially increasing the risk of atherosclerosis and cardiovascular diseases.</li> </ul> <p>3. <b>**Gastrointestinal Complications**</b>:</p> <ul style="list-style-type: none"> <li>- <b>**Peptic Ulcer Disease**</b>: Increased risk of gastric or duodenal ulcers.</li> <li>- <b>**Pancreatitis**</b>: Inflammation of the pancreas.</li> </ul> <p>4. <b>**Neuropsychiatric Complications**</b>:</p> <ul style="list-style-type: none"> <li>- <b>**Mood Changes**</b>: Including depression, euphoria, irritability, or psychosis.</li> <li>- <b>**Insomnia**</b>: Difficulty sleeping.</li> </ul> <p>5. <b>**Immunologic Complications**</b>:</p> <ul style="list-style-type: none"> <li>- <b>**Immunosuppression**</b>: Increased susceptibility to infections.</li> <li>- <b>**Impaired Wound Healing**</b>.</li> </ul> | <p>Surveillance labs for patients treated with immune checkpoint inhibitors (ICIs) are essential to monitor for potential toxicities, especially immune-related adverse events (irAEs). The specific labs you should obtain might vary based on the particular ICI and the clinical context, but here's a general list of labs that are frequently monitored:</p> <p>1. <b>**Complete Blood Count (CBC) with differential**</b>:</p> <ul style="list-style-type: none"> <li>- To assess for anemia, thrombocytopenia, or neutropenia, which can occasionally occur with ICIs.</li> </ul> <p>2. <b>**Comprehensive Metabolic Panel (CMP)**</b>:</p> <ul style="list-style-type: none"> <li>- <b>**Electrolytes**</b>: For detecting any imbalances.</li> <li>- <b>**Liver function tests (LFTs)**</b>: Alanine aminotransferase (ALT), aspartate aminotransferase (AST), alkaline phosphatase (ALP), and bilirubin are monitored to detect hepatotoxicity, which is a potential side effect of ICIs.</li> <li>- <b>**Renal function**</b>: Blood urea nitrogen (BUN) and creatinine to monitor for nephrotoxicity or nephritis.</li> <li>- <b>**Glucose**</b>: As ICIs can cause endocrinopathies, including diabetes.</li> </ul> <p>3. <b>**Thyroid function tests**</b>:</p> <ul style="list-style-type: none"> <li>- Thyroid-stimulating hormone (TSH) and free thyroxine (T4) levels to monitor for thyroid dysfunction, as ICIs can induce both hypo- and hyperthyroidism.</li> </ul> <p>4. <b>**Adrenal function tests**</b>:</p> <ul style="list-style-type: none"> <li>- Cortisol and ACTH levels if there's clinical suspicion of adrenal insufficiency.</li> </ul> <p>5. <b>**Other endocrine tests**</b>:</p> <ul style="list-style-type: none"> <li>- Depending on symptoms, you might consider tests for pituitary function (like LH, FSH, and prolactin) or for diabetes insipidus (like serum</li> </ul> | <p>Combination immune checkpoint inhibition typically refers to the use of two immune checkpoint inhibitors simultaneously, often an anti-CTLA-4 agent (like ipilimumab) and an anti-PD-1/PD-L1 agent (like nivolumab or pembrolizumab). While combination therapy can offer increased efficacy in some cancers compared to anti-PD-1 monotherapy, it also comes with a heightened risk of adverse events. Here are the main risks associated with combination checkpoint inhibition compared to anti-PD-1 monotherapy:</p> <p>1. <b>**Increased Immune-Related Adverse Events (irAEs)**</b>:</p> <ul style="list-style-type: none"> <li>- Combination therapy substantially increases the risk of irAEs. These can affect virtually any organ system, including the skin (rash, pruritus), gastrointestinal tract (colitis, hepatitis), endocrine glands (thyroiditis, hypophysitis, adrenalitis), lungs (pneumonitis), heart (myocarditis), kidneys (nephritis), and more.</li> </ul> <p>2. <b>**Severity of irAEs**</b>:</p> <ul style="list-style-type: none"> <li>- Not only is the incidence of irAEs higher with combination therapy, but the severity of these events is also often greater. Grade 3 and 4 adverse events (which are severe to life-threatening) are more common with combination therapy.</li> </ul> <p>3. <b>**Early Discontinuation of Treatment**</b>:</p> <ul style="list-style-type: none"> <li>- Due to the higher risk and severity of adverse events, patients on combination therapy may have to discontinue treatment earlier than if they were on monotherapy.</li> </ul> <p>4. <b>**Increased Need for Immunosuppression**</b>:</p> <ul style="list-style-type: none"> <li>- The management of severe irAEs often requires high-dose corticosteroids and, in some cases, other immunosuppressive agents. The need for these agents is higher with combination therapy compared to monotherapy.</li> </ul> <p>5. <b>**Hospitalization and Mortality**</b>:</p> <ul style="list-style-type: none"> <li>- There's a higher rate of hospitalization due to irAEs with combination therapy. In rare cases, irAEs can be fatal.</li> </ul> |

|                                                                                                                                                                                                                                                                                                                                                                                                                                                                                                                                                                                               |                                                                                                                                                                                                                                                                                                                                                                                                                                                                                                                                                                                                                                                                                          |                                                                                                                                                                                                                                                                                                                                                                                                                                                                                                                                                                                                                                                                                                                                                                                                                                                                                                                                                                                                                                                                                                                                                                                                                                                                                                                                                 |                                                                                                                                                                                                                                                                                                                                                                                                                                                                                                                                                                                                                                                                                                                                                                                                                                                                                                                                                                                       |                                                                                                                                                                                                                                                                                                                                                                                                                                                                                                                                                                                                                                                                                                                                                                                                                                                                                                                                                                     |
|-----------------------------------------------------------------------------------------------------------------------------------------------------------------------------------------------------------------------------------------------------------------------------------------------------------------------------------------------------------------------------------------------------------------------------------------------------------------------------------------------------------------------------------------------------------------------------------------------|------------------------------------------------------------------------------------------------------------------------------------------------------------------------------------------------------------------------------------------------------------------------------------------------------------------------------------------------------------------------------------------------------------------------------------------------------------------------------------------------------------------------------------------------------------------------------------------------------------------------------------------------------------------------------------------|-------------------------------------------------------------------------------------------------------------------------------------------------------------------------------------------------------------------------------------------------------------------------------------------------------------------------------------------------------------------------------------------------------------------------------------------------------------------------------------------------------------------------------------------------------------------------------------------------------------------------------------------------------------------------------------------------------------------------------------------------------------------------------------------------------------------------------------------------------------------------------------------------------------------------------------------------------------------------------------------------------------------------------------------------------------------------------------------------------------------------------------------------------------------------------------------------------------------------------------------------------------------------------------------------------------------------------------------------|---------------------------------------------------------------------------------------------------------------------------------------------------------------------------------------------------------------------------------------------------------------------------------------------------------------------------------------------------------------------------------------------------------------------------------------------------------------------------------------------------------------------------------------------------------------------------------------------------------------------------------------------------------------------------------------------------------------------------------------------------------------------------------------------------------------------------------------------------------------------------------------------------------------------------------------------------------------------------------------|---------------------------------------------------------------------------------------------------------------------------------------------------------------------------------------------------------------------------------------------------------------------------------------------------------------------------------------------------------------------------------------------------------------------------------------------------------------------------------------------------------------------------------------------------------------------------------------------------------------------------------------------------------------------------------------------------------------------------------------------------------------------------------------------------------------------------------------------------------------------------------------------------------------------------------------------------------------------|
| <p>lactation has not been well-studied, and there's potential risk to the fetus or infant.</p> <p>It's essential to note that the decision to use ICIs should be individualized, taking into account the potential benefits and risks for each patient. In some cases, even if a patient has a contraindication, the potential benefits of the therapy might outweigh the risks, especially if other treatments are not available or have failed.</p> <p>Always consult with an oncologist or specialist when considering the use of immune checkpoint inhibitors for a specific patient.</p> | <p>corticosteroids (1-2 mg/kg/day of methylprednisolone or its equivalent) and then tapering over weeks based on clinical response. Considering additional immunosuppressive agents for refractory cases. Close monitoring of the patient and consultation with specialists (e.g., gastroenterology for colitis, hepatology for hepatitis) are crucial. It's also essential to rule out other potential causes of the symptoms, such as infections.</p> <p>Note: These are general guidelines, and clinical decisions should be individualized for each patient. Always consult the latest clinical guidelines and discuss with appropriate specialists before initiating treatment.</p> | <p>6. <b>**Ophthalmologic Complications**</b>:<br/> - <b>**Cataract Formation**</b>: Especially posterior subcapsular cataracts.<br/> - <b>**Glaucoma**</b>: Elevated intraocular pressure.</p> <p>7. <b>**Musculoskeletal Complications**</b>:<br/> - <b>**Myopathy**</b>: Weakness and muscle wasting.<br/> - <b>**Avascular Necrosis**</b>: Particularly of the femoral and humeral heads.</p> <p>8. <b>**Dermatologic Complications**</b>:<br/> - <b>**Skin Thinning**</b>.<br/> - <b>**Easy Bruising**</b>.<br/> - <b>**Striae**</b> (stretch marks).<br/> - <b>**Acne**</b>.</p> <p>9. <b>**Electrolyte Disturbances**</b>:<br/> - <b>**Hypokalemia**</b>: Low potassium levels.<br/> - <b>**Hypocalcemia**</b>: Low calcium levels.</p> <p>10. <b>**Weight Gain and Fat Redistribution**</b>: Leading to the characteristic "moon face", dorsal cervical fat pad ("buffalo hump"), and central obesity.</p> <p>11. <b>**Growth Retardation**</b>: In children, chronic use can lead to reduced growth.</p> <p>It's worth noting that the risk of these complications depends on the dose of the corticosteroid, the duration of therapy, and the specific corticosteroid used. Monitoring for these complications is essential, and whenever possible, the lowest effective dose should be used for the shortest duration necessary.</p> | <p>osmolality and urine specific gravity).</p> <p>6. <b>**Muscle enzymes**</b>:<br/> - Creatine kinase (CK) if there's concern for myositis.</p> <p>7. <b>**Inflammatory markers**</b>:<br/> - Such as C-reactive protein (CRP) or erythrocyte sedimentation rate (ESR) if there's concern for inflammatory conditions like colitis.</p> <p>8. <b>**Urinalysis**</b>:<br/> - To monitor for proteinuria, which could indicate nephritis.</p> <p>The frequency of surveillance will depend on multiple factors, including the specific ICI being used, the phase of treatment (induction vs. maintenance), and whether the patient has had prior irAEs. Initially, labs might be drawn more frequently (e.g., before each infusion) and then less frequently as the treatment course progresses and if the patient remains stable.</p> <p>It's essential to tailor the surveillance approach to each patient and to always consult current guidelines and clinical best practices.</p> | <p>6. <b>**Economic Costs**</b>:<br/> - Using two agents is generally more expensive than one, leading to higher direct costs of treatment.</p> <p>7. <b>**Potential Drug-Drug Interactions**</b>:<br/> - Combining therapies may raise the potential for drug-drug interactions, although this is less of a concern with the checkpoint inhibitors used in combination, as they have different targets.</p> <p>It's important to note that while the risks with combination therapy are higher, the potential benefits, in terms of tumor response and overall survival, can also be greater in certain cancers and patient populations. The decision to use monotherapy versus combination therapy should be based on a thorough assessment of the potential benefits and risks for each patient, the specific type and stage of cancer, and other individual factors. Always consult current clinical guidelines and trials when making treatment decisions.</p> |
|-----------------------------------------------------------------------------------------------------------------------------------------------------------------------------------------------------------------------------------------------------------------------------------------------------------------------------------------------------------------------------------------------------------------------------------------------------------------------------------------------------------------------------------------------------------------------------------------------|------------------------------------------------------------------------------------------------------------------------------------------------------------------------------------------------------------------------------------------------------------------------------------------------------------------------------------------------------------------------------------------------------------------------------------------------------------------------------------------------------------------------------------------------------------------------------------------------------------------------------------------------------------------------------------------|-------------------------------------------------------------------------------------------------------------------------------------------------------------------------------------------------------------------------------------------------------------------------------------------------------------------------------------------------------------------------------------------------------------------------------------------------------------------------------------------------------------------------------------------------------------------------------------------------------------------------------------------------------------------------------------------------------------------------------------------------------------------------------------------------------------------------------------------------------------------------------------------------------------------------------------------------------------------------------------------------------------------------------------------------------------------------------------------------------------------------------------------------------------------------------------------------------------------------------------------------------------------------------------------------------------------------------------------------|---------------------------------------------------------------------------------------------------------------------------------------------------------------------------------------------------------------------------------------------------------------------------------------------------------------------------------------------------------------------------------------------------------------------------------------------------------------------------------------------------------------------------------------------------------------------------------------------------------------------------------------------------------------------------------------------------------------------------------------------------------------------------------------------------------------------------------------------------------------------------------------------------------------------------------------------------------------------------------------|---------------------------------------------------------------------------------------------------------------------------------------------------------------------------------------------------------------------------------------------------------------------------------------------------------------------------------------------------------------------------------------------------------------------------------------------------------------------------------------------------------------------------------------------------------------------------------------------------------------------------------------------------------------------------------------------------------------------------------------------------------------------------------------------------------------------------------------------------------------------------------------------------------------------------------------------------------------------|

|                           | Colitis                                                                                                                                                                                                                                                                                                                                                                                                                                                                                                                                                                                                                                                                                                                                                                                                                                                                                                                                                                                                                                                                                                                                                                                                                                                                                                                                                                                                                                                                                                                                                                                                                                                                                                                                                                                                                                                                                            | Colitis                                                                                                                                                                                                                                                                                                                                                                                                                                                                                                                                                                                                                                                                                                                                                                                                                                                                                                                                                                                                                                                                                                                                                                                                                                                                                                                                                                                                                                                                                                                                                                                                                                                                                                                                                                                                                                                                                                                                                                                | Colitis                                                                                                                                                                                                                                                                                                                                                                                                                                                                                                                                                                                                                                                                                                                                                                                                                                                                                                                                                                                                                                                                                                                                                                                                                                                                                                                                                                                                                                                                                                                                                                                                                                                                                                                                                                                                                                                                                                                                                                                      | Colitis                                                                                                                                                                                                                                                                                                                                                                                                                                                                                                                                                                                                                                                                                                                                                                                                                                                                                                                                                                                                                                                                                                                                                                                                                                                                                                                                                                                                                                                                                                                                                                                                                                                                                 | Colitis                                                                                                                                                                                                                                                                                                                                                                                                                                                                                                                                                                                                                                                                                                                                                                                                                                                                                                                                                                                                                                                                                                                                                                                                                                                                                                                                                                                                                                                                                                                                                                                                                                                                                                                                                                                                                                                                                                                                                                                                                                                                                                                                                                                                                                                                                                                                               |
|---------------------------|----------------------------------------------------------------------------------------------------------------------------------------------------------------------------------------------------------------------------------------------------------------------------------------------------------------------------------------------------------------------------------------------------------------------------------------------------------------------------------------------------------------------------------------------------------------------------------------------------------------------------------------------------------------------------------------------------------------------------------------------------------------------------------------------------------------------------------------------------------------------------------------------------------------------------------------------------------------------------------------------------------------------------------------------------------------------------------------------------------------------------------------------------------------------------------------------------------------------------------------------------------------------------------------------------------------------------------------------------------------------------------------------------------------------------------------------------------------------------------------------------------------------------------------------------------------------------------------------------------------------------------------------------------------------------------------------------------------------------------------------------------------------------------------------------------------------------------------------------------------------------------------------------|----------------------------------------------------------------------------------------------------------------------------------------------------------------------------------------------------------------------------------------------------------------------------------------------------------------------------------------------------------------------------------------------------------------------------------------------------------------------------------------------------------------------------------------------------------------------------------------------------------------------------------------------------------------------------------------------------------------------------------------------------------------------------------------------------------------------------------------------------------------------------------------------------------------------------------------------------------------------------------------------------------------------------------------------------------------------------------------------------------------------------------------------------------------------------------------------------------------------------------------------------------------------------------------------------------------------------------------------------------------------------------------------------------------------------------------------------------------------------------------------------------------------------------------------------------------------------------------------------------------------------------------------------------------------------------------------------------------------------------------------------------------------------------------------------------------------------------------------------------------------------------------------------------------------------------------------------------------------------------------|----------------------------------------------------------------------------------------------------------------------------------------------------------------------------------------------------------------------------------------------------------------------------------------------------------------------------------------------------------------------------------------------------------------------------------------------------------------------------------------------------------------------------------------------------------------------------------------------------------------------------------------------------------------------------------------------------------------------------------------------------------------------------------------------------------------------------------------------------------------------------------------------------------------------------------------------------------------------------------------------------------------------------------------------------------------------------------------------------------------------------------------------------------------------------------------------------------------------------------------------------------------------------------------------------------------------------------------------------------------------------------------------------------------------------------------------------------------------------------------------------------------------------------------------------------------------------------------------------------------------------------------------------------------------------------------------------------------------------------------------------------------------------------------------------------------------------------------------------------------------------------------------------------------------------------------------------------------------------------------------|-----------------------------------------------------------------------------------------------------------------------------------------------------------------------------------------------------------------------------------------------------------------------------------------------------------------------------------------------------------------------------------------------------------------------------------------------------------------------------------------------------------------------------------------------------------------------------------------------------------------------------------------------------------------------------------------------------------------------------------------------------------------------------------------------------------------------------------------------------------------------------------------------------------------------------------------------------------------------------------------------------------------------------------------------------------------------------------------------------------------------------------------------------------------------------------------------------------------------------------------------------------------------------------------------------------------------------------------------------------------------------------------------------------------------------------------------------------------------------------------------------------------------------------------------------------------------------------------------------------------------------------------------------------------------------------------|-------------------------------------------------------------------------------------------------------------------------------------------------------------------------------------------------------------------------------------------------------------------------------------------------------------------------------------------------------------------------------------------------------------------------------------------------------------------------------------------------------------------------------------------------------------------------------------------------------------------------------------------------------------------------------------------------------------------------------------------------------------------------------------------------------------------------------------------------------------------------------------------------------------------------------------------------------------------------------------------------------------------------------------------------------------------------------------------------------------------------------------------------------------------------------------------------------------------------------------------------------------------------------------------------------------------------------------------------------------------------------------------------------------------------------------------------------------------------------------------------------------------------------------------------------------------------------------------------------------------------------------------------------------------------------------------------------------------------------------------------------------------------------------------------------------------------------------------------------------------------------------------------------------------------------------------------------------------------------------------------------------------------------------------------------------------------------------------------------------------------------------------------------------------------------------------------------------------------------------------------------------------------------------------------------------------------------------------------------|
| Question                  | What is the primary diagnostic workup for suspected immune checkpoint inhibitor colitis?                                                                                                                                                                                                                                                                                                                                                                                                                                                                                                                                                                                                                                                                                                                                                                                                                                                                                                                                                                                                                                                                                                                                                                                                                                                                                                                                                                                                                                                                                                                                                                                                                                                                                                                                                                                                           | What are other conditions in the differential diagnosis when considering immune checkpoint inhibitor associated colitis?                                                                                                                                                                                                                                                                                                                                                                                                                                                                                                                                                                                                                                                                                                                                                                                                                                                                                                                                                                                                                                                                                                                                                                                                                                                                                                                                                                                                                                                                                                                                                                                                                                                                                                                                                                                                                                                               | Are there any situations where immune checkpoint inhibitors can be continued even if colitis is suspected?                                                                                                                                                                                                                                                                                                                                                                                                                                                                                                                                                                                                                                                                                                                                                                                                                                                                                                                                                                                                                                                                                                                                                                                                                                                                                                                                                                                                                                                                                                                                                                                                                                                                                                                                                                                                                                                                                   | What are the diagnostic criteria for grade 3 colitis or diarrhea from immune checkpoint inhibitors?                                                                                                                                                                                                                                                                                                                                                                                                                                                                                                                                                                                                                                                                                                                                                                                                                                                                                                                                                                                                                                                                                                                                                                                                                                                                                                                                                                                                                                                                                                                                                                                     | What are the primary treatments for immune checkpoint inhibitor-associated colitis that does not respond to high-dose steroids?                                                                                                                                                                                                                                                                                                                                                                                                                                                                                                                                                                                                                                                                                                                                                                                                                                                                                                                                                                                                                                                                                                                                                                                                                                                                                                                                                                                                                                                                                                                                                                                                                                                                                                                                                                                                                                                                                                                                                                                                                                                                                                                                                                                                                       |
| Answer Engine 1 (ChatGPT) | <p>Immune checkpoint inhibitor (ICI) colitis is an immune-related adverse event (irAE) resulting from the use of ICIs. If ICI colitis is suspected, prompt evaluation is crucial to ensure accurate diagnosis and management. Here's a general approach to the diagnostic workup:</p> <ol style="list-style-type: none"> <li><b>Clinical Assessment</b>: Begin by taking a thorough history and performing a physical examination. <ul style="list-style-type: none"> <li><b>Symptoms</b>: Assess the onset, duration, and progression of diarrhea, abdominal pain, mucus or blood in stool, urgency, or tenesmus.</li> <li><b>Medication review</b>: Ensure that the symptoms are not due to other medications (e.g., antibiotics, NSAIDs).</li> <li><b>Physical Examination</b>: Check for signs of dehydration, abdominal tenderness, or peritoneal signs.</li> </ul> </li> <li><b>Laboratory Tests</b>: <ul style="list-style-type: none"> <li><b>Complete Blood Count (CBC)</b>: To assess for anemia, infection, or other abnormalities.</li> <li><b>Comprehensive Metabolic Panel (CMP)</b>: To check liver and kidney function, which can be impacted by dehydration or other irAEs.</li> <li><b>Inflammatory markers</b>: C-reactive protein (CRP) and erythrocyte sedimentation rate (ESR) to gauge the level of inflammation.</li> <li><b>Stool Studies</b>: To rule out infectious causes. Include tests for pathogens like <i>Clostridium difficile</i>, <i>Salmonella</i>, <i>Shigella</i>, <i>Campylobacter</i>, and common parasites. Also, consider testing for ova and parasites.</li> </ul> </li> <li><b>Imaging</b>: <ul style="list-style-type: none"> <li><b>Abdominal X-ray</b>: Useful to rule out bowel obstruction or perforation, particularly if the patient has severe symptoms.</li> <li><b>CT Scan</b>: It may be considered in severe cases</li> </ul> </li> </ol> | <p>When evaluating a patient for suspected immune checkpoint inhibitor (ICI) associated colitis, it's important to consider other conditions that can present with similar gastrointestinal symptoms. Here's a list of differential diagnoses to consider:</p> <ol style="list-style-type: none"> <li><b>Infectious Colitis</b>: <ul style="list-style-type: none"> <li><b>Clostridium difficile colitis</b>: Especially relevant in hospitalized patients or those recently on antibiotics.</li> <li><b>Other bacterial infections</b>: Such as those caused by <i>Salmonella</i>, <i>Shigella</i>, <i>Campylobacter</i>, <i>Escherichia coli</i> (E. coli), and <i>Yersinia</i>.</li> <li><b>Viral infections</b>: Including cytomegalovirus (CMV) or norovirus.</li> <li><b>Parasitic infections</b>: Such as <i>Entamoeba histolytica</i> or <i>Giardia</i>.</li> </ul> </li> <li><b>Inflammatory Bowel Disease (IBD)</b>: <ul style="list-style-type: none"> <li><b>Ulcerative colitis</b>: A chronic inflammatory condition of the colon.</li> <li><b>Crohn's disease</b>: Can affect any part of the gastrointestinal tract.</li> </ul> </li> <li><b>Ischemic Colitis</b>: Caused by reduced blood flow to the colon, often presenting with bloody diarrhea.</li> <li><b>Radiation Colitis</b>: In patients with a history of radiation therapy to the pelvic area.</li> <li><b>Drug-induced Colitis</b>: Other than ICIs, several medications can induce colitis, such as: <ul style="list-style-type: none"> <li>Nonsteroidal anti-inflammatory drugs (NSAIDs)</li> <li>Antibiotics</li> <li>Immunosuppressive agents</li> <li>Chemotherapy agents</li> </ul> </li> <li><b>Diversion Colitis</b>: Inflammation of a segment of the large intestine that has been surgically diverted and is no longer in contact with the fecal stream.</li> <li><b>Microscopic Colitis</b>: Includes collagenous colitis and lymphocytic colitis, both of which can cause chronic</li> </ol> | <p>The decision to continue or withhold immune checkpoint inhibitors (ICIs) when colitis is suspected depends on the severity of the colitis, the overall clinical context, and the potential risks and benefits of continuing therapy. Here's a general approach based on the severity of symptoms:</p> <ol style="list-style-type: none"> <li><b>Mild symptoms (Grade 1)</b>: <ul style="list-style-type: none"> <li><b>Symptoms</b>: Fewer than 4 stools per day above baseline, abdominal pain, or blood in stools without other systemic symptoms.</li> <li><b>Management</b>: ICIs may often be continued with close monitoring. Symptomatic treatment (e.g., loperamide for diarrhea) might be initiated. It's important to exclude other causes, particularly infections.</li> </ul> </li> <li><b>Moderate symptoms (Grade 2)</b>: <ul style="list-style-type: none"> <li><b>Symptoms</b>: Between 4-6 stools per day above baseline or moderate abdominal pain.</li> <li><b>Management</b>: Typically, ICI therapy is temporarily held. The patient is evaluated thoroughly, and if colitis is confirmed, corticosteroids (e.g., prednisone at 0.5-1 mg/kg/day or equivalent) may be initiated. If symptoms improve, a taper over at least 4 weeks is generally recommended. ICIs might be resumed once symptoms resolve to Grade 1 or less, depending on the clinical context.</li> </ul> </li> <li><b>Severe symptoms (Grade 3)</b>: <ul style="list-style-type: none"> <li><b>Symptoms</b>: More than 6 stools per day above baseline, severe abdominal pain, or signs of bowel perforation.</li> <li><b>Management</b>: ICIs are held. Hospitalization may be required, and high-dose corticosteroids (e.g., intravenous methylprednisolone) are initiated. If no improvement is observed within 48-72 hours, or if symptoms worsen, additional immunosuppressive therapy like infliximab might be considered. Resuming ICI therapy in this situation is</li> </ul> </li> </ol> | <p>The grading for colitis or diarrhea due to immune checkpoint inhibitors (ICIs) is based on the Common Terminology Criteria for Adverse Events (CTCAE), which is a standardized classification used to report adverse events in clinical trials. Here's the specific diagnostic criteria for Grade 3 colitis or diarrhea related to ICIs:</p> <p><b>Grade 3 Diarrhea</b>: <ul style="list-style-type: none"> <li>Increase of <math>\geq 7</math> stools per day over baseline</li> <li>Incontinence</li> <li>Limiting self-care activities of daily living (ADL)</li> <li>Hospitalization or intravenous hydration indicated</li> </ul> <p><b>Grade 3 Colitis</b>: <ul style="list-style-type: none"> <li>Severe abdominal pain</li> <li>Perforation (bowel)</li> <li>Peritonitis</li> <li>Bowel obstruction</li> <li>Fistula formation</li> <li>Limiting self-care ADL</li> <li>Intervention such as colonoscopy or surgery indicated</li> </ul> <p>It's essential to differentiate between diarrhea (an increase in stool frequency) and colitis (inflammation of the bowel, which can manifest with diarrhea but may also present with abdominal pain, bloody stools, and other symptoms). The presence of more severe symptoms, especially signs of bowel perforation or obstruction, necessitates urgent intervention.</p> <p>When encountering a patient with suspected ICI-induced diarrhea or colitis, it's crucial to conduct a comprehensive evaluation to rule out other causes, particularly infections, and to assess the full extent of the symptoms. If the patient meets the criteria for Grade 3 or higher, immediate medical intervention is required.</p> </p></p> | <p>Immune checkpoint inhibitor (ICI)-associated colitis that does not respond to high-dose corticosteroids is considered refractory and requires additional interventions. Here's a general approach to the management of refractory ICI-associated colitis:</p> <ol style="list-style-type: none"> <li><b>Infliximab</b>: <ul style="list-style-type: none"> <li>A tumor necrosis factor-alpha (TNF-<math>\alpha</math>) inhibitor.</li> <li>Dose: Typically 5 mg/kg given as an intravenous infusion.</li> <li>This can be effective in steroid-refractory cases, but it's important to rule out infections (especially tuberculosis and hepatitis) before administration as it can exacerbate them.</li> <li>A second dose may be given if there's no improvement after the first dose.</li> </ul> </li> <li><b>Vedolizumab</b>: <ul style="list-style-type: none"> <li>An integrin receptor antagonist that specifically targets the gut.</li> <li>Dose: 300 mg given as an intravenous infusion.</li> <li>Vedolizumab can be considered in patients who don't respond to infliximab or in those where infliximab is contraindicated.</li> </ul> </li> <li><b>Mycophenolate Mofetil (MMF)</b>: <ul style="list-style-type: none"> <li>An immunosuppressive agent that inhibits T and B cell proliferation.</li> <li>Dose: 1-1.5 g orally twice daily.</li> <li>It can be considered for patients who do not respond to or are intolerant of infliximab.</li> </ul> </li> <li><b>Tofacitinib</b>: <ul style="list-style-type: none"> <li>A Janus kinase (JAK) inhibitor.</li> <li>Dose: 10 mg orally twice daily.</li> <li>Preliminary data suggest that it may be effective in refractory cases, but further research is needed.</li> </ul> </li> <li><b>Other Therapies</b>: <ul style="list-style-type: none"> <li>There's ongoing research into other treatments for refractory ICI-associated colitis, including other biologics and immunosuppressive agents.</li> </ul> </li> <li><b>Supportive Care</b>: <ul style="list-style-type: none"> <li>Ensure adequate hydration and nutrition.</li> <li>Monitor and correct any electrolyte imbalances.</li> <li>Pain management as needed.</li> <li>Avoid nonsteroidal anti-inflammatory drugs (NSAIDs), as they can exacerbate colitis.</li> <li>Consider antidiarrheal</li> </ul> </li> </ol> |

|  |                                                                                                                                                                                                                                                                                                                                                                                                                                                                                                                                                                                                                                                                                                                                                                                                                                                                                                                                                                                                                                                                                                                                                                                                                                         |                                                                                                                                                                                                                                                                                                                                                                                                                                                                                                                                                                                                                                                                                                                                                                                                                                                                                                                                                                                                                                                                                                               |                                                                                                                                                                                                                                                                                                                                                                                                                                                                                                                                                                                                                                                                                                                                                                                                                                                                                                                                                                                                                                                                                                               |  |                                                                                                                                                                                                                                                                                                                                                                                                                                                                                                                                                                                                                                                                                                                                                                                                                                       |
|--|-----------------------------------------------------------------------------------------------------------------------------------------------------------------------------------------------------------------------------------------------------------------------------------------------------------------------------------------------------------------------------------------------------------------------------------------------------------------------------------------------------------------------------------------------------------------------------------------------------------------------------------------------------------------------------------------------------------------------------------------------------------------------------------------------------------------------------------------------------------------------------------------------------------------------------------------------------------------------------------------------------------------------------------------------------------------------------------------------------------------------------------------------------------------------------------------------------------------------------------------|---------------------------------------------------------------------------------------------------------------------------------------------------------------------------------------------------------------------------------------------------------------------------------------------------------------------------------------------------------------------------------------------------------------------------------------------------------------------------------------------------------------------------------------------------------------------------------------------------------------------------------------------------------------------------------------------------------------------------------------------------------------------------------------------------------------------------------------------------------------------------------------------------------------------------------------------------------------------------------------------------------------------------------------------------------------------------------------------------------------|---------------------------------------------------------------------------------------------------------------------------------------------------------------------------------------------------------------------------------------------------------------------------------------------------------------------------------------------------------------------------------------------------------------------------------------------------------------------------------------------------------------------------------------------------------------------------------------------------------------------------------------------------------------------------------------------------------------------------------------------------------------------------------------------------------------------------------------------------------------------------------------------------------------------------------------------------------------------------------------------------------------------------------------------------------------------------------------------------------------|--|---------------------------------------------------------------------------------------------------------------------------------------------------------------------------------------------------------------------------------------------------------------------------------------------------------------------------------------------------------------------------------------------------------------------------------------------------------------------------------------------------------------------------------------------------------------------------------------------------------------------------------------------------------------------------------------------------------------------------------------------------------------------------------------------------------------------------------------|
|  | <p>to evaluate the extent of colonic inflammation, wall thickening, or complications like perforation.</p> <p>4. <b>**Endoscopic Evaluation**</b>:</p> <ul style="list-style-type: none"> <li>- <b>**Colonoscopy or Flexible Sigmoidoscopy**</b>: These are the key tools for directly visualizing the mucosa and obtaining biopsies.</li> <li>- <b>**Histology**</b>: Biopsies can confirm the diagnosis by showing evidence of immune-mediated colitis, such as increased inflammatory infiltrates, cryptitis, or crypt abscesses. It's essential to differentiate ICI colitis from other causes like infectious colitis or inflammatory bowel disease.</li> </ul> <p>5. <b>**Other Tests**</b> (if indicated):</p> <ul style="list-style-type: none"> <li>- If there's suspicion of additional irAEs or overlapping symptoms (e.g., hepatitis), relevant tests (like liver function tests) should be obtained.</li> </ul> <p>When assessing patients for ICI colitis, it's crucial to rule out other potential causes of symptoms, especially infectious etiologies, as the treatment approach differs significantly. Collaboration with gastroenterologists can be invaluable for the workup and management of suspected cases.</p> | <p>watery diarrhea.</p> <p>8. <b>**Graft-versus-Host Disease (GvHD)**</b>: Relevant in patients with a history of bone marrow or stem cell transplantation.</p> <p>9. <b>**Pseudomembranous Colitis**</b>: Typically due to <i>C. difficile</i>, but the term refers to the endoscopic appearance.</p> <p>10. <b>**Neoplastic Colitis**</b>: Tumors, both benign and malignant, can sometimes mimic colitis symptoms.</p> <p>11. <b>**Irritable Bowel Syndrome (IBS)**</b>: While it's a functional disorder without the inflammatory changes seen in ICI colitis, the symptoms can sometimes overlap.</p> <p>12. <b>**Other forms of medication or treatment-related gastrointestinal toxicity**</b>: Such as chemotherapy-induced mucositis or diarrhea.</p> <p>It's crucial to perform a thorough evaluation, including history, physical examination, laboratory tests, and imaging or endoscopic procedures, to differentiate between ICI-associated colitis and other conditions in the differential diagnosis. Proper diagnosis will guide the appropriate treatment strategy and management plan.</p> | <p>approached with caution and may often be permanently discontinued.</p> <p>4. <b>**Life-threatening symptoms (Grade 4)**</b></p> <ul style="list-style-type: none"> <li>- Symptoms: Life-threatening complications such as bowel perforation, toxic megacolon, or hemodynamic instability.</li> <li>- Management: ICIs are permanently discontinued. High-dose corticosteroids are initiated, and patients often require hospitalization in an intensive care setting. Additional immunosuppression and potential surgical intervention might be necessary.</li> </ul> <p>In any case, even with mild symptoms, it's crucial to rule out other causes of diarrhea or colitis, especially infections. Furthermore, the decision to resume or permanently discontinue ICIs should be based on a multidisciplinary discussion, taking into account the overall benefit-risk profile for the individual patient.</p> <p>Lastly, it's essential to follow the latest clinical guidelines and recommendations, as the field of oncology and the understanding of ICI-related toxicities are rapidly evolving.</p> |  | <p>medications like loperamide for symptomatic relief, but use with caution and preferably under medical supervision.</p> <p>7. <b>**Monitoring**</b>:</p> <ul style="list-style-type: none"> <li>- Regularly assess the patient's response to treatment.</li> <li>- Monitor for complications of colitis, such as dehydration or infections.</li> <li>- Check for side effects of the medications used.</li> </ul> <p>It's essential to work closely with a gastroenterologist, especially when managing refractory cases. The decision on which additional therapy to use should be individualized, considering the patient's overall health, potential drug interactions, and the severity of the colitis. As with all irAEs, it's also important to remain updated with the latest clinical guidelines and research findings.</p> |
|--|-----------------------------------------------------------------------------------------------------------------------------------------------------------------------------------------------------------------------------------------------------------------------------------------------------------------------------------------------------------------------------------------------------------------------------------------------------------------------------------------------------------------------------------------------------------------------------------------------------------------------------------------------------------------------------------------------------------------------------------------------------------------------------------------------------------------------------------------------------------------------------------------------------------------------------------------------------------------------------------------------------------------------------------------------------------------------------------------------------------------------------------------------------------------------------------------------------------------------------------------|---------------------------------------------------------------------------------------------------------------------------------------------------------------------------------------------------------------------------------------------------------------------------------------------------------------------------------------------------------------------------------------------------------------------------------------------------------------------------------------------------------------------------------------------------------------------------------------------------------------------------------------------------------------------------------------------------------------------------------------------------------------------------------------------------------------------------------------------------------------------------------------------------------------------------------------------------------------------------------------------------------------------------------------------------------------------------------------------------------------|---------------------------------------------------------------------------------------------------------------------------------------------------------------------------------------------------------------------------------------------------------------------------------------------------------------------------------------------------------------------------------------------------------------------------------------------------------------------------------------------------------------------------------------------------------------------------------------------------------------------------------------------------------------------------------------------------------------------------------------------------------------------------------------------------------------------------------------------------------------------------------------------------------------------------------------------------------------------------------------------------------------------------------------------------------------------------------------------------------------|--|---------------------------------------------------------------------------------------------------------------------------------------------------------------------------------------------------------------------------------------------------------------------------------------------------------------------------------------------------------------------------------------------------------------------------------------------------------------------------------------------------------------------------------------------------------------------------------------------------------------------------------------------------------------------------------------------------------------------------------------------------------------------------------------------------------------------------------------|

|                           | Hepatitis                                                                                                                                                                                                                                                                                                                                                                                                                                                                                                                                                                                                                                                                                                                                                                                                                                                                                                                                                                                                                                                                                                                                                                                                                                                                                                                                                                                                                                                                                                                                                                                                                                                                                                                                                                            | Hepatitis                                                                                                                                                                                                                                                                                                                                                                                                                                                                                                                                                                                                                                                                                                                                                                                                                                                                                                                                                                                                                                                                                                                                                                                                                                                                                                                                                                                                                                                                                                                                                                                                                                                                                                                                                                                                                                                                                                 | Hepatitis                                                                                                                                                                                                                                                                                                                                                                                                                                                                                                                                                                                                                                                                                                                                                                                                                                                                                                                                                                                                                                                                                                                                                                                                                                                                                                                                                                                                                                                                                                                                                                                                                                                                                                                                                                                                                                                                                                                                                                                                                     | Hepatitis                                                                                                                                                                                                                                                                                                                                                                                                                                                                                                                                                                                                                                                                                                                                                                                                                                                                                                                                                                                                                                                                                             | Hepatitis                                                                                                                                                                                                                                                                                                                                                                                                                                                                                                                                                                                                                                                                                                                                                                                                                                                                                                                                                                                                                                                                                                                                                                                                                                                                                                                                                                                                                                                                                                                                                                                                                                                                                                                                                                                                                                                                                                                                                                                                                                                                                                                                                                                                                                                                                                                          |
|---------------------------|--------------------------------------------------------------------------------------------------------------------------------------------------------------------------------------------------------------------------------------------------------------------------------------------------------------------------------------------------------------------------------------------------------------------------------------------------------------------------------------------------------------------------------------------------------------------------------------------------------------------------------------------------------------------------------------------------------------------------------------------------------------------------------------------------------------------------------------------------------------------------------------------------------------------------------------------------------------------------------------------------------------------------------------------------------------------------------------------------------------------------------------------------------------------------------------------------------------------------------------------------------------------------------------------------------------------------------------------------------------------------------------------------------------------------------------------------------------------------------------------------------------------------------------------------------------------------------------------------------------------------------------------------------------------------------------------------------------------------------------------------------------------------------------|-----------------------------------------------------------------------------------------------------------------------------------------------------------------------------------------------------------------------------------------------------------------------------------------------------------------------------------------------------------------------------------------------------------------------------------------------------------------------------------------------------------------------------------------------------------------------------------------------------------------------------------------------------------------------------------------------------------------------------------------------------------------------------------------------------------------------------------------------------------------------------------------------------------------------------------------------------------------------------------------------------------------------------------------------------------------------------------------------------------------------------------------------------------------------------------------------------------------------------------------------------------------------------------------------------------------------------------------------------------------------------------------------------------------------------------------------------------------------------------------------------------------------------------------------------------------------------------------------------------------------------------------------------------------------------------------------------------------------------------------------------------------------------------------------------------------------------------------------------------------------------------------------------------|-------------------------------------------------------------------------------------------------------------------------------------------------------------------------------------------------------------------------------------------------------------------------------------------------------------------------------------------------------------------------------------------------------------------------------------------------------------------------------------------------------------------------------------------------------------------------------------------------------------------------------------------------------------------------------------------------------------------------------------------------------------------------------------------------------------------------------------------------------------------------------------------------------------------------------------------------------------------------------------------------------------------------------------------------------------------------------------------------------------------------------------------------------------------------------------------------------------------------------------------------------------------------------------------------------------------------------------------------------------------------------------------------------------------------------------------------------------------------------------------------------------------------------------------------------------------------------------------------------------------------------------------------------------------------------------------------------------------------------------------------------------------------------------------------------------------------------------------------------------------------------------------------------------------------------------------------------------------------------------------------------------------------------|-------------------------------------------------------------------------------------------------------------------------------------------------------------------------------------------------------------------------------------------------------------------------------------------------------------------------------------------------------------------------------------------------------------------------------------------------------------------------------------------------------------------------------------------------------------------------------------------------------------------------------------------------------------------------------------------------------------------------------------------------------------------------------------------------------------------------------------------------------------------------------------------------------------------------------------------------------------------------------------------------------------------------------------------------------------------------------------------------------|------------------------------------------------------------------------------------------------------------------------------------------------------------------------------------------------------------------------------------------------------------------------------------------------------------------------------------------------------------------------------------------------------------------------------------------------------------------------------------------------------------------------------------------------------------------------------------------------------------------------------------------------------------------------------------------------------------------------------------------------------------------------------------------------------------------------------------------------------------------------------------------------------------------------------------------------------------------------------------------------------------------------------------------------------------------------------------------------------------------------------------------------------------------------------------------------------------------------------------------------------------------------------------------------------------------------------------------------------------------------------------------------------------------------------------------------------------------------------------------------------------------------------------------------------------------------------------------------------------------------------------------------------------------------------------------------------------------------------------------------------------------------------------------------------------------------------------------------------------------------------------------------------------------------------------------------------------------------------------------------------------------------------------------------------------------------------------------------------------------------------------------------------------------------------------------------------------------------------------------------------------------------------------------------------------------------------------|
| Question                  | What is the primary diagnostic workup for suspected immune checkpoint inhibitor hepatitis?                                                                                                                                                                                                                                                                                                                                                                                                                                                                                                                                                                                                                                                                                                                                                                                                                                                                                                                                                                                                                                                                                                                                                                                                                                                                                                                                                                                                                                                                                                                                                                                                                                                                                           | What are other conditions in the differential diagnosis when considering immune checkpoint inhibitor associated hepatitis?                                                                                                                                                                                                                                                                                                                                                                                                                                                                                                                                                                                                                                                                                                                                                                                                                                                                                                                                                                                                                                                                                                                                                                                                                                                                                                                                                                                                                                                                                                                                                                                                                                                                                                                                                                                | Are there any situations where immune checkpoint inhibitors can be continued even if hepatitis is suspected?                                                                                                                                                                                                                                                                                                                                                                                                                                                                                                                                                                                                                                                                                                                                                                                                                                                                                                                                                                                                                                                                                                                                                                                                                                                                                                                                                                                                                                                                                                                                                                                                                                                                                                                                                                                                                                                                                                                  | What are the diagnostic criteria for grade 3 hepatitis from immune checkpoint inhibitors?                                                                                                                                                                                                                                                                                                                                                                                                                                                                                                                                                                                                                                                                                                                                                                                                                                                                                                                                                                                                             | What are the primary treatments for immune checkpoint inhibitor-associated hepatitis that does not respond to high-dose steroids?                                                                                                                                                                                                                                                                                                                                                                                                                                                                                                                                                                                                                                                                                                                                                                                                                                                                                                                                                                                                                                                                                                                                                                                                                                                                                                                                                                                                                                                                                                                                                                                                                                                                                                                                                                                                                                                                                                                                                                                                                                                                                                                                                                                                  |
| Answer Engine 1 (ChatGPT) | <p>Immune checkpoint inhibitor (ICI) hepatitis, also known as immune-mediated hepatitis, is a potential adverse event resulting from ICI therapy. If suspected, a thorough diagnostic workup is essential for accurate diagnosis and management. Here's a general approach:</p> <p>1. <b>Clinical Assessment</b>:</p> <ul style="list-style-type: none"> <li>- <b>History</b>: Check for the onset and progression of symptoms like jaundice, fatigue, anorexia, nausea, or abdominal pain. Review all medications to ensure that hepatotoxic drugs aren't causing the elevated liver enzymes.</li> <li>- <b>Physical Examination</b>: Look for signs of liver disease, such as jaundice, hepatomegaly, or splenomegaly.</li> </ul> <p>2. <b>Laboratory Tests</b>:</p> <ul style="list-style-type: none"> <li>- <b>Liver Function Tests (LFTs)</b>: Alanine aminotransferase (ALT), aspartate aminotransferase (AST), alkaline phosphatase (ALP), bilirubin, and albumin levels. These can help ascertain the degree and type of liver injury.</li> <li>- <b>Complete Blood Count (CBC)</b>: To check for anemia or other abnormalities.</li> <li>- <b>Coagulation Profile</b>: Including prothrombin time (PT) and international normalized ratio (INR) to assess liver synthetic function.</li> <li>- <b>Serologic Tests</b>: For common viral hepatitis (hepatitis A, B, C, and E) to rule out viral causes of hepatitis.</li> <li>- <b>Autoimmune Workup</b>: Including antinuclear antibody (ANA), anti-smooth muscle antibody (ASMA), and anti-liver/kidney microsomal antibody (anti-LKM) to rule out autoimmune hepatitis.</li> </ul> <p>3. <b>Imaging</b>:</p> <ul style="list-style-type: none"> <li>- <b>Abdominal Ultrasound</b>: Evaluates the liver's size,</li> </ul> | <p>When evaluating a patient for suspected immune checkpoint inhibitor (ICI) associated hepatitis, it's essential to consider other conditions that can result in liver injury or elevated liver enzymes. Here's a list of differential diagnoses to consider:</p> <ol style="list-style-type: none"> <li><b>Infectious Hepatitis</b>: <ul style="list-style-type: none"> <li>- <b>Viral</b>: Hepatitis A, B, C, D, and E, cytomegalovirus (CMV), Epstein-Barr virus (EBV), and herpes simplex virus (HSV).</li> <li>- <b>Other Infectious Causes</b>: Other infectious agents, such as leptospirosis or certain parasitic infections, can cause hepatitis.</li> </ul> </li> <li><b>Autoimmune Hepatitis</b>: An immune-mediated inflammation of the liver, which may resemble ICI hepatitis both clinically and histologically.</li> <li><b>Alcoholic Hepatitis</b>: In patients with a history of excessive alcohol intake.</li> <li><b>Non-Alcoholic Steatohepatitis (NASH)</b>: A more severe form of non-alcoholic fatty liver disease (NAFLD).</li> <li><b>Drug-Induced Liver Injury (DILI)</b>: Other than ICIs, several medications can induce liver injury, including antibiotics (e.g., amoxicillin-clavulanate), antiepileptics (e.g., valproate, phenytoin), statins, acetaminophen, and many others.</li> <li><b>Ischemic Hepatitis (or Shock Liver)</b>: Caused by decreased blood flow to the liver, often due to hypotension or shock.</li> <li><b>Biliary Diseases</b>: <ul style="list-style-type: none"> <li>- <b>Cholestatic Liver Diseases</b>: Such as primary biliary cirrhosis (PBC) or primary sclerosing cholangitis (PSC).</li> <li>- <b>Biliary Obstruction</b>: From gallstones, tumors, or strictures leading to elevated liver enzymes.</li> </ul> </li> <li><b>Vascular Disorders</b>: <ul style="list-style-type: none"> <li>- <b>Budd-Chiari</b></li> </ul> </li> </ol> | <p>The decision to continue or withhold immune checkpoint inhibitors (ICIs) when hepatitis is suspected largely depends on the severity of the liver injury and the overall clinical context. Here's a general approach based on the severity of liver enzyme elevations:</p> <ol style="list-style-type: none"> <li><b>Mild liver enzyme elevations (Grade 1)</b> <ul style="list-style-type: none"> <li>- <b>AST/ALT</b>: Less than 3 times the upper limit of normal (ULN).</li> <li>- <b>Bilirubin</b>: Less than 1.5 times ULN.</li> <li>- <b>Alkaline Phosphatase (ALP)</b>: Less than 2.5 times ULN.</li> <li>- <b>Management</b>: ICIs may often be continued with close monitoring. However, it's essential to frequently recheck liver function tests and ensure there isn't progressive elevation.</li> </ul> </li> <li><b>Moderate liver enzyme elevations (Grade 2)</b> <ul style="list-style-type: none"> <li>- <b>AST/ALT</b>: Between 3-5 times ULN.</li> <li>- <b>Bilirubin</b>: Between 1.5-3 times ULN.</li> <li>- <b>ALP</b>: Between 2.5-5 times ULN.</li> <li>- <b>Management</b>: Typically, ICI therapy is temporarily held. A thorough evaluation is done to ascertain the cause of the liver injury. If ICI-induced hepatitis is confirmed or highly suspected, corticosteroids may be initiated. ICIs might be resumed once liver enzymes improve and approach near-normal values, depending on the clinical context.</li> </ul> </li> <li><b>Severe liver enzyme elevations (Grade 3 and 4)</b> <ul style="list-style-type: none"> <li>- <b>AST/ALT</b>: More than 5 times ULN.</li> <li>- <b>Bilirubin</b>: More than 3 times ULN.</li> <li>- <b>ALP</b>: More than 5 times ULN.</li> <li>- <b>Management</b>: ICIs are held, and high-dose corticosteroids are initiated. A comprehensive evaluation, potentially including a liver biopsy, is undertaken to confirm the diagnosis. In cases where there is no improvement with steroids or if liver enzymes continue to</li> </ul> </li> </ol> | <p>The grading for hepatitis due to immune checkpoint inhibitors (ICIs) is based on the Common Terminology Criteria for Adverse Events (CTCAE), which provides a standardized classification for reporting adverse events in clinical trials. Here's the specific diagnostic criteria for Grade 3 hepatitis related to ICIs:</p> <p><b>Grade 3 Hepatitis</b>:</p> <ul style="list-style-type: none"> <li>- <b>AST (Aspartate aminotransferase)</b>: &gt; 5 to ≤ 20 times the upper limit of normal (ULN).</li> <li>- <b>ALT (Alanine aminotransferase)</b>: &gt; 5 to ≤ 20 times the ULN.</li> <li>- <b>Bilirubin</b>: &gt; 3 to ≤ 10 times the ULN.</li> <li>- <b>Alkaline Phosphatase (ALP)</b>: &gt; 5 to ≤ 20 times the ULN.</li> </ul> <p>These elevations indicate severe liver injury and require prompt medical attention. It's essential to conduct a thorough evaluation to ascertain the cause of the liver injury and to initiate appropriate management. Given the potential risks associated with Grade 3 hepatitis, the continuation of ICIs is typically approached with caution.</p> | <p>For immune checkpoint inhibitor (ICI)-associated hepatitis that doesn't respond to high-dose corticosteroids (referred to as steroid-refractory hepatitis), additional interventions are required. Here are some of the primary treatments for refractory ICI-associated hepatitis:</p> <ol style="list-style-type: none"> <li><b>Mycophenolate Mofetil (MMF)</b> <ul style="list-style-type: none"> <li>- An immunosuppressive agent that inhibits T and B cell proliferation.</li> <li>- <b>Dose</b>: Typically 1-1.5 g orally twice daily.</li> <li>- It's often the first choice after steroids for refractory ICI hepatitis due to its efficacy and safety profile.</li> </ul> </li> <li><b>Infliximab</b> <ul style="list-style-type: none"> <li>- A tumor necrosis factor-alpha (TNF-α) inhibitor.</li> <li>- <b>Dose</b>: Typically 5 mg/kg given as an intravenous infusion.</li> <li>- It's effective for various immune-related adverse events, including colitis. However, its use in ICI-associated hepatitis is more controversial, given concerns about potential hepatotoxicity. It's generally reserved for cases refractory to other treatments and requires careful consideration and monitoring.</li> </ul> </li> <li><b>Tacrolimus</b> <ul style="list-style-type: none"> <li>- A calcineurin inhibitor that suppresses T-cell activation.</li> <li>- It's another option for refractory cases, but its use is based more on its efficacy in autoimmune hepatitis than specific data in ICI-associated hepatitis.</li> </ul> </li> <li><b>Antithymocyte Globulin (ATG)</b> <ul style="list-style-type: none"> <li>- An immunosuppressive agent that targets T-cells.</li> <li>- Its use in refractory ICI-associated hepatitis is based on anecdotal evidence, and it's reserved for severe, life-threatening cases.</li> </ul> </li> <li><b>Other Potential Agents</b> <ul style="list-style-type: none"> <li>- <b>Tofacitinib</b>: A Janus kinase (JAK) inhibitor, has been suggested for refractory cases based on its efficacy in autoimmune hepatitis.</li> <li>- <b>Vedolizumab</b>: An integrin receptor antagonist, might be considered for those with concurrent refractory colitis and hepatitis.</li> <li>- Ongoing research may identify other effective treatments for</li> </ul> </li> </ol> |

|  |                                                                                                                                                                                                                                                                                                                                                                                                                                                                                                                                                                                                                                                                                                                                                                                                                                                                                                                                                                                                                                                                                                                                                                                                                                                                                                                     |                                                                                                                                                                                                                                                                                                                                                                                                                                                                                                                                                                                                                                                                                                                                                                                                                                                                                                                                                                                                                                                                                                                                              |                                                                                                                                                                                                                                                                                                                                                                                                                                                                                                                                                                                              |  |                                                                                                                                                                                                                                                                                                                                                                                                                                                                                                                                                                                                                                                                                                                                                                                                                                                                              |
|--|---------------------------------------------------------------------------------------------------------------------------------------------------------------------------------------------------------------------------------------------------------------------------------------------------------------------------------------------------------------------------------------------------------------------------------------------------------------------------------------------------------------------------------------------------------------------------------------------------------------------------------------------------------------------------------------------------------------------------------------------------------------------------------------------------------------------------------------------------------------------------------------------------------------------------------------------------------------------------------------------------------------------------------------------------------------------------------------------------------------------------------------------------------------------------------------------------------------------------------------------------------------------------------------------------------------------|----------------------------------------------------------------------------------------------------------------------------------------------------------------------------------------------------------------------------------------------------------------------------------------------------------------------------------------------------------------------------------------------------------------------------------------------------------------------------------------------------------------------------------------------------------------------------------------------------------------------------------------------------------------------------------------------------------------------------------------------------------------------------------------------------------------------------------------------------------------------------------------------------------------------------------------------------------------------------------------------------------------------------------------------------------------------------------------------------------------------------------------------|----------------------------------------------------------------------------------------------------------------------------------------------------------------------------------------------------------------------------------------------------------------------------------------------------------------------------------------------------------------------------------------------------------------------------------------------------------------------------------------------------------------------------------------------------------------------------------------------|--|------------------------------------------------------------------------------------------------------------------------------------------------------------------------------------------------------------------------------------------------------------------------------------------------------------------------------------------------------------------------------------------------------------------------------------------------------------------------------------------------------------------------------------------------------------------------------------------------------------------------------------------------------------------------------------------------------------------------------------------------------------------------------------------------------------------------------------------------------------------------------|
|  | <p>echotexture, and to rule out biliary obstruction as a cause for elevated liver enzymes.</p> <ul style="list-style-type: none"> <li>- <b>Other Imaging</b>: CT or MRI may be utilized if further characterization is needed or if there's suspicion of liver masses or biliary complications.</li> </ul> <p>4. <b>Liver Biopsy</b>:</p> <ul style="list-style-type: none"> <li>- If the diagnosis remains uncertain after initial workup or to differentiate between ICI hepatitis and other causes, a liver biopsy may be performed. Histology can often show a specific pattern of injury in ICI hepatitis, typically characterized by lobular hepatitis with a prominent lymphocytic infiltrate.</li> </ul> <p>5. <b>Other Investigations</b>:</p> <ul style="list-style-type: none"> <li>- Rule out other drug-induced liver injuries, especially if the patient is on other medications known to cause hepatotoxicity.</li> <li>- In some situations, metabolic or genetic testing may be warranted if there's a suspicion of inherited liver diseases.</li> </ul> <p>As with all suspected irAEs, early recognition and management of ICI hepatitis are crucial. Collaboration with hepatologists or gastroenterologists can provide valuable insight into the workup and management of these patients.</p> | <p><b>Syndrome</b>: Obstruction of the hepatic veins.</p> <ul style="list-style-type: none"> <li>- <b>Venous Outflow Obstruction</b>: Such as from hepatic vein thrombosis.</li> </ul> <p>9. <b>Hepatic Tumor or Metastasis</b>: Primary liver cancers or metastatic disease to the liver can cause elevated liver enzymes.</p> <p>10. <b>Toxic Hepatitis</b>: Resulting from exposure to toxins or chemicals, such as certain mushrooms or industrial chemicals.</p> <p>11. <b>Granulomatous Liver Diseases</b>: Such as sarcoidosis or granulomatous infections (e.g., tuberculosis).</p> <p>12. <b>Genetic and Metabolic Disorders</b>: Like Wilson's disease, hemochromatosis, or alpha-1 antitrypsin deficiency.</p> <p>13. <b>Other</b>: Other rare causes, such as hepatic amyloidosis or nodular regenerative hyperplasia.</p> <p>Given the broad differential diagnosis for hepatitis, a comprehensive evaluation, including history, physical examination, laboratory tests, imaging, and possibly liver biopsy, is crucial. Properly identifying the cause will guide the appropriate treatment strategy and management plan.</p> | <p>rise, additional immunosuppression (e.g., mycophenolate mofetil) may be considered. Resuming ICI therapy in this situation is approached with caution and may often be permanently discontinued.</p> <p>It's essential to differentiate ICI-induced hepatitis from other causes, especially when considering continuing therapy. The potential risks and benefits of resuming ICIs should be weighed carefully. Collaboration with hepatologists or gastroenterologists can be invaluable in such situations. Always consult current clinical guidelines when making these decisions.</p> |  | <p>refractory ICI-associated hepatitis.</p> <p>6. <b>Supportive Care</b></p> <ul style="list-style-type: none"> <li>- Ensure close monitoring of liver function tests and manage any complications that arise from liver dysfunction.</li> <li>- Consider the potential drug interactions when initiating new therapies, given liver involvement.</li> </ul> <p>7. <b>Monitoring</b></p> <ul style="list-style-type: none"> <li>- Regularly assess the patient's response to treatment, monitor liver function, and check for potential drug side effects.</li> </ul> <p>It's crucial to involve hepatologists or gastroenterologists in the care of these patients, given the complexity of managing refractory ICI-associated hepatitis. Decisions should be based on the most up-to-date clinical guidelines, trials, and the individual patient's clinical scenario.</p> |
|--|---------------------------------------------------------------------------------------------------------------------------------------------------------------------------------------------------------------------------------------------------------------------------------------------------------------------------------------------------------------------------------------------------------------------------------------------------------------------------------------------------------------------------------------------------------------------------------------------------------------------------------------------------------------------------------------------------------------------------------------------------------------------------------------------------------------------------------------------------------------------------------------------------------------------------------------------------------------------------------------------------------------------------------------------------------------------------------------------------------------------------------------------------------------------------------------------------------------------------------------------------------------------------------------------------------------------|----------------------------------------------------------------------------------------------------------------------------------------------------------------------------------------------------------------------------------------------------------------------------------------------------------------------------------------------------------------------------------------------------------------------------------------------------------------------------------------------------------------------------------------------------------------------------------------------------------------------------------------------------------------------------------------------------------------------------------------------------------------------------------------------------------------------------------------------------------------------------------------------------------------------------------------------------------------------------------------------------------------------------------------------------------------------------------------------------------------------------------------------|----------------------------------------------------------------------------------------------------------------------------------------------------------------------------------------------------------------------------------------------------------------------------------------------------------------------------------------------------------------------------------------------------------------------------------------------------------------------------------------------------------------------------------------------------------------------------------------------|--|------------------------------------------------------------------------------------------------------------------------------------------------------------------------------------------------------------------------------------------------------------------------------------------------------------------------------------------------------------------------------------------------------------------------------------------------------------------------------------------------------------------------------------------------------------------------------------------------------------------------------------------------------------------------------------------------------------------------------------------------------------------------------------------------------------------------------------------------------------------------------|

|                           | Pneumonitis                                                                                                                                                                                                                                                                                                                                                                                                                                                                                                                                                                                                                                                                                                                                                                                                                                                                                                                                                                                                                                                                                                                                                                                                                                                                                                                                                                                                                                                                                                                                                                                                                                                                                                                                                                                                                                                            | Pneumonitis                                                                                                                                                                                                                                                                                                                                                                                                                                                                                                                                                                                                                                                                                                                                                                                                                                                                                                                                                                                                                                                                                                                                                                                                                                                                                                                                                                                                                                                                                                                                                                                                                                                                                                                                                                                                     | Pneumonitis                                                                                                                                                                                                                                                                                                                                                                                                                                                                                                                                                                                                                                                                                                                                                                                                                                                                                                                                                                                                                                                                                                                                                                                                                                                                                                                                                                                                                                                                                                                                                                                                                                                                                                                                                                                                                                                                                                                                                                                        | Pneumonitis                                                                                                                                                                                                                                                                                                                                                                                                                                                                                                                                                                                                                                                                                                                                                                                                                                                                                                                                                                                                                                                                                                                                            | Pneumonitis                                                                                                                                                                                                                                                                                                                                                                                                                                                                                                                                                                                                                                                                                                                                                                                                                                                                                                                                                                                                                                                                                                                                                                                                                                                                                                                                                                                                                                                                                                                                                                                                                                                                                                                                                                                                                                                                                                                                                                                                                                                                                                                                                                                                                                                                                                                        |
|---------------------------|------------------------------------------------------------------------------------------------------------------------------------------------------------------------------------------------------------------------------------------------------------------------------------------------------------------------------------------------------------------------------------------------------------------------------------------------------------------------------------------------------------------------------------------------------------------------------------------------------------------------------------------------------------------------------------------------------------------------------------------------------------------------------------------------------------------------------------------------------------------------------------------------------------------------------------------------------------------------------------------------------------------------------------------------------------------------------------------------------------------------------------------------------------------------------------------------------------------------------------------------------------------------------------------------------------------------------------------------------------------------------------------------------------------------------------------------------------------------------------------------------------------------------------------------------------------------------------------------------------------------------------------------------------------------------------------------------------------------------------------------------------------------------------------------------------------------------------------------------------------------|-----------------------------------------------------------------------------------------------------------------------------------------------------------------------------------------------------------------------------------------------------------------------------------------------------------------------------------------------------------------------------------------------------------------------------------------------------------------------------------------------------------------------------------------------------------------------------------------------------------------------------------------------------------------------------------------------------------------------------------------------------------------------------------------------------------------------------------------------------------------------------------------------------------------------------------------------------------------------------------------------------------------------------------------------------------------------------------------------------------------------------------------------------------------------------------------------------------------------------------------------------------------------------------------------------------------------------------------------------------------------------------------------------------------------------------------------------------------------------------------------------------------------------------------------------------------------------------------------------------------------------------------------------------------------------------------------------------------------------------------------------------------------------------------------------------------|----------------------------------------------------------------------------------------------------------------------------------------------------------------------------------------------------------------------------------------------------------------------------------------------------------------------------------------------------------------------------------------------------------------------------------------------------------------------------------------------------------------------------------------------------------------------------------------------------------------------------------------------------------------------------------------------------------------------------------------------------------------------------------------------------------------------------------------------------------------------------------------------------------------------------------------------------------------------------------------------------------------------------------------------------------------------------------------------------------------------------------------------------------------------------------------------------------------------------------------------------------------------------------------------------------------------------------------------------------------------------------------------------------------------------------------------------------------------------------------------------------------------------------------------------------------------------------------------------------------------------------------------------------------------------------------------------------------------------------------------------------------------------------------------------------------------------------------------------------------------------------------------------------------------------------------------------------------------------------------------------|--------------------------------------------------------------------------------------------------------------------------------------------------------------------------------------------------------------------------------------------------------------------------------------------------------------------------------------------------------------------------------------------------------------------------------------------------------------------------------------------------------------------------------------------------------------------------------------------------------------------------------------------------------------------------------------------------------------------------------------------------------------------------------------------------------------------------------------------------------------------------------------------------------------------------------------------------------------------------------------------------------------------------------------------------------------------------------------------------------------------------------------------------------|------------------------------------------------------------------------------------------------------------------------------------------------------------------------------------------------------------------------------------------------------------------------------------------------------------------------------------------------------------------------------------------------------------------------------------------------------------------------------------------------------------------------------------------------------------------------------------------------------------------------------------------------------------------------------------------------------------------------------------------------------------------------------------------------------------------------------------------------------------------------------------------------------------------------------------------------------------------------------------------------------------------------------------------------------------------------------------------------------------------------------------------------------------------------------------------------------------------------------------------------------------------------------------------------------------------------------------------------------------------------------------------------------------------------------------------------------------------------------------------------------------------------------------------------------------------------------------------------------------------------------------------------------------------------------------------------------------------------------------------------------------------------------------------------------------------------------------------------------------------------------------------------------------------------------------------------------------------------------------------------------------------------------------------------------------------------------------------------------------------------------------------------------------------------------------------------------------------------------------------------------------------------------------------------------------------------------------|
| Question                  | What is the primary diagnostic workup for suspected immune checkpoint inhibitor pneumonitis?                                                                                                                                                                                                                                                                                                                                                                                                                                                                                                                                                                                                                                                                                                                                                                                                                                                                                                                                                                                                                                                                                                                                                                                                                                                                                                                                                                                                                                                                                                                                                                                                                                                                                                                                                                           | What are other conditions in the differential diagnosis when considering immune checkpoint inhibitor associated pneumonitis?                                                                                                                                                                                                                                                                                                                                                                                                                                                                                                                                                                                                                                                                                                                                                                                                                                                                                                                                                                                                                                                                                                                                                                                                                                                                                                                                                                                                                                                                                                                                                                                                                                                                                    | Are there any situations where immune checkpoint inhibitors can be continued even if pneumonitis is suspected?                                                                                                                                                                                                                                                                                                                                                                                                                                                                                                                                                                                                                                                                                                                                                                                                                                                                                                                                                                                                                                                                                                                                                                                                                                                                                                                                                                                                                                                                                                                                                                                                                                                                                                                                                                                                                                                                                     | What are the diagnostic criteria for grade 3 pneumonitis from immune checkpoint inhibitors?                                                                                                                                                                                                                                                                                                                                                                                                                                                                                                                                                                                                                                                                                                                                                                                                                                                                                                                                                                                                                                                            | What are the primary treatments for immune checkpoint inhibitor-associated pneumonitis that does not respond to high-dose steroids?                                                                                                                                                                                                                                                                                                                                                                                                                                                                                                                                                                                                                                                                                                                                                                                                                                                                                                                                                                                                                                                                                                                                                                                                                                                                                                                                                                                                                                                                                                                                                                                                                                                                                                                                                                                                                                                                                                                                                                                                                                                                                                                                                                                                |
| Answer Engine 1 (ChatGPT) | <p>Immune checkpoint inhibitor (ICI) pneumonitis is an inflammatory reaction in the lungs due to ICIs. If suspected, a thorough diagnostic workup is essential to ensure accurate diagnosis and timely management. Here's a general approach:</p> <ol style="list-style-type: none"> <li><b>Clinical Assessment</b>: <ul style="list-style-type: none"> <li><b>History</b>: Assess for symptoms like cough, dyspnea, chest pain, fever, or fatigue. Evaluate for other potential causes, like infections, heart failure, or pulmonary embolism.</li> <li><b>Physical Examination</b>: Check for signs of respiratory distress, abnormal lung sounds, or evidence of other etiologies (e.g., cardiac failure).</li> </ul> </li> <li><b>Imaging</b>: <ul style="list-style-type: none"> <li><b>Chest X-ray</b>: A basic initial evaluation that may show infiltrates, consolidations, or interstitial changes.</li> <li><b>High-Resolution Computed Tomography (HRCT)</b>: Provides detailed images and is the imaging modality of choice for ICI pneumonitis. Typical findings include ground-glass opacities, consolidations, and interstitial changes. The distribution and pattern of abnormalities can help differentiate ICI pneumonitis from other lung conditions.</li> </ul> </li> <li><b>Pulmonary Function Tests (PFTs)</b>: <ul style="list-style-type: none"> <li>Useful for quantifying the extent of lung function impairment. Decreased diffusion capacity (DLCO) is commonly seen in ICI pneumonitis.</li> </ul> </li> <li><b>Laboratory Tests</b>: <ul style="list-style-type: none"> <li>While there's no specific blood test for ICI pneumonitis, it's helpful to rule out infections. Tests might include complete blood count (CBC), blood cultures, and serologies for specific pathogens.</li> <li><b>Bronchoalveolar</b></li> </ul> </li> </ol> | <p>When evaluating a patient for suspected immune checkpoint inhibitor (ICI) associated pneumonitis, it's important to consider a range of other conditions that can mimic its presentation. Here's a list of differential diagnoses to consider:</p> <ol style="list-style-type: none"> <li><b>Infectious Pneumonia</b>: <ul style="list-style-type: none"> <li>Bacterial, viral (e.g., influenza, respiratory syncytial virus, COVID-19), fungal (e.g., Pneumocystis jirovecii, Aspergillus), or mycobacterial infections can all present with symptoms similar to ICI pneumonitis.</li> </ul> </li> <li><b>Cardiac Conditions</b>: <ul style="list-style-type: none"> <li><b>Heart Failure</b>: Can cause dyspnea, fatigue, and bilateral pulmonary edema on imaging.</li> <li><b>Acute Coronary Syndromes</b>: Myocardial ischemia or infarction can sometimes present with breathlessness without typical chest pain.</li> </ul> </li> <li><b>Pulmonary Embolism</b>: Acute onset dyspnea, chest pain, or hemoptysis with or without risk factors for venous thromboembolism.</li> <li><b>Drug-Induced Pneumonitis</b>: Other medications besides ICIs can cause lung inflammation, such as certain antibiotics, amiodarone, methotrexate, and some chemotherapy agents.</li> <li><b>Radiation Pneumonitis</b>: In patients with a history of thoracic radiation, radiation-induced lung injury can occur weeks to months after treatment.</li> <li><b>Idiopathic Pneumonias</b>: Including conditions like idiopathic pulmonary fibrosis or acute interstitial pneumonia.</li> <li><b>Connective Tissue Disease-Associated Lung Disease</b>: Diseases such as rheumatoid arthritis, systemic lupus erythematosus, or systemic sclerosis can have lung involvement that mimics ICI pneumonitis.</li> </ol> | <p>The decision to continue or withhold immune checkpoint inhibitors (ICIs) when pneumonitis is suspected largely depends on the severity of the pneumonitis and the overall clinical context. Here's a general approach based on the severity:</p> <ol style="list-style-type: none"> <li><b>Mild Symptoms (Grade 1 Pneumonitis)</b>: <ul style="list-style-type: none"> <li><b>Symptoms</b>: Mild symptoms such as a slight cough or dyspnea on exertion, without significant changes on imaging.</li> <li><b>Management</b>: In some cases, ICIs can be continued with close monitoring. However, frequent assessment of symptoms and repeated imaging studies are essential to ensure there isn't progression. If any progression in symptoms or imaging findings occurs, ICI treatment should be halted and appropriate management initiated.</li> </ul> </li> <li><b>Moderate Symptoms (Grade 2 Pneumonitis)</b>: <ul style="list-style-type: none"> <li><b>Symptoms</b>: Moderate symptoms that limit daily activities, or more significant radiographic changes.</li> <li><b>Management</b>: Typically, ICI therapy is temporarily held. Corticosteroids are often initiated to manage the inflammation. If symptoms resolve and imaging findings improve, ICI therapy may be cautiously resumed, but this depends on the clinical context and a multidisciplinary discussion.</li> </ul> </li> <li><b>Severe (Grade 3) or Life-threatening (Grade 4) Pneumonitis</b>: <ul style="list-style-type: none"> <li><b>Symptoms</b>: Severe respiratory symptoms, oxygen requirement, or extensive radiographic involvement.</li> <li><b>Management</b>: ICIs are discontinued, and high-dose corticosteroids are initiated. In life-threatening cases or if there's no improvement with steroids, additional immunosuppressive therapy, like infliximab or mycophenolate mofetil, might be considered. Given the potential severity and risks associated with high-grade</li> </ul> </li> </ol> | <p>The grading for pneumonitis due to immune checkpoint inhibitors (ICIs) is based on the Common Terminology Criteria for Adverse Events (CTCAE), which provides a standardized classification for reporting adverse events in clinical trials. Here's the specific diagnostic criteria for Grade 3 pneumonitis related to ICIs:</p> <p><b>Grade 3 Pneumonitis</b>:</p> <ul style="list-style-type: none"> <li>Severe symptoms that limit self-care activities of daily living.</li> <li>Severe radiographic abnormalities.</li> <li>May require hospitalization and supplemental oxygen to maintain oxygen saturation.</li> </ul> <p>It's worth noting that while CTCAE provides specific grading, the actual clinical scenario might require interpretation of these criteria in the context of the individual patient's presentation. Grade 3 pneumonitis is a serious condition and demands prompt intervention, including discontinuation of the ICI and initiation of corticosteroids or other immunosuppressive agents. Properly identifying the grade of pneumonitis is vital for guiding treatment decisions and ensuring patient safety.</p> | <p>For immune checkpoint inhibitor (ICI)-associated pneumonitis that doesn't respond to high-dose corticosteroids (referred to as steroid-refractory pneumonitis), additional immunosuppressive interventions are required. Here are some of the primary treatments for refractory ICI-associated pneumonitis:</p> <ol style="list-style-type: none"> <li><b>Infliximab</b>: <ul style="list-style-type: none"> <li>A tumor necrosis factor-alpha (TNF-<math>\alpha</math>) inhibitor.</li> <li>Dose: Typically 5 mg/kg given as an intravenous infusion.</li> <li>It's often used for steroid-refractory cases, especially if there's a concurrent diagnosis of ICI-associated colitis. However, it's crucial to rule out any latent or active infections, particularly tuberculosis, before administering infliximab.</li> </ul> </li> <li><b>Mycophenolate Mofetil (MMF)</b>: <ul style="list-style-type: none"> <li>An immunosuppressive agent that inhibits T and B cell proliferation.</li> <li>Dose: 1-1.5 g orally twice daily.</li> <li>MMF can be considered for patients who are refractory to or intolerant of infliximab.</li> </ul> </li> <li><b>Cyclophosphamide</b>: <ul style="list-style-type: none"> <li>A cytotoxic agent.</li> <li>Can be used for severe, life-threatening ICI pneumonitis that doesn't respond to other therapies.</li> </ul> </li> <li><b>Intravenous Immunoglobulin (IVIg)</b>: <ul style="list-style-type: none"> <li>High-dose IVIg has been used in some severe refractory cases, although data on its efficacy in ICI pneumonitis is limited.</li> </ul> </li> <li><b>Other Potential Agents</b>: <ul style="list-style-type: none"> <li><b>Tofacitinib</b>: A Janus kinase (JAK) inhibitor, has been suggested for refractory cases, but its use in ICI pneumonitis is not well-established.</li> <li>Ongoing research may identify other effective treatments for refractory ICI-associated pneumonitis.</li> </ul> </li> <li><b>Supportive Care</b>: <ul style="list-style-type: none"> <li>Oxygen supplementation for hypoxemia.</li> <li>Bronchodilators for wheezing or bronchospasm.</li> <li>Symptomatic treatments like cough suppressants.</li> <li>Monitoring in an intensive care unit (ICU) may be necessary for patients with severe respiratory</li> </ul> </li> </ol> |

|  |                                                                                                                                                                                                                                                                                                                                                                                                                                                                                                                                                                                                                                                                                                                                                                                                                                                                                                                                                                                                                                                                                                                                                                                                                                                                                                                                                 |                                                                                                                                                                                                                                                                                                                                                                                                                                                                                                                                                                                                                                                                                                                                                                                                                                                                                                                                                                                                                                                                                                                                                                                                                                                                                                                        |                                                                                                                                                                                                                                                                                                                                                                                                                                                                                              |  |                                                                                                                                                                                                                                                                                                                                                                                                                                                                                                                                                                                                       |
|--|-------------------------------------------------------------------------------------------------------------------------------------------------------------------------------------------------------------------------------------------------------------------------------------------------------------------------------------------------------------------------------------------------------------------------------------------------------------------------------------------------------------------------------------------------------------------------------------------------------------------------------------------------------------------------------------------------------------------------------------------------------------------------------------------------------------------------------------------------------------------------------------------------------------------------------------------------------------------------------------------------------------------------------------------------------------------------------------------------------------------------------------------------------------------------------------------------------------------------------------------------------------------------------------------------------------------------------------------------|------------------------------------------------------------------------------------------------------------------------------------------------------------------------------------------------------------------------------------------------------------------------------------------------------------------------------------------------------------------------------------------------------------------------------------------------------------------------------------------------------------------------------------------------------------------------------------------------------------------------------------------------------------------------------------------------------------------------------------------------------------------------------------------------------------------------------------------------------------------------------------------------------------------------------------------------------------------------------------------------------------------------------------------------------------------------------------------------------------------------------------------------------------------------------------------------------------------------------------------------------------------------------------------------------------------------|----------------------------------------------------------------------------------------------------------------------------------------------------------------------------------------------------------------------------------------------------------------------------------------------------------------------------------------------------------------------------------------------------------------------------------------------------------------------------------------------|--|-------------------------------------------------------------------------------------------------------------------------------------------------------------------------------------------------------------------------------------------------------------------------------------------------------------------------------------------------------------------------------------------------------------------------------------------------------------------------------------------------------------------------------------------------------------------------------------------------------|
|  | <p>Lavage (BAL)**: Can be performed to look for infectious agents or other causes of pneumonitis. It may show increased lymphocytes in ICI pneumonitis, but this is not specific.</p> <p>5. <b>**Lung Biopsy**</b>:<br/>- Although often not required, in ambiguous cases where the diagnosis remains uncertain, a tissue biopsy (either via transbronchial biopsy or surgical lung biopsy) might be considered. Histopathological findings can be diverse but often show evidence of interstitial pneumonitis.</p> <p>6. <b>**Other Investigations**</b>:<br/>- <b>**Electrocardiogram (ECG) and Echocardiogram**</b>: Useful if there's suspicion of cardiac involvement or to rule out cardiac causes of symptoms.<br/>- <b>**Ventilation-Perfusion (VO) Scan or CT Pulmonary Angiogram**</b>: If pulmonary embolism is suspected.</p> <p>7. <b>**Bronchoscopy**</b>:<br/>- Useful to rule out infections (especially opportunistic infections), malignancy, or hemorrhage as a cause of symptoms.</p> <p>When assessing patients for ICI pneumonitis, it's critical to differentiate it from other conditions like infections, drug toxicities, radiation pneumonitis, heart failure, and pulmonary embolism. Collaborative evaluation with a pulmonologist and radiologist can provide valuable insight into diagnosis and management.</p> | <p>8. <b>**Hypersensitivity Pneumonitis**</b>: An allergic lung reaction to inhaled particles or fumes.</p> <p>9. <b>**Cryptogenic Organizing Pneumonia (COP)**</b>: Presents with cough, dyspnea, and fever with characteristic patchy infiltrates on imaging.</p> <p>10. <b>**Lymphangitic Carcinomatosis**</b>: Tumor spread along the lymphatics of the lungs can mimic ICI pneumonitis on imaging.</p> <p>11. <b>**Acute Respiratory Distress Syndrome (ARDS)**</b>: A severe inflammatory lung condition that can be triggered by various causes, such as infections, trauma, or aspiration.</p> <p>12. <b>**Sarcoidosis**</b>: Granulomatous disease that primarily affects the lungs but can involve other organs.</p> <p>13. <b>**Pulmonary Alveolar Proteinosis**</b>: A rare condition where a proteinaceous material accumulates in the alveoli.</p> <p>14. <b>**Other Lung Conditions**</b>: Like pulmonary alveolar hemorrhage, pulmonary edema from other causes, or eosinophilic pneumonia.</p> <p>Given the broad differential diagnosis for pneumonitis, a comprehensive evaluation, including history, physical examination, laboratory tests, imaging, and possibly lung biopsy, is crucial. Properly identifying the cause will guide the appropriate treatment strategy and management plan.</p> | <p>pneumonitis, ICIs are typically permanently discontinued.</p> <p>Given the potential risks and benefits of ICIs, the decision to continue or discontinue therapy should be individualized and based on a thorough assessment of the clinical situation. Collaboration with pulmonologists and oncologists is crucial for optimal decision-making. Always refer to current clinical guidelines when making decisions regarding the management of suspected ICI-associated pneumonitis.</p> |  | <p>compromise.</p> <p>7. <b>**Monitoring**</b>:<br/>- Regularly assess the patient's respiratory status and oxygenation.<br/>- Monitor for potential complications and side effects of the medications used.</p> <p>It's crucial to work closely with pulmonologists when managing refractory ICI-associated pneumonitis. Decisions on additional therapy should be individualized, considering the patient's overall health, potential drug interactions, and the severity of the pneumonitis. As with all irAEs, always stay updated with the latest clinical guidelines and research findings.</p> |
|--|-------------------------------------------------------------------------------------------------------------------------------------------------------------------------------------------------------------------------------------------------------------------------------------------------------------------------------------------------------------------------------------------------------------------------------------------------------------------------------------------------------------------------------------------------------------------------------------------------------------------------------------------------------------------------------------------------------------------------------------------------------------------------------------------------------------------------------------------------------------------------------------------------------------------------------------------------------------------------------------------------------------------------------------------------------------------------------------------------------------------------------------------------------------------------------------------------------------------------------------------------------------------------------------------------------------------------------------------------|------------------------------------------------------------------------------------------------------------------------------------------------------------------------------------------------------------------------------------------------------------------------------------------------------------------------------------------------------------------------------------------------------------------------------------------------------------------------------------------------------------------------------------------------------------------------------------------------------------------------------------------------------------------------------------------------------------------------------------------------------------------------------------------------------------------------------------------------------------------------------------------------------------------------------------------------------------------------------------------------------------------------------------------------------------------------------------------------------------------------------------------------------------------------------------------------------------------------------------------------------------------------------------------------------------------------|----------------------------------------------------------------------------------------------------------------------------------------------------------------------------------------------------------------------------------------------------------------------------------------------------------------------------------------------------------------------------------------------------------------------------------------------------------------------------------------------|--|-------------------------------------------------------------------------------------------------------------------------------------------------------------------------------------------------------------------------------------------------------------------------------------------------------------------------------------------------------------------------------------------------------------------------------------------------------------------------------------------------------------------------------------------------------------------------------------------------------|



| Question                  | Dermatitis                                                                                                                                                                                                                                                                                                                                                                                                                                                                                                                                                                                                                                                                                                                                                                                                                                                                                                                                                                                                                                                                                                                                                                                                                                                                                                                                                                                                                                                                                                                                                                                                                                                                            | Dermatitis                                                                                                                                                                                                                                                                                                                                                                                                                                                                                                                                                                                                                                                                                                                                                                                                                                                                                                                                                                                                                                                                                                                                                                                                                                                                                                                                                                                                                                                                                                                                                                                                                                                                                                                                                                                                                                                                                                                                                | Dermatitis                                                                                                                                                                                                                                                                                                                                                                                                                                                                                                                                                                                                                                                                                                                                                                                                                                                                                                                                                                                                                                                                                                                                                                                                                                                                                                                                                                                                                                                                                                                                                                                                                                                                                                                                                                                                                                                                                                        | Dermatitis                                                                                                                                                                                                                                                                                                                                                                                                                                                                                                                                                                                                                                                                                                                                                                                                                                                                                                                                                                                                                                                                                                                                                                                                                                                                                                                                                                                                                                                                                                                                                                                                                                                                                                                                                                                                                                                                                                                     | Dermatitis                                                                                                                                                                                                                                                                                                                                                                                                                                                                                                                                                                                                                                                                                                                                                                                                                                                                                                                                                                                                                                                                                                                                                                                                                                                                                                                                                                                                                                                                                                                                                                                                                                                                                                                                                                                                                                                                                                                                                                                                                                                                                                                                                                                                                                                                                     |
|---------------------------|---------------------------------------------------------------------------------------------------------------------------------------------------------------------------------------------------------------------------------------------------------------------------------------------------------------------------------------------------------------------------------------------------------------------------------------------------------------------------------------------------------------------------------------------------------------------------------------------------------------------------------------------------------------------------------------------------------------------------------------------------------------------------------------------------------------------------------------------------------------------------------------------------------------------------------------------------------------------------------------------------------------------------------------------------------------------------------------------------------------------------------------------------------------------------------------------------------------------------------------------------------------------------------------------------------------------------------------------------------------------------------------------------------------------------------------------------------------------------------------------------------------------------------------------------------------------------------------------------------------------------------------------------------------------------------------|-----------------------------------------------------------------------------------------------------------------------------------------------------------------------------------------------------------------------------------------------------------------------------------------------------------------------------------------------------------------------------------------------------------------------------------------------------------------------------------------------------------------------------------------------------------------------------------------------------------------------------------------------------------------------------------------------------------------------------------------------------------------------------------------------------------------------------------------------------------------------------------------------------------------------------------------------------------------------------------------------------------------------------------------------------------------------------------------------------------------------------------------------------------------------------------------------------------------------------------------------------------------------------------------------------------------------------------------------------------------------------------------------------------------------------------------------------------------------------------------------------------------------------------------------------------------------------------------------------------------------------------------------------------------------------------------------------------------------------------------------------------------------------------------------------------------------------------------------------------------------------------------------------------------------------------------------------------|-------------------------------------------------------------------------------------------------------------------------------------------------------------------------------------------------------------------------------------------------------------------------------------------------------------------------------------------------------------------------------------------------------------------------------------------------------------------------------------------------------------------------------------------------------------------------------------------------------------------------------------------------------------------------------------------------------------------------------------------------------------------------------------------------------------------------------------------------------------------------------------------------------------------------------------------------------------------------------------------------------------------------------------------------------------------------------------------------------------------------------------------------------------------------------------------------------------------------------------------------------------------------------------------------------------------------------------------------------------------------------------------------------------------------------------------------------------------------------------------------------------------------------------------------------------------------------------------------------------------------------------------------------------------------------------------------------------------------------------------------------------------------------------------------------------------------------------------------------------------------------------------------------------------|--------------------------------------------------------------------------------------------------------------------------------------------------------------------------------------------------------------------------------------------------------------------------------------------------------------------------------------------------------------------------------------------------------------------------------------------------------------------------------------------------------------------------------------------------------------------------------------------------------------------------------------------------------------------------------------------------------------------------------------------------------------------------------------------------------------------------------------------------------------------------------------------------------------------------------------------------------------------------------------------------------------------------------------------------------------------------------------------------------------------------------------------------------------------------------------------------------------------------------------------------------------------------------------------------------------------------------------------------------------------------------------------------------------------------------------------------------------------------------------------------------------------------------------------------------------------------------------------------------------------------------------------------------------------------------------------------------------------------------------------------------------------------------------------------------------------------------------------------------------------------------------------------------------------------------|------------------------------------------------------------------------------------------------------------------------------------------------------------------------------------------------------------------------------------------------------------------------------------------------------------------------------------------------------------------------------------------------------------------------------------------------------------------------------------------------------------------------------------------------------------------------------------------------------------------------------------------------------------------------------------------------------------------------------------------------------------------------------------------------------------------------------------------------------------------------------------------------------------------------------------------------------------------------------------------------------------------------------------------------------------------------------------------------------------------------------------------------------------------------------------------------------------------------------------------------------------------------------------------------------------------------------------------------------------------------------------------------------------------------------------------------------------------------------------------------------------------------------------------------------------------------------------------------------------------------------------------------------------------------------------------------------------------------------------------------------------------------------------------------------------------------------------------------------------------------------------------------------------------------------------------------------------------------------------------------------------------------------------------------------------------------------------------------------------------------------------------------------------------------------------------------------------------------------------------------------------------------------------------------|
| Question                  | What is the primary treatment for localized rash on the torso associated with immune checkpoint inhibitors?                                                                                                                                                                                                                                                                                                                                                                                                                                                                                                                                                                                                                                                                                                                                                                                                                                                                                                                                                                                                                                                                                                                                                                                                                                                                                                                                                                                                                                                                                                                                                                           | When should systemic steroids be considered for immune checkpoint inhibitor associated dermatitis?                                                                                                                                                                                                                                                                                                                                                                                                                                                                                                                                                                                                                                                                                                                                                                                                                                                                                                                                                                                                                                                                                                                                                                                                                                                                                                                                                                                                                                                                                                                                                                                                                                                                                                                                                                                                                                                        | What are life-threatening immune checkpoint inhibitor skin conditions?                                                                                                                                                                                                                                                                                                                                                                                                                                                                                                                                                                                                                                                                                                                                                                                                                                                                                                                                                                                                                                                                                                                                                                                                                                                                                                                                                                                                                                                                                                                                                                                                                                                                                                                                                                                                                                            | Are there situations where immune checkpoint inhibitors can be continued even if dermatitis is suspected?                                                                                                                                                                                                                                                                                                                                                                                                                                                                                                                                                                                                                                                                                                                                                                                                                                                                                                                                                                                                                                                                                                                                                                                                                                                                                                                                                                                                                                                                                                                                                                                                                                                                                                                                                                                                                      | What are treatments for patients who have pruritus without rash from immune checkpoint inhibitors?                                                                                                                                                                                                                                                                                                                                                                                                                                                                                                                                                                                                                                                                                                                                                                                                                                                                                                                                                                                                                                                                                                                                                                                                                                                                                                                                                                                                                                                                                                                                                                                                                                                                                                                                                                                                                                                                                                                                                                                                                                                                                                                                                                                             |
| Answer Engine 1 (ChatGPT) | <p>Localized rash on the torso or other parts of the body is a common immune-related adverse event (irAE) associated with immune checkpoint inhibitors (ICIs). The primary treatment approach is typically based on the severity of the rash:</p> <p>1. <b>Mild Rash (Grade 1)**:</b></p> <ul style="list-style-type: none"> <li>- Characterized by limited, non-painful, and non-pruritic erythema.</li> <li>- <b>Topical Corticosteroids**:</b> Mild-to-moderate potency corticosteroid creams or ointments, such as hydrocortisone 1% or triamcinolone 0.1%, applied once or twice daily to the affected area.</li> <li>- <b>Emollients**:</b> Moisturizers can help soothe the skin and reduce dryness or scaling.</li> <li>- <b>Antihistamines**:</b> Oral antihistamines like cetirizine or diphenhydramine can be helpful if there's itching.</li> <li>- Typically, ICI therapy can be continued without interruption for Grade 1 rash.</li> </ul> <p>2. <b>Moderate Rash (Grade 2)**:</b></p> <ul style="list-style-type: none"> <li>- More extensive erythema, potential mild desquamation (skin peeling), and pruritus.</li> <li>- <b>Topical Corticosteroids**:</b> More potent topical corticosteroids, such as betamethasone or clobetasol, may be needed.</li> <li>- <b>Oral Corticosteroids**:</b> Consideration can be given to short courses of oral corticosteroids, such as prednisone, especially if the rash is not improving with topical treatments alone.</li> <li>- <b>Antihistamines**:</b> To manage itching.</li> <li>- <b>ICI therapy</b> may be temporarily held** depending on the severity and extent of the rash, and clinical judgement.</li> </ul> | <p>Systemic steroids are considered for immune checkpoint inhibitor (ICI)-associated dermatitis based on the severity of the skin reaction. Here's a general guideline:</p> <p>1. <b>Mild Dermatitis (Grade 1)**:</b></p> <ul style="list-style-type: none"> <li>- Typically characterized by a limited rash, which is not painful or pruritic.</li> <li>- <b>Management**:</b> Usually managed with topical corticosteroids and emollients. Systemic steroids are not typically needed.</li> </ul> <p>2. <b>Moderate Dermatitis (Grade 2)**:</b></p> <ul style="list-style-type: none"> <li>- More extensive rash, potential mild desquamation (skin peeling), and pruritus.</li> <li>- <b>Management**:</b> Initial treatment often involves topical corticosteroids. However, if the rash is widespread, progressively worsening, or not responding to topical treatments, short courses of systemic steroids, such as prednisone, can be considered.</li> </ul> <p>3. <b>Severe (Grade 3) or Life-Threatening (Grade 4) Dermatitis**:</b></p> <ul style="list-style-type: none"> <li>- Grade 3 dermatitis involves more than 30% body surface area, may have associated symptoms like pain or blistering, and can significantly affect daily activities.</li> <li>- Grade 4 dermatitis is a rare, life-threatening situation and may involve extensive skin sloughing, resembling conditions like toxic epidermal necrolysis.</li> <li>- <b>Management**:</b> Both require prompt initiation of systemic corticosteroids. Typically, prednisone or its equivalent is started at a dose of 1 to 2 mg/kg/day. For Grade 4 reactions, hospitalization is usually necessary, and patients may require management in a burn unit or intensive care unit.</li> </ul> <p>A few additional points to consider:</p> <ul style="list-style-type: none"> <li>- Before starting systemic steroids, it's essential to rule out infectious causes of the</li> </ul> | <p>Certain skin reactions associated with immune checkpoint inhibitors (ICIs) can be life-threatening. While most skin-related immune-related adverse events (irAEs) from ICIs are mild to moderate in severity, there are some severe conditions that require urgent intervention. Here are some of the life-threatening skin conditions associated with ICIs:</p> <p>1. <b>Stevens-Johnson Syndrome (SJS) and Toxic Epidermal Necrolysis (TEN)**:</b></p> <ul style="list-style-type: none"> <li>- These are severe skin reactions characterized by widespread erythema, blistering, and detachment of the epidermis.</li> <li>- TEN is considered more severe than SJS, with a greater percentage of body surface area affected.</li> <li>- Mucosal involvement is common, especially the eyes, mouth, and genitals.</li> <li>- The mortality rate, especially for TEN, is significant.</li> </ul> <p>2. <b>Drug Rash with Eosinophilia and Systemic Symptoms (DRESS)**:</b></p> <ul style="list-style-type: none"> <li>- DRESS is a hypersensitivity reaction that presents with a rash, fever, lymphadenopathy, and internal organ involvement, especially liver, kidneys, and lungs.</li> <li>- Eosinophilia and atypical lymphocytes may be present in the blood.</li> <li>- It has a prolonged course and can be fatal if not recognized and treated promptly.</li> </ul> <p>3. <b>Generalized Bullous Disorders**:</b></p> <ul style="list-style-type: none"> <li>- Conditions such as bullous pemphigoid or pemphigus can be exacerbated or induced by ICIs.</li> <li>- These conditions are characterized by the formation of fluid-filled blisters on the skin and mucous membranes.</li> </ul> <p>4. <b>Acute Generalized Exanthematous Pustulosis (AGEP)**:</b></p> <ul style="list-style-type: none"> <li>- Characterized by the sudden appearance of many sterile, small pustules on a</li> </ul> | <p>The decision to continue or withhold immune checkpoint inhibitors (ICIs) when dermatitis is suspected largely depends on the severity of the dermatitis and the overall clinical context. Here's a general approach based on the severity:</p> <p>1. <b>Mild Dermatitis (Grade 1)**:</b></p> <ul style="list-style-type: none"> <li>- Characterized by a limited rash, which is not painful or pruritic.</li> <li>- <b>Management**:</b> ICIs can often be continued with close monitoring. Topical corticosteroids and emollients are typically sufficient for management. However, frequent assessment of the rash is essential to ensure there isn't progression. If any worsening in symptoms or extent of the rash occurs, reconsideration of ICI treatment might be needed.</li> </ul> <p>2. <b>Moderate Dermatitis (Grade 2)**:</b></p> <ul style="list-style-type: none"> <li>- More extensive rash, potential mild desquamation (skin peeling), and pruritus.</li> <li>- <b>Management**:</b> ICIs may be temporarily held depending on the extent and severity of the rash. A thorough evaluation is done to ascertain the cause of the dermatitis. If ICI-induced dermatitis is confirmed or highly suspected, treatment with topical and possibly systemic corticosteroids may be initiated. ICIs might be resumed once the rash improves, depending on the clinical context and a multidisciplinary discussion.</li> </ul> <p>3. <b>Severe (Grade 3) or Life-Threatening (Grade 4) Dermatitis**:</b></p> <ul style="list-style-type: none"> <li>- Severe involvement, pain, blistering, or other significant symptoms.</li> <li>- <b>Management**:</b> ICIs are generally discontinued, at least temporarily, and high-dose corticosteroids are initiated. For life-threatening reactions, such as Stevens-Johnson Syndrome or Toxic Epidermal Necrolysis, ICIs are often permanently discontinued.</li> </ul> | <p>Pruritus (itching) without a visible rash is a known side effect of immune checkpoint inhibitors (ICIs). Its management is primarily symptomatic, aiming to alleviate the itching and improve the patient's quality of life. Here are some treatments for pruritus without rash associated with ICIs:</p> <p>1. <b>Skin Care Measures**:</b></p> <ul style="list-style-type: none"> <li>- <b>Moisturizers**:</b> Regular application of emollients helps maintain skin hydration and can reduce itching. Fragrance-free moisturizers are preferable.</li> <li>- <b>Bathing**:</b> Use lukewarm water and mild, hypoallergenic soap. Avoid prolonged hot showers, which can exacerbate itching.</li> <li>- <b>Avoid Irritants**:</b> Fragrances, alcohol-based products, and other potential skin irritants should be avoided.</li> </ul> <p>2. <b>Antihistamines**:</b></p> <ul style="list-style-type: none"> <li>- <b>First-Generation Antihistamines**:</b> Such as diphenhydramine (Benadryl) or hydroxyzine can help reduce itching. However, they may cause drowsiness and are usually taken at night.</li> <li>- <b>Second-Generation Antihistamines**:</b> Such as cetirizine (Zyrtec) or loratadine (Claritin) are less sedating and can be used during the day.</li> </ul> <p>3. <b>Systemic Therapies**:</b></p> <ul style="list-style-type: none"> <li>- If pruritus is severe and doesn't respond to antihistamines, other systemic treatments can be considered:</li> <li>- <b>Corticosteroids**:</b> Short courses of oral prednisone may be used for severe itching.</li> <li>- <b>Gabapentin or Pregabalin**:</b> Originally used for neuropathic pain, these medications can help reduce pruritus in some patients.</li> <li>- <b>Serotonin Reuptake Inhibitors (SSRIs)**:</b> Such as paroxetine or mirtazapine, have been used off-label to treat pruritus in some settings.</li> </ul> <p>4. <b>Topical Therapies**:</b></p> <ul style="list-style-type: none"> <li>- <b>Topical Steroids**:</b> Mild corticosteroid creams or ointments can be tried, even in the absence of a visible rash, to alleviate itching.</li> <li>- <b>Cooling Agents**:</b> Products containing menthol or camphor can provide a cooling sensation, temporarily relieving itch.</li> </ul> |

|  |                                                                                                                                                                                                                                                                                                                                                                                                                                                                                                                                                                                                                                                                                                                                                                                                                          |                                                                                                                                                                                                                                                                                                                                                                                                                                                                                                                                                                                                                                                                              |                                                                                                                                                                                                                                                                                                                                                                                                                                                                                                                                                                                                                                                                                                                                                                                                                                                                                                                                                                                                                                                                                   |                                                                                                                                                                                                                                                                                                                                                                                                                                                                                                                                                                                                                                                                                                                                                                                                                              |                                                                                                                                                                                                                                                                                                                                                                                                                                                                                                                                                                                                                                                                                                                                                                                                                                                                                                                                                                                                                                 |
|--|--------------------------------------------------------------------------------------------------------------------------------------------------------------------------------------------------------------------------------------------------------------------------------------------------------------------------------------------------------------------------------------------------------------------------------------------------------------------------------------------------------------------------------------------------------------------------------------------------------------------------------------------------------------------------------------------------------------------------------------------------------------------------------------------------------------------------|------------------------------------------------------------------------------------------------------------------------------------------------------------------------------------------------------------------------------------------------------------------------------------------------------------------------------------------------------------------------------------------------------------------------------------------------------------------------------------------------------------------------------------------------------------------------------------------------------------------------------------------------------------------------------|-----------------------------------------------------------------------------------------------------------------------------------------------------------------------------------------------------------------------------------------------------------------------------------------------------------------------------------------------------------------------------------------------------------------------------------------------------------------------------------------------------------------------------------------------------------------------------------------------------------------------------------------------------------------------------------------------------------------------------------------------------------------------------------------------------------------------------------------------------------------------------------------------------------------------------------------------------------------------------------------------------------------------------------------------------------------------------------|------------------------------------------------------------------------------------------------------------------------------------------------------------------------------------------------------------------------------------------------------------------------------------------------------------------------------------------------------------------------------------------------------------------------------------------------------------------------------------------------------------------------------------------------------------------------------------------------------------------------------------------------------------------------------------------------------------------------------------------------------------------------------------------------------------------------------|---------------------------------------------------------------------------------------------------------------------------------------------------------------------------------------------------------------------------------------------------------------------------------------------------------------------------------------------------------------------------------------------------------------------------------------------------------------------------------------------------------------------------------------------------------------------------------------------------------------------------------------------------------------------------------------------------------------------------------------------------------------------------------------------------------------------------------------------------------------------------------------------------------------------------------------------------------------------------------------------------------------------------------|
|  | <p>For both mild and moderate rashes, it's also essential to:</p> <ul style="list-style-type: none"> <li>- Avoid skin irritants.</li> <li>- Use gentle, hypoallergenic skin cleansers.</li> <li>- Protect the skin from excessive sun exposure, as ICIs can make the skin more sensitive to the sun.</li> </ul> <p>If the rash doesn't improve with the above treatments or if it's more severe (Grade 3 or 4) involving pain, blistering, or other concerning symptoms, a more aggressive approach is needed, including higher doses of oral corticosteroids and consultation with a dermatologist. In severe cases, permanent discontinuation of ICI therapy may be necessary.</p> <p>In any case, proper evaluation to rule out other causes of the rash, such as infections or other drug reactions, is crucial.</p> | <p>rash, especially if the presentation is atypical.</p> <ul style="list-style-type: none"> <li>- Systemic steroids should be tapered gradually over several weeks, monitoring for recurrence or flare of the dermatitis.</li> <li>- In cases of severe or refractory dermatitis, consultation with a dermatologist is crucial.</li> <li>- Depending on the severity and persistence of the dermatitis, ICI therapy may need to be withheld temporarily or permanently.</li> </ul> <p>Lastly, always refer to the most current clinical guidelines when managing ICI-associated dermatitis, as recommendations may evolve with ongoing research and clinical experience.</p> | <p>background of red skin.</p> <ul style="list-style-type: none"> <li>- Often accompanied by fever and elevated white blood cell count.</li> </ul> <p>While these severe skin reactions are relatively rare, early recognition and intervention are crucial. If any of these conditions are suspected:</p> <ul style="list-style-type: none"> <li>- Discontinue the ICI immediately.</li> <li>- Initiate high-dose systemic corticosteroids and consider other immunosuppressive agents as needed.</li> <li>- Hospitalize the patient, potentially in a burn unit or intensive care unit for severe SJS/TEN.</li> <li>- Involve a dermatologist urgently for assessment and management guidance.</li> <li>- Consider additional supportive measures, such as wound care for skin lesions, eye care for ocular involvement, and monitoring and treatment of organ involvement.</li> </ul> <p>Overall, while ICIs have transformed the landscape of cancer treatment, they come with a unique set of side effects, and vigilance in monitoring and managing irAEs is essential.</p> | <p>A few key points to consider:</p> <ul style="list-style-type: none"> <li>- It's crucial to differentiate ICI-induced dermatitis from other causes, especially infections, before making decisions about ICI therapy.</li> <li>- Collaboration with a dermatologist can provide valuable insights into diagnosis and management.</li> <li>- The potential risks and benefits of continuing ICIs should be weighed carefully, taking into account the severity of the cancer being treated, previous responses to therapy, available alternative treatments, and the patient's overall health and preferences.</li> </ul> <p>In all situations, always consult current clinical guidelines and consider the most recent evidence when making decisions regarding the management of suspected ICI-associated dermatitis.</p> | <p>5. <b>**Phototherapy**</b>:</p> <ul style="list-style-type: none"> <li>- Narrowband ultraviolet B (UVB) phototherapy can be effective in reducing pruritus, though it's more commonly used for pruritus associated with specific skin conditions.</li> </ul> <p>6. <b>**Bile Acid Sequestrants**</b>:</p> <ul style="list-style-type: none"> <li>- In cases where liver enzymes are elevated and there's suspicion of cholestasis, agents like cholestyramine can be considered to reduce pruritus, though this scenario is less common with ICIs.</li> </ul> <p>7. <b>**Other Therapies**</b>:</p> <ul style="list-style-type: none"> <li>- Ongoing research might identify other effective treatments for ICI-associated pruritus.</li> </ul> <p>It's essential to regularly monitor the patient's symptoms and reassess treatment efficacy. Collaborating with a dermatologist can provide valuable guidance in managing pruritus, especially if it's persistent or severely impacting the patient's quality of life.</p> |
|--|--------------------------------------------------------------------------------------------------------------------------------------------------------------------------------------------------------------------------------------------------------------------------------------------------------------------------------------------------------------------------------------------------------------------------------------------------------------------------------------------------------------------------------------------------------------------------------------------------------------------------------------------------------------------------------------------------------------------------------------------------------------------------------------------------------------------------|------------------------------------------------------------------------------------------------------------------------------------------------------------------------------------------------------------------------------------------------------------------------------------------------------------------------------------------------------------------------------------------------------------------------------------------------------------------------------------------------------------------------------------------------------------------------------------------------------------------------------------------------------------------------------|-----------------------------------------------------------------------------------------------------------------------------------------------------------------------------------------------------------------------------------------------------------------------------------------------------------------------------------------------------------------------------------------------------------------------------------------------------------------------------------------------------------------------------------------------------------------------------------------------------------------------------------------------------------------------------------------------------------------------------------------------------------------------------------------------------------------------------------------------------------------------------------------------------------------------------------------------------------------------------------------------------------------------------------------------------------------------------------|------------------------------------------------------------------------------------------------------------------------------------------------------------------------------------------------------------------------------------------------------------------------------------------------------------------------------------------------------------------------------------------------------------------------------------------------------------------------------------------------------------------------------------------------------------------------------------------------------------------------------------------------------------------------------------------------------------------------------------------------------------------------------------------------------------------------------|---------------------------------------------------------------------------------------------------------------------------------------------------------------------------------------------------------------------------------------------------------------------------------------------------------------------------------------------------------------------------------------------------------------------------------------------------------------------------------------------------------------------------------------------------------------------------------------------------------------------------------------------------------------------------------------------------------------------------------------------------------------------------------------------------------------------------------------------------------------------------------------------------------------------------------------------------------------------------------------------------------------------------------|

|                           | Thyroid Toxicity                                                                                                                                                                                                                                                                                                                                                                                                                                                                                                                                                                                                                                                                                                                                                                                                                                                                                                                                                                                                                                                                                                                                                                                                                                                                                                                                                                                                                                                                                                                                                                                                                                                                                                                 | Thyroid Toxicity                                                                                                                                                                                                                                                                                                                                                                                                                                                                                                                                                                                                                                                                                                                                                                                                                                                                                                                                                                                                                                                                                                                                                                                                                                                                                                                                                                                                                                                                                                                                                                                                                                                                                                                                                                                                                                                                                                                                                                   | Thyroid Toxicity                                                                                                                                                                                                                                                                                                                                                                                                                                                                                                                                                                                                                                                                                                                                                                                                                                                                                                                                                                                                                                                                                                                                                                                                                                                                                                                                                                                                                                                                                                                                                                                                                                                                                                                                                                                                                                                                                                         | Thyroid Toxicity                                                                                                                                                                                                                                                                                                                                                                                                                                                                                                                                                                                                                                                                                                                                                                                                                                                                                                                                                                                                                                                                                                                                                                                                                                                                                                                                                                                                                                                                                                                                                                                                                                                                                                                                                                                                                                                                                                         | Thyroid Toxicity                                                                                                                                                                                                                                                                                                                                                                                                                                                                                                                                                                                                                                                                                                                                                                                                                                                                                                                                                                                                                                                                                                                                                                                                                                                                                                                                                                                                                                                                                                                                                                                                                                                                                                                                                                                                                                                                                                                                                                                                                                                                                                                                                                                                                                                                                                                                                                         |
|---------------------------|----------------------------------------------------------------------------------------------------------------------------------------------------------------------------------------------------------------------------------------------------------------------------------------------------------------------------------------------------------------------------------------------------------------------------------------------------------------------------------------------------------------------------------------------------------------------------------------------------------------------------------------------------------------------------------------------------------------------------------------------------------------------------------------------------------------------------------------------------------------------------------------------------------------------------------------------------------------------------------------------------------------------------------------------------------------------------------------------------------------------------------------------------------------------------------------------------------------------------------------------------------------------------------------------------------------------------------------------------------------------------------------------------------------------------------------------------------------------------------------------------------------------------------------------------------------------------------------------------------------------------------------------------------------------------------------------------------------------------------|------------------------------------------------------------------------------------------------------------------------------------------------------------------------------------------------------------------------------------------------------------------------------------------------------------------------------------------------------------------------------------------------------------------------------------------------------------------------------------------------------------------------------------------------------------------------------------------------------------------------------------------------------------------------------------------------------------------------------------------------------------------------------------------------------------------------------------------------------------------------------------------------------------------------------------------------------------------------------------------------------------------------------------------------------------------------------------------------------------------------------------------------------------------------------------------------------------------------------------------------------------------------------------------------------------------------------------------------------------------------------------------------------------------------------------------------------------------------------------------------------------------------------------------------------------------------------------------------------------------------------------------------------------------------------------------------------------------------------------------------------------------------------------------------------------------------------------------------------------------------------------------------------------------------------------------------------------------------------------|--------------------------------------------------------------------------------------------------------------------------------------------------------------------------------------------------------------------------------------------------------------------------------------------------------------------------------------------------------------------------------------------------------------------------------------------------------------------------------------------------------------------------------------------------------------------------------------------------------------------------------------------------------------------------------------------------------------------------------------------------------------------------------------------------------------------------------------------------------------------------------------------------------------------------------------------------------------------------------------------------------------------------------------------------------------------------------------------------------------------------------------------------------------------------------------------------------------------------------------------------------------------------------------------------------------------------------------------------------------------------------------------------------------------------------------------------------------------------------------------------------------------------------------------------------------------------------------------------------------------------------------------------------------------------------------------------------------------------------------------------------------------------------------------------------------------------------------------------------------------------------------------------------------------------|--------------------------------------------------------------------------------------------------------------------------------------------------------------------------------------------------------------------------------------------------------------------------------------------------------------------------------------------------------------------------------------------------------------------------------------------------------------------------------------------------------------------------------------------------------------------------------------------------------------------------------------------------------------------------------------------------------------------------------------------------------------------------------------------------------------------------------------------------------------------------------------------------------------------------------------------------------------------------------------------------------------------------------------------------------------------------------------------------------------------------------------------------------------------------------------------------------------------------------------------------------------------------------------------------------------------------------------------------------------------------------------------------------------------------------------------------------------------------------------------------------------------------------------------------------------------------------------------------------------------------------------------------------------------------------------------------------------------------------------------------------------------------------------------------------------------------------------------------------------------------------------------------------------------------|------------------------------------------------------------------------------------------------------------------------------------------------------------------------------------------------------------------------------------------------------------------------------------------------------------------------------------------------------------------------------------------------------------------------------------------------------------------------------------------------------------------------------------------------------------------------------------------------------------------------------------------------------------------------------------------------------------------------------------------------------------------------------------------------------------------------------------------------------------------------------------------------------------------------------------------------------------------------------------------------------------------------------------------------------------------------------------------------------------------------------------------------------------------------------------------------------------------------------------------------------------------------------------------------------------------------------------------------------------------------------------------------------------------------------------------------------------------------------------------------------------------------------------------------------------------------------------------------------------------------------------------------------------------------------------------------------------------------------------------------------------------------------------------------------------------------------------------------------------------------------------------------------------------------------------------------------------------------------------------------------------------------------------------------------------------------------------------------------------------------------------------------------------------------------------------------------------------------------------------------------------------------------------------------------------------------------------------------------------------------------------------|
| Question                  | What is the primary treatment for thyroiditis associated with immune checkpoint inhibitors?                                                                                                                                                                                                                                                                                                                                                                                                                                                                                                                                                                                                                                                                                                                                                                                                                                                                                                                                                                                                                                                                                                                                                                                                                                                                                                                                                                                                                                                                                                                                                                                                                                      | What is the primary treatment for hypothyroidism associated with immune checkpoint inhibitors?                                                                                                                                                                                                                                                                                                                                                                                                                                                                                                                                                                                                                                                                                                                                                                                                                                                                                                                                                                                                                                                                                                                                                                                                                                                                                                                                                                                                                                                                                                                                                                                                                                                                                                                                                                                                                                                                                     | Should immune checkpoint inhibitors be discontinued for hypothyroidism?                                                                                                                                                                                                                                                                                                                                                                                                                                                                                                                                                                                                                                                                                                                                                                                                                                                                                                                                                                                                                                                                                                                                                                                                                                                                                                                                                                                                                                                                                                                                                                                                                                                                                                                                                                                                                                                  | When should thyroid hormone therapy be initiated for immune checkpoint inhibitor associated hypothyroid and at what dose?                                                                                                                                                                                                                                                                                                                                                                                                                                                                                                                                                                                                                                                                                                                                                                                                                                                                                                                                                                                                                                                                                                                                                                                                                                                                                                                                                                                                                                                                                                                                                                                                                                                                                                                                                                                                | How often should thyroid laboratory assessment be performed in patients receiving immune checkpoint inhibitors?                                                                                                                                                                                                                                                                                                                                                                                                                                                                                                                                                                                                                                                                                                                                                                                                                                                                                                                                                                                                                                                                                                                                                                                                                                                                                                                                                                                                                                                                                                                                                                                                                                                                                                                                                                                                                                                                                                                                                                                                                                                                                                                                                                                                                                                                          |
| Answer Engine 1 (ChatGPT) | <p>Thyroiditis associated with immune checkpoint inhibitors (ICIs) can manifest in various ways, leading either to hyperthyroidism or hypothyroidism, depending on the phase and severity of the thyroiditis. The treatment approach is tailored based on the specific thyroid dysfunction:</p> <ol style="list-style-type: none"> <li><b>Hyperthyroidism Phase (Initial phase)**:</b> <ul style="list-style-type: none"> <li>This initial phase results from the destructive thyroiditis and release of preformed thyroid hormone into circulation.</li> <li><b>Symptomatic Treatment**:</b> Beta-blockers, like propranolol or atenolol, can be used to manage symptoms such as palpitations, tremors, and anxiety.</li> <li><b>Monitoring**:</b> Regular thyroid function tests (TFTs) should be performed to monitor the evolution of thyroiditis, as many patients transition from the hyperthyroid phase to the hypothyroid phase.</li> <li><b>Antithyroid Drugs**:</b> Medications like methimazole or propylthiouracil are generally not used because the hyperthyroidism is caused by inflammation and destruction rather than overproduction of thyroid hormone.</li> </ul> </li> <li><b>Hypothyroidism Phase (Subsequent phase)**:</b> <ul style="list-style-type: none"> <li>This phase may follow the initial hyperthyroid phase or can occur directly without a noticeable hyperthyroid phase.</li> <li><b>Levothyroxine**:</b> If the patient becomes hypothyroid, they will need thyroid hormone replacement with levothyroxine. The dose is adjusted based on regular monitoring of TFTs to maintain thyroid-stimulating hormone (TSH) within the target range.</li> <li><b>Lifetime</b></li> </ul> </li> </ol> | <p>The primary treatment for hypothyroidism associated with immune checkpoint inhibitors (ICIs) is thyroid hormone replacement. Here's the general approach:</p> <ol style="list-style-type: none"> <li><b>Levothyroxine**:</b> <ul style="list-style-type: none"> <li>This is the standard treatment for hypothyroidism, regardless of the cause.</li> <li>The initial dose is typically based on the patient's weight, age, cardiac status, and the severity of hypothyroidism. For most adults, the starting dose is usually between 50 to 100 mcg daily.</li> <li>Regular monitoring of thyroid function tests (especially TSH) is essential to adjust the dose and ensure the patient reaches and maintains euthyroid status.</li> <li>Once the appropriate dose is determined and the TSH is stabilized within the target range, monitoring can be less frequent, such as every 6-12 months.</li> </ul> </li> <li><b>Symptom Management**:</b> <ul style="list-style-type: none"> <li>Symptoms of hypothyroidism, such as fatigue, cold intolerance, weight gain, and constipation, should improve as levothyroxine replacement therapy normalizes thyroid hormone levels. It's essential to educate the patient about potential side effects of overtreatment, like palpitations or osteoporosis.</li> </ul> </li> <li><b>Regular Monitoring**:</b> <ul style="list-style-type: none"> <li>It's essential to conduct regular thyroid function tests (TSH and free T4) to ensure appropriate dosing of levothyroxine. The frequency of monitoring depends on various factors, including the stability of thyroid function and the presence of other comorbidities.</li> <li>Monitoring for other endocrinopathies is also crucial, as ICI use can be associated with multiple gland involvement.</li> </ul> </li> <li><b>Lifelong Treatment and Monitoring**:</b> <ul style="list-style-type: none"> <li>In many cases, hypothyroidism resulting from</li> </ul> </li> </ol> | <p>In most cases, hypothyroidism induced by immune checkpoint inhibitors (ICIs) is manageable, and discontinuation of ICIs is not typically required. Here's the general approach:</p> <ol style="list-style-type: none"> <li><b>Management Over Discontinuation**:</b> <ul style="list-style-type: none"> <li>Hypothyroidism resulting from ICIs is generally treated with thyroid hormone replacement therapy, specifically levothyroxine. Once on replacement therapy, patients can usually continue ICI treatment without interruption.</li> </ul> </li> <li><b>Severity Consideration**:</b> <ul style="list-style-type: none"> <li>While hypothyroidism itself is not typically a reason to discontinue ICIs, the severity of any associated symptoms and the patient's overall clinical picture should be taken into account. For instance, if a patient had symptoms of myxedema coma (a life-threatening complication of severe hypothyroidism), a reassessment of ongoing treatments, including ICIs, would be necessary.</li> </ul> </li> <li><b>Multi-gland Involvement**:</b> <ul style="list-style-type: none"> <li>If the patient develops multiple endocrinopathies due to ICIs (e.g., hypothyroidism along with adrenal insufficiency or hypophysitis), a more in-depth evaluation and discussion about the risks and benefits of continuing ICIs would be warranted.</li> </ul> </li> <li><b>Individualized Decision**:</b> <ul style="list-style-type: none"> <li>The decision to continue or discontinue ICIs should always be individualized, taking into account the type and stage of cancer being treated, the benefits previously observed with the ICI, available alternative treatments, and the patient's overall health and preferences.</li> </ul> </li> <li><b>Multidisciplinary Collaboration**:</b> <ul style="list-style-type: none"> <li>Collaboration between</li> </ul> </li> </ol> | <p>The decision to initiate thyroid hormone therapy for immune checkpoint inhibitor (ICI)-associated hypothyroidism is based on clinical and laboratory findings. Here's a general approach:</p> <ol style="list-style-type: none"> <li><b>Indications for Treatment**:</b> <ul style="list-style-type: none"> <li>Elevated TSH (thyroid-stimulating hormone) levels with low free T4 levels confirm a diagnosis of overt hypothyroidism, which warrants treatment.</li> <li>Symptomatic hypothyroidism, even with mildly elevated TSH levels, may also be an indication for treatment. Symptoms can include fatigue, cold intolerance, weight gain, constipation, dry skin, and cognitive disturbances.</li> <li>Subclinical hypothyroidism (elevated TSH with normal free T4) in the context of ICI use may progress to overt hypothyroidism. Monitoring is essential, and treatment might be considered if TSH is persistently elevated or if the patient is symptomatic.</li> </ul> </li> <li><b>Starting Dose**:</b> <ul style="list-style-type: none"> <li><b>Average Adult**:</b> The typical starting dose of levothyroxine for an otherwise healthy adult is about 1.6 mcg/kg/day. For a 70 kg adult, this translates to a dose of around 100-112 mcg/day.</li> <li><b>Elderly or Cardiovascular Disease**:</b> In elderly patients or those with a history of cardiovascular disease, a lower starting dose, such as 25-50 mcg/day, is recommended to avoid potential cardiac complications.</li> <li><b>Severe Hypothyroidism**:</b> In cases of severe hypothyroidism, a full replacement dose might be initiated right away, but this should be done cautiously, considering the individual's overall health status.</li> </ul> </li> <li><b>Dose Adjustments**:</b> <ul style="list-style-type: none"> <li>Thyroid function tests (primarily TSH) should be checked 6-8 weeks after</li> </ul> </li> </ol> | <p>Regular monitoring of thyroid function is crucial in patients receiving immune checkpoint inhibitors (ICIs) due to the risk of thyroid-related immune-related adverse events (irAEs). Here's a general approach to the frequency of thyroid laboratory assessment in these patients:</p> <ol style="list-style-type: none"> <li><b>Baseline Assessment**:</b> <ul style="list-style-type: none"> <li>Before starting ICIs, a baseline assessment of thyroid function should be done to identify any pre-existing thyroid disorders. Typically, this involves checking the TSH (thyroid-stimulating hormone) and, if indicated, free T4 levels.</li> </ul> </li> <li><b>Regular Monitoring During Treatment**:</b> <ul style="list-style-type: none"> <li>After initiating ICI therapy, thyroid function tests should be performed at regular intervals. The frequency can vary based on clinical guidelines, institutional practices, and the specific ICI being used. Commonly, TSH and free T4 are checked: <ul style="list-style-type: none"> <li>Every 4-6 weeks during the first few months of therapy.</li> <li>Thereafter, every 6-12 weeks or at each ICI infusion cycle.</li> </ul> </li> </ul> </li> <li><b>Monitoring with Clinical Suspicion**:</b> <ul style="list-style-type: none"> <li>If a patient develops symptoms suggestive of thyroid dysfunction (either hypo- or hyperthyroidism), thyroid function tests should be done immediately, regardless of the last assessment date.</li> </ul> </li> <li><b>After Detecting Thyroid Dysfunction**:</b> <ul style="list-style-type: none"> <li>If a patient is found to have thyroid dysfunction, more frequent monitoring might be needed initially, especially if interventions (like thyroid hormone replacement for hypothyroidism) are initiated.</li> <li>For example, in the context of new-onset hypothyroidism, TSH and free T4 might be checked every 4-6 weeks after starting levothyroxine to adjust the dose appropriately. Once stable, the frequency of monitoring can be decreased.</li> </ul> </li> <li><b>After Completion of ICI Therapy**:</b> <ul style="list-style-type: none"> <li>Even after discontinuation of ICIs, patients are still at risk for the development or progression of thyroid dysfunction. It's recommended to continue monitoring thyroid function:</li> </ul> </li> </ol> |

|  |                                                                                                                                                                                                                                                                                                                                                                                                                                                                                                                                                                                                                                                                                                                                                                                                                                                                                                                                                                                                                                                                                                                                                                                                                                                                                                                                               |                                                                                                                                                                                                                                                                                                                                                                                                                                                                                                                                                                                                                                                                                                                                            |                                                                                                                                                                                                                                                                                                                                                                                                                                                                                                                               |                                                                                                                                                                                                                                                                                                                                                                                                                                                                                                                                                                                                                                                                                                                                                                                                                                                                                                                                                                                                                                                                                                                                                    |                                                                                                                                                                                                                                                                                                                                                                                                                                                                                                                                                                                                                                                                                                                                                                                                    |
|--|-----------------------------------------------------------------------------------------------------------------------------------------------------------------------------------------------------------------------------------------------------------------------------------------------------------------------------------------------------------------------------------------------------------------------------------------------------------------------------------------------------------------------------------------------------------------------------------------------------------------------------------------------------------------------------------------------------------------------------------------------------------------------------------------------------------------------------------------------------------------------------------------------------------------------------------------------------------------------------------------------------------------------------------------------------------------------------------------------------------------------------------------------------------------------------------------------------------------------------------------------------------------------------------------------------------------------------------------------|--------------------------------------------------------------------------------------------------------------------------------------------------------------------------------------------------------------------------------------------------------------------------------------------------------------------------------------------------------------------------------------------------------------------------------------------------------------------------------------------------------------------------------------------------------------------------------------------------------------------------------------------------------------------------------------------------------------------------------------------|-------------------------------------------------------------------------------------------------------------------------------------------------------------------------------------------------------------------------------------------------------------------------------------------------------------------------------------------------------------------------------------------------------------------------------------------------------------------------------------------------------------------------------|----------------------------------------------------------------------------------------------------------------------------------------------------------------------------------------------------------------------------------------------------------------------------------------------------------------------------------------------------------------------------------------------------------------------------------------------------------------------------------------------------------------------------------------------------------------------------------------------------------------------------------------------------------------------------------------------------------------------------------------------------------------------------------------------------------------------------------------------------------------------------------------------------------------------------------------------------------------------------------------------------------------------------------------------------------------------------------------------------------------------------------------------------|----------------------------------------------------------------------------------------------------------------------------------------------------------------------------------------------------------------------------------------------------------------------------------------------------------------------------------------------------------------------------------------------------------------------------------------------------------------------------------------------------------------------------------------------------------------------------------------------------------------------------------------------------------------------------------------------------------------------------------------------------------------------------------------------------|
|  | <p>Monitoring**: Even if the hypothyroidism is transient and improves, these patients should have lifelong monitoring of thyroid function, as the hypothyroidism can be permanent or recur later.</p> <p>3. <b>**Monitoring**</b>:<br/>- Regular thyroid function tests (TSH, free T4, and free T3 as needed) are essential to track the course of thyroiditis and adjust treatment as necessary.<br/>- Monitoring for other endocrinopathies is also crucial, as ICI use can be associated with multiple gland involvement.</p> <p>4. <b>**Symptomatic Treatment**</b>:<br/>- Whether in the hyperthyroid or hypothyroid phase, it's essential to address symptoms. For example, beta-blockers for hyperthyroid symptoms or appropriate dosing of levothyroxine for hypothyroid symptoms.</p> <p>5. <b>**ICIs Continuation**</b>:<br/>- The decision to continue or withhold ICIs in the context of thyroiditis depends on the clinical scenario, severity of thyroid dysfunction, presence of other irAEs, and oncological considerations. Often, ICIs can be continued with close monitoring and appropriate management of thyroid dysfunction.</p> <p>Lastly, collaboration with an endocrinologist can provide valuable expertise in managing ICI-associated thyroiditis, ensuring optimal treatment decisions and patient outcomes.</p> | <p>ICI therapy can be permanent. Patients usually require lifelong levothyroxine replacement and periodic monitoring of thyroid function.</p> <p>5. <b>**ICIs Continuation**</b>:<br/>- Generally, ICIs can be continued even if a patient develops hypothyroidism, as long as the condition is appropriately managed with levothyroxine replacement. However, the decision should be individualized based on the overall clinical scenario and discussion between oncologists and endocrinologists.</p> <p>It's beneficial for patients with ICI-associated hypothyroidism to have a consultation with an endocrinologist to guide management, optimize treatment, and monitor for potential complications or other endocrinopathies.</p> | <p>oncologists, endocrinologists, and other specialists is crucial to making informed decisions regarding the continuation of ICI therapy in the context of immune-related adverse events like hypothyroidism.</p> <p>In summary, while hypothyroidism alone is not usually a reason to discontinue ICIs, it's essential to manage and monitor the condition appropriately. The broader clinical context and potential for other immune-related side effects should always be considered when making treatment decisions.</p> | <p>initiating therapy or after any dose adjustment. Based on these results, the levothyroxine dose can be adjusted as necessary to normalize TSH levels.<br/>- Typically, dose adjustments are made in increments of 12.5-25 mcg.</p> <p>4. <b>**Monitoring**</b>:<br/>- After achieving a stable TSH level on a fixed levothyroxine dose, TSH can be checked every 6-12 months or if new symptoms suggestive of thyroid dysfunction arise.<br/>- Remember that levothyroxine has a long half-life, so changes in dosing can take several weeks to reflect in TSH levels.</p> <p>5. <b>**Administration Tips**</b>:<br/>- Levothyroxine should be taken on an empty stomach, usually 30 minutes to an hour before breakfast, for optimal absorption.<br/>- Certain medications and supplements, such as calcium, iron, proton pump inhibitors, and certain antacids, can interfere with levothyroxine absorption and should be taken several hours apart from levothyroxine.</p> <p>In all cases, individualized treatment decisions in collaboration with an endocrinologist will ensure optimal management of ICI-associated hypothyroidism.</p> | <p>- Every 2-3 months for the first year after stopping ICIs.<br/>- Thereafter, every 6-12 months or based on clinical judgment.</p> <p>6. <b>**Consider Other Endocrine irAEs**</b>:<br/>- While monitoring thyroid function, it's also essential to be vigilant about other potential endocrine irAEs, such as hypophysitis or adrenal insufficiency. Appropriate labs should be ordered if there's clinical suspicion.</p> <p>The above recommendations provide a general guideline. Monitoring frequency might need individual adjustment based on the patient's overall clinical picture, presence of other irAEs, and the specific ICI used. Collaboration with an endocrinologist can be invaluable in guiding the monitoring and management of ICI-associated endocrine complications.</p> |
|--|-----------------------------------------------------------------------------------------------------------------------------------------------------------------------------------------------------------------------------------------------------------------------------------------------------------------------------------------------------------------------------------------------------------------------------------------------------------------------------------------------------------------------------------------------------------------------------------------------------------------------------------------------------------------------------------------------------------------------------------------------------------------------------------------------------------------------------------------------------------------------------------------------------------------------------------------------------------------------------------------------------------------------------------------------------------------------------------------------------------------------------------------------------------------------------------------------------------------------------------------------------------------------------------------------------------------------------------------------|--------------------------------------------------------------------------------------------------------------------------------------------------------------------------------------------------------------------------------------------------------------------------------------------------------------------------------------------------------------------------------------------------------------------------------------------------------------------------------------------------------------------------------------------------------------------------------------------------------------------------------------------------------------------------------------------------------------------------------------------|-------------------------------------------------------------------------------------------------------------------------------------------------------------------------------------------------------------------------------------------------------------------------------------------------------------------------------------------------------------------------------------------------------------------------------------------------------------------------------------------------------------------------------|----------------------------------------------------------------------------------------------------------------------------------------------------------------------------------------------------------------------------------------------------------------------------------------------------------------------------------------------------------------------------------------------------------------------------------------------------------------------------------------------------------------------------------------------------------------------------------------------------------------------------------------------------------------------------------------------------------------------------------------------------------------------------------------------------------------------------------------------------------------------------------------------------------------------------------------------------------------------------------------------------------------------------------------------------------------------------------------------------------------------------------------------------|----------------------------------------------------------------------------------------------------------------------------------------------------------------------------------------------------------------------------------------------------------------------------------------------------------------------------------------------------------------------------------------------------------------------------------------------------------------------------------------------------------------------------------------------------------------------------------------------------------------------------------------------------------------------------------------------------------------------------------------------------------------------------------------------------|

|                           | Pituitary/Adrenal Toxicity                                                                                                                                                                                                                                                                                                                                                                                                                                                                                                                                                                                                                                                                                                                                                                                                                                                                                                                                                                                                                                                                                                                                                                                                                                                                                                                                                                                                                                                                                                                                                                                                                                                                                                                              | Pituitary/Adrenal Toxicity                                                                                                                                                                                                                                                                                                                                                                                                                                                                                                                                                                                                                                                                                                                                                                                                                                                                                                                                                                                                                                                                                                                                                                                                                                                                                                                                                                                                                                                                                                                                                                                                                                                                                                                                                                                                                                                                       | Pituitary/Adrenal Toxicity                                                                                                                                                                                                                                                                                                                                                                                                                                                                                                                                                                                                                                                                                                                                                                                                                                                                                                                                                                                                                                                                                                                                                                                                                                                                                                                                                                                                                                                                                                                                                                                                                                                                                                                                                                                                                                                                                                        | Pituitary/Adrenal Toxicity                                                                                                                                                                                                                                                                                                                                                                                                                                                                                                                                                                                                                                                                                                                                                                                                                                                                                                                                                                                                                                                                                                                                                                                                                                                                                                                                                                                                                                                                                                                                                                                                                                                                                                                                                                                                                                                                                                                      | Pituitary/Adrenal Toxicity                                                                                                                                                                                                                                                                                                                                                                                                                                                                                                                                                                                                                                                                                                                                                                                                                                                                                                                                                                                                                                                                                                                                                                                                                                                                                                                                                                                                                                                                                                                                                                                                                                                                                                                                                                                                                                                                                                                                                                                                                                                                                                       |
|---------------------------|---------------------------------------------------------------------------------------------------------------------------------------------------------------------------------------------------------------------------------------------------------------------------------------------------------------------------------------------------------------------------------------------------------------------------------------------------------------------------------------------------------------------------------------------------------------------------------------------------------------------------------------------------------------------------------------------------------------------------------------------------------------------------------------------------------------------------------------------------------------------------------------------------------------------------------------------------------------------------------------------------------------------------------------------------------------------------------------------------------------------------------------------------------------------------------------------------------------------------------------------------------------------------------------------------------------------------------------------------------------------------------------------------------------------------------------------------------------------------------------------------------------------------------------------------------------------------------------------------------------------------------------------------------------------------------------------------------------------------------------------------------|--------------------------------------------------------------------------------------------------------------------------------------------------------------------------------------------------------------------------------------------------------------------------------------------------------------------------------------------------------------------------------------------------------------------------------------------------------------------------------------------------------------------------------------------------------------------------------------------------------------------------------------------------------------------------------------------------------------------------------------------------------------------------------------------------------------------------------------------------------------------------------------------------------------------------------------------------------------------------------------------------------------------------------------------------------------------------------------------------------------------------------------------------------------------------------------------------------------------------------------------------------------------------------------------------------------------------------------------------------------------------------------------------------------------------------------------------------------------------------------------------------------------------------------------------------------------------------------------------------------------------------------------------------------------------------------------------------------------------------------------------------------------------------------------------------------------------------------------------------------------------------------------------|-----------------------------------------------------------------------------------------------------------------------------------------------------------------------------------------------------------------------------------------------------------------------------------------------------------------------------------------------------------------------------------------------------------------------------------------------------------------------------------------------------------------------------------------------------------------------------------------------------------------------------------------------------------------------------------------------------------------------------------------------------------------------------------------------------------------------------------------------------------------------------------------------------------------------------------------------------------------------------------------------------------------------------------------------------------------------------------------------------------------------------------------------------------------------------------------------------------------------------------------------------------------------------------------------------------------------------------------------------------------------------------------------------------------------------------------------------------------------------------------------------------------------------------------------------------------------------------------------------------------------------------------------------------------------------------------------------------------------------------------------------------------------------------------------------------------------------------------------------------------------------------------------------------------------------------|-------------------------------------------------------------------------------------------------------------------------------------------------------------------------------------------------------------------------------------------------------------------------------------------------------------------------------------------------------------------------------------------------------------------------------------------------------------------------------------------------------------------------------------------------------------------------------------------------------------------------------------------------------------------------------------------------------------------------------------------------------------------------------------------------------------------------------------------------------------------------------------------------------------------------------------------------------------------------------------------------------------------------------------------------------------------------------------------------------------------------------------------------------------------------------------------------------------------------------------------------------------------------------------------------------------------------------------------------------------------------------------------------------------------------------------------------------------------------------------------------------------------------------------------------------------------------------------------------------------------------------------------------------------------------------------------------------------------------------------------------------------------------------------------------------------------------------------------------------------------------------------------------------------------------------------------------|----------------------------------------------------------------------------------------------------------------------------------------------------------------------------------------------------------------------------------------------------------------------------------------------------------------------------------------------------------------------------------------------------------------------------------------------------------------------------------------------------------------------------------------------------------------------------------------------------------------------------------------------------------------------------------------------------------------------------------------------------------------------------------------------------------------------------------------------------------------------------------------------------------------------------------------------------------------------------------------------------------------------------------------------------------------------------------------------------------------------------------------------------------------------------------------------------------------------------------------------------------------------------------------------------------------------------------------------------------------------------------------------------------------------------------------------------------------------------------------------------------------------------------------------------------------------------------------------------------------------------------------------------------------------------------------------------------------------------------------------------------------------------------------------------------------------------------------------------------------------------------------------------------------------------------------------------------------------------------------------------------------------------------------------------------------------------------------------------------------------------------|
| Question                  | What are symptoms concerning for immune checkpoint inhibitor associated hypophysitis or hypopituitarism?                                                                                                                                                                                                                                                                                                                                                                                                                                                                                                                                                                                                                                                                                                                                                                                                                                                                                                                                                                                                                                                                                                                                                                                                                                                                                                                                                                                                                                                                                                                                                                                                                                                | What are the main diagnostic tests to assess for immune checkpoint inhibitor associated hypophysitis?                                                                                                                                                                                                                                                                                                                                                                                                                                                                                                                                                                                                                                                                                                                                                                                                                                                                                                                                                                                                                                                                                                                                                                                                                                                                                                                                                                                                                                                                                                                                                                                                                                                                                                                                                                                            | Should immune checkpoint inhibitors be discontinued for hypopituitarism?                                                                                                                                                                                                                                                                                                                                                                                                                                                                                                                                                                                                                                                                                                                                                                                                                                                                                                                                                                                                                                                                                                                                                                                                                                                                                                                                                                                                                                                                                                                                                                                                                                                                                                                                                                                                                                                          | What is the primary treatment for hypophysitis associated with immune checkpoint inhibitors? Please list the dose of any medications                                                                                                                                                                                                                                                                                                                                                                                                                                                                                                                                                                                                                                                                                                                                                                                                                                                                                                                                                                                                                                                                                                                                                                                                                                                                                                                                                                                                                                                                                                                                                                                                                                                                                                                                                                                                            | Can corticosteroid hormone replacement typically be discontinued in patients with immune checkpoint inhibitor associated hypophysitis?                                                                                                                                                                                                                                                                                                                                                                                                                                                                                                                                                                                                                                                                                                                                                                                                                                                                                                                                                                                                                                                                                                                                                                                                                                                                                                                                                                                                                                                                                                                                                                                                                                                                                                                                                                                                                                                                                                                                                                                           |
| Answer Engine 1 (ChatGPT) | <p>Immune checkpoint inhibitor (ICI)-associated hypophysitis refers to inflammation of the pituitary gland and can lead to hypopituitarism, which is a decreased secretion of one or more of the pituitary hormones. This condition can have a variety of symptoms, depending on which hormone or hormones are affected. Here are symptoms concerning for ICI-associated hypophysitis or hypopituitarism:</p> <p>1. <b>General Symptoms of Hypophysitis</b>:</p> <ul style="list-style-type: none"> <li>- Headache: Often described as a dull, persistent pain, localized or diffuse.</li> <li>- Visual disturbances: Such as bitemporal hemianopsia due to compression of the optic chiasm.</li> <li>- Nausea or vomiting.</li> <li>- Fatigue.</li> </ul> <p>2. <b>Adrenocorticotropic Hormone (ACTH) Deficiency</b>:</p> <ul style="list-style-type: none"> <li>- Weakness or fatigue.</li> <li>- Weight loss.</li> <li>- Anorexia.</li> <li>- Nausea, vomiting, or abdominal pain.</li> <li>- Hypotension.</li> <li>- Hyponatremia (low sodium levels).</li> <li>- Hyperkalemia (elevated potassium levels).</li> <li>- Lightheadedness or dizziness.</li> </ul> <p>3. <b>Thyroid-Stimulating Hormone (TSH) Deficiency</b>:</p> <ul style="list-style-type: none"> <li>- Fatigue or lethargy.</li> <li>- Cold intolerance.</li> <li>- Weight gain.</li> <li>- Constipation.</li> <li>- Dry skin.</li> <li>- Bradycardia (slow heart rate).</li> </ul> <p>4. <b>Gonadotropin (Luteinizing Hormone [LH] and Follicle-Stimulating Hormone [FSH]) Deficiency</b>:</p> <ul style="list-style-type: none"> <li>- In women: <ul style="list-style-type: none"> <li>- Amenorrhea (absence of menstruation) or irregular menstruation.</li> </ul> </li> </ul> | <p>The diagnosis of immune checkpoint inhibitor (ICI)-associated hypophysitis involves a combination of clinical assessment, laboratory tests, and imaging studies. Here's an overview of the main diagnostic tests:</p> <p>1. <b>Clinical Assessment</b>:</p> <ul style="list-style-type: none"> <li>- A thorough clinical evaluation of symptoms and physical examination is critical. The presence of headaches, visual disturbances, and symptoms related to hormone deficiencies can provide initial clinical suspicion.</li> </ul> <p>2. <b>Laboratory Tests</b>:</p> <ul style="list-style-type: none"> <li>- <b>Pituitary Hormone Assessment</b>: <ul style="list-style-type: none"> <li>- <b>TSH (Thyroid-Stimulating Hormone)</b> and <b>Free T4</b>: To assess thyroid function. A low TSH in conjunction with a low free T4 can indicate central hypothyroidism.</li> <li>- <b>ACTH (Adrenocorticotropic Hormone)</b> and <b>Serum Cortisol</b>: To assess adrenal function. Morning cortisol levels (usually taken at 8 AM) can provide an initial assessment, with low levels being concerning. An ACTH stimulation test may be required for a definitive diagnosis of adrenal insufficiency.</li> <li>- <b>LH (Luteinizing Hormone)</b>, <b>FSH (Follicle-Stimulating Hormone)</b>, <b>Estradiol</b> (in women), and <b>Testosterone</b> (in men): To evaluate gonadal function.</li> <li>- <b>GH (Growth Hormone)</b> and <b>IGF-1 (Insulin-Like Growth Factor-1)</b>: To assess growth hormone function. This is especially relevant in pediatric patients or those with symptoms suggestive of GH deficiency.</li> <li>- <b>Prolactin</b>: Though prolactin deficiency is rare, levels can be checked, especially if there's concern about breastfeeding in postpartum women.</li> <li>- <b>Antidiuretic Hormone</b></li> </ul> </li> <li>- <b>Serum Osmolality</b></li> </ul> | <p>The decision to discontinue immune checkpoint inhibitors (ICIs) in the setting of hypopituitarism is individualized based on the severity of the condition, the specific pituitary hormone deficiencies, the clinical context, and the underlying cancer's nature and progression. Here's a general approach:</p> <p>1. <b>Mild to Moderate Hypopituitarism</b>:</p> <ul style="list-style-type: none"> <li>- In cases of mild to moderate hypopituitarism, where hormone deficiencies can be adequately replaced (e.g., with levothyroxine for central hypothyroidism or with glucocorticoids for ACTH deficiency), ICIs can often be continued with close monitoring.</li> <li>- Concurrent hormone replacement therapy is initiated and adjusted based on regular monitoring.</li> </ul> <p>2. <b>Severe Hypopituitarism or Complications</b>:</p> <ul style="list-style-type: none"> <li>- In more severe cases, especially if there are complications like visual disturbances from pituitary enlargement or if there's an inability to stabilize the patient with hormone replacement therapy, temporary discontinuation of ICIs may be considered.</li> <li>- The risks of stopping the ICI (potential progression of cancer) versus the benefits (managing and potentially reversing the immune-related adverse event) must be weighed.</li> </ul> <p>3. <b>Other Immune-related Adverse Events</b>:</p> <ul style="list-style-type: none"> <li>- If hypopituitarism coexists with other severe immune-related adverse events, the cumulative impact on the patient's health might lead to discontinuation or a pause in ICI therapy.</li> </ul> <p>4. <b>Individualized Decision Making</b>:</p> <ul style="list-style-type: none"> <li>- The decision to continue or discontinue ICIs should always be individualized, taking into account the expected benefits of the ICI in treating cancer versus the</li> </ul> | <p>The primary treatment for immune checkpoint inhibitor (ICI)-associated hypophysitis is directed at replacing the deficient hormones and managing any associated complications. The specific treatment depends on the hormones that are affected. Here's a general approach:</p> <p>1. <b>Glucocorticoid Replacement for ACTH Deficiency</b>:</p> <ul style="list-style-type: none"> <li>- <b>Hydrocortisone</b>: Typical starting doses are 15-20 mg in the morning and 5-10 mg in the late afternoon. The dose can be adjusted based on clinical response and side effects.</li> <li>- <b>Prednisone</b>: An alternative to hydrocortisone. A typical starting dose is 3-5 mg in the morning.</li> <li>- It's essential to educate patients about "sick day" rules, which involve increasing the glucocorticoid dose during periods of stress, illness, or surgery.</li> </ul> <p>2. <b>Thyroid Hormone Replacement for TSH Deficiency</b>:</p> <ul style="list-style-type: none"> <li>- <b>Levothyroxine</b>: The typical starting dose for an adult is around 1.6 mcg/kg/day. The dose may be adjusted based on TSH and free T4 levels and the clinical response. Elderly patients or those with cardiovascular disease might start at a lower dose (e.g., 25-50 mcg/day).</li> </ul> <p>3. <b>Sex Hormone Replacement for LH/FSH Deficiency</b>:</p> <ul style="list-style-type: none"> <li>- <b>Men</b>: <ul style="list-style-type: none"> <li>- <b>Testosterone Replacement</b>: Options include gels, patches, injections, or implantable pellets. Dosage and frequency vary based on the preparation.</li> <li>- <b>Women</b>: <ul style="list-style-type: none"> <li>- <b>Estrogen and Progesterone Replacement</b>: For premenopausal women. This can be achieved using combined oral contraceptives or hormone replacement therapy.</li> <li>- Postmenopausal women might not require hormone</li> </ul> </li> </ul> </li> </ul> | <p>In patients with immune checkpoint inhibitor (ICI)-associated hypophysitis, the inflammation affects the pituitary gland, leading to potential deficiencies in the hormones it secretes. One of the most commonly affected hormones is ACTH, which stimulates the adrenal glands to produce cortisol, a vital glucocorticoid hormone.</p> <p>If ACTH production is impaired due to hypophysitis, it results in secondary adrenal insufficiency, necessitating glucocorticoid (corticosteroid) replacement, such as hydrocortisone or prednisone.</p> <p>Here's the general approach regarding discontinuation of glucocorticoid replacement in this context:</p> <p>1. <b>Permanent Deficiency</b>: In many cases of ICI-associated hypophysitis, the ACTH deficiency is irreversible, and patients require lifelong glucocorticoid replacement.</p> <p>2. <b>Monitoring and Testing</b>: In some patients, there might be a partial recovery of pituitary function over time. If there's clinical suspicion or desire to assess the recovery of ACTH production: <ul style="list-style-type: none"> <li>- A stimulation test (like the cosyntropin or Synacthen test) can be performed. This test evaluates the adrenal glands' response to synthetic ACTH.</li> <li>- If the adrenal response is adequate, it may indicate that the pituitary gland is producing enough ACTH, and a trial reduction or discontinuation of glucocorticoid replacement might be considered.</li> </ul> </p> <p>3. <b>Cautious Discontinuation</b>: If a decision is made to reduce or discontinue glucocorticoid replacement: <ul style="list-style-type: none"> <li>- It should be done cautiously and gradually to monitor for symptoms of adrenal insufficiency.</li> <li>- Patients should be educated about symptoms of adrenal crisis and the need for emergency glucocorticoid administration in stressful situations, illness, or surgery.</li> </ul> </p> <p>4. <b>High Likelihood of Lifelong Replacement</b>: Despite the potential for some recovery, a significant portion of patients with ICI-associated hypophysitis will</p> |

|                                                                                                                                                                                                                                                                                                                                                                                                                                                                                                                                                                                                                                                                                                                                                                                                                                                                                                                                                                                                                                                                                                                                                                                                                                                                                                                                                                                                                                                                                                                                                                                                                                                         |                                                                                                                                                                                                                                                                                                                                                                                                                                                                                                                                                                                                                                                                                                                                                                                                                                                                                                                                                                                                                                                                                                                                                                                                                                                                                                                                                                                                                                                                                                                                                                             |                                                                                                                                                                                                                                                                                                                                                                                                                                                                                                                                                                                                                                                                                                                                                                                                                                        |                                                                                                                                                                                                                                                                                                                                                                                                                                                                                                                                                                                                                                                                                                                                                                                                                                                                                                                                                                                                                                                                                                                                                                                                                                                                                                                                                                                                                                                                                                                                                                                                                                                                                                                                                                                                                                                                                                                                                                                                                      |                                                                                                                                                                                                                                                                                                                                          |
|---------------------------------------------------------------------------------------------------------------------------------------------------------------------------------------------------------------------------------------------------------------------------------------------------------------------------------------------------------------------------------------------------------------------------------------------------------------------------------------------------------------------------------------------------------------------------------------------------------------------------------------------------------------------------------------------------------------------------------------------------------------------------------------------------------------------------------------------------------------------------------------------------------------------------------------------------------------------------------------------------------------------------------------------------------------------------------------------------------------------------------------------------------------------------------------------------------------------------------------------------------------------------------------------------------------------------------------------------------------------------------------------------------------------------------------------------------------------------------------------------------------------------------------------------------------------------------------------------------------------------------------------------------|-----------------------------------------------------------------------------------------------------------------------------------------------------------------------------------------------------------------------------------------------------------------------------------------------------------------------------------------------------------------------------------------------------------------------------------------------------------------------------------------------------------------------------------------------------------------------------------------------------------------------------------------------------------------------------------------------------------------------------------------------------------------------------------------------------------------------------------------------------------------------------------------------------------------------------------------------------------------------------------------------------------------------------------------------------------------------------------------------------------------------------------------------------------------------------------------------------------------------------------------------------------------------------------------------------------------------------------------------------------------------------------------------------------------------------------------------------------------------------------------------------------------------------------------------------------------------------|----------------------------------------------------------------------------------------------------------------------------------------------------------------------------------------------------------------------------------------------------------------------------------------------------------------------------------------------------------------------------------------------------------------------------------------------------------------------------------------------------------------------------------------------------------------------------------------------------------------------------------------------------------------------------------------------------------------------------------------------------------------------------------------------------------------------------------------|----------------------------------------------------------------------------------------------------------------------------------------------------------------------------------------------------------------------------------------------------------------------------------------------------------------------------------------------------------------------------------------------------------------------------------------------------------------------------------------------------------------------------------------------------------------------------------------------------------------------------------------------------------------------------------------------------------------------------------------------------------------------------------------------------------------------------------------------------------------------------------------------------------------------------------------------------------------------------------------------------------------------------------------------------------------------------------------------------------------------------------------------------------------------------------------------------------------------------------------------------------------------------------------------------------------------------------------------------------------------------------------------------------------------------------------------------------------------------------------------------------------------------------------------------------------------------------------------------------------------------------------------------------------------------------------------------------------------------------------------------------------------------------------------------------------------------------------------------------------------------------------------------------------------------------------------------------------------------------------------------------------------|------------------------------------------------------------------------------------------------------------------------------------------------------------------------------------------------------------------------------------------------------------------------------------------------------------------------------------------|
| <p>- Infertility.<br/>- Vaginal dryness.<br/>- Loss of libido.</p> <p>- In men:<br/>- Erectile dysfunction.<br/>- Loss of libido.<br/>- Reduced body and facial hair.<br/>- Infertility.</p> <p>5. <b>Growth Hormone (GH) Deficiency</b> (less commonly affected by ICI-associated hypophysitis):</p> <ul style="list-style-type: none"> <li>- In children:<br/>- Growth retardation or failure to thrive.</li> <li>- In adults:<br/>- Muscle weakness.<br/>- Fatigue.<br/>- Reduced bone density or osteoporosis.<br/>- Increased adipose tissue, especially around the waist.</li> </ul> <p>6. <b>Prolactin Deficiency</b> (rare):</p> <ul style="list-style-type: none"> <li>- In women: Inability to produce milk postpartum.</li> </ul> <p>7. <b>Antidiuretic Hormone (ADH) Deficiency</b> leading to central diabetes insipidus:</p> <ul style="list-style-type: none"> <li>- Polyuria (excessive urination).</li> <li>- Polydipsia (excessive thirst).</li> <li>- Nocturia (frequent urination at night).</li> </ul> <p>8. <b>Enlargement of the Pituitary Gland</b>:</p> <ul style="list-style-type: none"> <li>- Can lead to symptoms related to compression, like headaches and visual disturbances.</li> </ul> <p>It's important to note that these symptoms can be non-specific and overlap with other conditions or side effects of cancer treatments. If hypophysitis or hypopituitarism is suspected, a thorough endocrinological evaluation, including specific hormonal assays and imaging studies, is crucial for diagnosis and management. Collaboration with an endocrinologist can guide appropriate assessment and treatment.</p> | <p>and <b>Urine Osmolality</b>: To evaluate for diabetes insipidus. In central diabetes insipidus, one would expect elevated serum osmolality (indicative of dehydration) and inappropriately dilute urine.</p> <ul style="list-style-type: none"> <li>- <b>Autoantibodies</b>: Some studies suggest checking pituitary autoantibodies, though their role in ICI-associated hypophysitis is not well-defined.</li> </ul> <p>3. <b>Imaging Studies</b>:</p> <ul style="list-style-type: none"> <li>- <b>MRI of the Pituitary</b>: This is the imaging modality of choice.<br/>- Findings consistent with hypophysitis might include enlargement of the pituitary gland, thickening of the pituitary stalk, or loss of the bright signal of the posterior pituitary. Enhancement post-gadolinium can also be seen.<br/>- MRI can also help rule out other pathologies like pituitary adenomas, metastases, or other sellar and parasellar masses.</li> </ul> <p>4. <b>Visual Field Testing</b>:</p> <ul style="list-style-type: none"> <li>- If there's concern about compression of the optic chiasm due to pituitary enlargement (as in cases of significant headache or visual symptoms), a formal visual field test can be done to assess for bitemporal hemianopia or other visual field defects.</li> </ul> <p>Prompt and comprehensive evaluation is crucial for timely diagnosis and management. Collaboration with an endocrinologist and, if necessary, a neuro-ophthalmologist, can guide the diagnostic process and ensure comprehensive assessment and care.</p> | <p>potential risks and challenges of managing hypopituitarism.</p> <ul style="list-style-type: none"> <li>- The patient's preferences and quality of life considerations also play a critical role in the decision-making process.</li> </ul> <p>5. <b>Multidisciplinary Collaboration</b>:</p> <ul style="list-style-type: none"> <li>- Collaboration between oncologists and endocrinologists is crucial in these scenarios to make informed decisions regarding the continuation or discontinuation of ICI therapy in the context of hypopituitarism.</li> </ul> <p>It's essential to highlight that ICI-associated hypopituitarism can be permanent even after discontinuation of the ICI. Thus, the primary goal is stabilizing the patient and ensuring appropriate hormone replacement rather than reversing the condition.</p> | <p>replacement unless they have significant symptoms of estrogen deficiency.</p> <p>4. <b>Growth Hormone Replacement</b> (less commonly affected):</p> <ul style="list-style-type: none"> <li>- <b>Somatropin</b>: Dosage is individualized, typically starting low and titrating up based on IGF-1 levels and side effects.</li> </ul> <p>5. <b>Desmopressin for Central Diabetes Insipidus</b>:</p> <ul style="list-style-type: none"> <li>- If there is a deficiency of antidiuretic hormone (ADH) or vasopressin, leading to central diabetes insipidus.<br/>- <b>Desmopressin (DDAVP)</b>: It can be administered as a nasal spray, oral tablet, or injection. Dosage and frequency depend on the formulation and the severity of the condition.</li> </ul> <p>6. <b>High-dose Steroids for Acute Management</b>:</p> <ul style="list-style-type: none"> <li>- In cases with severe symptoms or complications (like visual symptoms due to pituitary enlargement), high-dose corticosteroids, such as methylprednisolone, might be administered initially.<br/>- The specific dose can vary, but a common regimen is <b>methylprednisolone 1 g/day intravenously for 3-5 days</b>.</li> </ul> <p>7. <b>Monitoring and Adjustment</b>:</p> <ul style="list-style-type: none"> <li>- Regular clinical assessment and hormone level monitoring are crucial. The dosages of the replacement hormones will be adjusted based on clinical symptoms and laboratory values.</li> </ul> <p>8. <b>Education</b>:</p> <ul style="list-style-type: none"> <li>- Patients should be educated about the symptoms of hormone excess or insufficiency, especially for glucocorticoids, and should be provided with guidance on dose adjustments during illness or stress.</li> </ul> <p>Management of ICI-associated hypophysitis often requires a collaborative approach involving oncologists and endocrinologists. Early diagnosis and appropriate treatment are crucial to minimize complications and improve outcomes.</p> | <p>require lifelong glucocorticoid replacement due to persistent ACTH deficiency.</p> <p>It's crucial to approach the decision of reducing or discontinuing glucocorticoid replacement with caution. Regular monitoring and collaboration with an endocrinologist are vital to ensure patient safety and optimal hormone management.</p> |
|---------------------------------------------------------------------------------------------------------------------------------------------------------------------------------------------------------------------------------------------------------------------------------------------------------------------------------------------------------------------------------------------------------------------------------------------------------------------------------------------------------------------------------------------------------------------------------------------------------------------------------------------------------------------------------------------------------------------------------------------------------------------------------------------------------------------------------------------------------------------------------------------------------------------------------------------------------------------------------------------------------------------------------------------------------------------------------------------------------------------------------------------------------------------------------------------------------------------------------------------------------------------------------------------------------------------------------------------------------------------------------------------------------------------------------------------------------------------------------------------------------------------------------------------------------------------------------------------------------------------------------------------------------|-----------------------------------------------------------------------------------------------------------------------------------------------------------------------------------------------------------------------------------------------------------------------------------------------------------------------------------------------------------------------------------------------------------------------------------------------------------------------------------------------------------------------------------------------------------------------------------------------------------------------------------------------------------------------------------------------------------------------------------------------------------------------------------------------------------------------------------------------------------------------------------------------------------------------------------------------------------------------------------------------------------------------------------------------------------------------------------------------------------------------------------------------------------------------------------------------------------------------------------------------------------------------------------------------------------------------------------------------------------------------------------------------------------------------------------------------------------------------------------------------------------------------------------------------------------------------------|----------------------------------------------------------------------------------------------------------------------------------------------------------------------------------------------------------------------------------------------------------------------------------------------------------------------------------------------------------------------------------------------------------------------------------------------------------------------------------------------------------------------------------------------------------------------------------------------------------------------------------------------------------------------------------------------------------------------------------------------------------------------------------------------------------------------------------------|----------------------------------------------------------------------------------------------------------------------------------------------------------------------------------------------------------------------------------------------------------------------------------------------------------------------------------------------------------------------------------------------------------------------------------------------------------------------------------------------------------------------------------------------------------------------------------------------------------------------------------------------------------------------------------------------------------------------------------------------------------------------------------------------------------------------------------------------------------------------------------------------------------------------------------------------------------------------------------------------------------------------------------------------------------------------------------------------------------------------------------------------------------------------------------------------------------------------------------------------------------------------------------------------------------------------------------------------------------------------------------------------------------------------------------------------------------------------------------------------------------------------------------------------------------------------------------------------------------------------------------------------------------------------------------------------------------------------------------------------------------------------------------------------------------------------------------------------------------------------------------------------------------------------------------------------------------------------------------------------------------------------|------------------------------------------------------------------------------------------------------------------------------------------------------------------------------------------------------------------------------------------------------------------------------------------------------------------------------------------|

|                           | Rheumatologic Toxicity                                                                                                                                                                                                                                                                                                                                                                                                                                                                                                                                                                                                                                                                                                                                                                                                                                                                                                                                                                                                                                                                                                                                                                                                                                                                                                                                                                                                                                                                                                                                                                                                                                                                                                                                                | Rheumatologic Toxicity                                                                                                                                                                                                                                                                                                                                                                                                                                                                                                                                                                                                                                                                                                                                                                                                                                                                                                                                                                                                                                                                                                                                                                                                                                                                                                                                                                                                                                                                                                                                                                                                                                                                                                                                                                                                                                                                                         | Rheumatologic Toxicity                                                                                                                                                                                                                                                                                                                                                                                                                                                                                                                                                                                                                                                                                                                                                                                                                                                                                                                                                                                                                                                                                                                                                                                                                                                                                                                                                                                                                                                                                                                                                                                                                                                                                                                                                                                                                                                       | Rheumatologic Toxicity                                                                                                                                                                                                                                                                                                                                                                                                                                                                                                                                                                                                                                                                                                                                                                                                                                                                                                                                                                                                                                                                                                                                                                                                                                                                                                                                                                                                                                                                                                                                                                                                                                                                                                                                                                                                                                                                                 | Rheumatologic Toxicity                                                                                                                                                                                                                                                                                                                                                                                                                                                                                                                                                                                                                                                                                                                                                                                                                                                                                                                                                                                                                                                                                                                                                                                                                                                                                                                                                                                                                                                                                                                                                                                                                                                                                                                                                                                                                                                                                                                                                                                                                                                                                                                                                                                                                                                                                        |
|---------------------------|-----------------------------------------------------------------------------------------------------------------------------------------------------------------------------------------------------------------------------------------------------------------------------------------------------------------------------------------------------------------------------------------------------------------------------------------------------------------------------------------------------------------------------------------------------------------------------------------------------------------------------------------------------------------------------------------------------------------------------------------------------------------------------------------------------------------------------------------------------------------------------------------------------------------------------------------------------------------------------------------------------------------------------------------------------------------------------------------------------------------------------------------------------------------------------------------------------------------------------------------------------------------------------------------------------------------------------------------------------------------------------------------------------------------------------------------------------------------------------------------------------------------------------------------------------------------------------------------------------------------------------------------------------------------------------------------------------------------------------------------------------------------------|----------------------------------------------------------------------------------------------------------------------------------------------------------------------------------------------------------------------------------------------------------------------------------------------------------------------------------------------------------------------------------------------------------------------------------------------------------------------------------------------------------------------------------------------------------------------------------------------------------------------------------------------------------------------------------------------------------------------------------------------------------------------------------------------------------------------------------------------------------------------------------------------------------------------------------------------------------------------------------------------------------------------------------------------------------------------------------------------------------------------------------------------------------------------------------------------------------------------------------------------------------------------------------------------------------------------------------------------------------------------------------------------------------------------------------------------------------------------------------------------------------------------------------------------------------------------------------------------------------------------------------------------------------------------------------------------------------------------------------------------------------------------------------------------------------------------------------------------------------------------------------------------------------------|------------------------------------------------------------------------------------------------------------------------------------------------------------------------------------------------------------------------------------------------------------------------------------------------------------------------------------------------------------------------------------------------------------------------------------------------------------------------------------------------------------------------------------------------------------------------------------------------------------------------------------------------------------------------------------------------------------------------------------------------------------------------------------------------------------------------------------------------------------------------------------------------------------------------------------------------------------------------------------------------------------------------------------------------------------------------------------------------------------------------------------------------------------------------------------------------------------------------------------------------------------------------------------------------------------------------------------------------------------------------------------------------------------------------------------------------------------------------------------------------------------------------------------------------------------------------------------------------------------------------------------------------------------------------------------------------------------------------------------------------------------------------------------------------------------------------------------------------------------------------------|--------------------------------------------------------------------------------------------------------------------------------------------------------------------------------------------------------------------------------------------------------------------------------------------------------------------------------------------------------------------------------------------------------------------------------------------------------------------------------------------------------------------------------------------------------------------------------------------------------------------------------------------------------------------------------------------------------------------------------------------------------------------------------------------------------------------------------------------------------------------------------------------------------------------------------------------------------------------------------------------------------------------------------------------------------------------------------------------------------------------------------------------------------------------------------------------------------------------------------------------------------------------------------------------------------------------------------------------------------------------------------------------------------------------------------------------------------------------------------------------------------------------------------------------------------------------------------------------------------------------------------------------------------------------------------------------------------------------------------------------------------------------------------------------------------------------------------------------------------------------------------------------------------|---------------------------------------------------------------------------------------------------------------------------------------------------------------------------------------------------------------------------------------------------------------------------------------------------------------------------------------------------------------------------------------------------------------------------------------------------------------------------------------------------------------------------------------------------------------------------------------------------------------------------------------------------------------------------------------------------------------------------------------------------------------------------------------------------------------------------------------------------------------------------------------------------------------------------------------------------------------------------------------------------------------------------------------------------------------------------------------------------------------------------------------------------------------------------------------------------------------------------------------------------------------------------------------------------------------------------------------------------------------------------------------------------------------------------------------------------------------------------------------------------------------------------------------------------------------------------------------------------------------------------------------------------------------------------------------------------------------------------------------------------------------------------------------------------------------------------------------------------------------------------------------------------------------------------------------------------------------------------------------------------------------------------------------------------------------------------------------------------------------------------------------------------------------------------------------------------------------------------------------------------------------------------------------------------------------|
| Question                  | What is the initial diagnostic workup for suspected immune checkpoint inhibitor associated arthritis?                                                                                                                                                                                                                                                                                                                                                                                                                                                                                                                                                                                                                                                                                                                                                                                                                                                                                                                                                                                                                                                                                                                                                                                                                                                                                                                                                                                                                                                                                                                                                                                                                                                                 | What is the initial treatment for moderate (grade 2) arthritis associated with immune checkpoint inhibitors?                                                                                                                                                                                                                                                                                                                                                                                                                                                                                                                                                                                                                                                                                                                                                                                                                                                                                                                                                                                                                                                                                                                                                                                                                                                                                                                                                                                                                                                                                                                                                                                                                                                                                                                                                                                                   | What adjunctive immunosuppressive treatments can be used for arthritis from immune checkpoint inhibitors as alternatives to corticosteroids?                                                                                                                                                                                                                                                                                                                                                                                                                                                                                                                                                                                                                                                                                                                                                                                                                                                                                                                                                                                                                                                                                                                                                                                                                                                                                                                                                                                                                                                                                                                                                                                                                                                                                                                                 | What is the treatment for xerostomia associated with immune checkpoint inhibitors?                                                                                                                                                                                                                                                                                                                                                                                                                                                                                                                                                                                                                                                                                                                                                                                                                                                                                                                                                                                                                                                                                                                                                                                                                                                                                                                                                                                                                                                                                                                                                                                                                                                                                                                                                                                                                     | If a patient has immune checkpoint inhibitor associated myositis, what are life threatening complications that can occur?                                                                                                                                                                                                                                                                                                                                                                                                                                                                                                                                                                                                                                                                                                                                                                                                                                                                                                                                                                                                                                                                                                                                                                                                                                                                                                                                                                                                                                                                                                                                                                                                                                                                                                                                                                                                                                                                                                                                                                                                                                                                                                                                                                                     |
| Answer Engine 1 (ChatGPT) | <p>Immune checkpoint inhibitor (ICI)-associated arthritis is an immune-related adverse event where the joints become inflamed, leading to symptoms like pain, swelling, and stiffness. If ICI-associated arthritis is suspected, the following diagnostic workup can be initiated:</p> <ol style="list-style-type: none"> <li><b>Clinical Assessment</b>: <ul style="list-style-type: none"> <li>Detailed history of joint symptoms, including the onset, pattern (e.g., symmetrical vs. asymmetrical), involved joints, duration, and any associated systemic symptoms.</li> <li>Physical examination to assess joint tenderness, swelling, warmth, range of motion, and possible presence of joint effusions.</li> </ul> </li> <li><b>Laboratory Tests</b>: <ul style="list-style-type: none"> <li><b>Complete Blood Count (CBC)</b>: To evaluate for signs of systemic inflammation or other concurrent conditions.</li> <li><b>Erythrocyte Sedimentation Rate (ESR)</b> and <b>C-reactive Protein (CRP)</b>: Non-specific markers of inflammation.</li> <li><b>Rheumatoid Factor (RF)</b> and <b>Anti-Cyclic Citrullinated Peptide (anti-CCP) Antibodies</b>: Useful in distinguishing ICI-induced arthritis from rheumatoid arthritis, although it's worth noting that these can occasionally be positive in ICI-associated arthritis.</li> <li><b>Antinuclear Antibody (ANA)</b>: To evaluate for other autoimmune conditions.</li> <li><b>Joint Fluid Analysis</b>: In patients with a swollen joint, aspirating the joint and analyzing the fluid can help distinguish between inflammatory and infectious arthritis.</li> </ul> </li> <li><b>Imaging Studies</b>: <ul style="list-style-type: none"> <li><b>Plain Radiographs (X-</b></li> </ul> </li> </ol> | <p>The treatment for moderate (grade 2) arthritis associated with immune checkpoint inhibitors (ICIs) focuses on alleviating symptoms and controlling inflammation. Here's a general approach to initial treatment:</p> <ol style="list-style-type: none"> <li><b>Nonsteroidal Anti-inflammatory Drugs (NSAIDs)</b>: <ul style="list-style-type: none"> <li>These are often the first-line agents to control pain and inflammation.</li> <li>Commonly used NSAIDs include ibuprofen, naproxen, and diclofenac. The choice of NSAID and dosage should be based on the individual patient's needs, other comorbidities, and potential drug interactions.</li> <li>Regular monitoring for potential side effects, such as gastrointestinal irritation or kidney dysfunction, is essential.</li> </ul> </li> <li><b>Corticosteroids</b>: <ul style="list-style-type: none"> <li>If arthritis symptoms are not adequately controlled with NSAIDs or if there are contraindications to NSAID use, oral corticosteroids, like prednisone, can be considered.</li> <li>For moderate (grade 2) arthritis, a typical starting dose might be low to moderate, such as prednisone 10-20 mg daily. The dose can be tapered down once symptoms improve.</li> <li>It's crucial to be aware of potential side effects associated with corticosteroid use, such as hyperglycemia, hypertension, mood changes, and increased risk of infections.</li> </ul> </li> <li><b>Physical Therapy</b>: <ul style="list-style-type: none"> <li>Physical and occupational therapy can be beneficial to maintain joint mobility, alleviate pain, and optimize function.</li> </ul> </li> <li><b>Joint Injections</b>: <ul style="list-style-type: none"> <li>In cases where one or a few joints are predominantly affected, corticosteroid injections directly into the joint can be considered to relieve symptoms.</li> </ul> </li> </ol> | <p>When arthritis from immune checkpoint inhibitors (ICIs) doesn't respond adequately to corticosteroids or when there's a need to minimize corticosteroid exposure, several adjunctive immunosuppressive treatments can be considered. These agents aim to control inflammation and are usually administered in collaboration with a rheumatologist. Here are some potential treatments:</p> <ol style="list-style-type: none"> <li><b>Disease-Modifying Antirheumatic Drugs (DMARDs)</b>: <ul style="list-style-type: none"> <li><b>Methotrexate</b>: Often considered a first-line DMARD for rheumatoid arthritis, methotrexate can also be used for ICI-associated arthritis. It's typically given once a week, either orally or as an injection.</li> <li><b>Hydroxychloroquine</b>: An antimalarial drug that has anti-inflammatory properties, it's used in rheumatoid arthritis and lupus.</li> <li><b>Sulfasalazine</b>: Another DMARD useful in inflammatory arthritis.</li> <li><b>Leflunomide</b>: An immunomodulatory drug that can be considered in cases refractory to other treatments.</li> </ul> </li> <li><b>Biologic DMARDs</b>: <ul style="list-style-type: none"> <li>These are drugs that target specific molecules involved in the inflammatory process.</li> <li><b>Tumor Necrosis Factor (TNF) inhibitors</b>: Such as infliximab, adalimumab, etanercept, certolizumab, and golimumab. They target TNF-alpha, a pro-inflammatory cytokine.</li> <li><b>Interleukin-6 (IL-6) inhibitors</b>: Such as tocilizumab. IL-6 plays a role in inflammation and can be targeted in some inflammatory conditions.</li> <li><b>Interleukin-17 (IL-17) inhibitors</b>: Such as secukinumab and ixekizumab.</li> <li><b>Interleukin-12/23 (IL-12/23) inhibitor</b>: Such as ustekinumab.</li> </ul> </li> <li><b>Janus Kinase (JAK) Inhibitors</b>:</li> </ol> | <p>Xerostomia, or dry mouth, associated with immune checkpoint inhibitors (ICIs) can be bothersome and impact a patient's quality of life. Management focuses on symptom relief, prevention of complications, and preserving oral health. Here are some therapeutic approaches to consider:</p> <ol style="list-style-type: none"> <li><b>Saliva Substitutes and Stimulants</b>: <ul style="list-style-type: none"> <li><b>Artificial Saliva</b>: Over-the-counter products like mouthwashes, sprays, or gels can be used to moisten the oral mucosa.</li> <li><b>Pilocarpine (Salagen)</b> and <b>Cevimeline (Evoxac)</b>: These are cholinergic agonists that stimulate saliva production. They are prescription medications, and patients should be monitored for side effects like excessive sweating or gastrointestinal upset.</li> </ul> </li> <li><b>Oral Hygiene and Dental Care</b>: <ul style="list-style-type: none"> <li>Due to the reduced salivary flow, there's an increased risk of dental cavities. Regular dental check-ups, professional cleanings, and fluoride treatments can help maintain dental health.</li> <li>Use of fluoride toothpaste and non-alcohol-based mouthwashes.</li> <li>Chew sugar-free gum or suck on sugar-free candies to stimulate saliva production.</li> </ul> </li> <li><b>Hydration</b>: <ul style="list-style-type: none"> <li>Regular sips of water throughout the day can help alleviate dryness.</li> <li>Avoiding caffeine and alcohol, as they can exacerbate dryness.</li> </ul> </li> <li><b>Humidification</b>: <ul style="list-style-type: none"> <li>Using a room humidifier, especially at night, can help alleviate symptoms.</li> </ul> </li> <li><b>Lip Care</b>: <ul style="list-style-type: none"> <li>Regular use of lip balms or moisturizers can prevent chapping and discomfort associated with dry lips.</li> </ul> </li> </ol> | <p>Immune checkpoint inhibitor (ICI)-associated myositis is a rare but potentially severe immune-related adverse event. While myositis refers to muscle inflammation that can cause muscle weakness and pain, several life-threatening complications can arise:</p> <ol style="list-style-type: none"> <li><b>Cardiac Involvement</b>: <ul style="list-style-type: none"> <li><b>Myocarditis</b>: This is one of the most severe and life-threatening complications of ICI-associated myositis. Inflammation of the heart muscle can lead to arrhythmias, heart failure, and sudden cardiac death. Patients might present with chest pain, shortness of breath, palpitations, or fatigue.</li> <li><b>Pericarditis</b>: Inflammation of the lining around the heart can lead to fluid accumulation, causing pericardial effusion. In severe cases, it can progress to cardiac tamponade, a medical emergency where the heart's function is compromised.</li> </ul> </li> <li><b>Respiratory Compromise</b>: <ul style="list-style-type: none"> <li><b>Aspiration</b>: Muscle weakness, especially involving the throat and esophagus, can lead to difficulty swallowing (dysphagia) and increase the risk of aspiration, potentially leading to aspiration pneumonia.</li> <li><b>Respiratory Muscle Weakness</b>: Severe involvement of the respiratory muscles can cause hypoventilation and respiratory failure, necessitating mechanical ventilation.</li> </ul> </li> <li><b>Rhabdomyolysis</b>: <ul style="list-style-type: none"> <li>Severe muscle inflammation can lead to the breakdown of muscle tissue, releasing myoglobin into the bloodstream. This can damage the kidneys and lead to acute kidney injury. Signs include dark or tea-colored urine, muscle pain, and weakness.</li> </ul> </li> <li><b>Overlap Syndromes</b>: <ul style="list-style-type: none"> <li>In some cases, ICI-associated myositis might occur in conjunction with other immune-related adverse events, such as myocarditis, pneumonitis, or hepatitis. These can compound the severity of the clinical picture and increase the risk of life-threatening outcomes.</li> </ul> </li> <li><b>Electrolyte Abnormalities</b>: <ul style="list-style-type: none"> <li>Severe muscle breakdown can</li> </ul> </li> </ol> |

|                                                                                                                                                                                                                                                                                                                                                                                                                                                                                                                                                                                                                                                                                                                                                                                                                                                                                                                                                                                                                                                                                                                                                                                                                                                                                                                                                          |                                                                                                                                                                                                                                                                                                                                                                                                                                                                                                                                                                                                                                                                                                                                                                                                                                                                                                                                                                                                                                                                                                                                                                                                                                                                                                                                                                                                                                                                   |                                                                                                                                                                                                                                                                                                                                                                                                                                                                                                                                                                                                                                                                                                                                                                                                                                                                                                                                                                                                                                                                                                                                                                                                                                                                                                                                       |                                                                                                                                                                                                                                                                                                                                                                                                                                                                                                                                                                                                                                                                                                                                                                                                                                                                                                                                                                                                                                                                                                                                                                                                                                                                                                                                                                                                                                                                                                                                                      |                                                                                                                                                                                                                                                                                                                                                                                                                                                                                                                                                                                |
|----------------------------------------------------------------------------------------------------------------------------------------------------------------------------------------------------------------------------------------------------------------------------------------------------------------------------------------------------------------------------------------------------------------------------------------------------------------------------------------------------------------------------------------------------------------------------------------------------------------------------------------------------------------------------------------------------------------------------------------------------------------------------------------------------------------------------------------------------------------------------------------------------------------------------------------------------------------------------------------------------------------------------------------------------------------------------------------------------------------------------------------------------------------------------------------------------------------------------------------------------------------------------------------------------------------------------------------------------------|-------------------------------------------------------------------------------------------------------------------------------------------------------------------------------------------------------------------------------------------------------------------------------------------------------------------------------------------------------------------------------------------------------------------------------------------------------------------------------------------------------------------------------------------------------------------------------------------------------------------------------------------------------------------------------------------------------------------------------------------------------------------------------------------------------------------------------------------------------------------------------------------------------------------------------------------------------------------------------------------------------------------------------------------------------------------------------------------------------------------------------------------------------------------------------------------------------------------------------------------------------------------------------------------------------------------------------------------------------------------------------------------------------------------------------------------------------------------|---------------------------------------------------------------------------------------------------------------------------------------------------------------------------------------------------------------------------------------------------------------------------------------------------------------------------------------------------------------------------------------------------------------------------------------------------------------------------------------------------------------------------------------------------------------------------------------------------------------------------------------------------------------------------------------------------------------------------------------------------------------------------------------------------------------------------------------------------------------------------------------------------------------------------------------------------------------------------------------------------------------------------------------------------------------------------------------------------------------------------------------------------------------------------------------------------------------------------------------------------------------------------------------------------------------------------------------|------------------------------------------------------------------------------------------------------------------------------------------------------------------------------------------------------------------------------------------------------------------------------------------------------------------------------------------------------------------------------------------------------------------------------------------------------------------------------------------------------------------------------------------------------------------------------------------------------------------------------------------------------------------------------------------------------------------------------------------------------------------------------------------------------------------------------------------------------------------------------------------------------------------------------------------------------------------------------------------------------------------------------------------------------------------------------------------------------------------------------------------------------------------------------------------------------------------------------------------------------------------------------------------------------------------------------------------------------------------------------------------------------------------------------------------------------------------------------------------------------------------------------------------------------|--------------------------------------------------------------------------------------------------------------------------------------------------------------------------------------------------------------------------------------------------------------------------------------------------------------------------------------------------------------------------------------------------------------------------------------------------------------------------------------------------------------------------------------------------------------------------------|
| <p>rays)**: Useful to assess joint erosions, joint space narrowing, and other structural changes.</p> <ul style="list-style-type: none"> <li>- **Ultrasound** or **MRI**): These can detect joint inflammation, synovitis, tenosynovitis, and erosions, even if not apparent on physical examination or plain radiographs.</li> </ul> <p>4. <b>Differential Diagnosis**:</b></p> <ul style="list-style-type: none"> <li>- It's essential to consider other potential causes of arthritis, such as: <ul style="list-style-type: none"> <li>- Osteoarthritis</li> <li>- Rheumatoid arthritis or other inflammatory arthritides</li> <li>- Infectious arthritis</li> <li>- Gout or pseudogout</li> </ul> </li> <li>- The clinical presentation, lab findings, and imaging studies can help distinguish ICI-associated arthritis from these other conditions.</li> </ul> <p>5. <b>Consultation**:</b></p> <ul style="list-style-type: none"> <li>- Consider a referral to a rheumatologist for a comprehensive evaluation, especially if the diagnosis is unclear or if there's a need for advanced therapeutic interventions.</li> </ul> <p>Prompt diagnosis and management of ICI-associated arthritis are crucial to relieve symptoms, prevent joint damage, and ensure the continuity of cancer therapy with minimal interruptions or complications.</p> | <p>5. <b>Immune Checkpoint Inhibitor Management**:</b></p> <ul style="list-style-type: none"> <li>- For grade 2 arthritis, it might be possible to continue ICI therapy with close monitoring. However, temporary interruption of the ICI might be considered based on the severity of symptoms, the extent of joint involvement, and the patient's overall clinical situation.</li> </ul> <p>6. <b>Rheumatology Consultation**:</b></p> <ul style="list-style-type: none"> <li>- A referral to a rheumatologist can be valuable for confirming the diagnosis, guiding treatment, and monitoring response to therapy. They can also provide expertise if there's a need for more advanced therapeutic interventions or if there are concerns about differential diagnoses.</li> </ul> <p>7. <b>Disease-modifying Antirheumatic Drugs (DMARDs)**:</b></p> <ul style="list-style-type: none"> <li>- Although typically reserved for more severe cases or chronic ICI-associated arthritis, DMARDs like methotrexate or hydroxychloroquine might be considered in some situations, especially if there's inadequate response to the above treatments. Decisions regarding DMARD use are usually made in collaboration with a rheumatologist.</li> </ul> <p>Regular monitoring of response to treatment, potential drug side effects, and overall patient well-being is crucial. Adjustments to therapy might be required based on the evolving clinical picture.</p> | <ul style="list-style-type: none"> <li>- Drugs like tofacitinib, baricitinib, and upadacitinib inhibit JAK enzymes, which play a role in the signaling pathways of various pro-inflammatory cytokines.</li> </ul> <p>4. <b>Nonsteroidal Anti-Inflammatory Drugs (NSAIDs)**:</b></p> <ul style="list-style-type: none"> <li>- While not immunosuppressive, NSAIDs can be used alongside other treatments to control symptoms. However, they may not be adequate as monotherapy for severe ICI-associated arthritis.</li> </ul> <p>5. <b>Physical and Occupational Therapy**:</b></p> <ul style="list-style-type: none"> <li>- Not immunosuppressive per se, but adjunctive therapy with physical or occupational therapy can help with symptom management, joint function, and mobility.</li> </ul> <p>6. <b>Joint Injections**:</b></p> <ul style="list-style-type: none"> <li>- For patients with predominant symptoms in one or a few joints, corticosteroid injections directly into the joints can provide relief.</li> </ul> <p>When considering these treatments, it's essential to evaluate potential interactions with cancer treatments, the underlying malignancy, and potential side effects. Close collaboration between oncologists and rheumatologists is vital to optimize treatment and monitor for side effects.</p> | <p>6. <b>Avoid Irritants**:</b></p> <ul style="list-style-type: none"> <li>- Reduce intake of spicy or acidic foods that can irritate a dry mouth.</li> <li>- Avoid tobacco products and limit alcohol and caffeine intake, as they can exacerbate dryness.</li> </ul> <p>7. <b>Management of Potential Underlying Causes**:</b></p> <ul style="list-style-type: none"> <li>- If the xerostomia is suspected to be related to an immune-mediated salivary gland inflammation (like sialadenitis), a short course of corticosteroids might be considered after consulting with a specialist.</li> <li>- Review other medications that the patient might be taking, as many drugs (outside of ICIs) can cause xerostomia as a side effect.</li> </ul> <p>8. <b>Regular Follow-up**:</b></p> <ul style="list-style-type: none"> <li>- Monitoring and regular follow-up are essential to assess the efficacy of interventions, adjust treatments as needed, and check for complications related to xerostomia.</li> </ul> <p>9. <b>Collaboration**:</b></p> <ul style="list-style-type: none"> <li>- Consider consulting or collaborating with dental specialists, rheumatologists, or otolaryngologists for comprehensive care, especially if xerostomia is severe or if there are signs of salivary gland inflammation.</li> </ul> <p>The primary goal is to alleviate symptoms, prevent complications, and enhance the patient's quality of life. Individualized care and regular follow-up can ensure optimal management and patient well-being.</p> | <p>lead to electrolyte disturbances, including hyperkalemia (elevated potassium levels), which can cause cardiac arrhythmias.</p> <p>Due to these potential life-threatening complications, it's crucial to have a high index of suspicion for ICI-associated myositis in patients presenting with muscle symptoms on ICIs. Early diagnosis, close monitoring, and aggressive intervention can mitigate these risks. Collaborative care involving oncologists, rheumatologists, cardiologists, and intensive care specialists may be essential in managing these patients.</p> |
|----------------------------------------------------------------------------------------------------------------------------------------------------------------------------------------------------------------------------------------------------------------------------------------------------------------------------------------------------------------------------------------------------------------------------------------------------------------------------------------------------------------------------------------------------------------------------------------------------------------------------------------------------------------------------------------------------------------------------------------------------------------------------------------------------------------------------------------------------------------------------------------------------------------------------------------------------------------------------------------------------------------------------------------------------------------------------------------------------------------------------------------------------------------------------------------------------------------------------------------------------------------------------------------------------------------------------------------------------------|-------------------------------------------------------------------------------------------------------------------------------------------------------------------------------------------------------------------------------------------------------------------------------------------------------------------------------------------------------------------------------------------------------------------------------------------------------------------------------------------------------------------------------------------------------------------------------------------------------------------------------------------------------------------------------------------------------------------------------------------------------------------------------------------------------------------------------------------------------------------------------------------------------------------------------------------------------------------------------------------------------------------------------------------------------------------------------------------------------------------------------------------------------------------------------------------------------------------------------------------------------------------------------------------------------------------------------------------------------------------------------------------------------------------------------------------------------------------|---------------------------------------------------------------------------------------------------------------------------------------------------------------------------------------------------------------------------------------------------------------------------------------------------------------------------------------------------------------------------------------------------------------------------------------------------------------------------------------------------------------------------------------------------------------------------------------------------------------------------------------------------------------------------------------------------------------------------------------------------------------------------------------------------------------------------------------------------------------------------------------------------------------------------------------------------------------------------------------------------------------------------------------------------------------------------------------------------------------------------------------------------------------------------------------------------------------------------------------------------------------------------------------------------------------------------------------|------------------------------------------------------------------------------------------------------------------------------------------------------------------------------------------------------------------------------------------------------------------------------------------------------------------------------------------------------------------------------------------------------------------------------------------------------------------------------------------------------------------------------------------------------------------------------------------------------------------------------------------------------------------------------------------------------------------------------------------------------------------------------------------------------------------------------------------------------------------------------------------------------------------------------------------------------------------------------------------------------------------------------------------------------------------------------------------------------------------------------------------------------------------------------------------------------------------------------------------------------------------------------------------------------------------------------------------------------------------------------------------------------------------------------------------------------------------------------------------------------------------------------------------------------|--------------------------------------------------------------------------------------------------------------------------------------------------------------------------------------------------------------------------------------------------------------------------------------------------------------------------------------------------------------------------------------------------------------------------------------------------------------------------------------------------------------------------------------------------------------------------------|



|                           | Neuromuscular Toxicity                                                                                                                                                                                                                                                                                                                                                                                                                                                                                                                                                                                                                                                                                                                                                                                                                                                                                                                                                                                                                                                                                                                                                                                                                                                                                                                                                                                                                                                                                                                                                                                                                                                                                      | Neuromuscular Toxicity                                                                                                                                                                                                                                                                                                                                                                                                                                                                                                                                                                                                                                                                                                                                                                                                                                                                                                                                                                                                                                                                                                                                                                                                                                                                                                                                                                                                                                                                                                                                                                                                                                                                                                                                                                                                                                                                                     | Neuromuscular Toxicity                                                                                                                                                                                                                                                                                                                                                                                                                                                                                                                                                                                                                                                                                                                                                                                                                                                                                                                                                                                                                                                                                                                                                                                                                                                                                                                                                                                                                                                                                                                                                                                                                                                                                                                                                                                                                                                        | Neuromuscular Toxicity                                                                                                                                                                                                                                                                                                                                                                                                                                                                                                                                                                                                                                                                                                                                                                                                                                                                                                                                                                                                                                                                                                                                                                                                                                                                                                                                                                                                                                                                                                                                                                                                                                                                                                                                                                                                                                                                                                                                                                                                                                                                                                                                                       | Neuromuscular Toxicity                                                                                                                                                                                                                                                                                                                                                                                                                                                                                                                                                                                                                                                                                                                                                                                                                                                                                                                                                                                                                                                                                                                                                                                                                                                                                                                                                                                                                                                                                                                                                                                                                                                                                                                                                                                                                                                                                                                               |
|---------------------------|-------------------------------------------------------------------------------------------------------------------------------------------------------------------------------------------------------------------------------------------------------------------------------------------------------------------------------------------------------------------------------------------------------------------------------------------------------------------------------------------------------------------------------------------------------------------------------------------------------------------------------------------------------------------------------------------------------------------------------------------------------------------------------------------------------------------------------------------------------------------------------------------------------------------------------------------------------------------------------------------------------------------------------------------------------------------------------------------------------------------------------------------------------------------------------------------------------------------------------------------------------------------------------------------------------------------------------------------------------------------------------------------------------------------------------------------------------------------------------------------------------------------------------------------------------------------------------------------------------------------------------------------------------------------------------------------------------------|------------------------------------------------------------------------------------------------------------------------------------------------------------------------------------------------------------------------------------------------------------------------------------------------------------------------------------------------------------------------------------------------------------------------------------------------------------------------------------------------------------------------------------------------------------------------------------------------------------------------------------------------------------------------------------------------------------------------------------------------------------------------------------------------------------------------------------------------------------------------------------------------------------------------------------------------------------------------------------------------------------------------------------------------------------------------------------------------------------------------------------------------------------------------------------------------------------------------------------------------------------------------------------------------------------------------------------------------------------------------------------------------------------------------------------------------------------------------------------------------------------------------------------------------------------------------------------------------------------------------------------------------------------------------------------------------------------------------------------------------------------------------------------------------------------------------------------------------------------------------------------------------------------|-------------------------------------------------------------------------------------------------------------------------------------------------------------------------------------------------------------------------------------------------------------------------------------------------------------------------------------------------------------------------------------------------------------------------------------------------------------------------------------------------------------------------------------------------------------------------------------------------------------------------------------------------------------------------------------------------------------------------------------------------------------------------------------------------------------------------------------------------------------------------------------------------------------------------------------------------------------------------------------------------------------------------------------------------------------------------------------------------------------------------------------------------------------------------------------------------------------------------------------------------------------------------------------------------------------------------------------------------------------------------------------------------------------------------------------------------------------------------------------------------------------------------------------------------------------------------------------------------------------------------------------------------------------------------------------------------------------------------------------------------------------------------------------------------------------------------------------------------------------------------------|------------------------------------------------------------------------------------------------------------------------------------------------------------------------------------------------------------------------------------------------------------------------------------------------------------------------------------------------------------------------------------------------------------------------------------------------------------------------------------------------------------------------------------------------------------------------------------------------------------------------------------------------------------------------------------------------------------------------------------------------------------------------------------------------------------------------------------------------------------------------------------------------------------------------------------------------------------------------------------------------------------------------------------------------------------------------------------------------------------------------------------------------------------------------------------------------------------------------------------------------------------------------------------------------------------------------------------------------------------------------------------------------------------------------------------------------------------------------------------------------------------------------------------------------------------------------------------------------------------------------------------------------------------------------------------------------------------------------------------------------------------------------------------------------------------------------------------------------------------------------------------------------------------------------------------------------------------------------------------------------------------------------------------------------------------------------------------------------------------------------------------------------------------------------------|------------------------------------------------------------------------------------------------------------------------------------------------------------------------------------------------------------------------------------------------------------------------------------------------------------------------------------------------------------------------------------------------------------------------------------------------------------------------------------------------------------------------------------------------------------------------------------------------------------------------------------------------------------------------------------------------------------------------------------------------------------------------------------------------------------------------------------------------------------------------------------------------------------------------------------------------------------------------------------------------------------------------------------------------------------------------------------------------------------------------------------------------------------------------------------------------------------------------------------------------------------------------------------------------------------------------------------------------------------------------------------------------------------------------------------------------------------------------------------------------------------------------------------------------------------------------------------------------------------------------------------------------------------------------------------------------------------------------------------------------------------------------------------------------------------------------------------------------------------------------------------------------------------------------------------------------------|
| Question                  | What are the primary treatments for immune checkpoint inhibitor associated myasthenia gravis?                                                                                                                                                                                                                                                                                                                                                                                                                                                                                                                                                                                                                                                                                                                                                                                                                                                                                                                                                                                                                                                                                                                                                                                                                                                                                                                                                                                                                                                                                                                                                                                                               | What is the primary treatment for immune checkpoint inhibitor associated encephalitis?                                                                                                                                                                                                                                                                                                                                                                                                                                                                                                                                                                                                                                                                                                                                                                                                                                                                                                                                                                                                                                                                                                                                                                                                                                                                                                                                                                                                                                                                                                                                                                                                                                                                                                                                                                                                                     | What supportive care treatments should patients treated with immune checkpoint inhibitors who develop myasthenia gravis or Guillain Barre syndrome receive?                                                                                                                                                                                                                                                                                                                                                                                                                                                                                                                                                                                                                                                                                                                                                                                                                                                                                                                                                                                                                                                                                                                                                                                                                                                                                                                                                                                                                                                                                                                                                                                                                                                                                                                   | What is the differential diagnosis for immune checkpoint inhibitor associated meningitis?                                                                                                                                                                                                                                                                                                                                                                                                                                                                                                                                                                                                                                                                                                                                                                                                                                                                                                                                                                                                                                                                                                                                                                                                                                                                                                                                                                                                                                                                                                                                                                                                                                                                                                                                                                                                                                                                                                                                                                                                                                                                                    | What are indications associated with neurologic toxicities to permanently discontinue immune checkpoint inhibitors?                                                                                                                                                                                                                                                                                                                                                                                                                                                                                                                                                                                                                                                                                                                                                                                                                                                                                                                                                                                                                                                                                                                                                                                                                                                                                                                                                                                                                                                                                                                                                                                                                                                                                                                                                                                                                                  |
| Answer Engine 1 (ChatGPT) | <p>Immune checkpoint inhibitor (ICI)-associated myasthenia gravis (MG) is a rare but potentially severe immune-related adverse event. When associated with ICIs, MG can present more acutely and severely than classic MG. Given its potential for life-threatening complications, such as myasthenic crisis, prompt diagnosis and aggressive management are crucial. Here's a general approach to the primary treatments:</p> <ol style="list-style-type: none"> <li><b>**Discontinuation of ICI**:</b> <ul style="list-style-type: none"> <li>The first and foremost step is to stop the ICI therapy immediately if MG is suspected or diagnosed.</li> </ul> </li> <li><b>**Corticosteroids**:</b> <ul style="list-style-type: none"> <li>High-dose corticosteroids, like prednisone or methylprednisolone, are the mainstay of treatment for ICI-associated MG.</li> <li>The specific dose can vary, but initial treatments often involve high doses, such as methylprednisolone 1 g/day intravenously for 3-5 days, followed by oral prednisone, with a gradual taper based on clinical response.</li> </ul> </li> <li><b>**Plasma Exchange (PLEX) or Intravenous Immunoglobulin (IVIG)**:</b> <ul style="list-style-type: none"> <li>In severe cases, especially if there's respiratory compromise or if symptoms don't respond promptly to corticosteroids, PLEX or IVIG can be used.</li> <li>PLEX involves removing and replacing the patient's plasma to remove circulating antibodies that contribute to MG.</li> <li>IVIG provides a transient modulation of the immune system and can be beneficial in acute MG exacerbations.</li> </ul> </li> <li><b>**Other Immunosuppressive</b></li> </ol> | <p>Immune checkpoint inhibitor (ICI)-associated encephalitis is a rare but serious neurological complication. It requires prompt recognition and intervention, as it can be life-threatening. Here's a general approach to the primary treatment:</p> <ol style="list-style-type: none"> <li><b>**Discontinuation of ICI**:</b> <ul style="list-style-type: none"> <li>As with other severe immune-related adverse events, the first step is to immediately discontinue the ICI.</li> </ul> </li> <li><b>**High-Dose Corticosteroids**:</b> <ul style="list-style-type: none"> <li>Given the inflammatory nature of the condition, high-dose corticosteroids are the mainstay of treatment.</li> <li><b>**Methylprednisolone**</b> is often used, with typical doses ranging from 1 to 2 g/day intravenously for 3-5 days, followed by a tapering dose of oral prednisone over several weeks.</li> <li>The duration and tapering schedule of corticosteroids can be adjusted based on the severity of symptoms and the clinical response.</li> </ul> </li> <li><b>**Plasma Exchange (PLEX) or Intravenous Immunoglobulin (IVIG)**:</b> <ul style="list-style-type: none"> <li>In cases that are refractory to corticosteroids or exhibit severe symptoms, PLEX or IVIG can be considered. These modalities help modulate the immune response and have been beneficial in other autoimmune neurological conditions.</li> </ul> </li> <li><b>**Other Immunosuppressive Agents**:</b> <ul style="list-style-type: none"> <li>If there's an inadequate response to the above treatments, or for patients who cannot tolerate corticosteroids, other immunosuppressive agents may be considered.</li> <li>Agents such as <b>**rituximab**</b> (a monoclonal antibody against CD20 on B cells) or <b>**cyclophosphamide**</b> (an alkylating agent) have been used in refractory cases of</li> </ul> </li> </ol> | <p>Patients treated with immune checkpoint inhibitors (ICIs) who develop myasthenia gravis (MG) or Guillain-Barre syndrome (GBS) often require both specific immunosuppressive treatments and supportive care measures to address the symptoms and potential complications. Here's a breakdown of supportive care treatments for these conditions:</p> <p><b>**For Myasthenia Gravis (MG):**</b></p> <ol style="list-style-type: none"> <li><b>**Respiratory Support**:</b> <ul style="list-style-type: none"> <li>Patients with MG can develop myasthenic crisis, where the respiratory muscles become too weak to maintain adequate breathing. Such patients may require <b>**mechanical ventilation**</b>.</li> <li>Regular monitoring with <b>**pulmonary function tests**</b> can help assess respiratory muscle strength and guide decisions about respiratory support.</li> </ul> </li> <li><b>**Swallowing and Nutritional Support**:</b> <ul style="list-style-type: none"> <li>Bulbar weakness can lead to difficulties in swallowing (dysphagia). This can increase the risk of aspiration and malnutrition.</li> <li>Speech therapy and a dietary consultation can help with swallowing techniques and dietary modifications.</li> <li>In severe cases, a <b>**feeding tube**</b> may be needed temporarily.</li> </ul> </li> <li><b>**Mobility and Physical Therapy**:</b> <ul style="list-style-type: none"> <li>Physical therapy can help maintain muscle strength and mobility.</li> <li>Occupational therapy can provide strategies and assistive devices to help with daily activities.</li> </ul> </li> <li><b>**Medications**:</b> <ul style="list-style-type: none"> <li><b>**Pyridostigmine**</b> can be used to improve neuromuscular transmission and alleviate symptoms.</li> </ul> </li> </ol> <p><b>**For Guillain-Barre Syndrome (GBS):**</b></p> | <p>Immune checkpoint inhibitor (ICI)-associated meningitis is a relatively rare complication, but it's crucial to consider a broad differential diagnosis when faced with symptoms suggestive of meningitis in patients treated with ICIs. Here's a breakdown of potential differential diagnoses:</p> <ol style="list-style-type: none"> <li><b>**Infectious Causes**:</b> <ul style="list-style-type: none"> <li><b>**Bacterial Meningitis**:</b> Caused by bacteria like <i>Neisseria meningitidis</i>, <i>Streptococcus pneumoniae</i>, or <i>Haemophilus influenzae</i>.</li> <li><b>**Viral Meningitis**:</b> Common culprits include enteroviruses, herpes simplex virus (HSV), varicella-zoster virus (VZV), and others.</li> <li><b>**Fungal Meningitis**:</b> Cryptococcal meningitis and others, especially in immunocompromised patients.</li> <li><b>**Tuberculous (TB) Meningitis**:</b> Especially in endemic areas or high-risk populations.</li> <li><b>**Neurosyphilis**:</b> Syphilis affecting the central nervous system.</li> </ul> </li> <li><b>**Neoplastic Meningitis (Leptomeningeal Carcinomatosis)**:</b> <ul style="list-style-type: none"> <li>Spread of malignancy to the meninges. Symptoms might overlap with meningitis, and CSF analysis can show elevated white blood cells and protein.</li> </ul> </li> <li><b>**Autoimmune/Inflammatory**:</b> <ul style="list-style-type: none"> <li><b>**Sarcoidosis**:</b> Can involve the central nervous system and mimic meningitis.</li> <li><b>**Behçet's Disease**:</b> Can have neurologic manifestations.</li> <li><b>**Systemic Lupus Erythematosus (SLE)**:</b> Neuropsychiatric lupus can present with a variety of neurological symptoms.</li> <li><b>**Vogt-Koyanagi-Harada Disease**:</b> A multisystem inflammatory disorder that can involve the meninges.</li> </ul> </li> <li><b>**Drug-induced Meningitis**:</b> <ul style="list-style-type: none"> <li>Certain drugs, apart from ICIs, can induce aseptic meningitis. Notable examples include non-steroidal anti-inflammatory drugs (NSAIDs), intravenous immunoglobulin (IVIG), and some antibiotics.</li> </ul> </li> </ol> | <p>Neurologic toxicities associated with immune checkpoint inhibitors (ICIs) can vary in severity. While some mild neurologic adverse events might warrant only close observation or temporary treatment interruption, severe or life-threatening events typically require permanent discontinuation of the ICI. Here are some indications associated with neurologic toxicities that might lead to permanent discontinuation:</p> <ol style="list-style-type: none"> <li><b>**Severe or Life-Threatening Encephalitis**:</b> Encephalitis or inflammation of the brain can present with altered mental status, seizures, focal neurologic deficits, or even coma.</li> <li><b>**Myasthenia Gravis with Respiratory Compromise**:</b> If a patient develops myasthenia gravis with symptoms of respiratory muscle weakness or if they experience a myasthenic crisis, it often necessitates discontinuation of the ICI.</li> <li><b>**Guillain-Barre Syndrome (GBS)**:</b> This autoimmune disorder can lead to rapidly progressive limb weakness and even respiratory paralysis.</li> <li><b>**Meningitis**:</b> Inflammation of the meninges, if associated with significant symptoms or complications, can be an indication for discontinuation.</li> <li><b>**Severe Neuropathies**:</b> This includes conditions such as severe peripheral neuropathy, cranial neuropathy, or autonomic neuropathy leading to significant functional impairment or associated complications.</li> <li><b>**Neurologic Conditions with Cardiac Involvement**:</b> Conditions such as myasthenia gravis or other autoimmune disorders that also manifest with cardiac involvement, like myocarditis, would typically require discontinuation due to the high risk of mortality.</li> <li><b>**Recurrent Seizures or Status Epilepticus**:</b> If a patient develops recurrent unprovoked seizures or goes into status epilepticus (prolonged seizures)</li> </ol> |

|  |                                                                                                                                                                                                                                                                                                                                                                                                                                                                                                                                                                                                                                                                                                                                                                                                                                                                                                                                                                                                                                                                                                                                                                                                                                                                                                                                                                                                                                                                                                                                                                                                                              |                                                                                                                                                                                                                                                                                                                                                                                                                                                                                                                                                                                                                                                                                                                                                                                                                                                                                                                                                                                                                                                                                                                                                                                                                                                                                                                                                                                                                                                                                                                                                                            |                                                                                                                                                                                                                                                                                                                                                                                                                                                                                                                                                                                                                                                                                                                                                                                                                                                                                                                                                                                                                                                                                                                                                                                                                                                                                                                                                                                                                                                                                                                                                                                                                                                                                                                                                                                                         |                                                                                                                                                                                                                                                                                                                                                                                                                                                                                                                                                                                                                                                                                                                                                                                                                                                                                                                                                                                                                                                               |                                                                                                                                                                                                                                                                                                                                                                                                                                                                                                                                                                                                                                                                                                                                                                                                                                                                                                                                                                                                                                                                                                                                                                                                            |
|--|------------------------------------------------------------------------------------------------------------------------------------------------------------------------------------------------------------------------------------------------------------------------------------------------------------------------------------------------------------------------------------------------------------------------------------------------------------------------------------------------------------------------------------------------------------------------------------------------------------------------------------------------------------------------------------------------------------------------------------------------------------------------------------------------------------------------------------------------------------------------------------------------------------------------------------------------------------------------------------------------------------------------------------------------------------------------------------------------------------------------------------------------------------------------------------------------------------------------------------------------------------------------------------------------------------------------------------------------------------------------------------------------------------------------------------------------------------------------------------------------------------------------------------------------------------------------------------------------------------------------------|----------------------------------------------------------------------------------------------------------------------------------------------------------------------------------------------------------------------------------------------------------------------------------------------------------------------------------------------------------------------------------------------------------------------------------------------------------------------------------------------------------------------------------------------------------------------------------------------------------------------------------------------------------------------------------------------------------------------------------------------------------------------------------------------------------------------------------------------------------------------------------------------------------------------------------------------------------------------------------------------------------------------------------------------------------------------------------------------------------------------------------------------------------------------------------------------------------------------------------------------------------------------------------------------------------------------------------------------------------------------------------------------------------------------------------------------------------------------------------------------------------------------------------------------------------------------------|---------------------------------------------------------------------------------------------------------------------------------------------------------------------------------------------------------------------------------------------------------------------------------------------------------------------------------------------------------------------------------------------------------------------------------------------------------------------------------------------------------------------------------------------------------------------------------------------------------------------------------------------------------------------------------------------------------------------------------------------------------------------------------------------------------------------------------------------------------------------------------------------------------------------------------------------------------------------------------------------------------------------------------------------------------------------------------------------------------------------------------------------------------------------------------------------------------------------------------------------------------------------------------------------------------------------------------------------------------------------------------------------------------------------------------------------------------------------------------------------------------------------------------------------------------------------------------------------------------------------------------------------------------------------------------------------------------------------------------------------------------------------------------------------------------|---------------------------------------------------------------------------------------------------------------------------------------------------------------------------------------------------------------------------------------------------------------------------------------------------------------------------------------------------------------------------------------------------------------------------------------------------------------------------------------------------------------------------------------------------------------------------------------------------------------------------------------------------------------------------------------------------------------------------------------------------------------------------------------------------------------------------------------------------------------------------------------------------------------------------------------------------------------------------------------------------------------------------------------------------------------|------------------------------------------------------------------------------------------------------------------------------------------------------------------------------------------------------------------------------------------------------------------------------------------------------------------------------------------------------------------------------------------------------------------------------------------------------------------------------------------------------------------------------------------------------------------------------------------------------------------------------------------------------------------------------------------------------------------------------------------------------------------------------------------------------------------------------------------------------------------------------------------------------------------------------------------------------------------------------------------------------------------------------------------------------------------------------------------------------------------------------------------------------------------------------------------------------------|
|  | <p><b>Agents**:</b><br/>- In cases refractory to corticosteroids or for steroid-sparing purposes, other immunosuppressive medications can be considered. Commonly used agents include azathioprine, mycophenolate mofetil, and cyclosporine.<br/>- It's essential to monitor for potential side effects and drug interactions with these agents.</p> <p><b>5. **Pyridostigmine**:</b><br/>- An acetylcholinesterase inhibitor that can improve neuromuscular transmission and alleviate symptoms.<br/>- It's mainly used for symptomatic relief and does not address the underlying autoimmune process.</p> <p><b>6. **Supportive Measures**:</b><br/>- For patients with bulbar symptoms (affecting speech or swallowing), speech therapy and dietary modifications can be beneficial.<br/>- Mechanical ventilation might be required for patients in myasthenic crisis with respiratory failure.</p> <p><b>7. **Monitor for Associated Complications**:</b><br/>- Patients with ICI-associated MG can have concurrent myocarditis or other immune-related adverse events. It's crucial to monitor for these conditions and manage them aggressively if they occur.</p> <p><b>8. **Close Monitoring**:</b><br/>- Regular clinical assessments, pulmonary function tests, and other necessary diagnostics should be performed to gauge the treatment response and adjust therapies accordingly.</p> <p><b>9. **Consultation**:</b><br/>- Due to the complexity and potential severity of ICI-associated MG, collaboration with a neurologist, especially one specializing in neuromuscular disorders, is recommended for</p> | <p>autoimmune encephalitis, though data specific to ICI-associated encephalitis are limited.</p> <p><b>5. **Supportive Care**:</b><br/>- Symptomatic treatments for seizures, agitation, or other neurological symptoms may be required.<br/>- For patients with altered consciousness, maintaining the airway and avoiding complications like aspiration are crucial. Some patients might require admission to an intensive care unit for close monitoring or support.</p> <p><b>6. **Diagnostic Workup**:</b><br/>- While this is more of a diagnostic than a treatment measure, it's essential to rule out other potential causes of encephalitis. This might include lumbar puncture for cerebrospinal fluid analysis, MRI of the brain, and tests for infectious etiologies.<br/>- Screening for other concurrent immune-related adverse events, especially those that can be associated with neurological symptoms (like myasthenia gravis or myocarditis), is crucial.</p> <p><b>7. **Consultation**:</b><br/>- Given the complexity of neurological symptoms and the potential severity of encephalitis, consultation with a neurologist is crucial. Involvement of other specialists, such as a rheumatologist or infectious disease specialist, might also be beneficial, depending on the clinical scenario.</p> <p>It's crucial to approach ICI-associated encephalitis aggressively and in a multidisciplinary manner. Early recognition, intervention, and close monitoring can improve outcomes and reduce the risk of long-term neurological sequelae.</p> | <p><b>1. **Respiratory Support**:</b><br/>- Respiratory failure is a potential complication due to the paralysis of respiratory muscles. Patients might need <b>**mechanical ventilation**</b>.<br/>- <b>**Pulmonary function tests**</b> are used to monitor respiratory muscle function.</p> <p><b>2. **Mobility and Physical Therapy**:</b><br/>- Given the muscle weakness and paralysis associated with GBS, physical therapy is essential to prevent muscle atrophy and joint contractures.<br/>- As patients recover, rehabilitation can help regain strength and function.</p> <p><b>3. **Pain Management**:</b><br/>- Many GBS patients experience significant neuropathic pain. Pain management with medications like acetaminophen, NSAIDs, gabapentin, or pregabalin can be helpful.<br/>- Occasionally, more potent analgesics or specific interventions might be required.</p> <p><b>4. **Nutritional Support**:</b><br/>- Swallowing difficulties or facial muscle weakness might interfere with eating. Nutritional support, potentially including a feeding tube, might be required.</p> <p><b>5. **Bladder and Bowel Care**:</b><br/>- Some GBS patients may have urinary retention or other bladder issues, requiring catheterization.<br/>- Bowel regimens can prevent constipation, which can be a concern due to mobility limitations and certain medications.</p> <p><b>6. **Psychological Support**:</b><br/>- Being diagnosed with a rapidly progressing neurological condition can be emotionally challenging. Psychological support, counseling, or psychiatric consultation can be beneficial.</p> <p><b>7. **Deep Vein Thrombosis (DVT) Prophylaxis**:</b><br/>- Immobility increases the risk of DVT. Prophylactic anticoagulation, pneumatic compression devices, or</p> | <p><b>5. **Vascular**:</b><br/>- <b>**Cerebral Venous Sinus Thrombosis (CVST)**</b>: Can present with signs of increased intracranial pressure and mimic some meningitis symptoms.<br/>- <b>**Subarachnoid Hemorrhage**</b>: Acute bleeding into the subarachnoid space can present with a sudden, severe headache and neck stiffness.</p> <p><b>6. **Other**:</b><br/>- <b>**Migraine**</b>: Some migraines can present with neck stiffness and be mistaken initially for meningitis.<br/>- <b>**Post-infectious/Post-vaccination**</b>: A reaction following an infection or vaccination, causing inflammation of the meninges.</p> <p>When evaluating a patient with suspected ICI-associated meningitis, it's essential to obtain a detailed history, perform a thorough neurological examination, and use appropriate diagnostic tests, including lumbar puncture with cerebrospinal fluid (CSF) analysis, to distinguish between these possibilities. The correct identification of the underlying cause is crucial to guide appropriate treatment.</p> | <p>related to the ICI, this might be an indication for permanent discontinuation.</p> <p><b>8. **Presumed Immune-Mediated Conditions Unresponsive to Standard Interventions**</b>: If a patient develops a neurologic condition believed to be immune-mediated and it doesn't improve or stabilize with corticosteroids or other immunosuppressive therapies, discontinuation of the ICI might be warranted.</p> <p><b>9. **Conditions with Severe Functional Impairment**</b>: Any neurologic condition that results in severe disability or functional impairment, impacting the patient's quality of life or ability to perform activities of daily living, could be considered an indication for discontinuation.</p> <p>The decision to permanently discontinue an ICI due to neurologic toxicities should be individualized and made collaboratively. It involves weighing the potential risks and benefits of continued therapy, considering the severity of the neurologic event, the overall prognosis, available alternative treatments, and the patient's preferences. Collaboration between oncologists, neurologists, and other relevant specialists is essential to ensure optimal care.</p> |
|--|------------------------------------------------------------------------------------------------------------------------------------------------------------------------------------------------------------------------------------------------------------------------------------------------------------------------------------------------------------------------------------------------------------------------------------------------------------------------------------------------------------------------------------------------------------------------------------------------------------------------------------------------------------------------------------------------------------------------------------------------------------------------------------------------------------------------------------------------------------------------------------------------------------------------------------------------------------------------------------------------------------------------------------------------------------------------------------------------------------------------------------------------------------------------------------------------------------------------------------------------------------------------------------------------------------------------------------------------------------------------------------------------------------------------------------------------------------------------------------------------------------------------------------------------------------------------------------------------------------------------------|----------------------------------------------------------------------------------------------------------------------------------------------------------------------------------------------------------------------------------------------------------------------------------------------------------------------------------------------------------------------------------------------------------------------------------------------------------------------------------------------------------------------------------------------------------------------------------------------------------------------------------------------------------------------------------------------------------------------------------------------------------------------------------------------------------------------------------------------------------------------------------------------------------------------------------------------------------------------------------------------------------------------------------------------------------------------------------------------------------------------------------------------------------------------------------------------------------------------------------------------------------------------------------------------------------------------------------------------------------------------------------------------------------------------------------------------------------------------------------------------------------------------------------------------------------------------------|---------------------------------------------------------------------------------------------------------------------------------------------------------------------------------------------------------------------------------------------------------------------------------------------------------------------------------------------------------------------------------------------------------------------------------------------------------------------------------------------------------------------------------------------------------------------------------------------------------------------------------------------------------------------------------------------------------------------------------------------------------------------------------------------------------------------------------------------------------------------------------------------------------------------------------------------------------------------------------------------------------------------------------------------------------------------------------------------------------------------------------------------------------------------------------------------------------------------------------------------------------------------------------------------------------------------------------------------------------------------------------------------------------------------------------------------------------------------------------------------------------------------------------------------------------------------------------------------------------------------------------------------------------------------------------------------------------------------------------------------------------------------------------------------------------|---------------------------------------------------------------------------------------------------------------------------------------------------------------------------------------------------------------------------------------------------------------------------------------------------------------------------------------------------------------------------------------------------------------------------------------------------------------------------------------------------------------------------------------------------------------------------------------------------------------------------------------------------------------------------------------------------------------------------------------------------------------------------------------------------------------------------------------------------------------------------------------------------------------------------------------------------------------------------------------------------------------------------------------------------------------|------------------------------------------------------------------------------------------------------------------------------------------------------------------------------------------------------------------------------------------------------------------------------------------------------------------------------------------------------------------------------------------------------------------------------------------------------------------------------------------------------------------------------------------------------------------------------------------------------------------------------------------------------------------------------------------------------------------------------------------------------------------------------------------------------------------------------------------------------------------------------------------------------------------------------------------------------------------------------------------------------------------------------------------------------------------------------------------------------------------------------------------------------------------------------------------------------------|

|  |                                                                                                                                                                                                                                                               |  |                                                                                                                                                                                                                                                                                                                                                                                                                                                                                                                                                                                                                                                                                                                                                                                                                         |  |  |
|--|---------------------------------------------------------------------------------------------------------------------------------------------------------------------------------------------------------------------------------------------------------------|--|-------------------------------------------------------------------------------------------------------------------------------------------------------------------------------------------------------------------------------------------------------------------------------------------------------------------------------------------------------------------------------------------------------------------------------------------------------------------------------------------------------------------------------------------------------------------------------------------------------------------------------------------------------------------------------------------------------------------------------------------------------------------------------------------------------------------------|--|--|
|  | <p>comprehensive management.</p> <p>It's worth noting that ICI-associated MG can be more aggressive than idiopathic MG, and the risk of complications like myasthenic crisis is higher. As such, aggressive treatment and close monitoring are paramount.</p> |  | <p>compression stockings can be used based on the individual patient's risk.</p> <p><b>**For Both Conditions:**</b></p> <p>- <b>**Monitor for Medication Side Effects**</b>: Both conditions often require treatments with potential side effects, like corticosteroids. Regular monitoring for hyperglycemia, hypertension, infections, and other side effects is essential.</p> <p>- <b>**Patient Education**</b>: It's vital to educate patients and caregivers about the conditions, potential complications, and warning signs to look for, such as worsening weakness or breathing difficulties.</p> <p>Given the complexity and potential severity of these conditions, multidisciplinary care involving neurologists, physical therapists, respiratory therapists, and other specialists is often required.</p> |  |  |
|--|---------------------------------------------------------------------------------------------------------------------------------------------------------------------------------------------------------------------------------------------------------------|--|-------------------------------------------------------------------------------------------------------------------------------------------------------------------------------------------------------------------------------------------------------------------------------------------------------------------------------------------------------------------------------------------------------------------------------------------------------------------------------------------------------------------------------------------------------------------------------------------------------------------------------------------------------------------------------------------------------------------------------------------------------------------------------------------------------------------------|--|--|

|                           | Cardiac Toxicity                                                                                                                                                                                                                                                                                                                                                                                                                                                                                                                                                                                                                                                                                                                                                                                                                                                                                                                                                                                                                                                                                                                                                                                                                                                                                                                                                                                                                                                                                                                                                                                                                                                                                                                                                         | Cardiac Toxicity                                                                                                                                                                                                                                                                                                                                                                                                                                                                                                                                                                                                                                                                                                                                                                                                                                                                                                                                                                                                                                                                                                                                                                                                                                                                                                                                                                                                                                                                                                                                                                                                                                                                                                                                                                                                                                                                                                                                                                                                | Cardiac Toxicity                                                                                                                                                                                                                                                                                                                                                                                                                                                                                                                                                                                                                                                                                                                                                                                                                                                                                                                                                                                                                                                                                                                                                                                                                                                                                                                                                                                                                                                                                                                                                                                                                                                                                                                                                                                                                                                                                                                                                                                                 | Cardiac Toxicity                                                                                                                                                                                                                                                                                                                                                                                                                                                                                                                                                                                                                                                                                                                                                                                                                                                                                                                                                                                                                                                                                                                                                                                                                                                                                                                                                                                                                                                                                                                                                                                                                                                                                                                                                                                                                                                                                                   | Cardiac Toxicity                                                                                                                                                                                                                                                                                                                                                                                                                                                                                                                                                                                                                                                                                                                                                                                                                                                                                                                                                                                                                                                                                                                                                                                                                                                                                                                                                                                                                                                                                                                                                                                                                                                                                                                                                                                                                                                                                                                                                                                                                                                                                                                                                                                                                                                                         |
|---------------------------|--------------------------------------------------------------------------------------------------------------------------------------------------------------------------------------------------------------------------------------------------------------------------------------------------------------------------------------------------------------------------------------------------------------------------------------------------------------------------------------------------------------------------------------------------------------------------------------------------------------------------------------------------------------------------------------------------------------------------------------------------------------------------------------------------------------------------------------------------------------------------------------------------------------------------------------------------------------------------------------------------------------------------------------------------------------------------------------------------------------------------------------------------------------------------------------------------------------------------------------------------------------------------------------------------------------------------------------------------------------------------------------------------------------------------------------------------------------------------------------------------------------------------------------------------------------------------------------------------------------------------------------------------------------------------------------------------------------------------------------------------------------------------|-----------------------------------------------------------------------------------------------------------------------------------------------------------------------------------------------------------------------------------------------------------------------------------------------------------------------------------------------------------------------------------------------------------------------------------------------------------------------------------------------------------------------------------------------------------------------------------------------------------------------------------------------------------------------------------------------------------------------------------------------------------------------------------------------------------------------------------------------------------------------------------------------------------------------------------------------------------------------------------------------------------------------------------------------------------------------------------------------------------------------------------------------------------------------------------------------------------------------------------------------------------------------------------------------------------------------------------------------------------------------------------------------------------------------------------------------------------------------------------------------------------------------------------------------------------------------------------------------------------------------------------------------------------------------------------------------------------------------------------------------------------------------------------------------------------------------------------------------------------------------------------------------------------------------------------------------------------------------------------------------------------------|------------------------------------------------------------------------------------------------------------------------------------------------------------------------------------------------------------------------------------------------------------------------------------------------------------------------------------------------------------------------------------------------------------------------------------------------------------------------------------------------------------------------------------------------------------------------------------------------------------------------------------------------------------------------------------------------------------------------------------------------------------------------------------------------------------------------------------------------------------------------------------------------------------------------------------------------------------------------------------------------------------------------------------------------------------------------------------------------------------------------------------------------------------------------------------------------------------------------------------------------------------------------------------------------------------------------------------------------------------------------------------------------------------------------------------------------------------------------------------------------------------------------------------------------------------------------------------------------------------------------------------------------------------------------------------------------------------------------------------------------------------------------------------------------------------------------------------------------------------------------------------------------------------------------------------------------------------------------------------------------------------------|--------------------------------------------------------------------------------------------------------------------------------------------------------------------------------------------------------------------------------------------------------------------------------------------------------------------------------------------------------------------------------------------------------------------------------------------------------------------------------------------------------------------------------------------------------------------------------------------------------------------------------------------------------------------------------------------------------------------------------------------------------------------------------------------------------------------------------------------------------------------------------------------------------------------------------------------------------------------------------------------------------------------------------------------------------------------------------------------------------------------------------------------------------------------------------------------------------------------------------------------------------------------------------------------------------------------------------------------------------------------------------------------------------------------------------------------------------------------------------------------------------------------------------------------------------------------------------------------------------------------------------------------------------------------------------------------------------------------------------------------------------------------------------------------------------------------------------------------------------------------------------------------------------------------|------------------------------------------------------------------------------------------------------------------------------------------------------------------------------------------------------------------------------------------------------------------------------------------------------------------------------------------------------------------------------------------------------------------------------------------------------------------------------------------------------------------------------------------------------------------------------------------------------------------------------------------------------------------------------------------------------------------------------------------------------------------------------------------------------------------------------------------------------------------------------------------------------------------------------------------------------------------------------------------------------------------------------------------------------------------------------------------------------------------------------------------------------------------------------------------------------------------------------------------------------------------------------------------------------------------------------------------------------------------------------------------------------------------------------------------------------------------------------------------------------------------------------------------------------------------------------------------------------------------------------------------------------------------------------------------------------------------------------------------------------------------------------------------------------------------------------------------------------------------------------------------------------------------------------------------------------------------------------------------------------------------------------------------------------------------------------------------------------------------------------------------------------------------------------------------------------------------------------------------------------------------------------------------|
| Question                  | What initial screening tests should be ordered if immune checkpoint inhibitor associated myocarditis is suspected?                                                                                                                                                                                                                                                                                                                                                                                                                                                                                                                                                                                                                                                                                                                                                                                                                                                                                                                                                                                                                                                                                                                                                                                                                                                                                                                                                                                                                                                                                                                                                                                                                                                       | What are the life threatening consequences of immune checkpoint inhibitor associated myocarditis?                                                                                                                                                                                                                                                                                                                                                                                                                                                                                                                                                                                                                                                                                                                                                                                                                                                                                                                                                                                                                                                                                                                                                                                                                                                                                                                                                                                                                                                                                                                                                                                                                                                                                                                                                                                                                                                                                                               | What are the primary treatments for immune checkpoint inhibitor associated myocarditis?                                                                                                                                                                                                                                                                                                                                                                                                                                                                                                                                                                                                                                                                                                                                                                                                                                                                                                                                                                                                                                                                                                                                                                                                                                                                                                                                                                                                                                                                                                                                                                                                                                                                                                                                                                                                                                                                                                                          | What supportive management strategies should be undertaken when immune checkpoint inhibitor associated myocarditis is suspected?                                                                                                                                                                                                                                                                                                                                                                                                                                                                                                                                                                                                                                                                                                                                                                                                                                                                                                                                                                                                                                                                                                                                                                                                                                                                                                                                                                                                                                                                                                                                                                                                                                                                                                                                                                                   | What are other potential cardiovascular toxicities from immune checkpoint inhibitors other than myocarditis?                                                                                                                                                                                                                                                                                                                                                                                                                                                                                                                                                                                                                                                                                                                                                                                                                                                                                                                                                                                                                                                                                                                                                                                                                                                                                                                                                                                                                                                                                                                                                                                                                                                                                                                                                                                                                                                                                                                                                                                                                                                                                                                                                                             |
| Answer Engine 1 (ChatGPT) | <p>If immune checkpoint inhibitor (ICI)-associated myocarditis is suspected, prompt evaluation is crucial given the potential for rapid progression and high mortality associated with this condition. Here are the initial screening tests that should be ordered:</p> <ol style="list-style-type: none"> <li><b>Cardiac Biomarkers</b>: <ul style="list-style-type: none"> <li><b>Troponin T or I</b>: Elevated levels indicate myocardial injury and are often significantly raised in myocarditis.</li> <li><b>Brain Natriuretic Peptide (BNP) or N-terminal pro B-type Natriuretic Peptide (NT-proBNP)</b>: These can be elevated due to myocardial stress and are markers for heart failure.</li> </ul> </li> <li><b>Electrocardiogram (ECG)</b>: <ul style="list-style-type: none"> <li>To evaluate for arrhythmias, ST-segment changes, or other electrical abnormalities that might be suggestive of myocarditis or ischemia.</li> </ul> </li> <li><b>Echocardiogram</b>: <ul style="list-style-type: none"> <li>To assess left and right ventricular function, wall motion abnormalities, and other structural heart changes.</li> <li>Can help in identifying reduced ejection fraction, diastolic dysfunction, or pericardial effusions, all of which can be seen in myocarditis.</li> </ul> </li> <li><b>Cardiac Magnetic Resonance Imaging (CMR)</b>: <ul style="list-style-type: none"> <li>If the above tests are suggestive of myocarditis, CMR can be highly valuable.</li> <li>It can detect myocardial inflammation, edema, necrosis, or fibrosis, making it a crucial tool for the diagnosis of myocarditis.</li> <li>Late gadolinium enhancement (LGE) can be particularly indicative of myocardial injury or inflammation.</li> </ul> </li> </ol> | <p>Immune checkpoint inhibitor (ICI)-associated myocarditis is a particularly concerning adverse event due to its potential for rapid progression and life-threatening consequences. The mortality rate can be high if not recognized and treated promptly. Here are the life-threatening consequences of ICI-associated myocarditis:</p> <ol style="list-style-type: none"> <li><b>Heart Failure</b>: <ul style="list-style-type: none"> <li>Acute myocardial inflammation can lead to both systolic and diastolic dysfunction, resulting in congestive heart failure. This can manifest as shortness of breath, edema, fatigue, and fluid overload.</li> </ul> </li> <li><b>Arrhythmias</b>: <ul style="list-style-type: none"> <li>Myocarditis can lead to various arrhythmias, both benign and life-threatening.</li> <li><b>Ventricular arrhythmias</b>, such as ventricular tachycardia or fibrillation, are particularly concerning due to the risk of sudden cardiac death.</li> <li>Atrioventricular (AV) block or other conduction abnormalities can occur, potentially requiring temporary or permanent pacemaker placement.</li> </ul> </li> <li><b>Cardiogenic Shock</b>: <ul style="list-style-type: none"> <li>Severe myocarditis can lead to a significant drop in cardiac output, resulting in cardiogenic shock. This is a critical condition where the heart can't pump enough blood to meet the body's needs, leading to organ failure.</li> </ul> </li> <li><b>Cardiac Tamponade</b>: <ul style="list-style-type: none"> <li>Inflammation of the heart can extend to the pericardium, leading to pericarditis. Fluid can accumulate in the pericardial space, leading to cardiac tamponade, a condition where the heart is compressed, impairing its ability to pump blood effectively.</li> </ul> </li> <li><b>Sudden Cardiac Death</b>: <ul style="list-style-type: none"> <li>Patients with myocarditis are at risk for sudden cardiac death, especially if they</li> </ul> </li> </ol> | <p>Immune checkpoint inhibitor (ICI)-associated myocarditis is a severe and potentially life-threatening condition that requires immediate and aggressive treatment. Here are the primary treatments for ICI-associated myocarditis:</p> <ol style="list-style-type: none"> <li><b>Discontinuation of ICI</b>: <ul style="list-style-type: none"> <li>The first step is to immediately discontinue the immune checkpoint inhibitor.</li> </ul> </li> <li><b>High-Dose Corticosteroids</b>: <ul style="list-style-type: none"> <li>High-dose corticosteroids are the mainstay of treatment to suppress the inflammatory response.</li> <li><b>Methylprednisolone</b> is commonly used at doses of 1 to 2 g/day intravenously, depending on the severity of myocarditis. This is typically followed by a tapering dose of oral prednisone over several weeks.</li> <li>Close monitoring is required, as corticosteroids can exacerbate heart failure in some cases.</li> </ul> </li> <li><b>Additional Immunosuppressive Agents</b>: <ul style="list-style-type: none"> <li>For patients who don't respond to corticosteroids or have contraindications to their use, additional immunosuppressive agents might be required.</li> <li><b>Infliximab</b>, a TNF-alpha inhibitor, is sometimes used, especially if there's concurrent colitis. However, there's a concern about potential worsening of heart failure with infliximab.</li> <li>Other agents like <b>mycophenolate mofetil</b>, <b>azathioprine</b>, or <b>cyclosporine</b> can be considered, though data specific to ICI-associated myocarditis are limited.</li> <li><b>Intravenous immunoglobulin (IVIG)</b> has also been used in some cases.</li> </ul> </li> <li><b>Supportive Measures</b>: <ul style="list-style-type: none"> <li><b>Heart Failure Management</b>: This includes the use of diuretics, ACE inhibitors or ARBs, beta-blockers, and other standard heart failure treatments.</li> <li><b>Arrhythmia</b></li> </ul> </li> </ol> | <p>When immune checkpoint inhibitor (ICI)-associated myocarditis is suspected, it's essential to act quickly given the potential for rapid progression and life-threatening complications. Alongside specific treatments, several supportive management strategies should be undertaken:</p> <ol style="list-style-type: none"> <li><b>Hospitalization</b>: <ul style="list-style-type: none"> <li>Patients should be admitted to the hospital for close monitoring, preferably in a unit with telemetry capabilities due to the risk of arrhythmias.</li> </ul> </li> <li><b>Hemodynamic Monitoring</b>: <ul style="list-style-type: none"> <li>Monitor vital signs closely, including heart rate, blood pressure, and oxygen saturation.</li> <li>In some cases, invasive monitoring, like a Swan-Ganz catheter, might be necessary to guide therapy, especially in cases of cardiogenic shock.</li> </ul> </li> <li><b>Electrocardiogram (ECG)</b>: <ul style="list-style-type: none"> <li>Regular ECG monitoring can help detect arrhythmias, conduction abnormalities, or ischemic changes.</li> </ul> </li> <li><b>Serial Biomarker Testing</b>: <ul style="list-style-type: none"> <li>Repeated measurements of cardiac biomarkers like troponin and BNP or NT-proBNP can help assess the progression of myocardial injury and the response to treatment.</li> </ul> </li> <li><b>Echocardiographic Assessment</b>: <ul style="list-style-type: none"> <li>Regular echocardiograms can monitor cardiac function, assess for wall motion abnormalities, and identify potential complications like pericardial effusion.</li> </ul> </li> <li><b>Management of Arrhythmias</b>: <ul style="list-style-type: none"> <li>Initiate appropriate treatment for any detected arrhythmias.</li> <li>Temporary or permanent pacemaker insertion might be necessary for high-grade heart block.</li> </ul> </li> </ol> | <p>Immune checkpoint inhibitors (ICIs) have revolutionized the treatment of several cancers, but they can also induce a range of immune-related adverse events, including cardiovascular toxicities. While myocarditis is one of the most recognized and serious cardiovascular complications, ICIs can lead to other cardiovascular toxicities as well:</p> <ol style="list-style-type: none"> <li><b>Pericarditis</b>: <ul style="list-style-type: none"> <li>Inflammation of the pericardium, which can present with chest pain, pericardial effusion, and, in severe cases, cardiac tamponade.</li> </ul> </li> <li><b>Vasculitis</b>: <ul style="list-style-type: none"> <li>Inflammation of the blood vessels. This can affect any size vessel and can lead to complications based on the vessels involved. For instance, large vessel vasculitis can cause symptoms like claudication, while small vessel vasculitis might manifest with skin rashes or renal involvement.</li> </ul> </li> <li><b>Arrhythmias</b>: <ul style="list-style-type: none"> <li>ICIs can induce various arrhythmias, both benign and life-threatening. The mechanisms can be multifactorial, ranging from direct myocardial involvement to electrolyte imbalances from associated conditions.</li> </ul> </li> <li><b>Heart Failure</b>: <ul style="list-style-type: none"> <li>Can occur as a direct result of myocarditis or due to other mechanisms like stress cardiomyopathy.</li> </ul> </li> <li><b>Ischemic Heart Disease</b>: <ul style="list-style-type: none"> <li>There are reports of ICIs leading to acute coronary syndromes, including myocardial infarction, though the exact mechanism is not well understood.</li> </ul> </li> <li><b>Hypertension</b>: <ul style="list-style-type: none"> <li>Some patients on ICIs can develop new-onset hypertension or worsening of pre-existing hypertension. This can be related to the ICI itself or secondary to other complications like kidney injury.</li> </ul> </li> <li><b>Thromboembolic Events</b>: <ul style="list-style-type: none"> <li>There's an increased risk of both venous and arterial thromboembolic events in patients on ICIs, including deep vein thrombosis, pulmonary embolism, and strokes.</li> </ul> </li> </ol> |

|  |                                                                                                                                                                                                                                                                                                                                                                                                                                                                                                                                                                                                                                                                                                                                                                                                                                                                                                                                                                                                                                                                                                                                                                                                                                                                                                                                                                                                                                                                                                                                                                                                                                                            |                                                                                                                                                                                                                                                                                                                                                                                                                                                                                                                                                                                                                                                                                                                                                                                                                                                                                                                                                                                                                                                                                                                                 |                                                                                                                                                                                                                                                                                                                                                                                                                                                                                                                                                                                                                                                                                                                                                                                                                                                                                                                                                                                                                                                                                                                                                                                                                                                                                                                                                                                                                                                                                                                                                                                                                                                                   |                                                                                                                                                                                                                                                                                                                                                                                                                                                                                                                                                                                                                                                                                                                                                                                                                                                                                                                                                                                                                                                                                                                                                                                                                                                                                                                                                                                                                                                                                                                                                                                                                                                                                                                                                                                                                                                                                                                                                                                                                                                                                                                                                                       |                                                                                                                                                                                                                                                                                                                                                                                                                                                                                                                                                                                                                                                                                                                                                                                                                                                                                                                                                                                                                                                                                                                                                                                                                                                                                               |
|--|------------------------------------------------------------------------------------------------------------------------------------------------------------------------------------------------------------------------------------------------------------------------------------------------------------------------------------------------------------------------------------------------------------------------------------------------------------------------------------------------------------------------------------------------------------------------------------------------------------------------------------------------------------------------------------------------------------------------------------------------------------------------------------------------------------------------------------------------------------------------------------------------------------------------------------------------------------------------------------------------------------------------------------------------------------------------------------------------------------------------------------------------------------------------------------------------------------------------------------------------------------------------------------------------------------------------------------------------------------------------------------------------------------------------------------------------------------------------------------------------------------------------------------------------------------------------------------------------------------------------------------------------------------|---------------------------------------------------------------------------------------------------------------------------------------------------------------------------------------------------------------------------------------------------------------------------------------------------------------------------------------------------------------------------------------------------------------------------------------------------------------------------------------------------------------------------------------------------------------------------------------------------------------------------------------------------------------------------------------------------------------------------------------------------------------------------------------------------------------------------------------------------------------------------------------------------------------------------------------------------------------------------------------------------------------------------------------------------------------------------------------------------------------------------------|-------------------------------------------------------------------------------------------------------------------------------------------------------------------------------------------------------------------------------------------------------------------------------------------------------------------------------------------------------------------------------------------------------------------------------------------------------------------------------------------------------------------------------------------------------------------------------------------------------------------------------------------------------------------------------------------------------------------------------------------------------------------------------------------------------------------------------------------------------------------------------------------------------------------------------------------------------------------------------------------------------------------------------------------------------------------------------------------------------------------------------------------------------------------------------------------------------------------------------------------------------------------------------------------------------------------------------------------------------------------------------------------------------------------------------------------------------------------------------------------------------------------------------------------------------------------------------------------------------------------------------------------------------------------|-----------------------------------------------------------------------------------------------------------------------------------------------------------------------------------------------------------------------------------------------------------------------------------------------------------------------------------------------------------------------------------------------------------------------------------------------------------------------------------------------------------------------------------------------------------------------------------------------------------------------------------------------------------------------------------------------------------------------------------------------------------------------------------------------------------------------------------------------------------------------------------------------------------------------------------------------------------------------------------------------------------------------------------------------------------------------------------------------------------------------------------------------------------------------------------------------------------------------------------------------------------------------------------------------------------------------------------------------------------------------------------------------------------------------------------------------------------------------------------------------------------------------------------------------------------------------------------------------------------------------------------------------------------------------------------------------------------------------------------------------------------------------------------------------------------------------------------------------------------------------------------------------------------------------------------------------------------------------------------------------------------------------------------------------------------------------------------------------------------------------------------------------------------------------|-----------------------------------------------------------------------------------------------------------------------------------------------------------------------------------------------------------------------------------------------------------------------------------------------------------------------------------------------------------------------------------------------------------------------------------------------------------------------------------------------------------------------------------------------------------------------------------------------------------------------------------------------------------------------------------------------------------------------------------------------------------------------------------------------------------------------------------------------------------------------------------------------------------------------------------------------------------------------------------------------------------------------------------------------------------------------------------------------------------------------------------------------------------------------------------------------------------------------------------------------------------------------------------------------|
|  | <p>5. <b>**Laboratory Workup**</b>:</p> <ul style="list-style-type: none"> <li>- <b>**Complete Blood Count (CBC)**</b>: To evaluate for other causes of illness, like infection.</li> <li>- <b>**Basic Metabolic Panel (BMP)**</b>: To assess kidney function and electrolytes.</li> <li>- <b>**Inflammatory Markers**</b>: Such as erythrocyte sedimentation rate (ESR) and C-reactive protein (CRP), which can be elevated in inflammatory conditions.</li> <li>- <b>**Viral Serologies**</b>: To rule out viral etiologies of myocarditis, such as coxsackievirus, adenovirus, and others.</li> </ul> <p>6. <b>**Endomyocardial Biopsy**</b>:</p> <ul style="list-style-type: none"> <li>- While it's not typically part of the initial screening, it's the gold standard for the diagnosis of myocarditis. It involves taking small tissue samples of the heart muscle for histological analysis.</li> <li>- It might be considered if the diagnosis is uncertain and can provide definitive evidence of myocarditis, including specific histological and immunohistochemical patterns.</li> </ul> <p>7. <b>**Other Imaging**</b>:</p> <ul style="list-style-type: none"> <li>- <b>**Chest X-ray**</b>: To rule out other causes of symptoms, such as pneumonia or heart failure (manifested by cardiomegaly or pulmonary edema).</li> </ul> <p>Patients suspected of having ICI-associated myocarditis should be admitted to the hospital for close monitoring, especially given the risk of arrhythmias and heart failure. Collaboration with a cardiologist is essential for guiding further diagnostic evaluation, monitoring, and management.</p> | <p>develop dangerous arrhythmias or severe heart failure.</p> <p>6. <b>**Myocardial Fibrosis**</b>:</p> <ul style="list-style-type: none"> <li>- While not acutely life-threatening, persistent inflammation can lead to fibrosis or scarring of the cardiac muscle. This can result in long-term cardiac dysfunction and increase the risk of heart failure and arrhythmias in the future.</li> </ul> <p>7. <b>**Co-occurrence with Other Immune-related Adverse Events**</b>:</p> <ul style="list-style-type: none"> <li>- ICI-associated myocarditis can occur alongside other immune-related complications, such as myositis or pneumonitis. The combination can compound the severity of the clinical picture and increase the risk of life-threatening outcomes.</li> </ul> <p>Given these serious consequences, any suspicion of ICI-associated myocarditis should lead to prompt hospitalization, comprehensive evaluation, and aggressive management. Early detection and intervention are crucial for improving outcomes and reducing mortality. Collaboration with a cardiologist is essential for optimal care.</p> | <p>Management**:</p> <p>Antiarrhythmic medications or procedures might be required, depending on the type of arrhythmia. Patients with high-grade heart block may require a temporary or permanent pacemaker.</p> <ul style="list-style-type: none"> <li>- <b>**Cardiogenic Shock**</b>: In severe cases, mechanical circulatory support, such as an intra-aortic balloon pump (IABP) or extracorporeal membrane oxygenation (ECMO), might be needed.</li> </ul> <p>5. <b>**Monitoring**</b>:</p> <ul style="list-style-type: none"> <li>- Hospitalization with telemetry monitoring is typically required due to the risk of arrhythmias.</li> <li>- Serial measurements of cardiac biomarkers (like troponin) and echocardiographic assessments are crucial to monitor disease progression and treatment response.</li> </ul> <p>6. <b>**Endomyocardial Biopsy**</b>:</p> <ul style="list-style-type: none"> <li>- While it's primarily a diagnostic tool, endomyocardial biopsy can provide definitive evidence of myocarditis and might guide therapy by identifying specific histological and immunohistochemical patterns.</li> </ul> <p>7. <b>**Avoidance of Potential Triggers**</b>:</p> <ul style="list-style-type: none"> <li>- Any medications that might exacerbate heart failure or arrhythmias should be avoided or used with caution.</li> </ul> <p>Given the seriousness of ICI-associated myocarditis, a multidisciplinary approach involving oncologists, cardiologists, and possibly other specialists is essential for optimal patient management. Early recognition and aggressive treatment can improve outcomes and reduce mortality.</p> | <p>7. <b>**Fluid and Volume Management**</b>:</p> <ul style="list-style-type: none"> <li>- Carefully manage fluid status, as patients may be at risk for both fluid overload (due to heart failure) and hypoperfusion (due to decreased cardiac output).</li> <li>- Diuretics can be used to manage fluid overload.</li> </ul> <p>8. <b>**Oxygen and Respiratory Support**</b>:</p> <ul style="list-style-type: none"> <li>- Provide supplemental oxygen as needed. In cases of severe heart failure or cardiogenic shock, more advanced respiratory support, including intubation and mechanical ventilation, might be necessary.</li> </ul> <p>9. <b>**Cardiogenic Shock Management**</b>:</p> <ul style="list-style-type: none"> <li>- Mechanical circulatory support devices, such as intra-aortic balloon pumps (IABP) or extracorporeal membrane oxygenation (ECMO), might be required for patients in cardiogenic shock.</li> </ul> <p>10. <b>**Avoidance of Potential Triggers**</b>:</p> <ul style="list-style-type: none"> <li>- Discontinue or avoid medications that could exacerbate myocarditis, heart failure, or induce arrhythmias.</li> </ul> <p>11. <b>**Consultations**</b>:</p> <ul style="list-style-type: none"> <li>- Engage a multidisciplinary team involving cardiologists, oncologists, and possibly heart failure or cardiac intensive care specialists to guide management.</li> </ul> <p>12. <b>**Patient and Family Education**</b>:</p> <ul style="list-style-type: none"> <li>- Keep the patient and their family informed about the condition, the potential risks, and the interventions being undertaken.</li> </ul> <p>13. <b>**Emotional and Psychological Support**</b>:</p> <ul style="list-style-type: none"> <li>- Offer support to patients and families, as the diagnosis and potential complications can be emotionally distressing.</li> </ul> <p>14. <b>**Planning for Future Therapies**</b>:</p> <ul style="list-style-type: none"> <li>- If myocarditis is confirmed and linked to the ICI, future use of that ICI or other ICIs should be carefully reconsidered, keeping in mind the potential risks.</li> </ul> | <p>8. <b>**Takotsubo Cardiomyopathy (Stress Cardiomyopathy)**</b>:</p> <ul style="list-style-type: none"> <li>- A transient heart condition that can mimic a heart attack, with symptoms including chest pain and shortness of breath, but without the coronary artery blockages seen in heart attacks.</li> </ul> <p>9. <b>**Conduction Abnormalities**</b>:</p> <ul style="list-style-type: none"> <li>- ICIs can cause abnormalities in the electrical conduction system of the heart, leading to conditions like heart block.</li> </ul> <p>10. <b>**Endocarditis**</b>:</p> <ul style="list-style-type: none"> <li>- While rare, there have been reports of ICIs being associated with endocarditis, an inflammation of the inner lining of the heart chambers and heart valves.</li> </ul> <p>It's essential for clinicians to maintain a high index of suspicion for cardiovascular toxicities in patients treated with ICIs. Regular monitoring, including blood pressure checks, ECGs, and blood tests, can help detect these complications early. Early detection and intervention can optimize outcomes and reduce morbidity and mortality associated with these conditions. Collaboration between oncologists and cardiologists can be beneficial in managing these patients.</p> |
|--|------------------------------------------------------------------------------------------------------------------------------------------------------------------------------------------------------------------------------------------------------------------------------------------------------------------------------------------------------------------------------------------------------------------------------------------------------------------------------------------------------------------------------------------------------------------------------------------------------------------------------------------------------------------------------------------------------------------------------------------------------------------------------------------------------------------------------------------------------------------------------------------------------------------------------------------------------------------------------------------------------------------------------------------------------------------------------------------------------------------------------------------------------------------------------------------------------------------------------------------------------------------------------------------------------------------------------------------------------------------------------------------------------------------------------------------------------------------------------------------------------------------------------------------------------------------------------------------------------------------------------------------------------------|---------------------------------------------------------------------------------------------------------------------------------------------------------------------------------------------------------------------------------------------------------------------------------------------------------------------------------------------------------------------------------------------------------------------------------------------------------------------------------------------------------------------------------------------------------------------------------------------------------------------------------------------------------------------------------------------------------------------------------------------------------------------------------------------------------------------------------------------------------------------------------------------------------------------------------------------------------------------------------------------------------------------------------------------------------------------------------------------------------------------------------|-------------------------------------------------------------------------------------------------------------------------------------------------------------------------------------------------------------------------------------------------------------------------------------------------------------------------------------------------------------------------------------------------------------------------------------------------------------------------------------------------------------------------------------------------------------------------------------------------------------------------------------------------------------------------------------------------------------------------------------------------------------------------------------------------------------------------------------------------------------------------------------------------------------------------------------------------------------------------------------------------------------------------------------------------------------------------------------------------------------------------------------------------------------------------------------------------------------------------------------------------------------------------------------------------------------------------------------------------------------------------------------------------------------------------------------------------------------------------------------------------------------------------------------------------------------------------------------------------------------------------------------------------------------------|-----------------------------------------------------------------------------------------------------------------------------------------------------------------------------------------------------------------------------------------------------------------------------------------------------------------------------------------------------------------------------------------------------------------------------------------------------------------------------------------------------------------------------------------------------------------------------------------------------------------------------------------------------------------------------------------------------------------------------------------------------------------------------------------------------------------------------------------------------------------------------------------------------------------------------------------------------------------------------------------------------------------------------------------------------------------------------------------------------------------------------------------------------------------------------------------------------------------------------------------------------------------------------------------------------------------------------------------------------------------------------------------------------------------------------------------------------------------------------------------------------------------------------------------------------------------------------------------------------------------------------------------------------------------------------------------------------------------------------------------------------------------------------------------------------------------------------------------------------------------------------------------------------------------------------------------------------------------------------------------------------------------------------------------------------------------------------------------------------------------------------------------------------------------------|-----------------------------------------------------------------------------------------------------------------------------------------------------------------------------------------------------------------------------------------------------------------------------------------------------------------------------------------------------------------------------------------------------------------------------------------------------------------------------------------------------------------------------------------------------------------------------------------------------------------------------------------------------------------------------------------------------------------------------------------------------------------------------------------------------------------------------------------------------------------------------------------------------------------------------------------------------------------------------------------------------------------------------------------------------------------------------------------------------------------------------------------------------------------------------------------------------------------------------------------------------------------------------------------------|

|  |  |  |  |                                                                                                                                                                                             |  |
|--|--|--|--|---------------------------------------------------------------------------------------------------------------------------------------------------------------------------------------------|--|
|  |  |  |  | Early recognition and aggressive supportive management of suspected ICI-associated myocarditis are crucial for optimizing outcomes and reducing the risk of life-threatening complications. |  |
|--|--|--|--|---------------------------------------------------------------------------------------------------------------------------------------------------------------------------------------------|--|

| Engine 2                                                                                                                                                                       |                                                                                                                                                                                                                                                                                                                                                                                                                                                                                                                                                                                                                                                                                                                                                                                                                                                                                                                                                                                                                                                                                                                                                                                                                                                                                                                                                                                                                                                                                                                                                                                |                                                                                                                                                                                                                                                                                                                                                                                                                                                                                                                                                                                                                                                                                                                                                                                                                                                                                                                                                                                                                                                                                                                                                                                                                                                                                                                                                                                                                                                                                                                                                                                                                                                                                                                |                                                                                                                                                                                                                                                                                                                                                                                                                                                                                                                                                                                                                                                                                                                                                                                                                                                                                                                                                                                                                                                                                                                                                                                                                                                                                                                                                                                                                                                                                                                                                                                                                                                                                                                                                                                                                                   |                                                                                                                                                                                                                                                                                                                                                                                                                                                                                                                                                                                                                                                                                                                                                                                                                                                                                                                                                                                                                                                                                                                                                                                                                                                                                                                                                                                                                                                                                                                                                                                                                                                                                                                                                  |                                                                                                                                                                                                                                                                                                                                                                                                                                                                                                                                                                                                                                                                                                                                                                                                                                                                                                                                                                                                                                                                                                                                                                                                                                                                                                                                                                                                                                                                                                                                                                                                                                                                                                                                                                                                                                                                                                                                                                                                                                                                       |                                                               |         |                                |                                         |                                                                                                                                                                                |
|--------------------------------------------------------------------------------------------------------------------------------------------------------------------------------|--------------------------------------------------------------------------------------------------------------------------------------------------------------------------------------------------------------------------------------------------------------------------------------------------------------------------------------------------------------------------------------------------------------------------------------------------------------------------------------------------------------------------------------------------------------------------------------------------------------------------------------------------------------------------------------------------------------------------------------------------------------------------------------------------------------------------------------------------------------------------------------------------------------------------------------------------------------------------------------------------------------------------------------------------------------------------------------------------------------------------------------------------------------------------------------------------------------------------------------------------------------------------------------------------------------------------------------------------------------------------------------------------------------------------------------------------------------------------------------------------------------------------------------------------------------------------------|----------------------------------------------------------------------------------------------------------------------------------------------------------------------------------------------------------------------------------------------------------------------------------------------------------------------------------------------------------------------------------------------------------------------------------------------------------------------------------------------------------------------------------------------------------------------------------------------------------------------------------------------------------------------------------------------------------------------------------------------------------------------------------------------------------------------------------------------------------------------------------------------------------------------------------------------------------------------------------------------------------------------------------------------------------------------------------------------------------------------------------------------------------------------------------------------------------------------------------------------------------------------------------------------------------------------------------------------------------------------------------------------------------------------------------------------------------------------------------------------------------------------------------------------------------------------------------------------------------------------------------------------------------------------------------------------------------------|-----------------------------------------------------------------------------------------------------------------------------------------------------------------------------------------------------------------------------------------------------------------------------------------------------------------------------------------------------------------------------------------------------------------------------------------------------------------------------------------------------------------------------------------------------------------------------------------------------------------------------------------------------------------------------------------------------------------------------------------------------------------------------------------------------------------------------------------------------------------------------------------------------------------------------------------------------------------------------------------------------------------------------------------------------------------------------------------------------------------------------------------------------------------------------------------------------------------------------------------------------------------------------------------------------------------------------------------------------------------------------------------------------------------------------------------------------------------------------------------------------------------------------------------------------------------------------------------------------------------------------------------------------------------------------------------------------------------------------------------------------------------------------------------------------------------------------------|--------------------------------------------------------------------------------------------------------------------------------------------------------------------------------------------------------------------------------------------------------------------------------------------------------------------------------------------------------------------------------------------------------------------------------------------------------------------------------------------------------------------------------------------------------------------------------------------------------------------------------------------------------------------------------------------------------------------------------------------------------------------------------------------------------------------------------------------------------------------------------------------------------------------------------------------------------------------------------------------------------------------------------------------------------------------------------------------------------------------------------------------------------------------------------------------------------------------------------------------------------------------------------------------------------------------------------------------------------------------------------------------------------------------------------------------------------------------------------------------------------------------------------------------------------------------------------------------------------------------------------------------------------------------------------------------------------------------------------------------------|-----------------------------------------------------------------------------------------------------------------------------------------------------------------------------------------------------------------------------------------------------------------------------------------------------------------------------------------------------------------------------------------------------------------------------------------------------------------------------------------------------------------------------------------------------------------------------------------------------------------------------------------------------------------------------------------------------------------------------------------------------------------------------------------------------------------------------------------------------------------------------------------------------------------------------------------------------------------------------------------------------------------------------------------------------------------------------------------------------------------------------------------------------------------------------------------------------------------------------------------------------------------------------------------------------------------------------------------------------------------------------------------------------------------------------------------------------------------------------------------------------------------------------------------------------------------------------------------------------------------------------------------------------------------------------------------------------------------------------------------------------------------------------------------------------------------------------------------------------------------------------------------------------------------------------------------------------------------------------------------------------------------------------------------------------------------------|---------------------------------------------------------------|---------|--------------------------------|-----------------------------------------|--------------------------------------------------------------------------------------------------------------------------------------------------------------------------------|
|                                                                                                                                                                                | ICI - general                                                                                                                                                                                                                                                                                                                                                                                                                                                                                                                                                                                                                                                                                                                                                                                                                                                                                                                                                                                                                                                                                                                                                                                                                                                                                                                                                                                                                                                                                                                                                                  | ICI - general                                                                                                                                                                                                                                                                                                                                                                                                                                                                                                                                                                                                                                                                                                                                                                                                                                                                                                                                                                                                                                                                                                                                                                                                                                                                                                                                                                                                                                                                                                                                                                                                                                                                                                  | ICI - general                                                                                                                                                                                                                                                                                                                                                                                                                                                                                                                                                                                                                                                                                                                                                                                                                                                                                                                                                                                                                                                                                                                                                                                                                                                                                                                                                                                                                                                                                                                                                                                                                                                                                                                                                                                                                     | ICI - general                                                                                                                                                                                                                                                                                                                                                                                                                                                                                                                                                                                                                                                                                                                                                                                                                                                                                                                                                                                                                                                                                                                                                                                                                                                                                                                                                                                                                                                                                                                                                                                                                                                                                                                                    | ICI - general                                                                                                                                                                                                                                                                                                                                                                                                                                                                                                                                                                                                                                                                                                                                                                                                                                                                                                                                                                                                                                                                                                                                                                                                                                                                                                                                                                                                                                                                                                                                                                                                                                                                                                                                                                                                                                                                                                                                                                                                                                                         |                                                               |         |                                |                                         |                                                                                                                                                                                |
| Question                                                                                                                                                                       | Which patient populations should not receive immune checkpoint inhibitors?                                                                                                                                                                                                                                                                                                                                                                                                                                                                                                                                                                                                                                                                                                                                                                                                                                                                                                                                                                                                                                                                                                                                                                                                                                                                                                                                                                                                                                                                                                     | What are the main treatments for grade 3 or higher immune checkpoint inhibitor toxicities? Please include dose and duration of any medications                                                                                                                                                                                                                                                                                                                                                                                                                                                                                                                                                                                                                                                                                                                                                                                                                                                                                                                                                                                                                                                                                                                                                                                                                                                                                                                                                                                                                                                                                                                                                                 | What are the major complications of high dose steroids?                                                                                                                                                                                                                                                                                                                                                                                                                                                                                                                                                                                                                                                                                                                                                                                                                                                                                                                                                                                                                                                                                                                                                                                                                                                                                                                                                                                                                                                                                                                                                                                                                                                                                                                                                                           | What surveillance labs should be obtained in all patients treated with immune checkpoint inhibitors?                                                                                                                                                                                                                                                                                                                                                                                                                                                                                                                                                                                                                                                                                                                                                                                                                                                                                                                                                                                                                                                                                                                                                                                                                                                                                                                                                                                                                                                                                                                                                                                                                                             | What are the risks of using combination immune checkpoint inhibition compared with anti-PD-1 monotherapy?                                                                                                                                                                                                                                                                                                                                                                                                                                                                                                                                                                                                                                                                                                                                                                                                                                                                                                                                                                                                                                                                                                                                                                                                                                                                                                                                                                                                                                                                                                                                                                                                                                                                                                                                                                                                                                                                                                                                                             |                                                               |         |                                |                                         |                                                                                                                                                                                |
| Answer Engine 2 (Bard)                                                                                                                                                         | <p>Immune checkpoint inhibitors (ICIs) are a type of cancer immunotherapy that work by unleashing the body's own immune system to attack cancer cells. ICIs have revolutionized cancer treatment, but they are not suitable for all patients.</p> <p><b>**Patient populations that should not receive ICIs include:**</b></p> <p><b>***Pregnant or breastfeeding women.**</b> The safety and efficacy of ICIs in pregnant women have not been fully established. ICIs may cross the placenta and potentially harm the developing fetus. They may also be excreted in breast milk and could potentially harm the nursing infant.</p> <p><b>***Patients with active autoimmune diseases.**</b> ICIs can trigger or worsen autoimmune diseases. Patients with active autoimmune diseases are at increased risk for serious immune-related adverse events (irAEs) from ICIs.</p> <p><b>***Patients with uncontrolled infections.**</b> ICIs can suppress the immune system, making patients more susceptible to infections. Patients with uncontrolled infections should not receive ICIs until the infections are under control.</p> <p><b>***Patients with organ dysfunction.**</b> ICIs can cause damage to healthy organs, including the liver, kidneys, lungs, and heart. Patients with severe organ dysfunction should not receive ICIs unless the potential benefits outweigh the risks.</p> <p>Other patient populations that may not be suitable for ICIs include:</p> <p><b>* Patients with a history of severe allergic reactions to ICIs or other medications.</b></p> | <p>The main treatments for grade 3 or higher immune checkpoint inhibitor (ICI) toxicities are corticosteroids and other immunosuppressive drugs.</p> <p><b>**Corticosteroids**</b> are the first-line treatment for most grade 3 or higher ICI toxicities. They are typically given at a high dose, such as prednisone 1-2 mg/kg/day or methylprednisolone 1-2 mg/kg/day. The duration of treatment depends on the type and severity of the toxicity, but it is typically 4-6 weeks.</p> <p><b>**Other immunosuppressive drugs**</b> may be used if corticosteroids are not effective or if the toxicity is severe. Some examples of other immunosuppressive drugs that may be used for ICI toxicities include:</p> <ul style="list-style-type: none"> <li>* Infliximab (Remicade)</li> <li>* Mycophenolate mofetil (CellCept)</li> <li>* Tacrolimus (Prograf)</li> <li>* Cyclosporine (Sandimmune)</li> <li>* Anti-thymocyte globulin (ATG)</li> </ul> <p>The dose and duration of treatment with other immunosuppressive drugs will vary depending on the type of drug and the severity of the toxicity.</p> <p><b>**Additional treatments**</b> may also be needed depending on the type of ICI toxicity. For example, patients with ICI-related colitis may need to be hospitalized for intravenous fluids and electrolytes. Patients with ICI-related pneumonitis may need to be treated with antibiotics or oxygen therapy.</p> <p>It is important to note that all of these treatments can have side effects, so it is important to weigh the risks and benefits of treatment carefully.</p> <p>Here is a table that summarizes the main treatments for grade 3 or higher ICI toxicities, including</p> | <p>High-dose steroids are used to treat a variety of conditions, including autoimmune diseases, cancer, and severe allergic reactions. While they can be very effective, high-dose steroids can also cause a number of serious complications.</p> <p>The major complications of high-dose steroids include:</p> <p><b>***Adrenal suppression:**</b> Steroids suppress the production of cortisol by the adrenal glands. This can lead to a number of problems, including fatigue, weakness, low blood sugar, and difficulty responding to stress.</p> <p><b>***Osteoporosis:**</b> Steroids weaken the bones, making them more likely to break.</p> <p><b>***Cushing's syndrome:**</b> This is a condition caused by high levels of cortisol in the body. Symptoms of Cushing's syndrome include weight gain around the face and neck, a round face (moon face), a hump between the shoulders (buffalo hump), thinning skin, and stretch marks.</p> <p><b>***Muscle weakness:**</b> Steroids can weaken the muscles, making it difficult to perform everyday activities.</p> <p><b>***Increased risk of infection:**</b> Steroids suppress the immune system, making people more susceptible to infections.</p> <p><b>***Hyperglycemia:**</b> Steroids can increase blood sugar levels, which can lead to diabetes or worsen existing diabetes.</p> <p><b>***Hypertension:**</b> Steroids can increase blood pressure.</p> <p><b>***Mood changes:**</b> Steroids can cause mood changes, such as anxiety, depression, and irritability.</p> <p><b>***Glaucoma and cataracts:**</b> Steroids can increase the risk of developing glaucoma and cataracts.</p> <p>The risk of complications from high-dose steroids depends on the dose of steroids, the length of treatment, and the individual's underlying health conditions.</p> | <p>All patients treated with immune checkpoint inhibitors (ICIs) should have the following surveillance labs obtained:</p> <p><b>**Complete blood count (CBC)**:</b> This test can identify anemia, leukopenia, and thrombocytopenia, which can all be side effects of ICIs.</p> <p><b>**Comprehensive metabolic panel (CMP)**:</b> This test can identify liver toxicity, kidney toxicity, and electrolyte abnormalities, which can also be side effects of ICIs.</p> <p><b>**Thyroid function tests (TFTs)**:</b> ICIs can cause thyroid dysfunction, so it is important to monitor thyroid function in patients on ICIs.</p> <p><b>**Urinalysis**:</b> This test can identify kidney toxicity and other problems, such as proteinuria and hematuria.</p> <p>The frequency of surveillance labs will vary depending on the type of ICI and the patient's individual risk factors. For example, patients on anti-PD-1 therapy may need to have labs more frequently than patients on anti-CTLA-4 therapy.</p> <p>In addition to the routine surveillance labs listed above, other labs may be ordered if the patient develops symptoms of an immune-related adverse event (irAE). For example, if a patient develops diarrhea, the doctor may order a stool test to rule out infection. If a patient develops skin rash, the doctor may order a skin biopsy to rule out other causes of the rash.</p> <p>It is important to note that surveillance labs are not perfect. They may not detect all irAEs, and some irAEs may develop even if the surveillance labs are normal. However, surveillance labs can help to identify irAEs early so that they can be treated promptly.</p> <p>If you have any questions about surveillance labs for</p> | <p>Combination immune checkpoint inhibition (ICI) therapy has been shown to be more effective than anti-PD-1 monotherapy in some types of cancer, but it also comes with increased risks.</p> <p>The main risks of combination ICI therapy are:</p> <p><b>***Increased risk of immune-related adverse events (irAEs)**:</b> irAEs are side effects that occur when the immune system overreacts and attacks healthy tissues. irAEs can be mild or severe, and they can affect any part of the body. The most common irAEs from combination ICI therapy include colitis, hepatitis, pneumonitis, and skin toxicity.</p> <p><b>***Increased risk of death**:</b> Combination ICI therapy has been associated with a slightly increased risk of death compared to anti-PD-1 monotherapy. This is likely due to the increased risk of irAEs.</p> <p>Other risks of combination ICI therapy include:</p> <p><b>***Fatigue**</b></p> <p><b>***Nausea and vomiting**</b></p> <p><b>***Hair loss**</b></p> <p><b>***Decreased appetite**</b></p> <p><b>***Muscle and joint pain**</b></p> <p><b>***Skin rash**</b></p> <p><b>***Itching**</b></p> <p><b>***Constipation**</b></p> <p><b>***Diarrhea**</b></p> <p>The risks of combination ICI therapy should be carefully weighed against the potential benefits before starting treatment. It is important to talk to your doctor about the risks and benefits of combination ICI therapy to see if it is right for you.</p> <p>Here is a table that summarizes the risks of combination ICI therapy compared with anti-PD-1 monotherapy:</p> <table border="1"> <tr> <td>  Risk factor   Combination ICI therapy   Anti-PD-1 monotherapy  </td> </tr> <tr> <td>  --- --- </td> </tr> <tr> <td>  Risk of irAEs   Higher   Lower  </td> </tr> <tr> <td>  Risk of death   Slightly higher   Lower  </td> </tr> <tr> <td>  Other risks   Fatigue, nausea and vomiting, hair loss, decreased appetite, muscle and joint pain, skin rash, itching, constipation, diarrhea   Same as combination ICI therapy  </td> </tr> </table> | Risk factor   Combination ICI therapy   Anti-PD-1 monotherapy | --- --- | Risk of irAEs   Higher   Lower | Risk of death   Slightly higher   Lower | Other risks   Fatigue, nausea and vomiting, hair loss, decreased appetite, muscle and joint pain, skin rash, itching, constipation, diarrhea   Same as combination ICI therapy |
| Risk factor   Combination ICI therapy   Anti-PD-1 monotherapy                                                                                                                  |                                                                                                                                                                                                                                                                                                                                                                                                                                                                                                                                                                                                                                                                                                                                                                                                                                                                                                                                                                                                                                                                                                                                                                                                                                                                                                                                                                                                                                                                                                                                                                                |                                                                                                                                                                                                                                                                                                                                                                                                                                                                                                                                                                                                                                                                                                                                                                                                                                                                                                                                                                                                                                                                                                                                                                                                                                                                                                                                                                                                                                                                                                                                                                                                                                                                                                                |                                                                                                                                                                                                                                                                                                                                                                                                                                                                                                                                                                                                                                                                                                                                                                                                                                                                                                                                                                                                                                                                                                                                                                                                                                                                                                                                                                                                                                                                                                                                                                                                                                                                                                                                                                                                                                   |                                                                                                                                                                                                                                                                                                                                                                                                                                                                                                                                                                                                                                                                                                                                                                                                                                                                                                                                                                                                                                                                                                                                                                                                                                                                                                                                                                                                                                                                                                                                                                                                                                                                                                                                                  |                                                                                                                                                                                                                                                                                                                                                                                                                                                                                                                                                                                                                                                                                                                                                                                                                                                                                                                                                                                                                                                                                                                                                                                                                                                                                                                                                                                                                                                                                                                                                                                                                                                                                                                                                                                                                                                                                                                                                                                                                                                                       |                                                               |         |                                |                                         |                                                                                                                                                                                |
| --- ---                                                                                                                                                                        |                                                                                                                                                                                                                                                                                                                                                                                                                                                                                                                                                                                                                                                                                                                                                                                                                                                                                                                                                                                                                                                                                                                                                                                                                                                                                                                                                                                                                                                                                                                                                                                |                                                                                                                                                                                                                                                                                                                                                                                                                                                                                                                                                                                                                                                                                                                                                                                                                                                                                                                                                                                                                                                                                                                                                                                                                                                                                                                                                                                                                                                                                                                                                                                                                                                                                                                |                                                                                                                                                                                                                                                                                                                                                                                                                                                                                                                                                                                                                                                                                                                                                                                                                                                                                                                                                                                                                                                                                                                                                                                                                                                                                                                                                                                                                                                                                                                                                                                                                                                                                                                                                                                                                                   |                                                                                                                                                                                                                                                                                                                                                                                                                                                                                                                                                                                                                                                                                                                                                                                                                                                                                                                                                                                                                                                                                                                                                                                                                                                                                                                                                                                                                                                                                                                                                                                                                                                                                                                                                  |                                                                                                                                                                                                                                                                                                                                                                                                                                                                                                                                                                                                                                                                                                                                                                                                                                                                                                                                                                                                                                                                                                                                                                                                                                                                                                                                                                                                                                                                                                                                                                                                                                                                                                                                                                                                                                                                                                                                                                                                                                                                       |                                                               |         |                                |                                         |                                                                                                                                                                                |
| Risk of irAEs   Higher   Lower                                                                                                                                                 |                                                                                                                                                                                                                                                                                                                                                                                                                                                                                                                                                                                                                                                                                                                                                                                                                                                                                                                                                                                                                                                                                                                                                                                                                                                                                                                                                                                                                                                                                                                                                                                |                                                                                                                                                                                                                                                                                                                                                                                                                                                                                                                                                                                                                                                                                                                                                                                                                                                                                                                                                                                                                                                                                                                                                                                                                                                                                                                                                                                                                                                                                                                                                                                                                                                                                                                |                                                                                                                                                                                                                                                                                                                                                                                                                                                                                                                                                                                                                                                                                                                                                                                                                                                                                                                                                                                                                                                                                                                                                                                                                                                                                                                                                                                                                                                                                                                                                                                                                                                                                                                                                                                                                                   |                                                                                                                                                                                                                                                                                                                                                                                                                                                                                                                                                                                                                                                                                                                                                                                                                                                                                                                                                                                                                                                                                                                                                                                                                                                                                                                                                                                                                                                                                                                                                                                                                                                                                                                                                  |                                                                                                                                                                                                                                                                                                                                                                                                                                                                                                                                                                                                                                                                                                                                                                                                                                                                                                                                                                                                                                                                                                                                                                                                                                                                                                                                                                                                                                                                                                                                                                                                                                                                                                                                                                                                                                                                                                                                                                                                                                                                       |                                                               |         |                                |                                         |                                                                                                                                                                                |
| Risk of death   Slightly higher   Lower                                                                                                                                        |                                                                                                                                                                                                                                                                                                                                                                                                                                                                                                                                                                                                                                                                                                                                                                                                                                                                                                                                                                                                                                                                                                                                                                                                                                                                                                                                                                                                                                                                                                                                                                                |                                                                                                                                                                                                                                                                                                                                                                                                                                                                                                                                                                                                                                                                                                                                                                                                                                                                                                                                                                                                                                                                                                                                                                                                                                                                                                                                                                                                                                                                                                                                                                                                                                                                                                                |                                                                                                                                                                                                                                                                                                                                                                                                                                                                                                                                                                                                                                                                                                                                                                                                                                                                                                                                                                                                                                                                                                                                                                                                                                                                                                                                                                                                                                                                                                                                                                                                                                                                                                                                                                                                                                   |                                                                                                                                                                                                                                                                                                                                                                                                                                                                                                                                                                                                                                                                                                                                                                                                                                                                                                                                                                                                                                                                                                                                                                                                                                                                                                                                                                                                                                                                                                                                                                                                                                                                                                                                                  |                                                                                                                                                                                                                                                                                                                                                                                                                                                                                                                                                                                                                                                                                                                                                                                                                                                                                                                                                                                                                                                                                                                                                                                                                                                                                                                                                                                                                                                                                                                                                                                                                                                                                                                                                                                                                                                                                                                                                                                                                                                                       |                                                               |         |                                |                                         |                                                                                                                                                                                |
| Other risks   Fatigue, nausea and vomiting, hair loss, decreased appetite, muscle and joint pain, skin rash, itching, constipation, diarrhea   Same as combination ICI therapy |                                                                                                                                                                                                                                                                                                                                                                                                                                                                                                                                                                                                                                                                                                                                                                                                                                                                                                                                                                                                                                                                                                                                                                                                                                                                                                                                                                                                                                                                                                                                                                                |                                                                                                                                                                                                                                                                                                                                                                                                                                                                                                                                                                                                                                                                                                                                                                                                                                                                                                                                                                                                                                                                                                                                                                                                                                                                                                                                                                                                                                                                                                                                                                                                                                                                                                                |                                                                                                                                                                                                                                                                                                                                                                                                                                                                                                                                                                                                                                                                                                                                                                                                                                                                                                                                                                                                                                                                                                                                                                                                                                                                                                                                                                                                                                                                                                                                                                                                                                                                                                                                                                                                                                   |                                                                                                                                                                                                                                                                                                                                                                                                                                                                                                                                                                                                                                                                                                                                                                                                                                                                                                                                                                                                                                                                                                                                                                                                                                                                                                                                                                                                                                                                                                                                                                                                                                                                                                                                                  |                                                                                                                                                                                                                                                                                                                                                                                                                                                                                                                                                                                                                                                                                                                                                                                                                                                                                                                                                                                                                                                                                                                                                                                                                                                                                                                                                                                                                                                                                                                                                                                                                                                                                                                                                                                                                                                                                                                                                                                                                                                                       |                                                               |         |                                |                                         |                                                                                                                                                                                |

|  |                                                                                                                                                                                                                                                                                                                                                                                                                                                                                                                                                                                                                                                                                                                             |                                                                                                                                                                                                                                                                                                                                                                                                                                                                                                                                                                                                                                                                                                                                                                                                                                                                                                                                                                                                            |                                                                                                                                                                                                                                                                                                                                                     |                                              |                                                                                                                                                                                                                                                             |
|--|-----------------------------------------------------------------------------------------------------------------------------------------------------------------------------------------------------------------------------------------------------------------------------------------------------------------------------------------------------------------------------------------------------------------------------------------------------------------------------------------------------------------------------------------------------------------------------------------------------------------------------------------------------------------------------------------------------------------------------|------------------------------------------------------------------------------------------------------------------------------------------------------------------------------------------------------------------------------------------------------------------------------------------------------------------------------------------------------------------------------------------------------------------------------------------------------------------------------------------------------------------------------------------------------------------------------------------------------------------------------------------------------------------------------------------------------------------------------------------------------------------------------------------------------------------------------------------------------------------------------------------------------------------------------------------------------------------------------------------------------------|-----------------------------------------------------------------------------------------------------------------------------------------------------------------------------------------------------------------------------------------------------------------------------------------------------------------------------------------------------|----------------------------------------------|-------------------------------------------------------------------------------------------------------------------------------------------------------------------------------------------------------------------------------------------------------------|
|  | <p>* Patients who are taking other medications that can suppress the immune system, such as corticosteroids or other immunosuppressants.</p> <p>* Patients with poor performance status (i.e., patients who are very weak or have a lot of other medical problems).</p> <p>It is important to note that the decision of whether or not to give ICIs to a patient should be made on a case-by-case basis, considering the patient's individual risks and benefits. Oncologists will carefully weigh the potential benefits of ICIs against the potential risks before making a recommendation.</p> <p>If you are considering ICIs for cancer treatment, be sure to discuss your risks and benefits with your oncologist.</p> | <p>dose and duration:</p> <p>  Medication   Dose   Duration  </p> <p>  Prednisone   1-2 mg/kg/day   4-6 weeks  </p> <p>  Methylprednisolone   1-2 mg/kg/day   4-6 weeks  </p> <p>  Infliximab   5 mg/kg   Every 6-8 weeks  </p> <p>  Mycophenolate mofetil   1-3 grams/day   4-6 weeks or longer  </p> <p>  Tacrolimus   0.03-0.05 mg/kg/day   4-6 weeks or longer  </p> <p>  Cyclosporine   3-5 mg/kg/day   4-6 weeks or longer  </p> <p>  Anti-thymocyte globulin   1-2 mg/kg/day   3-5 days  </p> <p><b>**Other treatments**</b> may also be needed depending on the type of ICI toxicity. For example, patients with ICI-related colitis may need to be hospitalized for intravenous fluids and electrolytes. Patients with ICI-related pneumonitis may need to be treated with antibiotics or oxygen therapy.</p> <p>Please note that this is just a general overview of the main treatments for grade 3 or higher ICI toxicities. For more specific information, please talk to your oncologist.</p> | <p>It is important to talk to your doctor about the risks and benefits of high-dose steroids before starting treatment. Your doctor will monitor you closely for complications and will adjust the dose of steroids as needed.</p> <p>If you are experiencing any of the complications listed above, be sure to talk to your doctor right away.</p> | <p>ICIs, be sure to talk to your doctor.</p> | <p>It is important to note that these are just general risks. The specific risks of combination ICI therapy will vary depending on the type of cancer being treated, the specific ICI drugs being used, and the patient's individual health conditions.</p> |
|--|-----------------------------------------------------------------------------------------------------------------------------------------------------------------------------------------------------------------------------------------------------------------------------------------------------------------------------------------------------------------------------------------------------------------------------------------------------------------------------------------------------------------------------------------------------------------------------------------------------------------------------------------------------------------------------------------------------------------------------|------------------------------------------------------------------------------------------------------------------------------------------------------------------------------------------------------------------------------------------------------------------------------------------------------------------------------------------------------------------------------------------------------------------------------------------------------------------------------------------------------------------------------------------------------------------------------------------------------------------------------------------------------------------------------------------------------------------------------------------------------------------------------------------------------------------------------------------------------------------------------------------------------------------------------------------------------------------------------------------------------------|-----------------------------------------------------------------------------------------------------------------------------------------------------------------------------------------------------------------------------------------------------------------------------------------------------------------------------------------------------|----------------------------------------------|-------------------------------------------------------------------------------------------------------------------------------------------------------------------------------------------------------------------------------------------------------------|



|                        | Colitis                                                                                                                                                                                                                                                                                                                                                                                                                                                                                                                                                                                                                                                                                                                                                                                                                                                                                                                                                                                                                                                                                                                                                                                                                                                                                                                                                                                                                                                                                                                                                                                                                                                                                                            | Colitis                                                                                                                                                                                                                                                                                                                                                                                                                                                                                                                                                                                                                                                                                                                                                                                                                                                                                                                                                                                                                                                                                                                                                                                                                                                                                                                                                                                                                                                                                                                                                                                                                                                                                                                                                                                                          | Colitis                                                                                                                                                                                                                                                                                                                                                                                                                                                                                                                                                                                                                                                                                                                                                                                                                                                                                                                                                                                                                                                                                                                                                                                                                                                                                                                                                                                                                                                                                                                                                                                                                                                                                                                                                                                          | Colitis                                                                                                                                                                                                                                                                                                                                                                                                                                                                                                                                                                                                                                                                                                                                                                                                                                                                                                                                                                                                                                                                                                                                                                                                                                                                                                                                                                                                  | Colitis                                                                                                                                                                                                                                                                                                                                                                                                                                                                                                                                                                                                                                                                                                                                                                                                                                                                                                                                                                                                                                                                                                                                                                                                                                                                                                                                                                                                                                                                                                                                                                                                                                                                                                                                                                                                                                                                                                                                                                                                                          |
|------------------------|--------------------------------------------------------------------------------------------------------------------------------------------------------------------------------------------------------------------------------------------------------------------------------------------------------------------------------------------------------------------------------------------------------------------------------------------------------------------------------------------------------------------------------------------------------------------------------------------------------------------------------------------------------------------------------------------------------------------------------------------------------------------------------------------------------------------------------------------------------------------------------------------------------------------------------------------------------------------------------------------------------------------------------------------------------------------------------------------------------------------------------------------------------------------------------------------------------------------------------------------------------------------------------------------------------------------------------------------------------------------------------------------------------------------------------------------------------------------------------------------------------------------------------------------------------------------------------------------------------------------------------------------------------------------------------------------------------------------|------------------------------------------------------------------------------------------------------------------------------------------------------------------------------------------------------------------------------------------------------------------------------------------------------------------------------------------------------------------------------------------------------------------------------------------------------------------------------------------------------------------------------------------------------------------------------------------------------------------------------------------------------------------------------------------------------------------------------------------------------------------------------------------------------------------------------------------------------------------------------------------------------------------------------------------------------------------------------------------------------------------------------------------------------------------------------------------------------------------------------------------------------------------------------------------------------------------------------------------------------------------------------------------------------------------------------------------------------------------------------------------------------------------------------------------------------------------------------------------------------------------------------------------------------------------------------------------------------------------------------------------------------------------------------------------------------------------------------------------------------------------------------------------------------------------|--------------------------------------------------------------------------------------------------------------------------------------------------------------------------------------------------------------------------------------------------------------------------------------------------------------------------------------------------------------------------------------------------------------------------------------------------------------------------------------------------------------------------------------------------------------------------------------------------------------------------------------------------------------------------------------------------------------------------------------------------------------------------------------------------------------------------------------------------------------------------------------------------------------------------------------------------------------------------------------------------------------------------------------------------------------------------------------------------------------------------------------------------------------------------------------------------------------------------------------------------------------------------------------------------------------------------------------------------------------------------------------------------------------------------------------------------------------------------------------------------------------------------------------------------------------------------------------------------------------------------------------------------------------------------------------------------------------------------------------------------------------------------------------------------|----------------------------------------------------------------------------------------------------------------------------------------------------------------------------------------------------------------------------------------------------------------------------------------------------------------------------------------------------------------------------------------------------------------------------------------------------------------------------------------------------------------------------------------------------------------------------------------------------------------------------------------------------------------------------------------------------------------------------------------------------------------------------------------------------------------------------------------------------------------------------------------------------------------------------------------------------------------------------------------------------------------------------------------------------------------------------------------------------------------------------------------------------------------------------------------------------------------------------------------------------------------------------------------------------------------------------------------------------------------------------------------------------------|----------------------------------------------------------------------------------------------------------------------------------------------------------------------------------------------------------------------------------------------------------------------------------------------------------------------------------------------------------------------------------------------------------------------------------------------------------------------------------------------------------------------------------------------------------------------------------------------------------------------------------------------------------------------------------------------------------------------------------------------------------------------------------------------------------------------------------------------------------------------------------------------------------------------------------------------------------------------------------------------------------------------------------------------------------------------------------------------------------------------------------------------------------------------------------------------------------------------------------------------------------------------------------------------------------------------------------------------------------------------------------------------------------------------------------------------------------------------------------------------------------------------------------------------------------------------------------------------------------------------------------------------------------------------------------------------------------------------------------------------------------------------------------------------------------------------------------------------------------------------------------------------------------------------------------------------------------------------------------------------------------------------------------|
| Question               | What is the primary diagnostic workup for suspected immune checkpoint inhibitor colitis?                                                                                                                                                                                                                                                                                                                                                                                                                                                                                                                                                                                                                                                                                                                                                                                                                                                                                                                                                                                                                                                                                                                                                                                                                                                                                                                                                                                                                                                                                                                                                                                                                           | What are other conditions in the differential diagnosis when considering immune checkpoint inhibitor associated colitis?                                                                                                                                                                                                                                                                                                                                                                                                                                                                                                                                                                                                                                                                                                                                                                                                                                                                                                                                                                                                                                                                                                                                                                                                                                                                                                                                                                                                                                                                                                                                                                                                                                                                                         | Are there any situations where immune checkpoint inhibitors can be continued even if colitis is suspected?                                                                                                                                                                                                                                                                                                                                                                                                                                                                                                                                                                                                                                                                                                                                                                                                                                                                                                                                                                                                                                                                                                                                                                                                                                                                                                                                                                                                                                                                                                                                                                                                                                                                                       | What are the diagnostic criteria for grade 3 colitis or diarrhea from immune checkpoint inhibitors?                                                                                                                                                                                                                                                                                                                                                                                                                                                                                                                                                                                                                                                                                                                                                                                                                                                                                                                                                                                                                                                                                                                                                                                                                                                                                                      | What are the primary treatments for immune checkpoint inhibitor-associated colitis that does not respond to high-dose steroids?                                                                                                                                                                                                                                                                                                                                                                                                                                                                                                                                                                                                                                                                                                                                                                                                                                                                                                                                                                                                                                                                                                                                                                                                                                                                                                                                                                                                                                                                                                                                                                                                                                                                                                                                                                                                                                                                                                  |
| Answer Engine 2 (Bard) | <p>The primary diagnostic workup for suspected immune checkpoint inhibitor (ICI) colitis includes:</p> <p>***History and physical examination:** The doctor will ask about the patient's symptoms, medical history, and medications. They will also perform a physical examination to look for signs of colitis, such as abdominal tenderness, distention, and fever.</p> <p>***Laboratory tests:** The doctor may order the following laboratory tests:</p> <ul style="list-style-type: none"> <li>* Complete blood count (CBC) to check for anemia, leukopenia, and thrombocytopenia</li> <li>* Comprehensive metabolic panel (CMP) to check for liver toxicity, kidney toxicity, and electrolyte abnormalities</li> <li>* Inflammatory markers, such as C-reactive protein (CRP) and erythrocyte sedimentation rate (ESR)</li> <li>* Stool culture and ova and parasite (O&amp;P) exam to rule out infection</li> </ul> <p>***Endoscopy:** Endoscopy is the gold standard for diagnosing ICI colitis. It involves inserting a thin, flexible tube with a camera on the end into the rectum and colon. The doctor can then look for signs of inflammation, such as redness, swelling, and ulcers. Biopsies of the colon may be taken to confirm the diagnosis.</p> <p>Other tests that may be ordered depending on the patient's presentation include:</p> <p>***Imaging tests:** Such as CT or MRI scans, may be ordered to look for complications of ICI colitis, such as perforation or abscess.</p> <p>***Infectious disease testing:** Such as CMV PCR or cultures, may be ordered to rule out infectious causes of colitis in patients with immunosuppression.</p> <p>***Autoimmune testing:** Such as</p> | <p>The differential diagnosis for immune checkpoint inhibitor (ICI)-associated colitis includes a wide range of conditions that can cause inflammation of the colon. These conditions include:</p> <p>***Infectious colitis:** This is the most common cause of colitis, and it can be caused by a variety of bacteria, viruses, and parasites.</p> <p>***Inflammatory bowel disease (IBD):** This is a chronic autoimmune disease that can cause inflammation of the digestive tract, including the colon.</p> <p>***Celiac disease:** This is an autoimmune disorder that is triggered by gluten, a protein found in wheat, barley, and rye.</p> <p>***Microscopic colitis:** This is a condition that causes inflammation of the colon, but it is not visible on colonoscopy.</p> <p>***Ischemic colitis:** This is a condition that occurs when there is a decrease in blood flow to the colon.</p> <p>***Radiation colitis:** This is a condition that occurs as a side effect of radiation therapy.</p> <p>***Drug-induced colitis:** This is a condition that is caused by certain medications, such as antibiotics and nonsteroidal anti-inflammatory drugs (NSAIDs).</p> <p>Other conditions that may be considered in the differential diagnosis of ICI-associated colitis include:</p> <p>***Graft-versus-host disease (GVHD):** This is a condition that can develop after a stem cell transplant, when the donor's immune cells attack the recipient's body.</p> <p>***Diverticulitis:** This is a condition that occurs when inflammation develops in small pouches (diverticula) that form in the lining of the colon.</p> <p>***Cancer:** Cancer of the colon or rectum can also cause colitis.</p> <p>It is important to note that some of these conditions can coexist with ICI-associated</p> | <p>Yes, there are some situations where immune checkpoint inhibitors (ICIs) can be continued even if colitis is suspected. These situations include:</p> <p>***Mild colitis:** If the colitis is mild, with symptoms such as occasional diarrhea and abdominal cramps, the doctor may recommend continuing ICIs with close monitoring.</p> <p>***Colitis that is responding to treatment:** If the colitis is responding to treatment with corticosteroids or other immunosuppressive drugs, the doctor may recommend continuing ICIs.</p> <p>***Colitis in patients with a good prognosis:** Patients with a good prognosis for their cancer, such as those with early-stage disease, may be more likely to benefit from continuing ICIs, even if they have colitis.</p> <p>***Colitis in patients with few other treatment options:** Patients with few other treatment options, such as those with advanced cancer or cancer that has not responded to other treatments, may also be more likely to benefit from continuing ICIs, even if they have colitis.</p> <p>The decision of whether or not to continue ICIs in a patient with suspected colitis should be made on a case-by-case basis, considering the patient's individual risks and benefits. The doctor will weigh the potential benefits of continuing ICIs against the potential risks of exacerbating the colitis or developing other immune-related adverse events (irAEs).</p> <p>If you have any questions or concerns about whether or not to continue ICIs if you have suspected colitis, please talk to your doctor.</p> <p>Here are some factors that the doctor may consider when making the decision of whether or not to continue ICIs in a patient with suspected colitis:</p> <p>* The severity of the colitis</p> | <p>The diagnostic criteria for grade 3 colitis or diarrhea from immune checkpoint inhibitors (ICIs) are as follows:</p> <p>**Colitis:**</p> <ul style="list-style-type: none"> <li>* Increase in stool frequency of <math>\geq 7</math> stools per day above baseline</li> <li>* Presence of abdominal pain</li> <li>* Presence of rectal bleeding</li> <li>* Presence of peritoneal signs with ileus and fever consistent with bowel perforation</li> </ul> <p>**Diarrhea:**</p> <ul style="list-style-type: none"> <li>* Increase in stool frequency of <math>\geq 7</math> stools per day above baseline</li> <li>* Presence of abdominal cramps</li> <li>* Presence of dehydration</li> <li>* Presence of electrolyte imbalances</li> </ul> <p>If a patient meets any of the above criteria, they are considered to have grade 3 colitis or diarrhea from ICIs. Treatment for grade 3 colitis or diarrhea from ICIs typically involves high-dose corticosteroids and other immunosuppressive drugs.</p> <p>It is important to note that the diagnostic criteria for grade 3 colitis or diarrhea from ICIs are based on symptoms and clinical signs. There is no specific laboratory test that can be used to diagnose ICI colitis or diarrhea.</p> <p>If you have any questions or concerns about the diagnostic criteria for grade 3 colitis or diarrhea from ICIs, please talk to your doctor.</p> | <p>The primary treatments for immune checkpoint inhibitor-associated colitis (ICI-colitis) that does not respond to high-dose steroids include:</p> <p>***Infliximab (Remicade):** Infliximab is a biologic drug that blocks the effects of tumor necrosis factor-alpha (TNF-alpha), a cytokine that plays a role in inflammation. Infliximab is often used to treat ICI-colitis that does not respond to high-dose steroids.</p> <p>***Vedolizumab (Entyvio):** Vedolizumab is another biologic drug that is used to treat ICI-colitis. It works by blocking the migration of alpha-4 beta-7 integrin-expressing T cells to the gut, which reduces inflammation.</p> <p>***Tofacitinib (Xeljanz):** Tofacitinib is an oral JAK inhibitor that is used to treat a variety of inflammatory conditions, including ICI-colitis. It works by blocking the activity of Janus kinases, which are proteins that play a role in inflammation.</p> <p>***Fecal microbiota transplantation (FMT):** FMT is a procedure in which stool from a healthy donor is transplanted into the colon of a patient with ICI-colitis. FMT has been shown to be effective in treating some cases of ICI-colitis that do not respond to other treatments.</p> <p>The choice of treatment for ICI-colitis that does not respond to high-dose steroids will depend on the patient's individual circumstances and preferences. The doctor will discuss the risks and benefits of each treatment option with the patient before making a decision.</p> <p>Other treatments that may be considered for ICI-colitis that does not respond to high-dose steroids include:</p> <p>***Cyclosporine**</p> <p>***Azathioprine**</p> <p>***Methotrexate**</p> <p>***Cytomegalovirus (CMV) prophylaxis**</p> <p>It is important to note that all of these treatments can have side effects. The doctor will monitor the patient closely for side effects and adjust the treatment plan as needed.</p> <p>If you have any questions or concerns about the treatment</p> |

|  |                                                                                                                                                                                                                                                                                                                                                                                                                             |                                                                                                                                                                                                                                                                                                                                                                                                                                                                                                                                                        |                                                                                                                                                                                                                                                                                                                                                                                                                                     |  |                                                                                                         |
|--|-----------------------------------------------------------------------------------------------------------------------------------------------------------------------------------------------------------------------------------------------------------------------------------------------------------------------------------------------------------------------------------------------------------------------------|--------------------------------------------------------------------------------------------------------------------------------------------------------------------------------------------------------------------------------------------------------------------------------------------------------------------------------------------------------------------------------------------------------------------------------------------------------------------------------------------------------------------------------------------------------|-------------------------------------------------------------------------------------------------------------------------------------------------------------------------------------------------------------------------------------------------------------------------------------------------------------------------------------------------------------------------------------------------------------------------------------|--|---------------------------------------------------------------------------------------------------------|
|  | <p>antinuclear antibody (ANA) or anti-neutrophil cytoplasmic antibody (ANCA) testing, may be ordered to rule out other causes of colitis.</p> <p>It is important to note that the diagnostic workup for ICI colitis may vary depending on the patient's individual presentation and risk factors.</p> <p>If you have any questions or concerns about the diagnostic workup for ICI colitis, please talk to your doctor.</p> | <p>colitis. For example, a patient with ICI-associated colitis may also have an infection.</p> <p>The doctor will carefully consider the patient's medical history, symptoms, and physical examination to determine the most likely diagnosis. If necessary, they may order additional tests, such as colonoscopy, biopsy, and stool cultures, to confirm the diagnosis and rule out other causes of colitis.</p> <p>If you have any questions or concerns about the differential diagnosis of ICI-associated colitis, please talk to your doctor.</p> | <ul style="list-style-type: none"> <li>* The patient's response to treatment for the colitis</li> <li>* The patient's prognosis for their cancer</li> <li>* The patient's other treatment options</li> <li>* The patient's preferences</li> </ul> <p>It is important to note that there is no right or wrong answer to this question. The best decision for each patient will vary depending on their individual circumstances.</p> |  | <p>options for ICI-colitis that does not respond to high-dose steroids, please talk to your doctor.</p> |
|--|-----------------------------------------------------------------------------------------------------------------------------------------------------------------------------------------------------------------------------------------------------------------------------------------------------------------------------------------------------------------------------------------------------------------------------|--------------------------------------------------------------------------------------------------------------------------------------------------------------------------------------------------------------------------------------------------------------------------------------------------------------------------------------------------------------------------------------------------------------------------------------------------------------------------------------------------------------------------------------------------------|-------------------------------------------------------------------------------------------------------------------------------------------------------------------------------------------------------------------------------------------------------------------------------------------------------------------------------------------------------------------------------------------------------------------------------------|--|---------------------------------------------------------------------------------------------------------|

|                        | Hepatitis                                                                                                                                                                                                                                                                                                                                                                                                                                                                                                                                                                                                                                                                                                                                                                                                                                                                                                                                                                                                                                                                                                                                                                                                                                                                                                                                                                                                                                                                                                                                                                                                                                                                                     | Hepatitis                                                                                                                                                                                                                                                                                                                                                                                                                                                                                                                                                                                                                                                                                                                                                                                                                                                                                                                                                                                                                                                                                                                                                                                                                                                                                                                                                                                                                                                                                                                                                                                                                                                                                                                                                                                                        | Hepatitis                                                                                                                                                                                                                                                                                                                                                                                                                                                                                                                                                                                                                                                                                                                                                                                                                                                                                                                                                                                                                                                                                                                                                                                                                                                                                                                                                                                                                                                                                                                                                                                                                                                                                                                                                                           | Hepatitis                                                                                                                                                                                                                                                                                                                                                                                                                                                                                                                                                                                                                                                                                                                                                                                                                                                                                                                                                                                                                          | Hepatitis                                                                                                                                                                                                                                                                                                                                                                                                                                                                                                                                                                                                                                                                                                                                                                                                                                                                                                                                                                                                                                                                                                                                                                                                                                                                                                                                                                                                                                                                                                                                                                                                                                                                                                                                                                                                                                                                                                                                                                                                                             |
|------------------------|-----------------------------------------------------------------------------------------------------------------------------------------------------------------------------------------------------------------------------------------------------------------------------------------------------------------------------------------------------------------------------------------------------------------------------------------------------------------------------------------------------------------------------------------------------------------------------------------------------------------------------------------------------------------------------------------------------------------------------------------------------------------------------------------------------------------------------------------------------------------------------------------------------------------------------------------------------------------------------------------------------------------------------------------------------------------------------------------------------------------------------------------------------------------------------------------------------------------------------------------------------------------------------------------------------------------------------------------------------------------------------------------------------------------------------------------------------------------------------------------------------------------------------------------------------------------------------------------------------------------------------------------------------------------------------------------------|------------------------------------------------------------------------------------------------------------------------------------------------------------------------------------------------------------------------------------------------------------------------------------------------------------------------------------------------------------------------------------------------------------------------------------------------------------------------------------------------------------------------------------------------------------------------------------------------------------------------------------------------------------------------------------------------------------------------------------------------------------------------------------------------------------------------------------------------------------------------------------------------------------------------------------------------------------------------------------------------------------------------------------------------------------------------------------------------------------------------------------------------------------------------------------------------------------------------------------------------------------------------------------------------------------------------------------------------------------------------------------------------------------------------------------------------------------------------------------------------------------------------------------------------------------------------------------------------------------------------------------------------------------------------------------------------------------------------------------------------------------------------------------------------------------------|-------------------------------------------------------------------------------------------------------------------------------------------------------------------------------------------------------------------------------------------------------------------------------------------------------------------------------------------------------------------------------------------------------------------------------------------------------------------------------------------------------------------------------------------------------------------------------------------------------------------------------------------------------------------------------------------------------------------------------------------------------------------------------------------------------------------------------------------------------------------------------------------------------------------------------------------------------------------------------------------------------------------------------------------------------------------------------------------------------------------------------------------------------------------------------------------------------------------------------------------------------------------------------------------------------------------------------------------------------------------------------------------------------------------------------------------------------------------------------------------------------------------------------------------------------------------------------------------------------------------------------------------------------------------------------------------------------------------------------------------------------------------------------------|------------------------------------------------------------------------------------------------------------------------------------------------------------------------------------------------------------------------------------------------------------------------------------------------------------------------------------------------------------------------------------------------------------------------------------------------------------------------------------------------------------------------------------------------------------------------------------------------------------------------------------------------------------------------------------------------------------------------------------------------------------------------------------------------------------------------------------------------------------------------------------------------------------------------------------------------------------------------------------------------------------------------------------|---------------------------------------------------------------------------------------------------------------------------------------------------------------------------------------------------------------------------------------------------------------------------------------------------------------------------------------------------------------------------------------------------------------------------------------------------------------------------------------------------------------------------------------------------------------------------------------------------------------------------------------------------------------------------------------------------------------------------------------------------------------------------------------------------------------------------------------------------------------------------------------------------------------------------------------------------------------------------------------------------------------------------------------------------------------------------------------------------------------------------------------------------------------------------------------------------------------------------------------------------------------------------------------------------------------------------------------------------------------------------------------------------------------------------------------------------------------------------------------------------------------------------------------------------------------------------------------------------------------------------------------------------------------------------------------------------------------------------------------------------------------------------------------------------------------------------------------------------------------------------------------------------------------------------------------------------------------------------------------------------------------------------------------|
| Question               | What is the primary diagnostic workup for suspected immune checkpoint inhibitor hepatitis?                                                                                                                                                                                                                                                                                                                                                                                                                                                                                                                                                                                                                                                                                                                                                                                                                                                                                                                                                                                                                                                                                                                                                                                                                                                                                                                                                                                                                                                                                                                                                                                                    | What are other conditions in the differential diagnosis when considering immune checkpoint inhibitor associated hepatitis?                                                                                                                                                                                                                                                                                                                                                                                                                                                                                                                                                                                                                                                                                                                                                                                                                                                                                                                                                                                                                                                                                                                                                                                                                                                                                                                                                                                                                                                                                                                                                                                                                                                                                       | Are there any situations where immune checkpoint inhibitors can be continued even if hepatitis is suspected?                                                                                                                                                                                                                                                                                                                                                                                                                                                                                                                                                                                                                                                                                                                                                                                                                                                                                                                                                                                                                                                                                                                                                                                                                                                                                                                                                                                                                                                                                                                                                                                                                                                                        | What are the diagnostic criteria for grade 3 hepatitis from immune checkpoint inhibitors?                                                                                                                                                                                                                                                                                                                                                                                                                                                                                                                                                                                                                                                                                                                                                                                                                                                                                                                                          | What are the primary treatments for immune checkpoint inhibitor-associated hepatitis that does not respond to high-dose steroids?                                                                                                                                                                                                                                                                                                                                                                                                                                                                                                                                                                                                                                                                                                                                                                                                                                                                                                                                                                                                                                                                                                                                                                                                                                                                                                                                                                                                                                                                                                                                                                                                                                                                                                                                                                                                                                                                                                     |
| Answer Engine 2 (Bard) | <p>The primary diagnostic workup for suspected immune checkpoint inhibitor (ICI) hepatitis includes:</p> <p>***History and physical examination:** The doctor will ask about the patient's symptoms, medical history, and medications. They will also perform a physical examination to look for signs of liver disease, such as jaundice, hepatomegaly, and splenomegaly.</p> <p>***Laboratory tests:** The doctor may order the following laboratory tests:</p> <ul style="list-style-type: none"> <li>* Liver function tests (LFTs) to check for liver damage</li> <li>* Comprehensive metabolic panel (CMP) to check for kidney toxicity, electrolyte abnormalities, and other metabolic problems</li> <li>* Viral serologies to rule out viral hepatitis</li> <li>* Autoimmune markers, such as antinuclear antibody (ANA) and anti-smooth muscle antibody (ASMA), to rule out autoimmune hepatitis</li> <li>* Liver imaging, such as ultrasound, CT scan, or MRI, to look for structural abnormalities of the liver</li> </ul> <p>Other tests that may be ordered depending on the patient's presentation include:</p> <p>***Iron studies:** To rule out iron-overload hepatitis</p> <p>***Ceruloplasmin and copper levels:** To rule out Wilson's disease</p> <p>***Alpha-1 antitrypsin:** To rule out alpha-1 antitrypsin deficiency</p> <p>If the patient has a high index of suspicion for ICI hepatitis, a liver biopsy may be recommended to confirm the diagnosis and assess the severity of the liver damage.</p> <p>The doctor will carefully consider the patient's medical history, symptoms, physical examination, and laboratory findings to determine the most likely</p> | <p>The differential diagnosis for immune checkpoint inhibitor (ICI)-associated hepatitis includes a wide range of conditions that can cause inflammation of the liver. These conditions include:</p> <p>***Drug-induced liver injury (DILI):** This is the most common cause of liver injury, and it can be caused by a variety of medications, including ICIs.</p> <p>***Viral hepatitis:** This is inflammation of the liver caused by a virus, such as hepatitis A, B, or C.</p> <p>***Autoimmune hepatitis:** This is a chronic inflammatory liver disease that is caused by the body's own immune system attacking the liver cells.</p> <p>***Alcoholic hepatitis:** This is inflammation of the liver caused by excessive alcohol consumption.</p> <p>***Nonalcoholic steatohepatitis (NASH):** This is a type of fatty liver disease that is not caused by alcohol consumption.</p> <p>***Wilson's disease:** This is a rare genetic disorder that causes copper to build up in the liver.</p> <p>***Alpha-1 antitrypsin deficiency:** This is a rare genetic disorder that can cause liver damage and emphysema.</p> <p>Other conditions that may be considered in the differential diagnosis of ICI-associated hepatitis include:</p> <p>***Biliary obstruction:** This is a blockage of the bile ducts, which prevents bile from flowing from the liver to the intestines.</p> <p>***Heart failure:** This can cause congestion of the liver, which can lead to inflammation.</p> <p>***Shock:** This can cause decreased blood flow to the liver, which can lead to inflammation and damage.</p> <p>***Cancer:** Cancer of the liver or other organs can spread to the liver and cause inflammation.</p> <p>It is important to note that some of these conditions can coexist with ICI-associated</p> | <p>Yes, there are some situations where immune checkpoint inhibitors (ICIs) can be continued even if hepatitis is suspected. These situations include:</p> <p>***Mild hepatitis:** If the hepatitis is mild, with symptoms such as elevated liver enzymes but no other clinical manifestations, the doctor may recommend continuing ICIs with close monitoring.</p> <p>***Hepatitis that is responding to treatment:** If the hepatitis is responding to treatment with corticosteroids or other immunosuppressive drugs, the doctor may recommend continuing ICIs.</p> <p>***Hepatitis in patients with a good prognosis:** Patients with a good prognosis for their cancer, such as those with early-stage disease, may be more likely to benefit from continuing ICIs, even if they have hepatitis.</p> <p>***Hepatitis in patients with few other treatment options:** Patients with few other treatment options, such as those with advanced cancer or cancer that has not responded to other treatments, may also be more likely to benefit from continuing ICIs, even if they have hepatitis.</p> <p>The decision of whether or not to continue ICIs in a patient with suspected hepatitis should be made on a case-by-case basis, considering the patient's individual risks and benefits. The doctor will weigh the potential benefits of continuing ICIs against the potential risks of exacerbating the hepatitis or developing other immune-related adverse events (irAEs).</p> <p>If you have any questions or concerns about whether or not to continue ICIs if you have suspected hepatitis, please talk to your doctor.</p> <p>Here are some factors that the doctor may consider when making the decision of whether or not to continue ICIs in a patient with</p> | <p>The diagnostic criteria for grade 3 hepatitis from immune checkpoint inhibitors (ICIs) are as follows:</p> <p>***Total bilirubin <math>\geq 2.5 \times</math> upper limit of normal (ULN)**</p> <p>***Aspartate aminotransferase (AST) or alanine aminotransferase (ALT) <math>\geq 5 \times</math> ULN**</p> <p>If a patient meets both of the above criteria, they are considered to have grade 3 hepatitis from ICIs.</p> <p>It is important to note that the diagnostic criteria for grade 3 hepatitis from ICIs are based on laboratory findings. There is no specific clinical presentation that is associated with grade 3 hepatitis from ICIs.</p> <p>Patients with grade 3 hepatitis from ICIs typically require hospitalization for intravenous fluids, electrolytes, and monitoring. Treatment also typically includes corticosteroids or other immunosuppressive drugs.</p> <p>If you have any questions or concerns about the diagnostic criteria for grade 3 hepatitis from ICIs, please talk to your doctor.</p> | <p>The primary treatments for immune checkpoint inhibitor-associated hepatitis (ICI-hepatitis) that does not respond to high-dose steroids include:</p> <p>***Infliximab (Remicade):** Infliximab is a biologic drug that blocks the effects of tumor necrosis factor-alpha (TNF-alpha), a cytokine that plays a role in inflammation. Infliximab is often used to treat ICI-hepatitis that does not respond to high-dose steroids.</p> <p>***Vedolizumab (Entyvio):** Vedolizumab is another biologic drug that is used to treat ICI-hepatitis. It works by blocking the migration of alpha-4 beta-7 integrin-expressing T cells to the gut, which reduces inflammation.</p> <p>***Tofacitinib (Xeljanz):** Tofacitinib is an oral JAK inhibitor that is used to treat a variety of inflammatory conditions, including ICI-hepatitis. It works by blocking the activity of Janus kinases, which are proteins that play a role in inflammation.</p> <p>***Baricitinib (Olumiant):** Baricitinib is another oral JAK inhibitor that is used to treat ICI-hepatitis. It works by blocking the activity of Janus kinases, which are proteins that play a role in inflammation.</p> <p>The choice of treatment for ICI-hepatitis that does not respond to high-dose steroids will depend on the patient's individual circumstances and preferences. The doctor will discuss the risks and benefits of each treatment option with the patient before making a decision.</p> <p>Other treatments that may be considered for ICI-hepatitis that does not respond to high-dose steroids include:</p> <p>***Cyclosporine**</p> <p>***Tacrolimus (Prograf)**</p> <p>***Azathioprine**</p> <p>***Methotrexate**</p> <p>***Mycophenolate mofetil (CellCept)**</p> <p>***Fecal microbiota transplantation (FMT)**</p> <p>It is important to note that all of these treatments can have side effects. The doctor will monitor the patient closely for side effects and adjust the treatment plan as needed.</p> <p>If you have any questions or</p> |

|  |                                                                                                                                                                                                                                                                                           |                                                                                                                                                                                                                                                                                                                                                                                                                                                                                                                                                                          |                                                                                                                                                                                                                                                                                                                                                                                                                                                                                                            |                                                                                                                                                                                                                                                                                                                                                                                                                                                                                                                                                                                                                                                                                                                                                                                                                                                                                                                                          |
|--|-------------------------------------------------------------------------------------------------------------------------------------------------------------------------------------------------------------------------------------------------------------------------------------------|--------------------------------------------------------------------------------------------------------------------------------------------------------------------------------------------------------------------------------------------------------------------------------------------------------------------------------------------------------------------------------------------------------------------------------------------------------------------------------------------------------------------------------------------------------------------------|------------------------------------------------------------------------------------------------------------------------------------------------------------------------------------------------------------------------------------------------------------------------------------------------------------------------------------------------------------------------------------------------------------------------------------------------------------------------------------------------------------|------------------------------------------------------------------------------------------------------------------------------------------------------------------------------------------------------------------------------------------------------------------------------------------------------------------------------------------------------------------------------------------------------------------------------------------------------------------------------------------------------------------------------------------------------------------------------------------------------------------------------------------------------------------------------------------------------------------------------------------------------------------------------------------------------------------------------------------------------------------------------------------------------------------------------------------|
|  | <p>diagnosis. If necessary, they may order additional tests, such as liver biopsy, to confirm the diagnosis and rule out other causes of hepatitis.</p> <p>If you have any questions or concerns about the diagnostic workup for suspected ICI hepatitis, please talk to your doctor.</p> | <p>hepatitis. For example, a patient with ICI-associated hepatitis may also have DILI from another medication.</p> <p>The doctor will carefully consider the patient's medical history, symptoms, physical examination, and laboratory findings to determine the most likely diagnosis. If necessary, they may order additional tests, such as liver biopsy, to confirm the diagnosis and rule out other causes of hepatitis.</p> <p>If you have any questions or concerns about the differential diagnosis of ICI-associated hepatitis, please talk to your doctor.</p> | <p>suspected hepatitis:</p> <ul style="list-style-type: none"> <li>* The severity of the hepatitis</li> <li>* The patient's response to treatment for the hepatitis</li> <li>* The patient's prognosis for their cancer</li> <li>* The patient's other treatment options</li> <li>* The patient's preferences</li> </ul> <p>It is important to note that there is no right or wrong answer to this question. The best decision for each patient will vary depending on their individual circumstances.</p> | <p>concerns about the treatment options for ICI-hepatitis that does not respond to high-dose steroids, please talk to your doctor.</p> <p><b>**Additional notes:**</b></p> <p><b>***Fecal microbiota transplantation (FMT)**</b> is a procedure in which stool from a healthy donor is transplanted into the colon of a patient with ICI-hepatitis. FMT has been shown to be effective in treating some cases of ICI-hepatitis that do not respond to other treatments.</p> <p><b>***Liver biopsy**</b> may be recommended to confirm the diagnosis of ICI-hepatitis and assess the severity of the liver damage.</p> <p><b>***Close monitoring**</b> is important for patients with ICI-hepatitis, even if they are responding to treatment. This is because ICI-hepatitis can worsen suddenly, even in patients who are doing well.</p> <p>I hope this information is helpful. Please let me know if you have any other questions.</p> |
|--|-------------------------------------------------------------------------------------------------------------------------------------------------------------------------------------------------------------------------------------------------------------------------------------------|--------------------------------------------------------------------------------------------------------------------------------------------------------------------------------------------------------------------------------------------------------------------------------------------------------------------------------------------------------------------------------------------------------------------------------------------------------------------------------------------------------------------------------------------------------------------------|------------------------------------------------------------------------------------------------------------------------------------------------------------------------------------------------------------------------------------------------------------------------------------------------------------------------------------------------------------------------------------------------------------------------------------------------------------------------------------------------------------|------------------------------------------------------------------------------------------------------------------------------------------------------------------------------------------------------------------------------------------------------------------------------------------------------------------------------------------------------------------------------------------------------------------------------------------------------------------------------------------------------------------------------------------------------------------------------------------------------------------------------------------------------------------------------------------------------------------------------------------------------------------------------------------------------------------------------------------------------------------------------------------------------------------------------------------|

|                        | Pneumonitis                                                                                                                                                                                                                                                                                                                                                                                                                                                                                                                                                                                                                                                                                                                                                                                                                                                                                                                                                                                                                                                                                                                                                                                                                                                                                                                                                                                                                                                                                                                                                                                                                                                                                                   | Pneumonitis                                                                                                                                                                                                                                                                                                                                                                                                                                                                                                                                                                                                                                                                                                                                                                                                                                                                                                                                                                                                                                                                                                                                                                                                                                                                                                                                                                                                                                                                                                                                                                                                                                                                                                                                                                                                                                                                                                    | Pneumonitis                                                                                                                                                                                                                                                                                                                                                                                                                                                                                                                                                                                                                                                                                                                                                                                                                                                                                                                                                                                                                                                                                                                                                                                                                                                                                                                                                                                                                                                                                                                                                                                                                                                                                                                                                      | Pneumonitis                                                                                                                                                                                                                                                                                                                                                                                                                                                                                                                                                                                                                                                                                                                                                                                                                                                                                                                                                                                                                                                                                                                                                                                                                                                                                                         | Pneumonitis                                                                                                                                                                                                                                                                                                                                                                                                                                                                                                                                                                                                                                                                                                                                                                                                                                                                                                                                                                                                                                                                                                                                                                                                                                                                                                                                                                                                                                                                                                                                                                                                                                                                                                                                                                                                                                                                                                                                                                                                                                                                                                                                 |
|------------------------|---------------------------------------------------------------------------------------------------------------------------------------------------------------------------------------------------------------------------------------------------------------------------------------------------------------------------------------------------------------------------------------------------------------------------------------------------------------------------------------------------------------------------------------------------------------------------------------------------------------------------------------------------------------------------------------------------------------------------------------------------------------------------------------------------------------------------------------------------------------------------------------------------------------------------------------------------------------------------------------------------------------------------------------------------------------------------------------------------------------------------------------------------------------------------------------------------------------------------------------------------------------------------------------------------------------------------------------------------------------------------------------------------------------------------------------------------------------------------------------------------------------------------------------------------------------------------------------------------------------------------------------------------------------------------------------------------------------|----------------------------------------------------------------------------------------------------------------------------------------------------------------------------------------------------------------------------------------------------------------------------------------------------------------------------------------------------------------------------------------------------------------------------------------------------------------------------------------------------------------------------------------------------------------------------------------------------------------------------------------------------------------------------------------------------------------------------------------------------------------------------------------------------------------------------------------------------------------------------------------------------------------------------------------------------------------------------------------------------------------------------------------------------------------------------------------------------------------------------------------------------------------------------------------------------------------------------------------------------------------------------------------------------------------------------------------------------------------------------------------------------------------------------------------------------------------------------------------------------------------------------------------------------------------------------------------------------------------------------------------------------------------------------------------------------------------------------------------------------------------------------------------------------------------------------------------------------------------------------------------------------------------|------------------------------------------------------------------------------------------------------------------------------------------------------------------------------------------------------------------------------------------------------------------------------------------------------------------------------------------------------------------------------------------------------------------------------------------------------------------------------------------------------------------------------------------------------------------------------------------------------------------------------------------------------------------------------------------------------------------------------------------------------------------------------------------------------------------------------------------------------------------------------------------------------------------------------------------------------------------------------------------------------------------------------------------------------------------------------------------------------------------------------------------------------------------------------------------------------------------------------------------------------------------------------------------------------------------------------------------------------------------------------------------------------------------------------------------------------------------------------------------------------------------------------------------------------------------------------------------------------------------------------------------------------------------------------------------------------------------------------------------------------------------|---------------------------------------------------------------------------------------------------------------------------------------------------------------------------------------------------------------------------------------------------------------------------------------------------------------------------------------------------------------------------------------------------------------------------------------------------------------------------------------------------------------------------------------------------------------------------------------------------------------------------------------------------------------------------------------------------------------------------------------------------------------------------------------------------------------------------------------------------------------------------------------------------------------------------------------------------------------------------------------------------------------------------------------------------------------------------------------------------------------------------------------------------------------------------------------------------------------------------------------------------------------------------------------------------------------------|---------------------------------------------------------------------------------------------------------------------------------------------------------------------------------------------------------------------------------------------------------------------------------------------------------------------------------------------------------------------------------------------------------------------------------------------------------------------------------------------------------------------------------------------------------------------------------------------------------------------------------------------------------------------------------------------------------------------------------------------------------------------------------------------------------------------------------------------------------------------------------------------------------------------------------------------------------------------------------------------------------------------------------------------------------------------------------------------------------------------------------------------------------------------------------------------------------------------------------------------------------------------------------------------------------------------------------------------------------------------------------------------------------------------------------------------------------------------------------------------------------------------------------------------------------------------------------------------------------------------------------------------------------------------------------------------------------------------------------------------------------------------------------------------------------------------------------------------------------------------------------------------------------------------------------------------------------------------------------------------------------------------------------------------------------------------------------------------------------------------------------------------|
| Question               | What is the primary diagnostic workup for suspected immune checkpoint inhibitor pneumonitis?                                                                                                                                                                                                                                                                                                                                                                                                                                                                                                                                                                                                                                                                                                                                                                                                                                                                                                                                                                                                                                                                                                                                                                                                                                                                                                                                                                                                                                                                                                                                                                                                                  | What are other conditions in the differential diagnosis when considering immune checkpoint inhibitor associated pneumonitis?                                                                                                                                                                                                                                                                                                                                                                                                                                                                                                                                                                                                                                                                                                                                                                                                                                                                                                                                                                                                                                                                                                                                                                                                                                                                                                                                                                                                                                                                                                                                                                                                                                                                                                                                                                                   | Are there any situations where immune checkpoint inhibitors can be continued even if pneumonitis is suspected?                                                                                                                                                                                                                                                                                                                                                                                                                                                                                                                                                                                                                                                                                                                                                                                                                                                                                                                                                                                                                                                                                                                                                                                                                                                                                                                                                                                                                                                                                                                                                                                                                                                   | What are the diagnostic criteria for grade 3 pneumonitis from immune checkpoint inhibitors?                                                                                                                                                                                                                                                                                                                                                                                                                                                                                                                                                                                                                                                                                                                                                                                                                                                                                                                                                                                                                                                                                                                                                                                                                         | What are the primary treatments for immune checkpoint inhibitor-associated pneumonitis that does not respond to high-dose steroids?                                                                                                                                                                                                                                                                                                                                                                                                                                                                                                                                                                                                                                                                                                                                                                                                                                                                                                                                                                                                                                                                                                                                                                                                                                                                                                                                                                                                                                                                                                                                                                                                                                                                                                                                                                                                                                                                                                                                                                                                         |
| Answer Engine 2 (Bard) | <p>The primary diagnostic workup for suspected immune checkpoint inhibitor (ICI) pneumonitis includes:</p> <p>***History and physical examination:** The doctor will ask about the patient's symptoms, medical history, and medications. They will also perform a physical examination to look for signs of pneumonitis, such as tachypnea, hypoxia, and crackles in the lungs.</p> <p>***Laboratory tests:** The doctor may order the following laboratory tests:</p> <ul style="list-style-type: none"> <li>* Complete blood count (CBC) to check for anemia and leukocytosis</li> <li>* Comprehensive metabolic panel (CMP) to check for kidney toxicity, electrolyte abnormalities, and other metabolic problems</li> <li>* Arterial blood gas (ABG) to check the oxygen levels in the blood</li> <li>* Coagulation studies to check for bleeding problems</li> </ul> <p>***Imaging tests:** The doctor may order a chest X-ray or chest CT scan to look for signs of pneumonia, such as infiltrates or ground-glass opacities.</p> <p>***Pulmonary function tests (PFTs):** PFTs can be used to assess the severity of lung damage.</p> <p>***Bronchoscopy with bronchoalveolar lavage (BAL):** Bronchoscopy is a procedure in which a thin, flexible tube with a camera on the end is inserted into the lungs to look for signs of inflammation. BAL is a procedure in which fluid is washed into and out of the lungs to collect samples of cells and other material. BAL fluid can be analyzed to look for signs of infection and inflammation.</p> <p>Other tests that may be ordered depending on the patient's presentation include:</p> <p>***Cultures of BAL fluid and sputum:** To rule out</p> | <p>The differential diagnosis for immune checkpoint inhibitor (ICI)-associated pneumonitis includes a wide range of conditions that can cause inflammation of the lungs. These conditions include:</p> <p>***Infectious pneumonitis:** This is the most common cause of pneumonitis, and it can be caused by a variety of bacteria, viruses, and fungi.</p> <p>***Other immune-related adverse events (irAEs):** ICIs can cause a variety of irAEs, including other types of pneumonitis, such as organizing pneumonia and hypersensitivity pneumonitis.</p> <p>***Radiation pneumonitis:** This is inflammation of the lungs that can occur as a side effect of radiation therapy.</p> <p>***Heart failure:** This can cause congestion of the lungs, which can lead to inflammation.</p> <p>***Pulmonary embolism:** This is a blood clot that lodges in the lungs, which can cause inflammation and damage.</p> <p>***Acute respiratory distress syndrome (ARDS):** This is a severe form of respiratory failure that can be caused by a variety of factors, including infection, inflammation, and trauma.</p> <p>***Cancer:** Cancer of the lungs or other organs can spread to the lungs and cause inflammation.</p> <p>Other conditions that may be considered in the differential diagnosis of ICI-associated pneumonitis include:</p> <p>***Drug-induced lung injury (DILI):** This is inflammation of the lungs caused by a medication, such as ICIs.</p> <p>***Connective tissue disease:** Connective tissue diseases, such as rheumatoid arthritis and systemic lupus erythematosus, can cause inflammation of the lungs.</p> <p>***Sarcoidosis:** This is a chronic inflammatory disease that can affect the lungs, lymph nodes, and other organs.</p> <p>***Occupational lung diseases:** Exposure to certain substances at work, such as asbestos and silica, can cause lung diseases that</p> | <p>Yes, there are some situations where immune checkpoint inhibitors (ICIs) can be continued even if pneumonitis is suspected. These situations include:</p> <p>***Mild pneumonitis:** If the pneumonitis is mild, with symptoms such as occasional cough and shortness of breath, and there are no signs of hypoxia or respiratory failure, the doctor may recommend continuing ICIs with close monitoring.</p> <p>***Pneumonitis that is responding to treatment:** If the pneumonitis is responding to treatment with corticosteroids or other immunosuppressive drugs, the doctor may recommend continuing ICIs.</p> <p>***Pneumonitis in patients with a good prognosis:** Patients with a good prognosis for their cancer, such as those with early-stage disease, may be more likely to benefit from continuing ICIs, even if they have pneumonitis.</p> <p>***Pneumonitis in patients with other treatment options:** Patients with few other treatment options, such as those with advanced cancer or cancer that has not responded to other treatments, may also be more likely to benefit from continuing ICIs, even if they have pneumonitis.</p> <p>The decision of whether or not to continue ICIs in a patient with suspected pneumonitis should be made on a case-by-case basis, considering the patient's individual risks and benefits. The doctor will weigh the potential benefits of continuing ICIs against the potential risks of exacerbating the pneumonitis or developing other immune-related adverse events (irAEs).</p> <p>If you have any questions or concerns about whether or not to continue ICIs if you have suspected pneumonitis, please talk to your doctor.</p> <p>Here are some factors that the doctor may consider</p> | <p>The diagnostic criteria for grade 3 pneumonitis from immune checkpoint inhibitors (ICIs) are as follows:</p> <p>***New or worsening respiratory symptoms**</p> <p>***Oxygen saturation <math>\leq</math> 90% on room air**</p> <p>***Requirement for supplemental oxygen**</p> <p>If a patient meets all three of the above criteria, they are considered to have grade 3 pneumonitis from ICIs.</p> <p>Other criteria that may be used to diagnose grade 3 pneumonitis from ICIs include:</p> <p>***New or worsening infiltrates on chest X-ray or CT scan**</p> <p>***New or worsening restrictive or obstructive defects on pulmonary function tests (PFTs)**</p> <p>***New or worsening hypoxemia on arterial blood gas (ABG)**</p> <p>The doctor will use the patient's symptoms, physical examination, laboratory findings, and imaging results to determine the severity of the pneumonitis and make a diagnosis of grade 3 pneumonitis.</p> <p>Patients with grade 3 pneumonitis from ICIs typically require hospitalization for close monitoring and treatment. Treatment typically includes high-dose corticosteroids and other immunosuppressive drugs.</p> <p>If you have any questions or concerns about the diagnostic criteria for grade 3 pneumonitis from ICIs, please talk to your doctor.</p> | <p>The primary treatments for immune checkpoint inhibitor (ICI)-associated pneumonitis that does not respond to high-dose steroids include:</p> <p>***Infliximab (Remicade):** Infliximab is a biologic drug that blocks the effects of tumor necrosis factor-alpha (TNF-alpha), a cytokine that plays a role in inflammation. Infliximab is often used to treat ICI-associated pneumonitis that does not respond to high-dose steroids.</p> <p>***Vedolizumab (Entyvio):** Vedolizumab is another biologic drug that is used to treat ICI-associated pneumonitis. It works by blocking the migration of alpha-4 beta-7 integrin-expressing T cells to the lungs, which reduces inflammation.</p> <p>***Tocilizumab (Actemra):** Tocilizumab is a biologic drug that blocks the effects of interleukin-6 (IL-6), a cytokine that plays a role in inflammation. Tocilizumab is often used to treat ICI-associated pneumonitis that does not respond to other treatments.</p> <p>***Baricitinib (Olumiant):** Baricitinib is an oral JAK inhibitor that is used to treat a variety of inflammatory conditions, including ICI-associated pneumonitis. It works by blocking the activity of Janus kinases, which are proteins that play a role in inflammation.</p> <p>***Fecal microbiota transplantation (FMT):** FMT is a procedure in which stool from a healthy donor is transplanted into the colon of a patient with ICI-associated pneumonitis. FMT has been shown to be effective in treating some cases of ICI-associated pneumonitis that do not respond to other treatments.</p> <p>The choice of treatment for ICI-associated pneumonitis that does not respond to high-dose steroids will depend on the patient's individual circumstances and preferences. The doctor will discuss the risks and benefits of each treatment option with the patient before making a decision.</p> <p>Other treatments that may be considered for ICI-associated pneumonitis that does not respond to high-dose steroids include:</p> <p>***Cyclosporine**</p> <p>***Tacrolimus (Prograf)**</p> <p>***Azathioprine**</p> <p>***Methotrexate**</p> |

|  |                                                                                                                                                                                                                                                                                                                                                                                                                                                                                                                                                                                                                                                                                               |                                                                                                                                                                                                                                                                                                                                                                                                                                                                                                                                                                                                                                                                                                                                                                       |                                                                                                                                                                                                                                                                                                                                                                                                                                                                                                                                                                                                |  |                                                                                                                                                                                                                                                                                                                                                                                                                        |
|--|-----------------------------------------------------------------------------------------------------------------------------------------------------------------------------------------------------------------------------------------------------------------------------------------------------------------------------------------------------------------------------------------------------------------------------------------------------------------------------------------------------------------------------------------------------------------------------------------------------------------------------------------------------------------------------------------------|-----------------------------------------------------------------------------------------------------------------------------------------------------------------------------------------------------------------------------------------------------------------------------------------------------------------------------------------------------------------------------------------------------------------------------------------------------------------------------------------------------------------------------------------------------------------------------------------------------------------------------------------------------------------------------------------------------------------------------------------------------------------------|------------------------------------------------------------------------------------------------------------------------------------------------------------------------------------------------------------------------------------------------------------------------------------------------------------------------------------------------------------------------------------------------------------------------------------------------------------------------------------------------------------------------------------------------------------------------------------------------|--|------------------------------------------------------------------------------------------------------------------------------------------------------------------------------------------------------------------------------------------------------------------------------------------------------------------------------------------------------------------------------------------------------------------------|
|  | <p>infection<br/> ***Autoimmune markers**:<br/> To rule out autoimmune pneumonitis<br/> ***Transbronchial lung biopsy (TBLB)**:<br/> To confirm the diagnosis of ICI pneumonitis and assess the severity of the lung damage</p> <p>The doctor will carefully consider the patient's medical history, symptoms, physical examination, laboratory findings, and imaging results to determine the most likely diagnosis. If necessary, they may order additional tests, such as TBLB, to confirm the diagnosis and rule out other causes of pneumonitis.</p> <p>If you have any questions or concerns about the diagnostic workup for suspected ICI pneumonitis, please talk to your doctor.</p> | <p>can mimic ICI-associated pneumonitis.</p> <p>It is important to note that some of these conditions can coexist with ICI-associated pneumonitis. For example, a patient with ICI-associated pneumonitis may also have infectious pneumonitis.</p> <p>The doctor will carefully consider the patient's medical history, symptoms, physical examination, laboratory findings, and imaging results to determine the most likely diagnosis. If necessary, they may order additional tests, such as bronchoscopy with BAL or transbronchial lung biopsy, to confirm the diagnosis and rule out other causes of pneumonitis.</p> <p>If you have any questions or concerns about the differential diagnosis of ICI-associated pneumonitis, please talk to your doctor.</p> | <p>when making the decision of whether or not to continue ICIs in a patient with suspected pneumonitis:</p> <ul style="list-style-type: none"> <li>* The severity of the pneumonitis</li> <li>* The patient's response to treatment for the pneumonitis</li> <li>* The patient's prognosis for their cancer</li> <li>* The patient's other treatment options</li> <li>* The patient's preferences</li> </ul> <p>It is important to note that there is no right or wrong answer to this question. The best decision for each patient will vary depending on their individual circumstances.</p> |  | <p>***Mycophenolate mofetil (CellCept)**</p> <p>It is important to note that all of these treatments can have side effects. The doctor will monitor the patient closely for side effects and adjust the treatment plan as needed.</p> <p>If you have any questions or concerns about the treatment options for ICI-associated pneumonitis that does not respond to high-dose steroids, please talk to your doctor.</p> |
|--|-----------------------------------------------------------------------------------------------------------------------------------------------------------------------------------------------------------------------------------------------------------------------------------------------------------------------------------------------------------------------------------------------------------------------------------------------------------------------------------------------------------------------------------------------------------------------------------------------------------------------------------------------------------------------------------------------|-----------------------------------------------------------------------------------------------------------------------------------------------------------------------------------------------------------------------------------------------------------------------------------------------------------------------------------------------------------------------------------------------------------------------------------------------------------------------------------------------------------------------------------------------------------------------------------------------------------------------------------------------------------------------------------------------------------------------------------------------------------------------|------------------------------------------------------------------------------------------------------------------------------------------------------------------------------------------------------------------------------------------------------------------------------------------------------------------------------------------------------------------------------------------------------------------------------------------------------------------------------------------------------------------------------------------------------------------------------------------------|--|------------------------------------------------------------------------------------------------------------------------------------------------------------------------------------------------------------------------------------------------------------------------------------------------------------------------------------------------------------------------------------------------------------------------|

|                        | Dermatitis                                                                                                                                                                                                                                                                                                                                                                                                                                                                                                                                                                                                                                                                                                                                                                                                                                                                                                                                                                                                                                                                                                                                                                                                                                                                                                                                                                                                                                                                                                                                            | Dermatitis                                                                                                                                                                                                                                                                                                                                                                                                                                                                                                                                                                                                                                                                                                                                                                                                                                                                                                                                                                                                                                                                                                                                                                                                                                                                                                                                                                                                                                                                                                                                                                                                                                                                                                                                                                                                                                                           | Dermatitis                                                                                                                                                                                                                                                                                                                                                                                                                                                                                                                                                                                                                                                                                                                                                                                                                                                                                                                                                                                                                                                                                                                                                                                                                                                                                                                                                                                                                                                                                                                                                                                                                                                                                                                                                         | Dermatitis                                                                                                                                                                                                                                                                                                                                                                                                                                                                                                                                                                                                                                                                                                                                                                                                                                                                                                                                                                                                                                                                                                                                                                                                                                                                                                                                                                                                                                                                                                                                                                                                                                                                                                                                                                                       | Dermatitis                                                                                                                                                                                                                                                                                                                                                                                                                                                                                                                                                                                                                                                                                                                                                                                                                                                                                                                                                                                                                                                                                                                                                                                                                                                                                                                                                                                                                                                                                                                                                                                                                                                                                                                                                                                                                                                                                                                                                    |
|------------------------|-------------------------------------------------------------------------------------------------------------------------------------------------------------------------------------------------------------------------------------------------------------------------------------------------------------------------------------------------------------------------------------------------------------------------------------------------------------------------------------------------------------------------------------------------------------------------------------------------------------------------------------------------------------------------------------------------------------------------------------------------------------------------------------------------------------------------------------------------------------------------------------------------------------------------------------------------------------------------------------------------------------------------------------------------------------------------------------------------------------------------------------------------------------------------------------------------------------------------------------------------------------------------------------------------------------------------------------------------------------------------------------------------------------------------------------------------------------------------------------------------------------------------------------------------------|----------------------------------------------------------------------------------------------------------------------------------------------------------------------------------------------------------------------------------------------------------------------------------------------------------------------------------------------------------------------------------------------------------------------------------------------------------------------------------------------------------------------------------------------------------------------------------------------------------------------------------------------------------------------------------------------------------------------------------------------------------------------------------------------------------------------------------------------------------------------------------------------------------------------------------------------------------------------------------------------------------------------------------------------------------------------------------------------------------------------------------------------------------------------------------------------------------------------------------------------------------------------------------------------------------------------------------------------------------------------------------------------------------------------------------------------------------------------------------------------------------------------------------------------------------------------------------------------------------------------------------------------------------------------------------------------------------------------------------------------------------------------------------------------------------------------------------------------------------------------|--------------------------------------------------------------------------------------------------------------------------------------------------------------------------------------------------------------------------------------------------------------------------------------------------------------------------------------------------------------------------------------------------------------------------------------------------------------------------------------------------------------------------------------------------------------------------------------------------------------------------------------------------------------------------------------------------------------------------------------------------------------------------------------------------------------------------------------------------------------------------------------------------------------------------------------------------------------------------------------------------------------------------------------------------------------------------------------------------------------------------------------------------------------------------------------------------------------------------------------------------------------------------------------------------------------------------------------------------------------------------------------------------------------------------------------------------------------------------------------------------------------------------------------------------------------------------------------------------------------------------------------------------------------------------------------------------------------------------------------------------------------------|--------------------------------------------------------------------------------------------------------------------------------------------------------------------------------------------------------------------------------------------------------------------------------------------------------------------------------------------------------------------------------------------------------------------------------------------------------------------------------------------------------------------------------------------------------------------------------------------------------------------------------------------------------------------------------------------------------------------------------------------------------------------------------------------------------------------------------------------------------------------------------------------------------------------------------------------------------------------------------------------------------------------------------------------------------------------------------------------------------------------------------------------------------------------------------------------------------------------------------------------------------------------------------------------------------------------------------------------------------------------------------------------------------------------------------------------------------------------------------------------------------------------------------------------------------------------------------------------------------------------------------------------------------------------------------------------------------------------------------------------------------------------------------------------------|---------------------------------------------------------------------------------------------------------------------------------------------------------------------------------------------------------------------------------------------------------------------------------------------------------------------------------------------------------------------------------------------------------------------------------------------------------------------------------------------------------------------------------------------------------------------------------------------------------------------------------------------------------------------------------------------------------------------------------------------------------------------------------------------------------------------------------------------------------------------------------------------------------------------------------------------------------------------------------------------------------------------------------------------------------------------------------------------------------------------------------------------------------------------------------------------------------------------------------------------------------------------------------------------------------------------------------------------------------------------------------------------------------------------------------------------------------------------------------------------------------------------------------------------------------------------------------------------------------------------------------------------------------------------------------------------------------------------------------------------------------------------------------------------------------------------------------------------------------------------------------------------------------------------------------------------------------------|
| Question               | What is the primary treatment for localized rash on the torso associated with immune checkpoint inhibitors?                                                                                                                                                                                                                                                                                                                                                                                                                                                                                                                                                                                                                                                                                                                                                                                                                                                                                                                                                                                                                                                                                                                                                                                                                                                                                                                                                                                                                                           | When should systemic steroids be considered for immune checkpoint inhibitor associated dermatitis?                                                                                                                                                                                                                                                                                                                                                                                                                                                                                                                                                                                                                                                                                                                                                                                                                                                                                                                                                                                                                                                                                                                                                                                                                                                                                                                                                                                                                                                                                                                                                                                                                                                                                                                                                                   | What are life-threatening immune checkpoint inhibitor skin conditions?                                                                                                                                                                                                                                                                                                                                                                                                                                                                                                                                                                                                                                                                                                                                                                                                                                                                                                                                                                                                                                                                                                                                                                                                                                                                                                                                                                                                                                                                                                                                                                                                                                                                                             | Are there situations where immune checkpoint inhibitors can be continued even if dermatitis is suspected?                                                                                                                                                                                                                                                                                                                                                                                                                                                                                                                                                                                                                                                                                                                                                                                                                                                                                                                                                                                                                                                                                                                                                                                                                                                                                                                                                                                                                                                                                                                                                                                                                                                                                        | What are treatments for patients who have pruritis without rash from immune checkpoint inhibitors?                                                                                                                                                                                                                                                                                                                                                                                                                                                                                                                                                                                                                                                                                                                                                                                                                                                                                                                                                                                                                                                                                                                                                                                                                                                                                                                                                                                                                                                                                                                                                                                                                                                                                                                                                                                                                                                            |
| Answer Engine 2 (Bard) | <p>The primary treatment for localized rash on the torso associated with immune checkpoint inhibitors (ICIs) is <b>topical corticosteroids</b>. Topical corticosteroids are creams or ointments that are applied to the skin to reduce inflammation and itching.</p> <p>The strength of the topical corticosteroid that is prescribed will depend on the severity of the rash. For mild rashes, over-the-counter topical corticosteroids may be sufficient. For more severe rashes, prescription-strength topical corticosteroids may be needed.</p> <p>Other treatments that may be used for localized rash on the torso associated with ICIs include:</p> <p><b>Calamine lotion:</b> Calamine lotion can help to relieve itching and burning.</p> <p><b>Cool compresses:</b> Cool compresses can also help to relieve itching and burning.</p> <p><b>Oral antihistamines:</b> Oral antihistamines, such as diphenhydramine (Benadryl), can be used to reduce itching.</p> <p><b>Oatmeal baths:</b> Oatmeal baths can help to soothe the skin and reduce inflammation.</p> <p>If the rash is severe or does not respond to topical treatments, the doctor may prescribe systemic corticosteroids or other immunosuppressive drugs.</p> <p>It is important to note that ICIs can cause a variety of skin rashes, including some that can be serious. If you develop any type of rash while taking ICIs, it is important to see your doctor right away.</p> <p>Here are some tips for managing a localized rash on the torso associated with ICIs:</p> | <p>Systemic corticosteroids should be considered for immune checkpoint inhibitor-associated dermatitis (ICI-dermatitis) in the following situations:</p> <p><b>Grade 3 or 4 rash:</b> Grade 3 rash is characterized by severe inflammation, such as blistering or ulceration, and/or significant impairment of daily activities. Grade 4 rash is characterized by life-threatening or debilitating rash.</p> <p><b>Rash that does not respond to topical treatments:</b> If a rash does not respond to topical corticosteroids and other topical treatments, such as calamine lotion or oatmeal baths, systemic corticosteroids may be considered.</p> <p><b>Rash that is associated with other immune-related adverse events (irAEs):</b> If a rash is associated with other irAEs, such as colitis, hepatitis, or pneumonitis, systemic corticosteroids may be considered.</p> <p><b>Rash in patients with a poor prognosis:</b> Patients with a poor prognosis for their cancer may be more likely to benefit from systemic corticosteroids, even if their rash is not severe.</p> <p>In addition to the above, systemic corticosteroids may also be considered for ICI-dermatitis in the following situations:</p> <p><b>Rash that is causing significant distress to the patient:</b> Even if a rash is not severe, it may be considered for treatment with systemic corticosteroids if it is causing significant distress to the patient. This may be due to the rash being cosmetically unacceptable, causing pain or discomfort, or interfering with the patient's ability to perform daily activities.</p> <p><b>Rash that is located in a sensitive area, such as the face or genitals:</b> Systemic corticosteroids may be considered for a rash that is located in a sensitive area, even if it is not severe. This is because rashes in these areas</p> | <p>Life-threatening immune checkpoint inhibitor (ICI) skin conditions include:</p> <p><b>Stevens-Johnson syndrome (SJS):</b> SJS is a rare, serious skin condition that causes the top layer of skin to blister, peel, and erode. It can also affect the lining of the mouth, eyes, and genitals. SJS is thought to be caused by an overactive immune response to a medication, infection, or other trigger.</p> <p><b>Toxic epidermal necrolysis (TEN):</b> TEN is a more severe form of SJS that affects more than 30% of the body's surface area. It is a medical emergency and requires immediate hospitalization.</p> <p><b>Drug reaction with eosinophilia and systemic symptoms (DRESS):</b> DRESS is a rare but serious drug reaction that can cause a variety of symptoms, including rash, fever, swollen lymph nodes, and internal organ involvement. It is thought to be caused by an overactive immune response to a medication.</p> <p>Other ICI skin conditions that can be life-threatening if not treated promptly include:</p> <p><b>Bullous pemphigoid:</b> A rare autoimmune disease that causes large, fluid-filled blisters to form on the skin.</p> <p><b>Sweet's syndrome:</b> A rare inflammatory skin condition that causes painful, red nodules to form on the skin.</p> <p><b>Vasculitis:</b> A group of diseases that cause inflammation of the blood vessels.</p> <p><b>Cutaneous lupus erythematosus:</b> A severe form of lupus that can cause a variety of skin problems, including blisters, ulcers, and scarring.</p> <p>If you develop any of the skin conditions listed above while taking ICIs, it is important to see your doctor right away. Prompt treatment can help to prevent serious complications and even death.</p> | <p>Yes, there are situations where immune checkpoint inhibitors (ICIs) can be continued even if dermatitis is suspected. These situations include:</p> <p><b>Mild dermatitis:</b> If the dermatitis is mild, with symptoms such as dry skin, itching, and redness, and there are no signs of severe inflammation or blistering, the doctor may recommend continuing ICIs with close monitoring.</p> <p><b>Dermatitis that is responding to treatment:</b> If the dermatitis is responding to topical treatments, such as corticosteroids or calcineurin inhibitors, and there are no signs of systemic involvement, the doctor may recommend continuing ICIs.</p> <p><b>Dermatitis in patients with a good prognosis:</b> Patients with a good prognosis for their cancer, such as those with early-stage disease, may be more likely to benefit from continuing ICIs, even if they have dermatitis.</p> <p><b>Dermatitis in patients with few other treatment options:</b> Patients with few other treatment options, such as those with advanced cancer or cancer that has not responded to other treatments, may also be more likely to benefit from continuing ICIs, even if they have dermatitis.</p> <p>The decision of whether or not to continue ICIs in a patient with suspected dermatitis should be made on a case-by-case basis, considering the patient's individual risks and benefits. The doctor will weigh the potential benefits of continuing ICIs, such as improved cancer outcomes, against the potential risks of exacerbating the dermatitis or developing other immune-related adverse events (irAEs).</p> <p>Here are some factors that the doctor may consider when making the decision of whether or not to continue ICIs in a patient with suspected dermatitis:</p> | <p>The treatment for pruritis without rash from immune checkpoint inhibitors (ICIs) depends on the severity of the itching. For mild itching, the following treatments may be helpful:</p> <p><b>Emollients:</b> Emollients are moisturizers that can help to soothe dry, itchy skin.</p> <p><b>Oatmeal baths:</b> Oatmeal baths can also help to soothe itchy skin and reduce inflammation.</p> <p><b>Antihistamines:</b> Antihistamines can be taken orally to help reduce itching.</p> <p><b>Topical anesthetics:</b> Topical anesthetics, such as pramoxine, can be applied to the skin to numb the area and relieve itching.</p> <p><b>Cooling agents:</b> Cooling agents, such as menthol or calamine, can also help to relieve itching.</p> <p>If the itching is more severe, the doctor may prescribe systemic medications, such as corticosteroids or other immunosuppressive drugs.</p> <p>It is important to note that there is no one-size-fits-all treatment for pruritis without rash from ICIs. The best treatment for each patient will vary depending on the severity of the itching and their other medical conditions.</p> <p>Here are some additional tips for managing pruritis without rash from ICIs:</p> <ul style="list-style-type: none"> <li>Avoid scratching the itchy area, as this can damage the skin and make the itching worse.</li> <li>Keep the skin cool and moist.</li> <li>Wear loose-fitting, comfortable clothing.</li> <li>Avoid sweating, as this can aggravate the itching.</li> <li>Take a cool shower or bath.</li> <li>Use a humidifier to add moisture to the air.</li> <li>Avoid caffeine and alcohol, as these can dehydrate the skin and make the itching worse.</li> <li>Get enough sleep.</li> <li>Manage stress, as stress can worsen itching.</li> </ul> <p>If you have any questions or concerns about the treatment or management of pruritis without rash from ICIs, please talk to your doctor.</p> |

|  |                                                                                                                                                                                                                                                                                                                                                                                                                                                                                                                                                                                                                                                                                                                                           |                                                                                                                                                                                                                                                                                                                                                                                                                                                                                                                                                                                                                                                                                                                                                                                                                                                                                                                                                                                          |                                                                                                                                                                                                                                                                                                                                                                                                                                                                                                                                                                               |                                                                                                                                                                                                                                                                                                                                                                                                                                                                                                                                                                                                |  |
|--|-------------------------------------------------------------------------------------------------------------------------------------------------------------------------------------------------------------------------------------------------------------------------------------------------------------------------------------------------------------------------------------------------------------------------------------------------------------------------------------------------------------------------------------------------------------------------------------------------------------------------------------------------------------------------------------------------------------------------------------------|------------------------------------------------------------------------------------------------------------------------------------------------------------------------------------------------------------------------------------------------------------------------------------------------------------------------------------------------------------------------------------------------------------------------------------------------------------------------------------------------------------------------------------------------------------------------------------------------------------------------------------------------------------------------------------------------------------------------------------------------------------------------------------------------------------------------------------------------------------------------------------------------------------------------------------------------------------------------------------------|-------------------------------------------------------------------------------------------------------------------------------------------------------------------------------------------------------------------------------------------------------------------------------------------------------------------------------------------------------------------------------------------------------------------------------------------------------------------------------------------------------------------------------------------------------------------------------|------------------------------------------------------------------------------------------------------------------------------------------------------------------------------------------------------------------------------------------------------------------------------------------------------------------------------------------------------------------------------------------------------------------------------------------------------------------------------------------------------------------------------------------------------------------------------------------------|--|
|  | <p>* Keep the rash clean and dry.</p> <p>* Avoid scratching the rash, as this can damage the skin and make the rash worse.</p> <p>* Apply a cool compress to the rash for 10-15 minutes at a time to relieve itching and burning.</p> <p>* Take an oatmeal bath to soothe the skin and reduce inflammation.</p> <p>* Apply a topical corticosteroid to the rash as directed by your doctor.</p> <p>* Avoid using harsh soaps or detergents on the rash.</p> <p>* Wear loose-fitting, comfortable clothing.</p> <p>* Avoid sweating, as this can aggravate the rash.</p> <p>If you have any questions or concerns about the treatment or management of a localized rash on the torso associated with ICIs, please talk to your doctor.</p> | <p>can be more difficult to manage and can cause more discomfort.</p> <p>* **Rash that is accompanied by other symptoms, such as fever or malaise:** If a rash is accompanied by other symptoms, such as fever or malaise, it may be a sign of a more serious condition. Systemic corticosteroids may be considered in these cases to help control the inflammation and other symptoms.</p> <p>The decision of whether or not to prescribe systemic corticosteroids for ICI-dermatitis should be made on a case-by-case basis, considering the patient's individual risks and benefits. The doctor will weigh the potential benefits of systemic corticosteroids, such as rapid and effective relief of symptoms, against the potential risks, such as increased risk of infection, suppression of the immune system, and other side effects.</p> <p>If you have any questions or concerns about the use of systemic corticosteroids for ICI-dermatitis, please talk to your doctor.</p> | <p>Here are some signs and symptoms of life-threatening ICI skin conditions:</p> <p>* **Rash that is painful, blistering, or ulcerating**</p> <p>* **Rash that covers a large area of the body**</p> <p>* **Rash that is accompanied by fever, chills, or other systemic symptoms**</p> <p>* **Difficulty breathing**</p> <p>* **Swelling of the face, lips, or tongue**</p> <p>* **Difficulty swallowing**</p> <p>* **Vision changes**</p> <p>If you experience any of these signs or symptoms while taking ICIs, it is important to seek medical attention immediately.</p> | <p>* The severity of the dermatitis</p> <p>* The patient's response to treatment for the dermatitis</p> <p>* The patient's prognosis for their cancer</p> <p>* The patient's other treatment options</p> <p>* The patient's preferences</p> <p>It is important to note that there is no right or wrong answer to this question. The best decision for each patient will vary depending on their individual circumstances.</p> <p>If you have any questions or concerns about the decision of whether or not to continue ICIs if you have suspected dermatitis, please talk to your doctor.</p> |  |
|--|-------------------------------------------------------------------------------------------------------------------------------------------------------------------------------------------------------------------------------------------------------------------------------------------------------------------------------------------------------------------------------------------------------------------------------------------------------------------------------------------------------------------------------------------------------------------------------------------------------------------------------------------------------------------------------------------------------------------------------------------|------------------------------------------------------------------------------------------------------------------------------------------------------------------------------------------------------------------------------------------------------------------------------------------------------------------------------------------------------------------------------------------------------------------------------------------------------------------------------------------------------------------------------------------------------------------------------------------------------------------------------------------------------------------------------------------------------------------------------------------------------------------------------------------------------------------------------------------------------------------------------------------------------------------------------------------------------------------------------------------|-------------------------------------------------------------------------------------------------------------------------------------------------------------------------------------------------------------------------------------------------------------------------------------------------------------------------------------------------------------------------------------------------------------------------------------------------------------------------------------------------------------------------------------------------------------------------------|------------------------------------------------------------------------------------------------------------------------------------------------------------------------------------------------------------------------------------------------------------------------------------------------------------------------------------------------------------------------------------------------------------------------------------------------------------------------------------------------------------------------------------------------------------------------------------------------|--|



|                        | Thyroid Toxicity                                                                                                                                                                                                                                                                                                                                                                                                                                                                                                                                                                                                                                                                                                                                                                                                                                                                                                                                                                                                                                                                                                                                                                                                                                                                                                                                                                                                                                                                                                                                                                                      | Thyroid Toxicity                                                                                                                                                                                                                                                                                                                                                                                                                                                                                                                                                                                                                                                                                                                                                                                                                                                                                                                                                                                                                                                                                                                                                                                                                                                                                                                                                                                                                                                                                                                                                                                                                                                                                                                                                              | Thyroid Toxicity                                                                                                                                                                                                                                                                                                                                                                                                                                                                                                                                                                                                                                                                                                                                                                                                                                                                                                                                                                                                                                                                                                                                                                                                                                                                                                                                                                                                                                                                                                                                                                                                                                                                                     | Thyroid Toxicity                                                                                                                                                                                                                                                                                                                                                                                                                                                                                                                                                                                                                                                                                                                                                                                                                                                                                                                                                                                                                                                                                                                                                                                                                                                                                                                                                                                                                                                                                                                                                                                                                                                                                                          | Thyroid Toxicity                                                                                                                                                                                                                                                                                                                                                                                                                                                                                                                                                                                                                                                                                                                                                                                                                                                                                                                                                                                                                                                                                                                                                                                                                                                                                                                                                                                                                                                                                                                                                                                                                                                                                                                                                                                                                                                                                                                             |
|------------------------|-------------------------------------------------------------------------------------------------------------------------------------------------------------------------------------------------------------------------------------------------------------------------------------------------------------------------------------------------------------------------------------------------------------------------------------------------------------------------------------------------------------------------------------------------------------------------------------------------------------------------------------------------------------------------------------------------------------------------------------------------------------------------------------------------------------------------------------------------------------------------------------------------------------------------------------------------------------------------------------------------------------------------------------------------------------------------------------------------------------------------------------------------------------------------------------------------------------------------------------------------------------------------------------------------------------------------------------------------------------------------------------------------------------------------------------------------------------------------------------------------------------------------------------------------------------------------------------------------------|-------------------------------------------------------------------------------------------------------------------------------------------------------------------------------------------------------------------------------------------------------------------------------------------------------------------------------------------------------------------------------------------------------------------------------------------------------------------------------------------------------------------------------------------------------------------------------------------------------------------------------------------------------------------------------------------------------------------------------------------------------------------------------------------------------------------------------------------------------------------------------------------------------------------------------------------------------------------------------------------------------------------------------------------------------------------------------------------------------------------------------------------------------------------------------------------------------------------------------------------------------------------------------------------------------------------------------------------------------------------------------------------------------------------------------------------------------------------------------------------------------------------------------------------------------------------------------------------------------------------------------------------------------------------------------------------------------------------------------------------------------------------------------|------------------------------------------------------------------------------------------------------------------------------------------------------------------------------------------------------------------------------------------------------------------------------------------------------------------------------------------------------------------------------------------------------------------------------------------------------------------------------------------------------------------------------------------------------------------------------------------------------------------------------------------------------------------------------------------------------------------------------------------------------------------------------------------------------------------------------------------------------------------------------------------------------------------------------------------------------------------------------------------------------------------------------------------------------------------------------------------------------------------------------------------------------------------------------------------------------------------------------------------------------------------------------------------------------------------------------------------------------------------------------------------------------------------------------------------------------------------------------------------------------------------------------------------------------------------------------------------------------------------------------------------------------------------------------------------------------|---------------------------------------------------------------------------------------------------------------------------------------------------------------------------------------------------------------------------------------------------------------------------------------------------------------------------------------------------------------------------------------------------------------------------------------------------------------------------------------------------------------------------------------------------------------------------------------------------------------------------------------------------------------------------------------------------------------------------------------------------------------------------------------------------------------------------------------------------------------------------------------------------------------------------------------------------------------------------------------------------------------------------------------------------------------------------------------------------------------------------------------------------------------------------------------------------------------------------------------------------------------------------------------------------------------------------------------------------------------------------------------------------------------------------------------------------------------------------------------------------------------------------------------------------------------------------------------------------------------------------------------------------------------------------------------------------------------------------|----------------------------------------------------------------------------------------------------------------------------------------------------------------------------------------------------------------------------------------------------------------------------------------------------------------------------------------------------------------------------------------------------------------------------------------------------------------------------------------------------------------------------------------------------------------------------------------------------------------------------------------------------------------------------------------------------------------------------------------------------------------------------------------------------------------------------------------------------------------------------------------------------------------------------------------------------------------------------------------------------------------------------------------------------------------------------------------------------------------------------------------------------------------------------------------------------------------------------------------------------------------------------------------------------------------------------------------------------------------------------------------------------------------------------------------------------------------------------------------------------------------------------------------------------------------------------------------------------------------------------------------------------------------------------------------------------------------------------------------------------------------------------------------------------------------------------------------------------------------------------------------------------------------------------------------------|
| Question               | What is the primary treatment for thyroiditis associated with immune checkpoint inhibitors?                                                                                                                                                                                                                                                                                                                                                                                                                                                                                                                                                                                                                                                                                                                                                                                                                                                                                                                                                                                                                                                                                                                                                                                                                                                                                                                                                                                                                                                                                                           | What is the primary treatment for hypothyroidism associated with immune checkpoint inhibitors?                                                                                                                                                                                                                                                                                                                                                                                                                                                                                                                                                                                                                                                                                                                                                                                                                                                                                                                                                                                                                                                                                                                                                                                                                                                                                                                                                                                                                                                                                                                                                                                                                                                                                | Should immune checkpoint inhibitors be discontinued for hypothyroidism?                                                                                                                                                                                                                                                                                                                                                                                                                                                                                                                                                                                                                                                                                                                                                                                                                                                                                                                                                                                                                                                                                                                                                                                                                                                                                                                                                                                                                                                                                                                                                                                                                              | When should thyroid hormone therapy be initiated for immune checkpoint inhibitor associated hypothyroid and at what dose?                                                                                                                                                                                                                                                                                                                                                                                                                                                                                                                                                                                                                                                                                                                                                                                                                                                                                                                                                                                                                                                                                                                                                                                                                                                                                                                                                                                                                                                                                                                                                                                                 | How often should thyroid laboratory assessment be performed in patients receiving immune checkpoint inhibitors?                                                                                                                                                                                                                                                                                                                                                                                                                                                                                                                                                                                                                                                                                                                                                                                                                                                                                                                                                                                                                                                                                                                                                                                                                                                                                                                                                                                                                                                                                                                                                                                                                                                                                                                                                                                                                              |
| Answer Engine 2 (Bard) | <p>The primary treatment for thyroiditis associated with immune checkpoint inhibitors (ICIs) is <b>levothyroxine</b>, a synthetic thyroid hormone. Levothyroxine is used to replace the thyroid hormone that the body is no longer producing due to the ICI-induced thyroiditis.</p> <p>The dose of levothyroxine that is needed will vary depending on the individual patient's needs. The doctor will start the patient on a low dose of levothyroxine and increase the dose gradually until the patient's thyroid hormone levels are normalized.</p> <p>In addition to levothyroxine, the doctor may also prescribe other medications to help manage the symptoms of ICI-induced thyroiditis, such as:</p> <ul style="list-style-type: none"> <li><b>Beta-blockers:</b> Beta-blockers can help to reduce symptoms such as anxiety, palpitations, and tremors.</li> <li><b>Anti-inflammatory medications:</b> Anti-inflammatory medications, such as corticosteroids, can help to reduce inflammation and swelling.</li> <li><b>Pain relievers:</b> Pain relievers, such as acetaminophen or ibuprofen, can be used to relieve pain and discomfort.</li> </ul> <p>In some cases, the doctor may also recommend that the patient stop taking the ICI that is causing the thyroiditis. However, this decision should be made on a case-by-case basis, weighing the potential benefits of continuing the ICI against the risks of worsening thyroiditis or developing other immune-related adverse events (irAEs).</p> <p>If you have any questions or concerns about the treatment of thyroiditis</p> | <p>The primary treatment for hypothyroidism associated with immune checkpoint inhibitors (ICIs) is <b>levothyroxine</b>, a synthetic thyroid hormone. Levothyroxine is used to replace the thyroid hormone that the body is no longer producing due to the ICI-induced hypothyroidism.</p> <p>The dose of levothyroxine that is needed will vary depending on the individual patient's needs. The doctor will start the patient on a low dose of levothyroxine and increase the dose gradually until the patient's thyroid hormone levels are normalized.</p> <p>In most cases, patients with ICI-induced hypothyroidism will need to take levothyroxine for the rest of their lives. However, in some cases, the hypothyroidism may resolve once the patient discontinues the ICI.</p> <p>If you have any questions or concerns about the treatment of hypothyroidism associated with ICIs, please talk to your doctor.</p> <p><b>Here are some additional tips for managing hypothyroidism associated with ICIs:</b></p> <ul style="list-style-type: none"> <li>Get regular blood tests to monitor your thyroid hormone levels.</li> <li>Take your levothyroxine medication on an empty stomach, at least 30 minutes before eating or drinking anything other than water.</li> <li>Avoid taking other medications, such as calcium or iron supplements, at the same time as levothyroxine, as these can interfere with its absorption.</li> <li>Be aware of the symptoms of hypothyroidism, such as fatigue, weight gain, cold intolerance, constipation, and dry skin. If you experience any of these symptoms, talk to your doctor.</li> <li>Make sure to get enough sleep and exercise regularly.</li> <li>Eat a healthy diet that includes plenty of fruits,</li> </ul> | <p>Whether or not to discontinue immune checkpoint inhibitors (ICIs) for hypothyroidism is a decision that should be made on a case-by-case basis, depending on the individual patient's circumstances.</p> <p>In general, ICI-induced hypothyroidism is mild and can be managed with levothyroxine replacement therapy. Therefore, ICIs do not need to be discontinued in most cases of hypothyroidism.</p> <p>However, there are some situations where ICI discontinuation may be considered for hypothyroidism:</p> <ul style="list-style-type: none"> <li>Severe hypothyroidism that does not respond to levothyroxine replacement therapy</li> <li>Hypothyroidism that is accompanied by other immune-related adverse events (irAEs), such as colitis, hepatitis, or pneumonitis</li> <li>Hypothyroidism in patients with a poor prognosis for their cancer</li> </ul> <p>The decision of whether or not to discontinue ICIs for hypothyroidism should be made in consultation with the patient's oncologist and endocrinologist. The risks and benefits of continuing ICIs should be weighed against the risks and benefits of discontinuing ICIs and managing hypothyroidism with levothyroxine replacement therapy.</p> <p>Here are some factors that the doctor may consider when making the decision of whether or not to discontinue ICIs for hypothyroidism:</p> <ul style="list-style-type: none"> <li>The severity of the hypothyroidism</li> <li>The patient's response to levothyroxine replacement therapy</li> <li>The presence of other irAEs</li> <li>The patient's prognosis for their cancer</li> <li>The patient's preferences</li> </ul> <p>If you have any questions or</p> | <p>Thyroid hormone therapy should be initiated for immune checkpoint inhibitor (ICI)-associated hypothyroidism as soon as the patient's thyroid hormone levels fall below the reference range. The initial dose of thyroid hormone therapy should be weight-based, with a starting dose of 1.45 mcg/kg/day of levothyroxine.</p> <p>The dose of thyroid hormone therapy will need to be adjusted gradually until the patient's thyroid hormone levels are normalized. This may take several weeks or even months.</p> <p>The patient's thyroid hormone levels should be monitored regularly, at least every 4-6 weeks, to ensure that the dose of thyroid hormone therapy is adequate. The doctor may also adjust the dose of thyroid hormone therapy based on the patient's clinical symptoms, such as fatigue, weight gain, and cold intolerance.</p> <p>Once the patient's thyroid hormone levels are normalized, thyroid hormone therapy should be continued indefinitely in most cases of ICI-associated hypothyroidism.</p> <p>Here are some additional things to keep in mind about thyroid hormone therapy for ICI-associated hypothyroidism:</p> <ul style="list-style-type: none"> <li>Thyroid hormone therapy should be taken on an empty stomach, at least 30 minutes before eating or drinking anything other than water.</li> <li>Other medications, such as calcium or iron supplements, can interfere with the absorption of thyroid hormone, so they should not be taken at the same time as thyroid hormone.</li> <li>Patients with ICI-associated hypothyroidism may be more sensitive to the effects of thyroid hormone, so it is important to start with a low dose and increase the dose</li> </ul> | <p>The frequency of thyroid laboratory assessment in patients receiving immune checkpoint inhibitors (ICIs) varies depending on the patient's individual risk factors and the type of ICI being used. However, most guidelines recommend that thyroid function tests (TFTs) be performed at baseline and then every 6-8 weeks during ICI therapy.</p> <p>Patients with a higher risk of ICI-related thyroid dysfunction may need to have their TFTs checked more frequently. These patients include patients with:</p> <ul style="list-style-type: none"> <li>A history of thyroid disease</li> <li>Autoimmune diseases, such as type 1 diabetes or rheumatoid arthritis</li> <li>Use of certain medications, such as lithium or amiodarone</li> </ul> <p>The type of ICI being used may also affect the frequency of thyroid monitoring. For example, ICIs that block the PD-1/PD-L1 pathway, such as pembrolizumab and nivolumab, are more likely to cause thyroid dysfunction than ICIs that block the CTLA-4 pathway, such as ipilimumab.</p> <p>If the patient develops any symptoms of thyroid dysfunction, such as fatigue, weight gain, cold intolerance, or constipation, their TFTs should be checked immediately.</p> <p>Here is a summary of the recommendations for thyroid laboratory assessment in patients receiving ICIs:</p> <ul style="list-style-type: none"> <li>Baseline TFTs</li> <li>TFTs every 6-8 weeks during ICI therapy</li> <li>More frequent TFTs for patients at high risk</li> <li>Immediate TFTs if symptoms of thyroid dysfunction develop</li> </ul> <p>It is important to note that these are just general guidelines. The specific frequency of thyroid monitoring should be determined by the patient's oncologist in consultation with their endocrinologist.</p> <p>If you have any questions or concerns about thyroid laboratory assessment while receiving ICIs, please talk to your doctor.</p> |

|  |                                                                                                                                                                                                                                                                                                                                                                                                                                                                                                                                                                                                                                                                                            |                                                                                                                                                                            |                                                                                                          |                                                                                                                                                                                                                                                             |  |
|--|--------------------------------------------------------------------------------------------------------------------------------------------------------------------------------------------------------------------------------------------------------------------------------------------------------------------------------------------------------------------------------------------------------------------------------------------------------------------------------------------------------------------------------------------------------------------------------------------------------------------------------------------------------------------------------------------|----------------------------------------------------------------------------------------------------------------------------------------------------------------------------|----------------------------------------------------------------------------------------------------------|-------------------------------------------------------------------------------------------------------------------------------------------------------------------------------------------------------------------------------------------------------------|--|
|  | <p>associated with ICIs, please talk to your doctor.</p> <p><b>**Here are some additional tips for managing thyroiditis associated with ICIs:**</b></p> <ul style="list-style-type: none"><li>* Get regular blood tests to monitor your thyroid hormone levels.</li><li>* Take your levothyroxine medication on an empty stomach, at least 30 minutes before eating or drinking anything other than water.</li><li>* Avoid taking other medications, such as calcium or iron supplements, at the same time as levothyroxine, as these can interfere with its absorption.</li><li>* If you have any questions or concerns about taking levothyroxine, please talk to your doctor.</li></ul> | <p>vegetables, and whole grains.</p> <p>If you have any questions or concerns about the management of hypothyroidism associated with ICIs, please talk to your doctor.</p> | <p>concerns about whether or not to discontinue ICIs for hypothyroidism, please talk to your doctor.</p> | <p>gradually.</p> <p>* Patients should monitor their symptoms closely and report any changes to their doctor.</p> <p>If you have any questions or concerns about thyroid hormone therapy for ICI-associated hypothyroidism, please talk to your doctor.</p> |  |
|--|--------------------------------------------------------------------------------------------------------------------------------------------------------------------------------------------------------------------------------------------------------------------------------------------------------------------------------------------------------------------------------------------------------------------------------------------------------------------------------------------------------------------------------------------------------------------------------------------------------------------------------------------------------------------------------------------|----------------------------------------------------------------------------------------------------------------------------------------------------------------------------|----------------------------------------------------------------------------------------------------------|-------------------------------------------------------------------------------------------------------------------------------------------------------------------------------------------------------------------------------------------------------------|--|

|                        | Pituitary/Adrenal Toxicity                                                                                                                                                                                                                                                                                                                                                                                                                                                                                                                                                                                                                                                                                                                                                                                                                                                                                                                                                                                                                                                                                                                                                                                                                                                                                                                                                                                                                                                                                                                                                                                                             | Pituitary/Adrenal Toxicity                                                                                                                                                                                                                                                                                                                                                                                                                                                                                                                                                                                                                                                                                                                                                                                                                                                                                                                                                                                                                                                                                                                                                                                                                                                                                                                                                                                                                                                                                                                                                                                                                                                                                                                                                                                                   | Pituitary/Adrenal Toxicity                                                                                                                                                                                                                                                                                                                                                                                                                                                                                                                                                                                                                                                                                                                                                                                                                                                                                                                                                                                                                                                                                                                                                                                                                                                                                                                                                                                                                                                                                                                                                                                                                                                                                                        | Pituitary/Adrenal Toxicity                                                                                                                                                                                                                                                                                                                                                                                                                                                                                                                                                                                                                                                                                                                                                                                                                                                                                                                                                                                                                                                                                                                                                                                                                                                                                                                                                                                                                                                                                                                                                                                                                                                           | Pituitary/Adrenal Toxicity                                                                                                                                                                                                                                                                                                                                                                                                                                                                                                                                                                                                                                                                                                                                                                                                                                                                                                                                                                                                                                                                                                                                                                                                                                                                                                                                                                                                                                                                                                                                                                                                                                                                                                                                                                                                                                             |
|------------------------|----------------------------------------------------------------------------------------------------------------------------------------------------------------------------------------------------------------------------------------------------------------------------------------------------------------------------------------------------------------------------------------------------------------------------------------------------------------------------------------------------------------------------------------------------------------------------------------------------------------------------------------------------------------------------------------------------------------------------------------------------------------------------------------------------------------------------------------------------------------------------------------------------------------------------------------------------------------------------------------------------------------------------------------------------------------------------------------------------------------------------------------------------------------------------------------------------------------------------------------------------------------------------------------------------------------------------------------------------------------------------------------------------------------------------------------------------------------------------------------------------------------------------------------------------------------------------------------------------------------------------------------|------------------------------------------------------------------------------------------------------------------------------------------------------------------------------------------------------------------------------------------------------------------------------------------------------------------------------------------------------------------------------------------------------------------------------------------------------------------------------------------------------------------------------------------------------------------------------------------------------------------------------------------------------------------------------------------------------------------------------------------------------------------------------------------------------------------------------------------------------------------------------------------------------------------------------------------------------------------------------------------------------------------------------------------------------------------------------------------------------------------------------------------------------------------------------------------------------------------------------------------------------------------------------------------------------------------------------------------------------------------------------------------------------------------------------------------------------------------------------------------------------------------------------------------------------------------------------------------------------------------------------------------------------------------------------------------------------------------------------------------------------------------------------------------------------------------------------|-----------------------------------------------------------------------------------------------------------------------------------------------------------------------------------------------------------------------------------------------------------------------------------------------------------------------------------------------------------------------------------------------------------------------------------------------------------------------------------------------------------------------------------------------------------------------------------------------------------------------------------------------------------------------------------------------------------------------------------------------------------------------------------------------------------------------------------------------------------------------------------------------------------------------------------------------------------------------------------------------------------------------------------------------------------------------------------------------------------------------------------------------------------------------------------------------------------------------------------------------------------------------------------------------------------------------------------------------------------------------------------------------------------------------------------------------------------------------------------------------------------------------------------------------------------------------------------------------------------------------------------------------------------------------------------------------------------------------------------|--------------------------------------------------------------------------------------------------------------------------------------------------------------------------------------------------------------------------------------------------------------------------------------------------------------------------------------------------------------------------------------------------------------------------------------------------------------------------------------------------------------------------------------------------------------------------------------------------------------------------------------------------------------------------------------------------------------------------------------------------------------------------------------------------------------------------------------------------------------------------------------------------------------------------------------------------------------------------------------------------------------------------------------------------------------------------------------------------------------------------------------------------------------------------------------------------------------------------------------------------------------------------------------------------------------------------------------------------------------------------------------------------------------------------------------------------------------------------------------------------------------------------------------------------------------------------------------------------------------------------------------------------------------------------------------|------------------------------------------------------------------------------------------------------------------------------------------------------------------------------------------------------------------------------------------------------------------------------------------------------------------------------------------------------------------------------------------------------------------------------------------------------------------------------------------------------------------------------------------------------------------------------------------------------------------------------------------------------------------------------------------------------------------------------------------------------------------------------------------------------------------------------------------------------------------------------------------------------------------------------------------------------------------------------------------------------------------------------------------------------------------------------------------------------------------------------------------------------------------------------------------------------------------------------------------------------------------------------------------------------------------------------------------------------------------------------------------------------------------------------------------------------------------------------------------------------------------------------------------------------------------------------------------------------------------------------------------------------------------------------------------------------------------------------------------------------------------------------------------------------------------------------------------------------------------------|
| Question               | What are symptoms concerning for immune checkpoint inhibitor associated hypophysitis or hypopituitarism?                                                                                                                                                                                                                                                                                                                                                                                                                                                                                                                                                                                                                                                                                                                                                                                                                                                                                                                                                                                                                                                                                                                                                                                                                                                                                                                                                                                                                                                                                                                               | What are the main diagnostic tests to assess for immune checkpoint inhibitor associated hypophysitis?                                                                                                                                                                                                                                                                                                                                                                                                                                                                                                                                                                                                                                                                                                                                                                                                                                                                                                                                                                                                                                                                                                                                                                                                                                                                                                                                                                                                                                                                                                                                                                                                                                                                                                                        | Should immune checkpoint inhibitors be discontinued for hypopituitarism?                                                                                                                                                                                                                                                                                                                                                                                                                                                                                                                                                                                                                                                                                                                                                                                                                                                                                                                                                                                                                                                                                                                                                                                                                                                                                                                                                                                                                                                                                                                                                                                                                                                          | What is the primary treatment for hypophysitis associated with immune checkpoint inhibitors? Please list the dose of any medications                                                                                                                                                                                                                                                                                                                                                                                                                                                                                                                                                                                                                                                                                                                                                                                                                                                                                                                                                                                                                                                                                                                                                                                                                                                                                                                                                                                                                                                                                                                                                 | Can corticosteroid hormone replacement typically be discontinued in patients with immune checkpoint inhibitor associated hypophysitis?                                                                                                                                                                                                                                                                                                                                                                                                                                                                                                                                                                                                                                                                                                                                                                                                                                                                                                                                                                                                                                                                                                                                                                                                                                                                                                                                                                                                                                                                                                                                                                                                                                                                                                                                 |
| Answer Engine 2 (Bard) | <p>The following symptoms are concerning for immune checkpoint inhibitor (ICI)-associated hypophysitis or hypopituitarism:</p> <ul style="list-style-type: none"> <li>* Headache</li> <li>* Fatigue</li> <li>* Nausea and vomiting</li> <li>* Weakness</li> <li>* Dizziness</li> <li>* Confusion</li> <li>* Weight gain</li> <li>* Loss of appetite</li> <li>* Cold intolerance</li> <li>* Constipation</li> <li>* Dry skin</li> <li>* Decreased libido</li> <li>* Erectile dysfunction</li> <li>* Vision changes</li> </ul> <p>These symptoms can be caused by a variety of other conditions, so it is important to see a doctor to get a diagnosis. However, if you are experiencing any of these symptoms while taking ICIs, it is important to let your doctor know right away.</p> <p>Here is a more detailed description of some of the symptoms listed above:</p> <ul style="list-style-type: none"> <li>***Headache:** The headache associated with ICI-associated hypophysitis is often severe and persistent. It may be accompanied by other symptoms, such as nausea, vomiting, and vision changes.</li> <li>***Fatigue:** The fatigue associated with ICI-associated hypophysitis is often severe and debilitating. It may be difficult to get out of bed or perform everyday activities.</li> <li>***Nausea and vomiting:** The nausea and vomiting associated with ICI-associated hypophysitis can be severe and persistent. It may be accompanied by other symptoms, such as diarrhea and abdominal pain.</li> <li>***Weakness:** The weakness associated with ICI-associated hypophysitis can be severe and</li> </ul> | <p>The main diagnostic tests to assess for immune checkpoint inhibitor (ICI)-associated hypophysitis are:</p> <ul style="list-style-type: none"> <li>***Pituitary hormone levels:** This test measures the levels of pituitary hormones in the blood. A decrease in the levels of one or more pituitary hormones may indicate hypophysitis.</li> <li>***Pituitary MRI:** This test creates images of the pituitary gland. Pituitary MRI can show signs of inflammation, such as swelling of the pituitary gland and thickening of the pituitary stalk.</li> <li>***Glucagon stimulation test:** This test measures the body's response to glucagon, a hormone that stimulates the release of growth hormone from the pituitary gland. A failure to respond to glucagon stimulation may indicate growth hormone deficiency, which is a sign of hypophysitis.</li> <li>***Corticotropin-releasing hormone (CRH) stimulation test:** This test measures the body's response to CRH, a hormone that stimulates the release of adrenocorticotropic hormone (ACTH) from the pituitary gland. ACTH is a hormone that stimulates the adrenal glands to produce cortisol. A failure to respond to CRH stimulation may indicate ACTH deficiency, which is a sign of hypophysitis.</li> </ul> <p>The specific tests that are ordered will depend on the patient's individual symptoms and the doctor's suspicion of hypophysitis.</p> <p>In addition to the tests listed above, the doctor may also order other tests, such as blood tests to check for other causes of the patient's symptoms and imaging tests to check for other problems in the brain.</p> <p>If you are experiencing any symptoms of hypophysitis while taking ICIs, it is important to see a doctor right away. Early diagnosis and treatment of hypophysitis</p> | <p>Whether or not to discontinue immune checkpoint inhibitors (ICIs) for hypopituitarism is a decision that should be made on a case-by-case basis, depending on the individual patient's circumstances.</p> <p>In general, ICI-induced hypopituitarism is mild and can be managed with hormone replacement therapy. Therefore, ICIs do not need to be discontinued in most cases of hypopituitarism.</p> <p>However, there are some situations where ICI discontinuation may be considered for hypopituitarism:</p> <ul style="list-style-type: none"> <li>* Severe hypopituitarism that does not respond to hormone replacement therapy</li> <li>* Hypopituitarism that is accompanied by other immune-related adverse events (irAEs), such as colitis, hepatitis, or pneumonitis</li> <li>* Hypopituitarism in patients with a poor prognosis for their cancer</li> </ul> <p>The decision of whether or not to discontinue ICIs for hypopituitarism should be made in consultation with the patient's oncologist and endocrinologist. The risks and benefits of continuing ICIs should be weighed against the risks and benefits of discontinuing ICIs and managing hypopituitarism with hormone replacement therapy.</p> <p>Here are some factors that the doctor may consider when making the decision of whether or not to discontinue ICIs for hypopituitarism:</p> <ul style="list-style-type: none"> <li>* The severity of the hypopituitarism</li> <li>* The patient's response to hormone replacement therapy</li> <li>* The presence of other irAEs</li> <li>* The patient's prognosis for their cancer</li> <li>* The patient's preferences</li> </ul> <p>If you have any questions or concerns about whether or</p> | <p>The primary treatment for hypophysitis associated with immune checkpoint inhibitors (ICIs) is **glucocorticoid replacement therapy**. The most commonly used glucocorticoid for this purpose is prednisone. The dose of prednisone will vary depending on the severity of the hypophysitis. A typical starting dose is 20-40 mg per day. The dose may be tapered gradually once the inflammation is under control.</p> <p>In some cases, other medications may be used to treat ICI-associated hypophysitis, such as:</p> <ul style="list-style-type: none"> <li>***Growth hormone:** Growth hormone replacement therapy may be used to treat growth hormone deficiency in patients with ICI-associated hypophysitis. The typical dose of growth hormone is 0.2-0.4 mg per day.</li> <li>***Thyroid hormone:** Thyroid hormone replacement therapy may be used to treat thyroid hormone deficiency in patients with ICI-associated hypophysitis. The typical dose of levothyroxine, the synthetic thyroid hormone, is 1.45 mcg/kg/day.</li> <li>***Adrenal hormone:** Adrenal hormone replacement therapy may be used to treat adrenal hormone deficiency in patients with ICI-associated hypophysitis. The typical dose of hydrocortisone, the synthetic adrenal hormone, is 15-20 mg per day.</li> </ul> <p>It is important to note that these are just general guidelines. The specific medications and doses that are used to treat ICI-associated hypophysitis will vary depending on the individual patient's needs and the recommendations of their doctor.</p> <p>Here are some additional things to keep in mind about the treatment of ICI-associated hypophysitis:</p> | <p>No, corticosteroid hormone replacement typically cannot be discontinued in patients with immune checkpoint inhibitor (ICI)-associated hypophysitis. This is because ICI-associated hypophysitis is often permanent, meaning that the damage to the pituitary gland cannot be reversed.</p> <p>In some cases, patients may be able to taper off of corticosteroids gradually, but they will likely need to remain on some level of corticosteroid replacement therapy for the rest of their lives.</p> <p>If a patient is able to discontinue corticosteroids completely, they will need to be monitored closely for signs of adrenal insufficiency. Adrenal insufficiency is a condition in which the adrenal glands do not produce enough cortisol, a hormone that is essential for survival.</p> <p>Symptoms of adrenal insufficiency include fatigue, weakness, dizziness, lightheadedness, nausea, vomiting, and abdominal pain. If you experience any of these symptoms, it is important to see a doctor right away.</p> <p>If you have any questions or concerns about discontinuing corticosteroid hormone replacement for ICI-associated hypophysitis, please talk to your doctor.</p> <p>Here are some factors that may affect whether or not a patient can discontinue corticosteroid hormone replacement for ICI-associated hypophysitis:</p> <ul style="list-style-type: none"> <li>* The severity of the hypophysitis</li> <li>* The length of time the patient has been taking corticosteroids</li> <li>* The presence of other immune-related adverse events (irAEs)</li> <li>* The patient's response to corticosteroid replacement therapy</li> <li>* The patient's preferences</li> </ul> <p>It is important to discuss the risks and benefits of discontinuing corticosteroid replacement therapy with your doctor before making a decision.</p> |

|  |                                                                                                                                                                                                                                                                                                                                                                                                                                                                                                                                                                                                                                                                                                                                                                                                                                                                                                                                                                                                                                                                                                                                                                                                                                                                                                                                                                                                                                                                                                                                                                                                                                                                                                                                                                                                                                                                            |                                                   |                                                                                 |                                                                                                                                                                                                                                                                                                                                                                                                                                                                                                                                                                        |  |
|--|----------------------------------------------------------------------------------------------------------------------------------------------------------------------------------------------------------------------------------------------------------------------------------------------------------------------------------------------------------------------------------------------------------------------------------------------------------------------------------------------------------------------------------------------------------------------------------------------------------------------------------------------------------------------------------------------------------------------------------------------------------------------------------------------------------------------------------------------------------------------------------------------------------------------------------------------------------------------------------------------------------------------------------------------------------------------------------------------------------------------------------------------------------------------------------------------------------------------------------------------------------------------------------------------------------------------------------------------------------------------------------------------------------------------------------------------------------------------------------------------------------------------------------------------------------------------------------------------------------------------------------------------------------------------------------------------------------------------------------------------------------------------------------------------------------------------------------------------------------------------------|---------------------------------------------------|---------------------------------------------------------------------------------|------------------------------------------------------------------------------------------------------------------------------------------------------------------------------------------------------------------------------------------------------------------------------------------------------------------------------------------------------------------------------------------------------------------------------------------------------------------------------------------------------------------------------------------------------------------------|--|
|  | <p>debilitating. It may be difficult to walk or stand.</p> <p><b>***Dizziness:**</b> The dizziness associated with ICI-associated hypophysitis can be severe and debilitating. It may be difficult to maintain balance and coordination.</p> <p><b>***Confusion:**</b> The confusion associated with ICI-associated hypophysitis can be mild or severe. It may be difficult to think clearly or make decisions.</p> <p><b>***Weight gain:**</b> The weight gain associated with ICI-associated hypophysitis is often unexplained. It may be due to a combination of factors, including fluid retention, decreased metabolism, and increased appetite.</p> <p><b>***Loss of appetite:**</b> The loss of appetite associated with ICI-associated hypophysitis can be severe and debilitating. It may be difficult to eat enough food to maintain a healthy weight.</p> <p><b>***Cold intolerance:**</b> The cold intolerance associated with ICI-associated hypophysitis is due to a decrease in thyroid hormone production. Patients may feel cold even when the room temperature is comfortable.</p> <p><b>***Constipation:**</b> The constipation associated with ICI-associated hypophysitis is due to a decrease in thyroid hormone production. Thyroid hormone helps to regulate the digestive system, so a decrease in thyroid hormone production can lead to constipation.</p> <p><b>***Dry skin:**</b> The dry skin associated with ICI-associated hypophysitis is due to a decrease in thyroid hormone production. Thyroid hormone helps to regulate the skin's oil production, so a decrease in thyroid hormone production can lead to dry skin.</p> <p><b>***Decreased libido:**</b> The decreased libido associated with ICI-associated hypophysitis is due to a decrease in sex hormone production. Sex hormones are produced by the pituitary gland, so a</p> | <p>can help to prevent serious complications.</p> | <p>not to discontinue ICIs for hypopituitarism, please talk to your doctor.</p> | <p>* It is important to monitor the patient's hormone levels closely and adjust the medication doses as needed.</p> <p>* Some patients may need to take hormone replacement therapy for the rest of their lives.</p> <p>* Patients with ICI-associated hypophysitis are at an increased risk of other immune-related adverse events (irAEs). It is important to monitor the patient for signs of other irAEs and treat them promptly.</p> <p>If you have any questions or concerns about the treatment of ICI-associated hypophysitis, please talk to your doctor.</p> |  |
|--|----------------------------------------------------------------------------------------------------------------------------------------------------------------------------------------------------------------------------------------------------------------------------------------------------------------------------------------------------------------------------------------------------------------------------------------------------------------------------------------------------------------------------------------------------------------------------------------------------------------------------------------------------------------------------------------------------------------------------------------------------------------------------------------------------------------------------------------------------------------------------------------------------------------------------------------------------------------------------------------------------------------------------------------------------------------------------------------------------------------------------------------------------------------------------------------------------------------------------------------------------------------------------------------------------------------------------------------------------------------------------------------------------------------------------------------------------------------------------------------------------------------------------------------------------------------------------------------------------------------------------------------------------------------------------------------------------------------------------------------------------------------------------------------------------------------------------------------------------------------------------|---------------------------------------------------|---------------------------------------------------------------------------------|------------------------------------------------------------------------------------------------------------------------------------------------------------------------------------------------------------------------------------------------------------------------------------------------------------------------------------------------------------------------------------------------------------------------------------------------------------------------------------------------------------------------------------------------------------------------|--|

|  |                                                                                                                                                                                                                                                                                                                                                                                                                                                                                                                                                                                                                                                                                                                                                                                                                                                                                                                                                                                       |  |  |  |  |
|--|---------------------------------------------------------------------------------------------------------------------------------------------------------------------------------------------------------------------------------------------------------------------------------------------------------------------------------------------------------------------------------------------------------------------------------------------------------------------------------------------------------------------------------------------------------------------------------------------------------------------------------------------------------------------------------------------------------------------------------------------------------------------------------------------------------------------------------------------------------------------------------------------------------------------------------------------------------------------------------------|--|--|--|--|
|  | <p>decrease in pituitary function can lead to decreased libido.</p> <p><b>***Erectile dysfunction:**</b><br/>The erectile dysfunction associated with ICI-associated hypophysitis is due to a decrease in testosterone production. Testosterone is a sex hormone that is produced by the testes, but the testes need signals from the pituitary gland to produce testosterone. Therefore, a decrease in pituitary function can lead to erectile dysfunction.</p> <p><b>***Vision changes:**</b> The vision changes associated with ICI-associated hypophysitis are due to pressure on the optic nerve from the enlarged pituitary gland. Vision changes can include blurred vision, double vision, and loss of vision.</p> <p>If you are experiencing any of the symptoms listed above while taking ICIs, it is important to see a doctor right away. ICI-associated hypophysitis and hypopituitarism are serious conditions, but they can be managed with appropriate treatment.</p> |  |  |  |  |
|--|---------------------------------------------------------------------------------------------------------------------------------------------------------------------------------------------------------------------------------------------------------------------------------------------------------------------------------------------------------------------------------------------------------------------------------------------------------------------------------------------------------------------------------------------------------------------------------------------------------------------------------------------------------------------------------------------------------------------------------------------------------------------------------------------------------------------------------------------------------------------------------------------------------------------------------------------------------------------------------------|--|--|--|--|

|                        | Rheumatologic Toxicity                                                                                                                                                                                                                                                                                                                                                                                                                                                                                                                                                                                                                                                                                                                                                                                                                                                                                                                                                                                                                                                                                                                                                                                                                                                                                                                                                                                                                                                                                                                                                              | Rheumatologic Toxicity                                                                                                                                                                                                                                                                                                                                                                                                                                                                                                                                                                                                                                                                                                                                                                                                                                                                                                                                                                                                                                                                                                                                                                                                                                                                                                                                                                                                                                                                                                                                                                                                                                                                                                                                              | Rheumatologic Toxicity                                                                                                                                                                                                                                                                                                                                                                                                                                                                                                                                                                                                                                                                                                                                                                                                                                                                                                                                                                                                                                                                                                                                                                                                                                                                                                                                                                                                                                                                                                                                                                                                                                                                                                              | Rheumatologic Toxicity                                                                                                                                                                                                                                                                                                                                                                                                                                                                                                                                                                                                                                                                                                                                                                                                                                                                                                                                                                                                                                                                                                                                                                                                                                                                                                                                                                                                                                                                                                                                                                                                                                                                                                                                                                                        | Rheumatologic Toxicity                                                                                                                                                                                                                                                                                                                                                                                                                                                                                                                                                                                                                                                                                                                                                                                                                                                                                                                                                                                                                                                                                                                                                                                                                                                                                                                                                                                                                                                                                                                                                                                                                                                                                                                                                                                                                                                                                                                                                                                                                  |
|------------------------|-------------------------------------------------------------------------------------------------------------------------------------------------------------------------------------------------------------------------------------------------------------------------------------------------------------------------------------------------------------------------------------------------------------------------------------------------------------------------------------------------------------------------------------------------------------------------------------------------------------------------------------------------------------------------------------------------------------------------------------------------------------------------------------------------------------------------------------------------------------------------------------------------------------------------------------------------------------------------------------------------------------------------------------------------------------------------------------------------------------------------------------------------------------------------------------------------------------------------------------------------------------------------------------------------------------------------------------------------------------------------------------------------------------------------------------------------------------------------------------------------------------------------------------------------------------------------------------|---------------------------------------------------------------------------------------------------------------------------------------------------------------------------------------------------------------------------------------------------------------------------------------------------------------------------------------------------------------------------------------------------------------------------------------------------------------------------------------------------------------------------------------------------------------------------------------------------------------------------------------------------------------------------------------------------------------------------------------------------------------------------------------------------------------------------------------------------------------------------------------------------------------------------------------------------------------------------------------------------------------------------------------------------------------------------------------------------------------------------------------------------------------------------------------------------------------------------------------------------------------------------------------------------------------------------------------------------------------------------------------------------------------------------------------------------------------------------------------------------------------------------------------------------------------------------------------------------------------------------------------------------------------------------------------------------------------------------------------------------------------------|-------------------------------------------------------------------------------------------------------------------------------------------------------------------------------------------------------------------------------------------------------------------------------------------------------------------------------------------------------------------------------------------------------------------------------------------------------------------------------------------------------------------------------------------------------------------------------------------------------------------------------------------------------------------------------------------------------------------------------------------------------------------------------------------------------------------------------------------------------------------------------------------------------------------------------------------------------------------------------------------------------------------------------------------------------------------------------------------------------------------------------------------------------------------------------------------------------------------------------------------------------------------------------------------------------------------------------------------------------------------------------------------------------------------------------------------------------------------------------------------------------------------------------------------------------------------------------------------------------------------------------------------------------------------------------------------------------------------------------------|---------------------------------------------------------------------------------------------------------------------------------------------------------------------------------------------------------------------------------------------------------------------------------------------------------------------------------------------------------------------------------------------------------------------------------------------------------------------------------------------------------------------------------------------------------------------------------------------------------------------------------------------------------------------------------------------------------------------------------------------------------------------------------------------------------------------------------------------------------------------------------------------------------------------------------------------------------------------------------------------------------------------------------------------------------------------------------------------------------------------------------------------------------------------------------------------------------------------------------------------------------------------------------------------------------------------------------------------------------------------------------------------------------------------------------------------------------------------------------------------------------------------------------------------------------------------------------------------------------------------------------------------------------------------------------------------------------------------------------------------------------------------------------------------------------------|-----------------------------------------------------------------------------------------------------------------------------------------------------------------------------------------------------------------------------------------------------------------------------------------------------------------------------------------------------------------------------------------------------------------------------------------------------------------------------------------------------------------------------------------------------------------------------------------------------------------------------------------------------------------------------------------------------------------------------------------------------------------------------------------------------------------------------------------------------------------------------------------------------------------------------------------------------------------------------------------------------------------------------------------------------------------------------------------------------------------------------------------------------------------------------------------------------------------------------------------------------------------------------------------------------------------------------------------------------------------------------------------------------------------------------------------------------------------------------------------------------------------------------------------------------------------------------------------------------------------------------------------------------------------------------------------------------------------------------------------------------------------------------------------------------------------------------------------------------------------------------------------------------------------------------------------------------------------------------------------------------------------------------------------|
| Question               | What is the initial diagnostic workup for suspected immune checkpoint inhibitor associated arthritis?                                                                                                                                                                                                                                                                                                                                                                                                                                                                                                                                                                                                                                                                                                                                                                                                                                                                                                                                                                                                                                                                                                                                                                                                                                                                                                                                                                                                                                                                               | What is the initial treatment for moderate (grade 2) arthritis associated with immune checkpoint inhibitors?                                                                                                                                                                                                                                                                                                                                                                                                                                                                                                                                                                                                                                                                                                                                                                                                                                                                                                                                                                                                                                                                                                                                                                                                                                                                                                                                                                                                                                                                                                                                                                                                                                                        | What adjunctive immunosuppressive treatments can be used for arthritis from immune checkpoint inhibitors as alternatives to corticosteroids?                                                                                                                                                                                                                                                                                                                                                                                                                                                                                                                                                                                                                                                                                                                                                                                                                                                                                                                                                                                                                                                                                                                                                                                                                                                                                                                                                                                                                                                                                                                                                                                        | What is the treatment for xerostomia associated with immune checkpoint inhibitors?                                                                                                                                                                                                                                                                                                                                                                                                                                                                                                                                                                                                                                                                                                                                                                                                                                                                                                                                                                                                                                                                                                                                                                                                                                                                                                                                                                                                                                                                                                                                                                                                                                                                                                                            | If a patient has immune checkpoint inhibitor associated myositis, what are life threatening complications that can occur?                                                                                                                                                                                                                                                                                                                                                                                                                                                                                                                                                                                                                                                                                                                                                                                                                                                                                                                                                                                                                                                                                                                                                                                                                                                                                                                                                                                                                                                                                                                                                                                                                                                                                                                                                                                                                                                                                                               |
| Answer Engine 2 (Bard) | <p>The initial diagnostic workup for suspected immune checkpoint inhibitor (ICI)-associated arthritis should include the following:</p> <p><b>Physical examination:</b> The doctor will perform a physical examination to assess the patient's joints for tenderness, swelling, warmth, and redness. The doctor will also look for other signs of inflammation, such as fever and rash.</p> <p><b>Blood tests:</b> The doctor will order blood tests to check for signs of inflammation, such as elevated erythrocyte sedimentation rate (ESR) and C-reactive protein (CRP). The doctor may also order blood tests to rule out other possible causes of the patient's symptoms, such as infection and autoimmune diseases.</p> <p><b>Imaging studies:</b> The doctor may order imaging studies, such as X-rays and MRI scans, to look for signs of joint damage.</p> <p>In some cases, the doctor may also order other tests, such as joint fluid analysis and synovial biopsy.</p> <p><b>Joint fluid analysis</b> is a procedure in which a small sample of fluid is removed from the affected joint and examined under a microscope. Joint fluid analysis can help to identify the cause of the inflammation in the joint.</p> <p><b>Synovial biopsy</b> is a procedure in which a small sample of tissue is removed from the lining of the affected joint and examined under a microscope. Synovial biopsy can help to confirm the diagnosis of ICI-associated arthritis.</p> <p>Once the doctor has completed the initial diagnostic workup, they will be able to develop a</p> | <p>The initial treatment for moderate (grade 2) arthritis associated with immune checkpoint inhibitors (ICIs) is typically <b>nonsteroidal anti-inflammatory drugs (NSAIDs)</b>. NSAIDs are over-the-counter medications that can help to reduce inflammation and pain. Some common NSAIDs include ibuprofen, naproxen, and aspirin.</p> <p>If NSAIDs are not effective or are not tolerated, the doctor may prescribe <b>glucocorticoids</b>. Glucocorticoids are powerful anti-inflammatory drugs that can be taken orally or injected into the affected joint.</p> <p>In some cases, the doctor may also prescribe <b>disease-modifying antirheumatic drugs (DMARDs)</b>. DMARDs are medications that can help to slow the progression of ICI-associated arthritis. Some common DMARDs include methotrexate, sulfasalazine, and leflunomide.</p> <p>The specific treatment plan that is right for a patient with moderate ICI-associated arthritis will depend on the severity of the arthritis, the patient's other medical conditions, and the patient's response to treatment.</p> <p>Here are some additional things to keep in mind about the treatment of moderate ICI-associated arthritis:</p> <ul style="list-style-type: none"> <li>It is important to start treatment early to prevent joint damage.</li> <li>The goal of treatment is to control the inflammation and pain, and to prevent joint damage.</li> <li>Treatment should be individualized based on the patient's individual needs.</li> <li>It is important to monitor the patient's response to treatment and adjust the treatment plan as needed.</li> </ul> <p>If you have any questions or concerns about the treatment of moderate ICI-associated arthritis, please talk to your</p> | <p>There are a number of adjunctive immunosuppressive treatments that can be used for arthritis from immune checkpoint inhibitors (ICIs) as alternatives to corticosteroids. These include:</p> <ul style="list-style-type: none"> <li><b>Disease-modifying antirheumatic drugs (DMARDs):</b> DMARDs are a class of medications that can help to slow the progression of ICI-associated arthritis and prevent joint damage. Some common DMARDs include methotrexate, sulfasalazine, and leflunomide.</li> <li><b>Biologic agents:</b> Biologic agents are a newer class of medications that target specific molecules in the immune system. Some biologic agents that have been used to treat ICI-associated arthritis include tocilizumab, adalimumab, and infliximab.</li> <li><b>Janus kinase (JAK) inhibitors:</b> JAK inhibitors are a newer class of medications that block the activity of a group of enzymes called Janus kinases. JAK inhibitors have been shown to be effective in treating a variety of inflammatory diseases, including ICI-associated arthritis. Some common JAK inhibitors include tofacitinib and baricitinib.</li> </ul> <p>The specific adjunctive immunosuppressive treatment that is best for a patient will depend on the severity of the arthritis, the patient's other medical conditions, and the patient's response to other treatments.</p> <p>Here is a summary of the adjunctive immunosuppressive treatments that can be used for arthritis from ICIs as alternatives to corticosteroids:</p> <ul style="list-style-type: none"> <li><b>DMARDs</b></li> <li><b>Biologic agents</b></li> <li><b>JAK inhibitors</b></li> </ul> <p>The doctor will choose the best treatment option or</p> | <p>The treatment for xerostomia associated with immune checkpoint inhibitors (ICIs) is aimed at relieving the symptoms and preventing complications.</p> <p>Here are some tips for managing xerostomia associated with ICIs:</p> <ul style="list-style-type: none"> <li><b>Stay hydrated:</b> Drink plenty of fluids throughout the day, even if you don't feel thirsty. Water is the best choice, but other fluids such as unsweetened tea, juice, and milk can also be helpful.</li> <li><b>Avoid sugary drinks:</b> Sugary drinks can dehydrate the mouth and make xerostomia worse.</li> <li><b>Use artificial saliva:</b> Artificial saliva products can help to lubricate the mouth and make it feel less dry. They are available in a variety of forms, such as sprays, gels, and lozenges.</li> <li><b>Chew sugarless gum or candy:</b> Chewing sugarless gum or candy can help to stimulate saliva production.</li> <li><b>Avoid smoking and tobacco use:</b> Smoking and tobacco use can dry out the mouth and make xerostomia worse.</li> <li><b>Use a humidifier:</b> A humidifier can add moisture to the air and help to reduce dryness in the mouth.</li> </ul> <p>Medications may also be used to treat xerostomia associated with ICIs. Common medications include:</p> <ul style="list-style-type: none"> <li><b>Pilocarpine:</b> Pilocarpine is a prescription medication that stimulates saliva production. It is available in pill and eye drop form.</li> <li><b>Cevimeline:</b> Cevimeline is a prescription medication that stimulates saliva production. It is available in pill form.</li> <li><b>Xerostomia lozenges or mouthwashes:</b> These products contain ingredients that can help to lubricate the mouth and relieve dryness.</li> </ul> <p>If xerostomia is severe or</p> | <p>Immune checkpoint inhibitor (ICI)-associated myositis is a rare but serious complication of ICI therapy. It is characterized by inflammation of the muscles, which can lead to muscle weakness, pain, and fatigue. In severe cases, ICI-associated myositis can lead to life-threatening complications, such as:</p> <ul style="list-style-type: none"> <li><b>Respiratory failure:</b> If the muscles that control breathing are affected, it can lead to respiratory failure. This is a life-threatening condition in which the body is unable to get enough oxygen.</li> <li><b>Cardiac arrhythmias:</b> Inflammation of the heart muscle can lead to cardiac arrhythmias, which are abnormal heart rhythms. Cardiac arrhythmias can be life-threatening if they cause the heart to stop beating or beat too slowly or too fast.</li> <li><b>Rhabdomyolysis:</b> Rhabdomyolysis is a condition in which muscle tissue breaks down and releases harmful proteins into the bloodstream. Rhabdomyolysis can lead to kidney failure and death.</li> </ul> <p>Other life-threatening complications of ICI-associated myositis include:</p> <ul style="list-style-type: none"> <li><b>Sepsis:</b> Sepsis is a life-threatening condition in which the body's response to infection damages its own tissues and organs.</li> <li><b>Multisystem organ failure:</b> Multisystem organ failure is a condition in which two or more organs fail to function properly.</li> <li><b>Death:</b> In rare cases, ICI-associated myositis can lead to death.</li> </ul> <p>It is important to note that these are life-threatening complications, but they are not inevitable. With early diagnosis and treatment, most patients with ICI-associated myositis will make a full recovery.</p> <p>If you are taking ICIs and develop any symptoms of myositis, such as muscle weakness, pain, or fatigue, it is important to see a doctor right away. Early diagnosis and treatment are essential to preventing life-threatening complications.</p> |

|  |                                                                                                                                                                                                                                                                                                                                                                                                                                                                                                                                                                                                                                                                                                                                                         |                                                                                                                                                                                                                                                                                                                                                                                                    |                                                                                                                                                                                                                                                                              |                                                                                                                                                                                                                                                                                                                                                                                                                                                                                                                                                                                                                                                                                                                                                                                                                              |  |
|--|---------------------------------------------------------------------------------------------------------------------------------------------------------------------------------------------------------------------------------------------------------------------------------------------------------------------------------------------------------------------------------------------------------------------------------------------------------------------------------------------------------------------------------------------------------------------------------------------------------------------------------------------------------------------------------------------------------------------------------------------------------|----------------------------------------------------------------------------------------------------------------------------------------------------------------------------------------------------------------------------------------------------------------------------------------------------------------------------------------------------------------------------------------------------|------------------------------------------------------------------------------------------------------------------------------------------------------------------------------------------------------------------------------------------------------------------------------|------------------------------------------------------------------------------------------------------------------------------------------------------------------------------------------------------------------------------------------------------------------------------------------------------------------------------------------------------------------------------------------------------------------------------------------------------------------------------------------------------------------------------------------------------------------------------------------------------------------------------------------------------------------------------------------------------------------------------------------------------------------------------------------------------------------------------|--|
|  | <p>treatment plan for the patient.</p> <p>Here are some additional tips for diagnosing ICI-associated arthritis:</p> <ul style="list-style-type: none"> <li>* Consider the patient's medical history, including the type of ICI they are taking and how long they have been taking it.</li> <li>* Be aware of the symptoms of ICI-associated arthritis, such as joint pain, stiffness, swelling, and redness.</li> <li>* Order appropriate blood tests and imaging studies to rule out other possible causes of the patient's symptoms.</li> <li>* Consider joint fluid analysis and synovial biopsy if necessary.</li> </ul> <p>If you have any questions or concerns about the diagnosis of ICI-associated arthritis, please talk to your doctor.</p> | <p>doctor.</p> <p><b>**Here is a summary of the initial treatment options for moderate (grade 2) arthritis associated with immune checkpoint inhibitors:**</b></p> <ul style="list-style-type: none"> <li>* NSAIDs</li> <li>* Glucocorticoids</li> <li>* DMARDs</li> </ul> <p>The doctor will choose the best treatment option or combination of treatment options for the individual patient.</p> | <p>combination of treatment options for the individual patient.</p> <p>It is important to note that these adjunctive immunosuppressive treatments can have side effects, so it is important to discuss the risks and benefits with the doctor before starting treatment.</p> | <p>does not respond to other treatments, the doctor may recommend additional treatments, such as:**</p> <p><b>**Sialendoscopy:**</b><br/>Sialendoscopy is a procedure in which a small camera is inserted into the salivary duct to look for blockages. If a blockage is found, it can be removed using a laser or other instruments.</p> <p><b>**Salivary gland surgery:**</b><br/>In rare cases, surgery may be necessary to treat xerostomia. Surgery may involve transplanting a salivary gland from another part of the body to the mouth, or creating a new salivary duct.</p> <p>It is important to work with the doctor to develop a treatment plan that is right for you. The best treatment plan will depend on the severity of the xerostomia, your other medical conditions, and your response to treatment.</p> |  |
|--|---------------------------------------------------------------------------------------------------------------------------------------------------------------------------------------------------------------------------------------------------------------------------------------------------------------------------------------------------------------------------------------------------------------------------------------------------------------------------------------------------------------------------------------------------------------------------------------------------------------------------------------------------------------------------------------------------------------------------------------------------------|----------------------------------------------------------------------------------------------------------------------------------------------------------------------------------------------------------------------------------------------------------------------------------------------------------------------------------------------------------------------------------------------------|------------------------------------------------------------------------------------------------------------------------------------------------------------------------------------------------------------------------------------------------------------------------------|------------------------------------------------------------------------------------------------------------------------------------------------------------------------------------------------------------------------------------------------------------------------------------------------------------------------------------------------------------------------------------------------------------------------------------------------------------------------------------------------------------------------------------------------------------------------------------------------------------------------------------------------------------------------------------------------------------------------------------------------------------------------------------------------------------------------------|--|

|                        | Neuromuscular Toxicity                                                                                                                                                                                                                                                                                                                                                                                                                                                                                                                                                                                                                                                                                                                                                                                                                                                                                                                                                                                                                                                                                                                                                                                                                                                                                                                                                                                                                                                                   | Neuromuscular Toxicity                                                                                                                                                                                                                                                                                                                                                                                                                                                                                                                                                                                                                                                                                                                                                                                                                                                                                                                                                                                                                                                                                                                                                                                                                                                                                                                                                                                                                                                                                                                                                                                                                                                                                                                                                             | Neuromuscular Toxicity                                                                                                                                                                                                                                                                                                                                                                                                                                                                                                                                                                                                                                                                                                                                                                                                                                                                                                                                                                                                                                                                                                                                                                                                                                                                                                                                                                                                                                                                                                                                                                                                                                                                                                             | Neuromuscular Toxicity                                                                                                                                                                                                                                                                                                                                                                                                                                                                                                                                                                                                                                                                                                                                                                                                                                                                                                                                                                                                                                                                                                                                                                                                                                                                                                                                                                                                                                                                                                                                                                                                                                                                                                                                                                                                                                     | Neuromuscular Toxicity                                                                                                                                                                                                                                                                                                                                                                                                                                                                                                                                                                                                                                                                                                                                                                                                                                                                                                                                                                                                                                                                                                                                                                                                                                                                                                                                                                                                                                                                                                                                                                                                                                                                                                                                                                                                                                                                                                                                                                                                                     |
|------------------------|------------------------------------------------------------------------------------------------------------------------------------------------------------------------------------------------------------------------------------------------------------------------------------------------------------------------------------------------------------------------------------------------------------------------------------------------------------------------------------------------------------------------------------------------------------------------------------------------------------------------------------------------------------------------------------------------------------------------------------------------------------------------------------------------------------------------------------------------------------------------------------------------------------------------------------------------------------------------------------------------------------------------------------------------------------------------------------------------------------------------------------------------------------------------------------------------------------------------------------------------------------------------------------------------------------------------------------------------------------------------------------------------------------------------------------------------------------------------------------------|------------------------------------------------------------------------------------------------------------------------------------------------------------------------------------------------------------------------------------------------------------------------------------------------------------------------------------------------------------------------------------------------------------------------------------------------------------------------------------------------------------------------------------------------------------------------------------------------------------------------------------------------------------------------------------------------------------------------------------------------------------------------------------------------------------------------------------------------------------------------------------------------------------------------------------------------------------------------------------------------------------------------------------------------------------------------------------------------------------------------------------------------------------------------------------------------------------------------------------------------------------------------------------------------------------------------------------------------------------------------------------------------------------------------------------------------------------------------------------------------------------------------------------------------------------------------------------------------------------------------------------------------------------------------------------------------------------------------------------------------------------------------------------|------------------------------------------------------------------------------------------------------------------------------------------------------------------------------------------------------------------------------------------------------------------------------------------------------------------------------------------------------------------------------------------------------------------------------------------------------------------------------------------------------------------------------------------------------------------------------------------------------------------------------------------------------------------------------------------------------------------------------------------------------------------------------------------------------------------------------------------------------------------------------------------------------------------------------------------------------------------------------------------------------------------------------------------------------------------------------------------------------------------------------------------------------------------------------------------------------------------------------------------------------------------------------------------------------------------------------------------------------------------------------------------------------------------------------------------------------------------------------------------------------------------------------------------------------------------------------------------------------------------------------------------------------------------------------------------------------------------------------------|------------------------------------------------------------------------------------------------------------------------------------------------------------------------------------------------------------------------------------------------------------------------------------------------------------------------------------------------------------------------------------------------------------------------------------------------------------------------------------------------------------------------------------------------------------------------------------------------------------------------------------------------------------------------------------------------------------------------------------------------------------------------------------------------------------------------------------------------------------------------------------------------------------------------------------------------------------------------------------------------------------------------------------------------------------------------------------------------------------------------------------------------------------------------------------------------------------------------------------------------------------------------------------------------------------------------------------------------------------------------------------------------------------------------------------------------------------------------------------------------------------------------------------------------------------------------------------------------------------------------------------------------------------------------------------------------------------------------------------------------------------------------------------------------------------------------------------------------------------|--------------------------------------------------------------------------------------------------------------------------------------------------------------------------------------------------------------------------------------------------------------------------------------------------------------------------------------------------------------------------------------------------------------------------------------------------------------------------------------------------------------------------------------------------------------------------------------------------------------------------------------------------------------------------------------------------------------------------------------------------------------------------------------------------------------------------------------------------------------------------------------------------------------------------------------------------------------------------------------------------------------------------------------------------------------------------------------------------------------------------------------------------------------------------------------------------------------------------------------------------------------------------------------------------------------------------------------------------------------------------------------------------------------------------------------------------------------------------------------------------------------------------------------------------------------------------------------------------------------------------------------------------------------------------------------------------------------------------------------------------------------------------------------------------------------------------------------------------------------------------------------------------------------------------------------------------------------------------------------------------------------------------------------------|
| Question               | What are the primary treatments for immune checkpoint inhibitor associated myasthenia gravis?                                                                                                                                                                                                                                                                                                                                                                                                                                                                                                                                                                                                                                                                                                                                                                                                                                                                                                                                                                                                                                                                                                                                                                                                                                                                                                                                                                                            | What is the primary treatment for immune checkpoint inhibitor associated encephalitis?                                                                                                                                                                                                                                                                                                                                                                                                                                                                                                                                                                                                                                                                                                                                                                                                                                                                                                                                                                                                                                                                                                                                                                                                                                                                                                                                                                                                                                                                                                                                                                                                                                                                                             | What supportive care treatments should patients treated with immune checkpoint inhibitors who develop myasthenia gravis or Guillain Barre syndrome receive?                                                                                                                                                                                                                                                                                                                                                                                                                                                                                                                                                                                                                                                                                                                                                                                                                                                                                                                                                                                                                                                                                                                                                                                                                                                                                                                                                                                                                                                                                                                                                                        | What is the differential diagnosis for immune checkpoint inhibitor associated meningitis?                                                                                                                                                                                                                                                                                                                                                                                                                                                                                                                                                                                                                                                                                                                                                                                                                                                                                                                                                                                                                                                                                                                                                                                                                                                                                                                                                                                                                                                                                                                                                                                                                                                                                                                                                                  | What are indications associated with neurologic toxicities to permanently discontinue immune checkpoint inhibitors?                                                                                                                                                                                                                                                                                                                                                                                                                                                                                                                                                                                                                                                                                                                                                                                                                                                                                                                                                                                                                                                                                                                                                                                                                                                                                                                                                                                                                                                                                                                                                                                                                                                                                                                                                                                                                                                                                                                        |
| Answer Engine 2 (Bard) | <p>The primary treatments for immune checkpoint inhibitor (ICI)-associated myasthenia gravis (MG) are:</p> <p><b>**Corticosteroids:**</b> Corticosteroids are powerful anti-inflammatory drugs that can help to suppress the autoimmune response that is causing the MG.</p> <p><b>**Pyridostigmine:**</b> Pyridostigmine is a medication that helps to improve communication between the nerves and muscles. It can help to improve muscle strength and reduce fatigue in patients with MG.</p> <p><b>**Intravenous immunoglobulin (IVIg):**</b> IVIg is a blood product that contains antibodies from healthy people. It can be used to treat MG by suppressing the autoimmune response and improving muscle strength.</p> <p><b>**Plasma exchange (PLEX):**</b> PLEX is a procedure in which the patient's blood is filtered to remove harmful antibodies. It can be used to treat severe MG that does not respond to other treatments.</p> <p>In some cases, other medications, such as azathioprine and mycophenolate mofetil, may also be used to treat ICI-associated MG.</p> <p>The specific treatment plan that is right for a patient with ICI-associated MG will depend on the severity of the MG, the patient's other medical conditions, and the patient's response to treatment.</p> <p>In addition to medication, there are a number of things that patients with ICI-associated MG can do to manage their symptoms and improve their quality of life. These include:</p> | <p>The primary treatment for immune checkpoint inhibitor (ICI)-associated encephalitis is high-dose corticosteroids, such as prednisone. Corticosteroids are powerful anti-inflammatory drugs that can help to suppress the autoimmune response that is causing the encephalitis.</p> <p>In some cases, other medications, such as intravenous immunoglobulin (IVIg) and plasma exchange (PLEX), may also be used to treat ICI-associated encephalitis. IVIg is a blood product that contains antibodies from healthy people. It can be used to treat ICI-associated encephalitis by suppressing the autoimmune response. PLEX is a procedure in which the patient's blood is filtered to remove harmful antibodies. It can be used to treat severe ICI-associated encephalitis that does not respond to corticosteroids.</p> <p>In addition to medication, there are a number of things that patients with ICI-associated encephalitis may need, such as:</p> <ul style="list-style-type: none"> <li>* Supportive care in a hospital or intensive care unit (ICU)</li> <li>* Mechanical ventilation to help with breathing</li> <li>* Medications to control seizures and other symptoms</li> <li>* Rehabilitation therapy to help regain lost function</li> </ul> <p>The specific treatment plan that is right for a patient with ICI-associated encephalitis will depend on the severity of the encephalitis, the patient's other medical conditions, and the patient's response to treatment.</p> <p>It is important to note that ICI-associated encephalitis is a rare and serious condition. It is important to seek medical attention immediately if you are taking ICIs and develop any symptoms of encephalitis, such as headache, confusion, seizures, or changes in</p> | <p>Patients treated with immune checkpoint inhibitors (ICIs) who develop myasthenia gravis (MG) or Guillain-Barré syndrome (GBS) should receive the following supportive care treatments:</p> <p><b>**Monitoring of vital signs:**</b> This includes monitoring the patient's heart rate, blood pressure, respiratory rate, and temperature.</p> <p><b>**Fluid and electrolyte management:**</b> Patients with MG or GBS may need to receive intravenous fluids to maintain hydration and electrolyte balance.</p> <p><b>**Nutritional support:**</b> Patients with MG or GBS may have difficulty eating and drinking. They may need to receive nutritional support through a feeding tube or intravenous nutrition.</p> <p><b>**Respiratory support:**</b> Patients with MG or GBS may need respiratory support, such as mechanical ventilation, if they have difficulty breathing.</p> <p><b>**Physical therapy:**</b> Physical therapy can help patients with MG or GBS to regain muscle strength and function.</p> <p><b>**Occupational therapy:**</b> Occupational therapy can help patients with MG or GBS to learn how to perform activities of daily living with their limitations.</p> <p>In addition to these supportive care treatments, patients with MG or GBS may also need to receive specific medications to treat their condition. For example, patients with MG may need to receive corticosteroids, pyridostigmine, or intravenous immunoglobulin (IVIg). Patients with GBS may need to receive IVIg or plasma exchange.</p> <p>The specific supportive care treatments and medications that a patient with MG or GBS needs will depend on the severity of their condition and their response to treatment.</p> | <p>The differential diagnosis for immune checkpoint inhibitor (ICI)-associated meningitis is broad and includes both infectious and non-infectious causes.</p> <p><b>## Infectious causes</b></p> <ul style="list-style-type: none"> <li>* Bacterial meningitis</li> <li>* Viral meningitis</li> <li>* Fungal meningitis</li> <li>* Tuberculosis meningitis</li> <li>* Parasitic meningitis</li> </ul> <p><b>## Non-infectious causes</b></p> <ul style="list-style-type: none"> <li>* ICI-associated aseptic meningitis</li> <li>* Other immune-related adverse events (irAEs) such as encephalitis, myelitis, and Guillain-Barré syndrome</li> <li>* Subarachnoid hemorrhage</li> <li>* Carcinomatous meningitis</li> <li>* Drug-induced meningitis</li> </ul> <p><b>### ICI-associated aseptic meningitis</b></p> <p>ICI-associated aseptic meningitis is the most common type of meningitis associated with ICI therapy. It is characterized by inflammation of the meninges, the membranes that surround the brain and spinal cord. The exact mechanism of ICI-associated aseptic meningitis is not fully understood, but it is thought to be an autoimmune reaction.</p> <p><b>### Other immune-related adverse events (irAEs)</b></p> <p>irAEs are a range of side effects that can occur in patients receiving ICI therapy. These side effects are caused by the immune system attacking healthy cells and tissues. Other irAEs that can affect the central nervous system include encephalitis, myelitis, and Guillain-Barré syndrome.</p> <p><b>### Subarachnoid hemorrhage</b></p> <p>Subarachnoid hemorrhage is a type of stroke that occurs when a blood vessel in the brain ruptures. The blood can leak into the subarachnoid space, which is the space between the brain and the meninges. This can cause inflammation of the meninges</p> | <p>The following indications are associated with neurologic toxicities to permanently discontinue immune checkpoint inhibitors (ICIs):</p> <ul style="list-style-type: none"> <li>* Grade 3 or 4 neurologic toxicity that is not responsive to treatment or is associated with significant morbidity or mortality</li> <li>* Grade 2 neurologic toxicity that is progressive or does not respond to treatment</li> <li>* Any neurologic toxicity that is accompanied by other severe immune-related adverse events (irAEs)</li> </ul> <p>Examples of grade 3 or 4 neurologic toxicities that may warrant permanent discontinuation of ICIs include:</p> <ul style="list-style-type: none"> <li>* Myasthenia gravis with bulbar involvement or respiratory failure</li> <li>* Guillain-Barré syndrome with respiratory failure</li> <li>* Encephalitis or meningitis with significant neurologic impairment</li> <li>* Transverse myelitis with significant neurologic impairment</li> </ul> <p>Examples of grade 2 neurologic toxicities that may warrant permanent discontinuation of ICIs if they are progressive or do not respond to treatment include:</p> <ul style="list-style-type: none"> <li>* Peripheral neuropathy with significant sensory or motor impairment</li> <li>* Myasthenia gravis with mild to moderate symptoms</li> <li>* Encephalitis or meningitis with mild to moderate neurologic impairment</li> <li>* Transverse myelitis with mild to moderate neurologic impairment</li> </ul> <p>It is important to note that the decision of whether or not to permanently discontinue ICIs for neurologic toxicity is a complex one that should be made on a case-by-case basis, taking into account the severity of the neurologic toxicity, the response to treatment, and the patient's overall prognosis.</p> <p>In addition to the indications listed above, the following factors may also be considered when making the decision of whether or not to permanently discontinue ICIs for neurologic toxicity:</p> |



|  |                                                                                                                                                                                                                                                                                                                                                                                      |                                                                                                                                               |                                                                                                                                                                                                                                                                                                                                                                                                                                                                                                                                                                                                                                                                                                                                                                                                                                                                                                                                                                                                                                                              |                                                                                                                                                                                                                                                                                                                                                                                                                                                                                                                                                                                                                                                                                                                                                                                                                                                                                                                                                                                                                                                                                                                                                                                                                                                                                                                                                                                                                                                                                                                                                                                                                                                                                                                                                                                                                                                                                                                                |                                                                                                                                                                                                                                                                                                                                                                                        |
|--|--------------------------------------------------------------------------------------------------------------------------------------------------------------------------------------------------------------------------------------------------------------------------------------------------------------------------------------------------------------------------------------|-----------------------------------------------------------------------------------------------------------------------------------------------|--------------------------------------------------------------------------------------------------------------------------------------------------------------------------------------------------------------------------------------------------------------------------------------------------------------------------------------------------------------------------------------------------------------------------------------------------------------------------------------------------------------------------------------------------------------------------------------------------------------------------------------------------------------------------------------------------------------------------------------------------------------------------------------------------------------------------------------------------------------------------------------------------------------------------------------------------------------------------------------------------------------------------------------------------------------|--------------------------------------------------------------------------------------------------------------------------------------------------------------------------------------------------------------------------------------------------------------------------------------------------------------------------------------------------------------------------------------------------------------------------------------------------------------------------------------------------------------------------------------------------------------------------------------------------------------------------------------------------------------------------------------------------------------------------------------------------------------------------------------------------------------------------------------------------------------------------------------------------------------------------------------------------------------------------------------------------------------------------------------------------------------------------------------------------------------------------------------------------------------------------------------------------------------------------------------------------------------------------------------------------------------------------------------------------------------------------------------------------------------------------------------------------------------------------------------------------------------------------------------------------------------------------------------------------------------------------------------------------------------------------------------------------------------------------------------------------------------------------------------------------------------------------------------------------------------------------------------------------------------------------------|----------------------------------------------------------------------------------------------------------------------------------------------------------------------------------------------------------------------------------------------------------------------------------------------------------------------------------------------------------------------------------------|
|  | <ul style="list-style-type: none"> <li>* Getting plenty of rest</li> <li>* Eating a healthy diet</li> <li>* Avoiding strenuous activity</li> <li>* Using adaptive devices, such as canes and walkers, to help with mobility</li> <li>* Managing stress</li> </ul> <p>If you have any questions or concerns about the treatment of ICI-associated MG, please talk to your doctor.</p> | <p>behavior.</p> <p>If you have any questions or concerns about the treatment of ICI-associated encephalitis, please talk to your doctor.</p> | <p>Here are some additional tips for providing supportive care to patients with MG or GBS:</p> <ul style="list-style-type: none"> <li>* Be patient and understanding. Patients with MG or GBS may experience fatigue, weakness, and other symptoms that can make it difficult for them to perform activities of daily living.</li> <li>* Provide a safe and comfortable environment. Patients with MG or GBS may be at risk of falls and other injuries. Make sure that their environment is free of hazards and that they have access to assistive devices if needed.</li> <li>* Encourage the patient to participate in their care. As much as possible, involve the patient in making decisions about their care. This will help them to feel more in control of their situation.</li> <li>* Provide support to the patient's family and caregivers. MG and GBS can be stressful for both the patient and their loved ones. Provide support and resources to the patient's family and caregivers so that they can help the patient to recover.</li> </ul> | <p>and meningitis.</p> <p>### Carcinomatous meningitis</p> <p>Carcinomatous meningitis is a type of meningitis that occurs when cancer cells spread to the meninges. This can happen through the bloodstream or through direct extension of the tumor.</p> <p>### Drug-induced meningitis</p> <p>Drug-induced meningitis is a rare side effect of certain medications, including some antibiotics and nonsteroidal anti-inflammatory drugs (NSAIDs).</p> <p>## Diagnostic workup</p> <p>The diagnostic workup for ICI-associated meningitis will typically include a lumbar puncture. This is a procedure in which a needle is inserted into the spinal cord to collect cerebrospinal fluid (CSF). The CSF is then analyzed for signs of infection and inflammation.</p> <p>Other tests that may be ordered include blood tests, imaging studies, and electroencephalography (EEG). Blood tests can help to rule out infection and other causes of meningitis. Imaging studies can help to identify any underlying structural abnormalities of the brain. EEG can help to assess the electrical activity of the brain and identify any abnormalities.</p> <p>## Treatment</p> <p>The treatment of ICI-associated meningitis will depend on the underlying cause. If the meningitis is caused by an infection, then antibiotics or other anti-infective medications will be needed. If the meningitis is caused by an irAE, then corticosteroids or other immunosuppressive medications will be needed.</p> <p>In some cases, patients with ICI-associated meningitis may need to be hospitalized for supportive care and monitoring. Supportive care may include intravenous fluids, pain medication, and respiratory support.</p> <p>## Prognosis</p> <p>The prognosis for patients with ICI-associated meningitis is generally good with prompt diagnosis and treatment. However, some patients may experience long-term</p> | <ul style="list-style-type: none"> <li>* The patient's cancer type and stage</li> <li>* The patient's response to ICI therapy</li> <li>* The patient's other medical conditions</li> <li>* The patient's preferences</li> </ul> <p>If you have any questions or concerns about whether or not to permanently discontinue ICIs for neurologic toxicity, please talk to your doctor.</p> |
|--|--------------------------------------------------------------------------------------------------------------------------------------------------------------------------------------------------------------------------------------------------------------------------------------------------------------------------------------------------------------------------------------|-----------------------------------------------------------------------------------------------------------------------------------------------|--------------------------------------------------------------------------------------------------------------------------------------------------------------------------------------------------------------------------------------------------------------------------------------------------------------------------------------------------------------------------------------------------------------------------------------------------------------------------------------------------------------------------------------------------------------------------------------------------------------------------------------------------------------------------------------------------------------------------------------------------------------------------------------------------------------------------------------------------------------------------------------------------------------------------------------------------------------------------------------------------------------------------------------------------------------|--------------------------------------------------------------------------------------------------------------------------------------------------------------------------------------------------------------------------------------------------------------------------------------------------------------------------------------------------------------------------------------------------------------------------------------------------------------------------------------------------------------------------------------------------------------------------------------------------------------------------------------------------------------------------------------------------------------------------------------------------------------------------------------------------------------------------------------------------------------------------------------------------------------------------------------------------------------------------------------------------------------------------------------------------------------------------------------------------------------------------------------------------------------------------------------------------------------------------------------------------------------------------------------------------------------------------------------------------------------------------------------------------------------------------------------------------------------------------------------------------------------------------------------------------------------------------------------------------------------------------------------------------------------------------------------------------------------------------------------------------------------------------------------------------------------------------------------------------------------------------------------------------------------------------------|----------------------------------------------------------------------------------------------------------------------------------------------------------------------------------------------------------------------------------------------------------------------------------------------------------------------------------------------------------------------------------------|

|  |  |  |  |                                                                                                                                                                                                                                                                                                                                             |  |
|--|--|--|--|---------------------------------------------------------------------------------------------------------------------------------------------------------------------------------------------------------------------------------------------------------------------------------------------------------------------------------------------|--|
|  |  |  |  | <p>neurological complications, such as headache, fatigue, and cognitive impairment.</p> <p>## Conclusion</p> <p>The differential diagnosis for ICI-associated meningitis is broad and includes both infectious and non-infectious causes. Prompt diagnosis and treatment are essential to prevent long-term neurological complications.</p> |  |
|--|--|--|--|---------------------------------------------------------------------------------------------------------------------------------------------------------------------------------------------------------------------------------------------------------------------------------------------------------------------------------------------|--|

|                        | Cardiac Toxicity                                                                                                                                                                                                                                                                                                                                                                                                                                                                                                                                                                                                                                                                                                                                                                                                                                                                                                                                                                                                                                                                                                                                                                                                                                                                                                                                                                                                                                                                                                                                                                                                      | Cardiac Toxicity                                                                                                                                                                                                                                                                                                                                                                                                                                                                                                                                                                                                                                                                                                                                                                                                                                                                                                                                                                                                                                                                                                                                                                                                                                                                                                                                                                                                                                                                                                                                                                                                                                                                                                                                                                                                                               | Cardiac Toxicity                                                                                                                                                                                                                                                                                                                                                                                                                                                                                                                                                                                                                                                                                                                                                                                                                                                                                                                                                                                                                                                                                                                                                                                                                                                                                                                                                                                                                                                                                                                                                                                                                                                                              | Cardiac Toxicity                                                                                                                                                                                                                                                                                                                                                                                                                                                                                                                                                                                                                                                                                                                                                                                                                                                                                                                                                                                                                                                                                                                                                                                                                                                                                                                                                                                                                                                                                                                                                                                                                                                                                                                                                                                     | Cardiac Toxicity                                                                                                                                                                                                                                                                                                                                                                                                                                                                                                                                                                                                                                                                                                                                                                                                                                                                                                                                                                                                                                                                                                                                                                                                                                                                                                                                                                                                                                                                                                                                                                                                                                                                                                                                                                                                                                                                                                                                                                                                                                                                                                                  |
|------------------------|-----------------------------------------------------------------------------------------------------------------------------------------------------------------------------------------------------------------------------------------------------------------------------------------------------------------------------------------------------------------------------------------------------------------------------------------------------------------------------------------------------------------------------------------------------------------------------------------------------------------------------------------------------------------------------------------------------------------------------------------------------------------------------------------------------------------------------------------------------------------------------------------------------------------------------------------------------------------------------------------------------------------------------------------------------------------------------------------------------------------------------------------------------------------------------------------------------------------------------------------------------------------------------------------------------------------------------------------------------------------------------------------------------------------------------------------------------------------------------------------------------------------------------------------------------------------------------------------------------------------------|------------------------------------------------------------------------------------------------------------------------------------------------------------------------------------------------------------------------------------------------------------------------------------------------------------------------------------------------------------------------------------------------------------------------------------------------------------------------------------------------------------------------------------------------------------------------------------------------------------------------------------------------------------------------------------------------------------------------------------------------------------------------------------------------------------------------------------------------------------------------------------------------------------------------------------------------------------------------------------------------------------------------------------------------------------------------------------------------------------------------------------------------------------------------------------------------------------------------------------------------------------------------------------------------------------------------------------------------------------------------------------------------------------------------------------------------------------------------------------------------------------------------------------------------------------------------------------------------------------------------------------------------------------------------------------------------------------------------------------------------------------------------------------------------------------------------------------------------|-----------------------------------------------------------------------------------------------------------------------------------------------------------------------------------------------------------------------------------------------------------------------------------------------------------------------------------------------------------------------------------------------------------------------------------------------------------------------------------------------------------------------------------------------------------------------------------------------------------------------------------------------------------------------------------------------------------------------------------------------------------------------------------------------------------------------------------------------------------------------------------------------------------------------------------------------------------------------------------------------------------------------------------------------------------------------------------------------------------------------------------------------------------------------------------------------------------------------------------------------------------------------------------------------------------------------------------------------------------------------------------------------------------------------------------------------------------------------------------------------------------------------------------------------------------------------------------------------------------------------------------------------------------------------------------------------|------------------------------------------------------------------------------------------------------------------------------------------------------------------------------------------------------------------------------------------------------------------------------------------------------------------------------------------------------------------------------------------------------------------------------------------------------------------------------------------------------------------------------------------------------------------------------------------------------------------------------------------------------------------------------------------------------------------------------------------------------------------------------------------------------------------------------------------------------------------------------------------------------------------------------------------------------------------------------------------------------------------------------------------------------------------------------------------------------------------------------------------------------------------------------------------------------------------------------------------------------------------------------------------------------------------------------------------------------------------------------------------------------------------------------------------------------------------------------------------------------------------------------------------------------------------------------------------------------------------------------------------------------------------------------------------------------------------------------------------------------------------------------------------------------|-----------------------------------------------------------------------------------------------------------------------------------------------------------------------------------------------------------------------------------------------------------------------------------------------------------------------------------------------------------------------------------------------------------------------------------------------------------------------------------------------------------------------------------------------------------------------------------------------------------------------------------------------------------------------------------------------------------------------------------------------------------------------------------------------------------------------------------------------------------------------------------------------------------------------------------------------------------------------------------------------------------------------------------------------------------------------------------------------------------------------------------------------------------------------------------------------------------------------------------------------------------------------------------------------------------------------------------------------------------------------------------------------------------------------------------------------------------------------------------------------------------------------------------------------------------------------------------------------------------------------------------------------------------------------------------------------------------------------------------------------------------------------------------------------------------------------------------------------------------------------------------------------------------------------------------------------------------------------------------------------------------------------------------------------------------------------------------------------------------------------------------|
| Question               | What initial screening tests should be ordered if immune checkpoint inhibitor associated myocarditis is suspected?                                                                                                                                                                                                                                                                                                                                                                                                                                                                                                                                                                                                                                                                                                                                                                                                                                                                                                                                                                                                                                                                                                                                                                                                                                                                                                                                                                                                                                                                                                    | What are the life threatening consequences of immune checkpoint inhibitor associated myocarditis?                                                                                                                                                                                                                                                                                                                                                                                                                                                                                                                                                                                                                                                                                                                                                                                                                                                                                                                                                                                                                                                                                                                                                                                                                                                                                                                                                                                                                                                                                                                                                                                                                                                                                                                                              | What are the primary treatments for immune checkpoint inhibitor associated myocarditis?                                                                                                                                                                                                                                                                                                                                                                                                                                                                                                                                                                                                                                                                                                                                                                                                                                                                                                                                                                                                                                                                                                                                                                                                                                                                                                                                                                                                                                                                                                                                                                                                       | What supportive management strategies should be undertaken when immune checkpoint inhibitor associated myocarditis is suspected?                                                                                                                                                                                                                                                                                                                                                                                                                                                                                                                                                                                                                                                                                                                                                                                                                                                                                                                                                                                                                                                                                                                                                                                                                                                                                                                                                                                                                                                                                                                                                                                                                                                                     | What are other potential cardiovascular toxicities from immune checkpoint inhibitors other than myocarditis?                                                                                                                                                                                                                                                                                                                                                                                                                                                                                                                                                                                                                                                                                                                                                                                                                                                                                                                                                                                                                                                                                                                                                                                                                                                                                                                                                                                                                                                                                                                                                                                                                                                                                                                                                                                                                                                                                                                                                                                                                      |
| Answer Engine 2 (Bard) | <p>If immune checkpoint inhibitor (ICI)-associated myocarditis is suspected, the following initial screening tests should be ordered:</p> <p><b>***Electrocardiogram (EKG)**:</b> An EKG is a non-invasive test that measures the electrical activity of the heart. It can be used to detect abnormalities in the heart rhythm and heart rate.</p> <p><b>***Troponin**:</b> Troponin is a protein that is released into the bloodstream when the heart muscle is damaged. A troponin test can be used to detect myocardial injury.</p> <p><b>***NT-proBNP**:</b> NT-proBNP is a hormone that is released from the heart when it is under stress. A NT-proBNP test can be used to detect heart failure.</p> <p>Other tests that may be ordered include:</p> <p><b>***Echocardiogram**:</b> An echocardiogram is a non-invasive imaging test that uses ultrasound to produce images of the heart. It can be used to assess the heart's structure and function.</p> <p><b>***Cardiac magnetic resonance (CMR)**:</b> CMR is a non-invasive imaging test that uses powerful magnets and radio waves to produce detailed images of the heart. It is the most sensitive test for diagnosing myocarditis.</p> <p><b>***Endomyocardial biopsy**:</b> An endomyocardial biopsy is a minimally invasive procedure in which a small sample of heart muscle is removed and examined under a microscope. It is the definitive test for diagnosing myocarditis.</p> <p>The specific tests that are ordered will depend on the patient's clinical presentation and the physician's judgment.</p> <p>It is important to note that</p> | <p>Immune checkpoint inhibitor (ICI)-associated myocarditis is a rare but serious complication of ICI therapy. It is characterized by inflammation of the heart muscle, which can lead to a number of life-threatening consequences, including:</p> <p><b>***Cardiomyopathy**:</b> Cardiomyopathy is a condition in which the heart muscle is weakened and cannot pump blood as effectively as it should. This can lead to heart failure, which is a life-threatening condition in which the heart cannot pump enough blood to meet the body's needs.</p> <p><b>***Heart failure**:</b> Heart failure is a condition in which the heart cannot pump enough blood to meet the body's needs. This can lead to a number of complications, including shortness of breath, fatigue, swelling in the legs and feet, and fluid accumulation in the lungs. In severe cases, heart failure can lead to death.</p> <p><b>***Arrhythmias**:</b> Arrhythmias are abnormal heart rhythms that can be life-threatening. ICI-associated myocarditis can increase the risk of a number of arrhythmias, including atrial fibrillation, ventricular tachycardia, and ventricular fibrillation.</p> <p><b>***Cardiogenic shock**:</b> Cardiogenic shock is a life-threatening condition in which the heart is unable to pump enough blood to meet the body's needs. This can lead to low blood pressure, organ failure, and death.</p> <p>In addition to these life-threatening consequences, ICI-associated myocarditis can also lead to a number of other serious complications, such as:</p> <p><b>***Pericarditis**:</b> Pericarditis is an inflammation of the pericardium, the sac that surrounds the heart. Pericarditis can cause chest pain, shortness of breath, and palpitations.</p> <p><b>***Endocarditis**:</b> Endocarditis is an infection of</p> | <p>The primary treatments for immune checkpoint inhibitor (ICI)-associated myocarditis are:</p> <p><b>***High-dose corticosteroids**:</b> Corticosteroids are powerful anti-inflammatory drugs that can help to suppress the autoimmune response that is causing the myocarditis.</p> <p><b>***Immunosuppressive drugs**:</b> Immunosuppressive drugs are medications that weaken the immune system. They may be used in addition to corticosteroids or in patients who do not respond to corticosteroids. Some common immunosuppressive drugs used to treat ICI-associated myocarditis include azathioprine, mycophenolate mofetil, and cyclosporine.</p> <p><b>***Intravenous immunoglobulin (IVIg)**:</b> IVIg is a blood product that contains antibodies from healthy people. It may be used in patients who do not respond to corticosteroids or immunosuppressive drugs.</p> <p><b>***Plasma exchange**:</b> Plasma exchange is a procedure in which the patient's blood is filtered to remove harmful antibodies. It may be used in patients who do not respond to other treatments.</p> <p>In some cases, patients with ICI-associated myocarditis may also need supportive care, such as mechanical ventilation and medications to control heart failure.</p> <p>The specific treatment plan that is right for a patient with ICI-associated myocarditis will depend on the severity of the myocarditis, the patient's other medical conditions, and the patient's response to treatment.</p> <p>It is important to note that ICI-associated myocarditis can be a serious condition, and early diagnosis and treatment are essential to prevent life-threatening complications.</p> | <p>The following supportive management strategies should be undertaken when immune checkpoint inhibitor (ICI)-associated myocarditis is suspected:</p> <p><b>***Close monitoring**:</b> Patients with suspected ICI-associated myocarditis should be closely monitored for signs and symptoms of worsening heart failure, including shortness of breath, fatigue, swelling in the legs and feet, and fluid accumulation in the lungs.</p> <p><b>***Vital sign monitoring**:</b> This includes monitoring the patient's heart rate, blood pressure, respiratory rate, and temperature.</p> <p><b>***Oxygen therapy**:</b> Oxygen therapy may be needed if the patient has low blood oxygen levels.</p> <p><b>***Intravenous fluids**:</b> Intravenous fluids may be needed to maintain hydration and electrolyte balance.</p> <p><b>***Diuretics**:</b> Diuretics are medications that help to remove excess fluid from the body. They may be used to treat heart failure and fluid accumulation in the lungs.</p> <p><b>***Inotropic medications**:</b> Inotropic medications are medications that strengthen the heart muscle and improve its pumping function. They may be used to treat heart failure.</p> <p><b>***Vasopressors**:</b> Vasopressors are medications that increase blood pressure. They may be used to treat cardiogenic shock.</p> <p>In addition to these supportive measures, patients with suspected ICI-associated myocarditis should also start treatment with high-dose corticosteroids and/or immunosuppressive drugs as soon as possible.</p> <p>It is important to note that ICI-associated myocarditis can be a serious condition, and early diagnosis and treatment are essential to prevent life-threatening complications.</p> <p>Here are some additional tips</p> | <p>Other potential cardiovascular toxicities from immune checkpoint inhibitors (ICIs) other than myocarditis include:</p> <p><b>***Pericarditis**:</b> Pericarditis is inflammation of the pericardium, the sac that surrounds the heart. Pericarditis can cause chest pain, shortness of breath, and palpitations.</p> <p><b>***Heart failure**:</b> Heart failure is a condition in which the heart cannot pump enough blood to meet the body's needs. ICI-associated heart failure can be caused by a number of factors, including myocarditis, pericarditis, and coronary artery vasculitis.</p> <p><b>***Arrhythmias**:</b> Arrhythmias are abnormal heart rhythms. ICI-associated arrhythmias can include atrial fibrillation, ventricular tachycardia, and ventricular fibrillation.</p> <p><b>***Coronary artery vasculitis**:</b> Coronary artery vasculitis is inflammation of the coronary arteries, the arteries that supply blood to the heart muscle. Coronary artery vasculitis can lead to coronary artery spasm, angina, and myocardial infarction (heart attack).</p> <p><b>***Hypertension**:</b> Hypertension is high blood pressure. ICI-associated hypertension is thought to be caused by a combination of factors, including inflammation, endothelial dysfunction, and activation of the renin-angiotensin-aldosterone system.</p> <p>ICI-associated cardiovascular toxicities can be mild or severe. In some cases, they can be life-threatening. It is important to be aware of the potential cardiovascular toxicities of ICIs so that they can be diagnosed and treated promptly.</p> <p>Here are some additional tips for managing patients at risk for ICI-associated cardiovascular toxicities:</p> <p><b>***Educate patients about the signs and symptoms of ICI-associated cardiovascular toxicities**:</b> Advise patients to seek medical attention promptly if they experience any of the following symptoms: chest pain, shortness of breath, palpitations, edema (swelling) in the legs and feet, and fatigue.</p> <p><b>***Monitor patients for cardiovascular toxicities**:</b> This</p> |

|  |                                                                                                                                                                                       |                                                                                                                                                                                                                                                                                                                                                                                                                                                                                                                                                                                                          |  |                                                                                                                                                                                                                                                                                                                                                                                                                                                                                                                                                                                                                                                                                                                                                                                                  |                                                                                                                                                                                                                                                                                                                                                                                                                                                                                                                                                                                                                                    |
|--|---------------------------------------------------------------------------------------------------------------------------------------------------------------------------------------|----------------------------------------------------------------------------------------------------------------------------------------------------------------------------------------------------------------------------------------------------------------------------------------------------------------------------------------------------------------------------------------------------------------------------------------------------------------------------------------------------------------------------------------------------------------------------------------------------------|--|--------------------------------------------------------------------------------------------------------------------------------------------------------------------------------------------------------------------------------------------------------------------------------------------------------------------------------------------------------------------------------------------------------------------------------------------------------------------------------------------------------------------------------------------------------------------------------------------------------------------------------------------------------------------------------------------------------------------------------------------------------------------------------------------------|------------------------------------------------------------------------------------------------------------------------------------------------------------------------------------------------------------------------------------------------------------------------------------------------------------------------------------------------------------------------------------------------------------------------------------------------------------------------------------------------------------------------------------------------------------------------------------------------------------------------------------|
|  | <p>the diagnosis of ICI-associated myocarditis is based on a combination of clinical findings, imaging results, and endomyocardial biopsy findings. No single test is diagnostic.</p> | <p>the inner lining of the heart. Endocarditis can cause a number of complications, including valvular heart disease, heart failure, and stroke.</p> <p><b>***Myocardial infarction:**</b> Myocardial infarction, also known as a heart attack, occurs when blood flow to the heart muscle is blocked. This can damage or destroy the heart muscle and can lead to heart failure and death.</p> <p>It is important to note that ICI-associated myocarditis is a rare but serious complication of ICI therapy. Early diagnosis and treatment are essential to prevent life-threatening complications.</p> |  | <p>for managing patients with suspected ICI-associated myocarditis:</p> <p><b>***Provide a safe and comfortable environment.**</b> Patients with suspected ICI-associated myocarditis may be at risk for arrhythmias and heart failure. Make sure that their environment is free of hazards and that they have access to medical care if needed.</p> <p><b>***Educate the patient and their family about ICI-associated myocarditis.**</b> Explain the signs and symptoms of worsening heart failure and the importance of seeking medical attention promptly.</p> <p><b>***Provide support to the patient and their family.**</b> ICI-associated myocarditis can be a stressful experience for both the patient and their loved ones. Be available to answer questions and provide support.</p> | <p>may include performing regular blood pressure checks, electrocardiograms (EKGs), and echocardiograms.</p> <p><b>***Treat ICI-associated cardiovascular toxicities promptly.**</b> Treatment may include medications such as corticosteroids, immunosuppressive drugs, and diuretics. In some cases, patients may need to be hospitalized for supportive care.</p> <p>It is important to note that the risk of ICI-associated cardiovascular toxicities is relatively low. However, it is important to be aware of the potential risks and to monitor patients closely for any signs or symptoms of cardiovascular toxicity.</p> |
|--|---------------------------------------------------------------------------------------------------------------------------------------------------------------------------------------|----------------------------------------------------------------------------------------------------------------------------------------------------------------------------------------------------------------------------------------------------------------------------------------------------------------------------------------------------------------------------------------------------------------------------------------------------------------------------------------------------------------------------------------------------------------------------------------------------------|--|--------------------------------------------------------------------------------------------------------------------------------------------------------------------------------------------------------------------------------------------------------------------------------------------------------------------------------------------------------------------------------------------------------------------------------------------------------------------------------------------------------------------------------------------------------------------------------------------------------------------------------------------------------------------------------------------------------------------------------------------------------------------------------------------------|------------------------------------------------------------------------------------------------------------------------------------------------------------------------------------------------------------------------------------------------------------------------------------------------------------------------------------------------------------------------------------------------------------------------------------------------------------------------------------------------------------------------------------------------------------------------------------------------------------------------------------|

| Patient Specific Scenarios |                                                                                                                                                                                                                                                                                                                                                                                                                                                                                                                                                                                                                                                                                                                                                                                                                                                                                                                                                                                                                                                                                                                                                                                                                                                                                                                                                                                                               |                                                                                                                                                                                                                                                                                                                                                                                                                                                                                                                                                                                                                                                                                                                                                                                                                                                                                                                                                                                                                                                                                                                                                                                                                                                                                                                                                                                                                                                                                                                                                                                                       |                                                                                                                                                                                                                                                                                                                                                                                                                                                                                                                                                                                                                                                                                                                                                                                                                                                                                                                                                                                                                                                                                                                                                                                                                                                                                                                                                                                                                                                              |                                                                                                                                                                                                                                                                                                                                                                                                                                                                                                                                                                                                                                                                                                                                                                                                                                                                                                                                                                                                                                                                                                                                                                                                                                                                                                                                                                                                                                                                                                                                                                                                                                                                                     |  |
|----------------------------|---------------------------------------------------------------------------------------------------------------------------------------------------------------------------------------------------------------------------------------------------------------------------------------------------------------------------------------------------------------------------------------------------------------------------------------------------------------------------------------------------------------------------------------------------------------------------------------------------------------------------------------------------------------------------------------------------------------------------------------------------------------------------------------------------------------------------------------------------------------------------------------------------------------------------------------------------------------------------------------------------------------------------------------------------------------------------------------------------------------------------------------------------------------------------------------------------------------------------------------------------------------------------------------------------------------------------------------------------------------------------------------------------------------|-------------------------------------------------------------------------------------------------------------------------------------------------------------------------------------------------------------------------------------------------------------------------------------------------------------------------------------------------------------------------------------------------------------------------------------------------------------------------------------------------------------------------------------------------------------------------------------------------------------------------------------------------------------------------------------------------------------------------------------------------------------------------------------------------------------------------------------------------------------------------------------------------------------------------------------------------------------------------------------------------------------------------------------------------------------------------------------------------------------------------------------------------------------------------------------------------------------------------------------------------------------------------------------------------------------------------------------------------------------------------------------------------------------------------------------------------------------------------------------------------------------------------------------------------------------------------------------------------------|--------------------------------------------------------------------------------------------------------------------------------------------------------------------------------------------------------------------------------------------------------------------------------------------------------------------------------------------------------------------------------------------------------------------------------------------------------------------------------------------------------------------------------------------------------------------------------------------------------------------------------------------------------------------------------------------------------------------------------------------------------------------------------------------------------------------------------------------------------------------------------------------------------------------------------------------------------------------------------------------------------------------------------------------------------------------------------------------------------------------------------------------------------------------------------------------------------------------------------------------------------------------------------------------------------------------------------------------------------------------------------------------------------------------------------------------------------------|-------------------------------------------------------------------------------------------------------------------------------------------------------------------------------------------------------------------------------------------------------------------------------------------------------------------------------------------------------------------------------------------------------------------------------------------------------------------------------------------------------------------------------------------------------------------------------------------------------------------------------------------------------------------------------------------------------------------------------------------------------------------------------------------------------------------------------------------------------------------------------------------------------------------------------------------------------------------------------------------------------------------------------------------------------------------------------------------------------------------------------------------------------------------------------------------------------------------------------------------------------------------------------------------------------------------------------------------------------------------------------------------------------------------------------------------------------------------------------------------------------------------------------------------------------------------------------------------------------------------------------------------------------------------------------------|--|
| Question                   | ICI general - practical                                                                                                                                                                                                                                                                                                                                                                                                                                                                                                                                                                                                                                                                                                                                                                                                                                                                                                                                                                                                                                                                                                                                                                                                                                                                                                                                                                                       | ICI general - practical                                                                                                                                                                                                                                                                                                                                                                                                                                                                                                                                                                                                                                                                                                                                                                                                                                                                                                                                                                                                                                                                                                                                                                                                                                                                                                                                                                                                                                                                                                                                                                               | Colitis – practical                                                                                                                                                                                                                                                                                                                                                                                                                                                                                                                                                                                                                                                                                                                                                                                                                                                                                                                                                                                                                                                                                                                                                                                                                                                                                                                                                                                                                                          | Colitis – practical                                                                                                                                                                                                                                                                                                                                                                                                                                                                                                                                                                                                                                                                                                                                                                                                                                                                                                                                                                                                                                                                                                                                                                                                                                                                                                                                                                                                                                                                                                                                                                                                                                                                 |  |
|                            | My patient is a 65 year old with a history of a heart transplant and several episodes of acute rejection, now on prednisone and tacrolimus. They now have metastatic melanoma. Are they a candidate for immune checkpoint inhibitor therapy?                                                                                                                                                                                                                                                                                                                                                                                                                                                                                                                                                                                                                                                                                                                                                                                                                                                                                                                                                                                                                                                                                                                                                                  | My patient is a 77 year old with a history of rheumatoid arthritis on methotrexate and prednisone. They now have metastatic melanoma with liver and bone metastases. What are the pros and cons of different immune therapy options, specifically anti-PD-1 monotherapy vs. combination of ipilimumab and nivolumab?                                                                                                                                                                                                                                                                                                                                                                                                                                                                                                                                                                                                                                                                                                                                                                                                                                                                                                                                                                                                                                                                                                                                                                                                                                                                                  | 57 year old with MSI-high colorectal cancer on ipilimumab and nivolumab has come in with a total of 20 bowel movements over the last 2 days. Her labs are normal except for slightly low potassium (3.4). What is the best treatment for her?                                                                                                                                                                                                                                                                                                                                                                                                                                                                                                                                                                                                                                                                                                                                                                                                                                                                                                                                                                                                                                                                                                                                                                                                                | 62 year old with diarrhea following 3 doses of pembrolizumab given for metastatic non-small cell lung cancer had initial improvement from 8 bowel movements per day to 3, but has now worsened with increase to 8 bowel movements today. He is still on prednisone 1mg/kg. What is my next step in treatment?                                                                                                                                                                                                                                                                                                                                                                                                                                                                                                                                                                                                                                                                                                                                                                                                                                                                                                                                                                                                                                                                                                                                                                                                                                                                                                                                                                       |  |
| Answer Engine 1 (ChatGPT)  | <p>Treating metastatic melanoma in a patient with a history of organ transplantation, particularly a heart transplant, and a history of acute rejection episodes, is highly complex. Immune checkpoint inhibitors, such as CTLA-4, PD-1, and PD-L1 inhibitors, have revolutionized the treatment of metastatic melanoma by enhancing the body's immune response against tumor cells. However, these therapies can also lead to enhanced immune responses against transplanted organs, potentially resulting in graft rejection.</p> <p>Given your patient's history and current immunosuppressive regimen (prednisone and tacrolimus), the use of immune checkpoint inhibitors poses a significant risk. Immunosuppressive medications are used to reduce the activity of the patient's immune system to prevent organ rejection, while immune checkpoint inhibitors aim to boost the immune system to fight cancer, which could lead to an increased risk of transplant rejection.</p> <p>There have been case reports and studies discussing the use of immune checkpoint inhibitors in patients with solid organ transplants, but these are limited and often highlight the delicate balance between treating the cancer and preserving the function of the transplanted organ. In some cases, patients on these therapies have experienced organ rejection, which can be life-threatening, especially</p> | <p>For a 77-year-old patient with a history of rheumatoid arthritis (RA) on methotrexate and prednisone, and now diagnosed with metastatic melanoma with liver and bone metastases, the choice between anti-PD-1 monotherapy (e.g., pembrolizumab or nivolumab) and combination therapy with ipilimumab (a CTLA-4 inhibitor) and nivolumab (a PD-1 inhibitor) involves a careful consideration of various factors. Both treatment strategies have shown effectiveness in metastatic melanoma, but they differ significantly in their side effect profiles and potential impact on underlying conditions like RA.</p> <p>### Anti-PD-1 Monotherapy (e.g., Pembrolizumab, Nivolumab)</p> <p>**Pros:**</p> <ul style="list-style-type: none"> <li>- **Efficacy:** Anti-PD-1 agents have shown significant efficacy in the treatment of metastatic melanoma, improving overall survival and progression-free survival in many patients.</li> <li>- **Tolerability:** Generally, anti-PD-1 monotherapy is better tolerated than combination therapy, with a lower incidence of severe immune-related adverse events (irAEs).</li> <li>- **RA Consideration:** Monotherapy may pose a lesser risk of exacerbating autoimmune conditions like RA compared to combination therapy, although the risk of irAEs still exists.</li> </ul> <p>**Cons:**</p> <ul style="list-style-type: none"> <li>- **Limited Response in Some Patients:** While many patients respond well, others may have limited or no response to monotherapy, particularly in cases of high tumor burden or aggressive disease.</li> </ul> | <p>A 57-year-old patient with MSI-high (microsatellite instability-high) colorectal cancer on combination immunotherapy with ipilimumab (a CTLA-4 inhibitor) and nivolumab (a PD-1 inhibitor) who is experiencing a significant increase in bowel movements (20 over the last 2 days) is likely suffering from an immune-related adverse event (irAE), specifically colitis, which is a known side effect of this type of therapy. The slightly low potassium level (3.4) could be a result of the increased bowel movements. Immediate and appropriate management is crucial to prevent further complications and ensure patient safety.</p> <p>### Initial Management Steps:</p> <ol style="list-style-type: none"> <li>1. <b>Discontinue Immunotherapy:</b> Temporarily stopping the ipilimumab and nivolumab is usually the first step in managing severe irAEs to reduce immune system activation.</li> <li>2. <b>Hydration and Electrolyte Management:</b> Given the increased bowel movements and slightly low potassium, the patient will need intravenous fluids to maintain hydration and correct electrolyte imbalances.</li> <li>3. <b>Corticosteroids:</b> Initiate systemic corticosteroids, such as prednisone or methylprednisolone, to reduce inflammation. The dosage can be significant, such as 1-2 mg/kg of prednisone equivalent, depending on the severity of the symptoms.</li> <li>4. <b>Symptom Management:</b> Provide</li> </ol> | <p>In a 62-year-old patient with metastatic non-small cell lung cancer (NSCLC) who has developed diarrhea following treatment with pembrolizumab (an anti-PD-1 therapy), and whose condition initially improved on prednisone 1 mg/kg from 8 bowel movements per day to 3 but has since worsened back to 8 bowel movements per day, the worsening of symptoms despite being on high-dose corticosteroids suggests a severe grade of immune-related colitis or an inadequate response to corticosteroids. Here's how you can proceed:</p> <p>### Immediate Steps:</p> <ol style="list-style-type: none"> <li>1. <b>Assessment and Supportive Care:</b> <ul style="list-style-type: none"> <li>- Conduct a thorough assessment to rule out infectious causes of diarrhea, as infections can exacerbate or mimic the symptoms of immune-related colitis.</li> <li>- Ensure the patient is adequately hydrated and manage electrolyte imbalances. Hospitalization may be necessary for intravenous fluids and closer monitoring, especially if there's concern for dehydration or other complications.</li> </ul> </li> <li>2. <b>Modify Corticosteroid Therapy:</b> <ul style="list-style-type: none"> <li>- Confirm that the patient is adhering to the prescribed prednisone regimen and assess whether the current dose is adequate.</li> <li>- In cases where symptoms persist or worsen despite high-dose corticosteroids for several days, consider increasing the corticosteroid dose temporarily.</li> </ul> </li> <li>3. <b>Advanced Immunomodulatory Therapy:</b> <ul style="list-style-type: none"> <li>- If there's no significant improvement with</li> </ul> </li> </ol> |  |

|                                                                                                                                                                                                                                                                                                                                                                                                                                                                                                                                                                                                                                                                                                                                                                                                                                                                                                                                                                                                                                                                                                                                                                                                                                                                                                         |                                                                                                                                                                                                                                                                                                                                                                                                                                                                                                                                                                                                                                                                                                                                                                                                                                                                                                                                                                                                                                                                                                                                                                                                                                                                                                                                                                                                                                                                                                                                                                                                                                                                                                                                                                                                                                                                                                                                                                                                                                                                                                                                          |                                                                                                                                                                                                                                                                                                                                                                                                                                                                                                                                                                                                                                                                                                                                                                                                                                                                                                                                                                                                                                                                                                                                                                                                                                                                                                                                                                                                                                                                                                                                                                                                                                                                                                                                                                                                                                                                   |                                                                                                                                                                                                                                                                                                                                                                                                                                                                                                                                                                                                                                                                                                                                                                                                                                                                                                                                                                                                                                                                                                                                                                                                                                                                                                                                                                                                                                                                                                                                                                                                                                                                                                                                                                                                                                                                                                                                                                                                                              |  |
|---------------------------------------------------------------------------------------------------------------------------------------------------------------------------------------------------------------------------------------------------------------------------------------------------------------------------------------------------------------------------------------------------------------------------------------------------------------------------------------------------------------------------------------------------------------------------------------------------------------------------------------------------------------------------------------------------------------------------------------------------------------------------------------------------------------------------------------------------------------------------------------------------------------------------------------------------------------------------------------------------------------------------------------------------------------------------------------------------------------------------------------------------------------------------------------------------------------------------------------------------------------------------------------------------------|------------------------------------------------------------------------------------------------------------------------------------------------------------------------------------------------------------------------------------------------------------------------------------------------------------------------------------------------------------------------------------------------------------------------------------------------------------------------------------------------------------------------------------------------------------------------------------------------------------------------------------------------------------------------------------------------------------------------------------------------------------------------------------------------------------------------------------------------------------------------------------------------------------------------------------------------------------------------------------------------------------------------------------------------------------------------------------------------------------------------------------------------------------------------------------------------------------------------------------------------------------------------------------------------------------------------------------------------------------------------------------------------------------------------------------------------------------------------------------------------------------------------------------------------------------------------------------------------------------------------------------------------------------------------------------------------------------------------------------------------------------------------------------------------------------------------------------------------------------------------------------------------------------------------------------------------------------------------------------------------------------------------------------------------------------------------------------------------------------------------------------------|-------------------------------------------------------------------------------------------------------------------------------------------------------------------------------------------------------------------------------------------------------------------------------------------------------------------------------------------------------------------------------------------------------------------------------------------------------------------------------------------------------------------------------------------------------------------------------------------------------------------------------------------------------------------------------------------------------------------------------------------------------------------------------------------------------------------------------------------------------------------------------------------------------------------------------------------------------------------------------------------------------------------------------------------------------------------------------------------------------------------------------------------------------------------------------------------------------------------------------------------------------------------------------------------------------------------------------------------------------------------------------------------------------------------------------------------------------------------------------------------------------------------------------------------------------------------------------------------------------------------------------------------------------------------------------------------------------------------------------------------------------------------------------------------------------------------------------------------------------------------|------------------------------------------------------------------------------------------------------------------------------------------------------------------------------------------------------------------------------------------------------------------------------------------------------------------------------------------------------------------------------------------------------------------------------------------------------------------------------------------------------------------------------------------------------------------------------------------------------------------------------------------------------------------------------------------------------------------------------------------------------------------------------------------------------------------------------------------------------------------------------------------------------------------------------------------------------------------------------------------------------------------------------------------------------------------------------------------------------------------------------------------------------------------------------------------------------------------------------------------------------------------------------------------------------------------------------------------------------------------------------------------------------------------------------------------------------------------------------------------------------------------------------------------------------------------------------------------------------------------------------------------------------------------------------------------------------------------------------------------------------------------------------------------------------------------------------------------------------------------------------------------------------------------------------------------------------------------------------------------------------------------------------|--|
| <p>in the context of a heart transplant.</p> <p>In your patient's case, a multidisciplinary approach involving oncologists, transplant specialists, and other healthcare professionals is crucial to thoroughly assess the potential benefits and risks. The decision to proceed with immune checkpoint inhibitor therapy would need to be highly individualized, considering factors such as:</p> <ul style="list-style-type: none"> <li>- The urgency and aggressiveness of the melanoma</li> <li>- The stability and function of the transplanted heart</li> <li>- The patient's overall health status and potential for tolerating treatment-related adverse effects</li> <li>- Available alternative therapies for the melanoma that might pose less risk to the transplanted organ</li> </ul> <p>It's also essential to have detailed discussions with the patient regarding the potential risks and benefits of such treatment, including the possibility of transplant rejection and the need for close monitoring.</p> <p>Given the complexity of your patient's case, consulting the latest clinical guidelines and potentially seeking advice from centers with experience in treating cancer in transplant recipients could provide additional insights into the best course of action.</p> | <p>- <b>**Risk of Immune-Related Adverse Events:**</b> Despite a better safety profile than combination therapy, monotherapy can still lead to irAEs, potentially affecting any organ system, including exacerbation of RA.</p> <p><b>### Combination Therapy (Ipilimumab + Nivolumab)</b></p> <p><b>**Pros:**</b></p> <ul style="list-style-type: none"> <li>- <b>**Higher Response Rates:**</b> Combination therapy has been shown to result in higher response rates and longer duration of response in some patient populations compared to monotherapy, potentially offering a greater chance of significant tumor reduction.</li> <li>- <b>**Synergistic Mechanism:**</b> The combination targets two different checkpoints (CTLA-4 and PD-1), which may provide a more robust activation of the immune system against tumor cells.</li> </ul> <p><b>**Cons:**</b></p> <ul style="list-style-type: none"> <li>- <b>**Increased Toxicity:**</b> The risk of severe irAEs is significantly higher with combination therapy, which can lead to serious complications and may require discontinuation of treatment.</li> <li>- <b>**Management of RA:**</b> The increased immune response with combination therapy could potentially exacerbate RA or other autoimmune conditions, requiring more intensive management of these conditions.</li> <li>- <b>**Elderly Patients:**</b> The increased risk of adverse events may be of particular concern in elderly patients, like your 77-year-old patient, who may have a reduced capacity to tolerate severe side effects.</li> </ul> <p><b>### Additional Considerations</b></p> <ul style="list-style-type: none"> <li>- <b>**Patient's Performance Status:**</b> The overall health and performance status of the patient can significantly influence treatment choice. Patients with a lower performance status may not tolerate the increased toxicity of combination therapy.</li> <li>- <b>**Underlying Autoimmune Disease:**</b> The presence of RA, especially if it's active or poorly controlled, increases the complexity of using immune checkpoint inhibitors</li> </ul> | <p>supportive care to manage symptoms, including antidiarrheal medications if appropriate and not contraindicated.</p> <p>5. <b>**Gastroenterology Consultation:**</b> Involve a gastroenterologist for further evaluation, including the potential need for a colonoscopy to assess the extent of colitis and to rule out other causes of diarrhea.</p> <p><b>### If Symptoms Do Not Improve:</b></p> <ul style="list-style-type: none"> <li>- <b>**Advanced Therapies:**</b> If there is no improvement with corticosteroids within a few days or the symptoms are severe, infliximab (a TNF-alpha inhibitor) or vedolizumab (an integrin receptor antagonist) may be considered. These medications can be effective in treating steroid-refractory irAE colitis.</li> <li>- <b>**Hospitalization:**</b> Patients with severe symptoms or complications may require hospitalization for closer monitoring and management.</li> </ul> <p><b>### Monitoring and Follow-Up:</b></p> <ul style="list-style-type: none"> <li>- <b>**Close Monitoring:**</b> Regular monitoring of symptoms, lab values (including electrolytes), and overall health status is crucial during treatment.</li> <li>- <b>**Re-evaluation for Immunotherapy:**</b> Re-introducing immunotherapy should be carefully considered and generally avoided until complete resolution of colitis. The decision to rechallenge with immunotherapy, particularly with both agents, should be made with caution and involves a risk-benefit assessment.</li> <li>- <b>**Patient Education:**</b> Educate the patient on the importance of promptly reporting any new or worsening symptoms, as early intervention can prevent more severe complications.</li> </ul> <p>Given the complexity of managing irAEs, particularly in the context of advanced cancer and combination immunotherapy, a</p> | <p>corticosteroids, or if symptoms are severe, consider introducing an advanced immunomodulatory agent such as infliximab (a TNF-<math>\alpha</math> inhibitor) or vedolizumab (an <math>\alpha</math>4<math>\beta</math>7 integrin blocker). Infliximab is often used for steroid-refractory colitis, but it should be avoided if there's a suspicion of an infectious process until infections are adequately ruled out or treated.</p> <p>4. <b>**Gastroenterology Consultation:**</b></p> <ul style="list-style-type: none"> <li>- Involve a gastroenterologist for further evaluation, which may include endoscopic assessment to confirm the diagnosis and assess the severity of colitis. This can also help in ruling out other potential causes of diarrhea.</li> </ul> <p>5. <b>**Discontinue Immunotherapy:**</b></p> <ul style="list-style-type: none"> <li>- Given the severe immune-related adverse event, pembrolizumab should be held until a complete resolution of symptoms. The decision to rechallenge with pembrolizumab in the future should be made with caution and involves a thorough risk-benefit analysis.</li> </ul> <p><b>### Monitoring and Follow-Up:</b></p> <ul style="list-style-type: none"> <li>- <b>**Close Monitoring:**</b> Regularly assess the patient's response to treatment, including symptom improvement and potential side effects of the immunomodulatory agents.</li> <li>- <b>**Tapering Corticosteroids:**</b> Once symptoms are controlled, gradually taper the corticosteroids to avoid potential withdrawal symptoms and minimize long-term side effects. This taper should be conducted slowly and under close supervision.</li> <li>- <b>**Long-term Management:**</b> Patients who have experienced severe irAEs require long-term follow-up to manage and monitor for potential late-onset complications or recurrences of symptoms.</li> </ul> <p>Managing severe immune-related adverse events such as colitis requires a careful and coordinated approach,</p> |  |
|---------------------------------------------------------------------------------------------------------------------------------------------------------------------------------------------------------------------------------------------------------------------------------------------------------------------------------------------------------------------------------------------------------------------------------------------------------------------------------------------------------------------------------------------------------------------------------------------------------------------------------------------------------------------------------------------------------------------------------------------------------------------------------------------------------------------------------------------------------------------------------------------------------------------------------------------------------------------------------------------------------------------------------------------------------------------------------------------------------------------------------------------------------------------------------------------------------------------------------------------------------------------------------------------------------|------------------------------------------------------------------------------------------------------------------------------------------------------------------------------------------------------------------------------------------------------------------------------------------------------------------------------------------------------------------------------------------------------------------------------------------------------------------------------------------------------------------------------------------------------------------------------------------------------------------------------------------------------------------------------------------------------------------------------------------------------------------------------------------------------------------------------------------------------------------------------------------------------------------------------------------------------------------------------------------------------------------------------------------------------------------------------------------------------------------------------------------------------------------------------------------------------------------------------------------------------------------------------------------------------------------------------------------------------------------------------------------------------------------------------------------------------------------------------------------------------------------------------------------------------------------------------------------------------------------------------------------------------------------------------------------------------------------------------------------------------------------------------------------------------------------------------------------------------------------------------------------------------------------------------------------------------------------------------------------------------------------------------------------------------------------------------------------------------------------------------------------|-------------------------------------------------------------------------------------------------------------------------------------------------------------------------------------------------------------------------------------------------------------------------------------------------------------------------------------------------------------------------------------------------------------------------------------------------------------------------------------------------------------------------------------------------------------------------------------------------------------------------------------------------------------------------------------------------------------------------------------------------------------------------------------------------------------------------------------------------------------------------------------------------------------------------------------------------------------------------------------------------------------------------------------------------------------------------------------------------------------------------------------------------------------------------------------------------------------------------------------------------------------------------------------------------------------------------------------------------------------------------------------------------------------------------------------------------------------------------------------------------------------------------------------------------------------------------------------------------------------------------------------------------------------------------------------------------------------------------------------------------------------------------------------------------------------------------------------------------------------------|------------------------------------------------------------------------------------------------------------------------------------------------------------------------------------------------------------------------------------------------------------------------------------------------------------------------------------------------------------------------------------------------------------------------------------------------------------------------------------------------------------------------------------------------------------------------------------------------------------------------------------------------------------------------------------------------------------------------------------------------------------------------------------------------------------------------------------------------------------------------------------------------------------------------------------------------------------------------------------------------------------------------------------------------------------------------------------------------------------------------------------------------------------------------------------------------------------------------------------------------------------------------------------------------------------------------------------------------------------------------------------------------------------------------------------------------------------------------------------------------------------------------------------------------------------------------------------------------------------------------------------------------------------------------------------------------------------------------------------------------------------------------------------------------------------------------------------------------------------------------------------------------------------------------------------------------------------------------------------------------------------------------------|--|

|  |  |                                                                                                                                                                                                                                                                                                                                                                                                                                                                                                                                                                                                                                                                                                                                                        |                                                                                                                                               |                                                                                                                                                                                                                                                               |  |
|--|--|--------------------------------------------------------------------------------------------------------------------------------------------------------------------------------------------------------------------------------------------------------------------------------------------------------------------------------------------------------------------------------------------------------------------------------------------------------------------------------------------------------------------------------------------------------------------------------------------------------------------------------------------------------------------------------------------------------------------------------------------------------|-----------------------------------------------------------------------------------------------------------------------------------------------|---------------------------------------------------------------------------------------------------------------------------------------------------------------------------------------------------------------------------------------------------------------|--|
|  |  | <p>due to the risk of exacerbating the autoimmune condition.</p> <p>- <b>Monitoring and Management:</b> Regardless of the chosen therapy, close monitoring for irAEs is essential, and a plan for managing these, including the potential need for immunosuppressants, should be in place.</p> <p>Given the complexity of the situation, a multidisciplinary approach involving oncologists, rheumatologists, and potentially other specialists is crucial to tailor the treatment plan to the patient's specific needs, considering both the melanoma and RA. In some cases, consultation with a tertiary cancer center with experience in treating cancer patients with underlying autoimmune diseases may provide additional valuable insights.</p> | <p>multidisciplinary approach involving oncology, gastroenterology, and possibly other specialties is essential for optimal patient care.</p> | <p>often involving a multidisciplinary team including oncologists, gastroenterologists, and potentially infectious disease specialists. The patient's overall clinical status, response to therapy, and potential risks should guide treatment decisions.</p> |  |
|--|--|--------------------------------------------------------------------------------------------------------------------------------------------------------------------------------------------------------------------------------------------------------------------------------------------------------------------------------------------------------------------------------------------------------------------------------------------------------------------------------------------------------------------------------------------------------------------------------------------------------------------------------------------------------------------------------------------------------------------------------------------------------|-----------------------------------------------------------------------------------------------------------------------------------------------|---------------------------------------------------------------------------------------------------------------------------------------------------------------------------------------------------------------------------------------------------------------|--|

|                           | Hepatitis – practical                                                                                                                                                                                                                                                                                                                                                                                                                                                                                                                                                                                                                                                                                                                                                                                                                                                                                                                                                                                                                                                                                                                                                                                                                                                                                                                                                                                                                                                                                                         | Hepatitis – practical                                                                                                                                                                                                                                                                                                                                                                                                                                                                                                                                                                                                                                                                                                                                                                                                                                                                                                                                                                                                                                                                                                                                                                                                                                                                                                                                                                                                                                                                                                                                                                                                                                                                                | Pneumonitis – practical                                                                                                                                                                                                                                                                                                                                                                                                                                                                                                                                                                                                                                                                                                                                                                                                                                                                                                                                                                                                                                                                                                                                                                                                                                                                                                                                                                                                                                                                                                                                                                                                                   | Pneumonitis - practical                                                                                                                                                                                                                                                                                                                                                                                                                                                                                                                                                                                                                                                                                                                                                                                                                                                                                                                                                                                                                                                                                                                                                                                                                                                                                                                                                                                                                                                                                                                                                                                                                                  |  |
|---------------------------|-------------------------------------------------------------------------------------------------------------------------------------------------------------------------------------------------------------------------------------------------------------------------------------------------------------------------------------------------------------------------------------------------------------------------------------------------------------------------------------------------------------------------------------------------------------------------------------------------------------------------------------------------------------------------------------------------------------------------------------------------------------------------------------------------------------------------------------------------------------------------------------------------------------------------------------------------------------------------------------------------------------------------------------------------------------------------------------------------------------------------------------------------------------------------------------------------------------------------------------------------------------------------------------------------------------------------------------------------------------------------------------------------------------------------------------------------------------------------------------------------------------------------------|------------------------------------------------------------------------------------------------------------------------------------------------------------------------------------------------------------------------------------------------------------------------------------------------------------------------------------------------------------------------------------------------------------------------------------------------------------------------------------------------------------------------------------------------------------------------------------------------------------------------------------------------------------------------------------------------------------------------------------------------------------------------------------------------------------------------------------------------------------------------------------------------------------------------------------------------------------------------------------------------------------------------------------------------------------------------------------------------------------------------------------------------------------------------------------------------------------------------------------------------------------------------------------------------------------------------------------------------------------------------------------------------------------------------------------------------------------------------------------------------------------------------------------------------------------------------------------------------------------------------------------------------------------------------------------------------------|-------------------------------------------------------------------------------------------------------------------------------------------------------------------------------------------------------------------------------------------------------------------------------------------------------------------------------------------------------------------------------------------------------------------------------------------------------------------------------------------------------------------------------------------------------------------------------------------------------------------------------------------------------------------------------------------------------------------------------------------------------------------------------------------------------------------------------------------------------------------------------------------------------------------------------------------------------------------------------------------------------------------------------------------------------------------------------------------------------------------------------------------------------------------------------------------------------------------------------------------------------------------------------------------------------------------------------------------------------------------------------------------------------------------------------------------------------------------------------------------------------------------------------------------------------------------------------------------------------------------------------------------|----------------------------------------------------------------------------------------------------------------------------------------------------------------------------------------------------------------------------------------------------------------------------------------------------------------------------------------------------------------------------------------------------------------------------------------------------------------------------------------------------------------------------------------------------------------------------------------------------------------------------------------------------------------------------------------------------------------------------------------------------------------------------------------------------------------------------------------------------------------------------------------------------------------------------------------------------------------------------------------------------------------------------------------------------------------------------------------------------------------------------------------------------------------------------------------------------------------------------------------------------------------------------------------------------------------------------------------------------------------------------------------------------------------------------------------------------------------------------------------------------------------------------------------------------------------------------------------------------------------------------------------------------------|--|
| Question                  | 42 year old who has received 2 doses of ipilimumab and nivolumab for metastatic melanoma now has increase in liver function tests (AST 420 with normal <45; ALT 475 with normal <45). Bilirubin, alkaline phosphatase, and other labs are normal, and the patient is asymptomatic. What is the treatment?                                                                                                                                                                                                                                                                                                                                                                                                                                                                                                                                                                                                                                                                                                                                                                                                                                                                                                                                                                                                                                                                                                                                                                                                                     | The patient had no improvement in 3 days with prednisone 1mg/kg. What is the next step?                                                                                                                                                                                                                                                                                                                                                                                                                                                                                                                                                                                                                                                                                                                                                                                                                                                                                                                                                                                                                                                                                                                                                                                                                                                                                                                                                                                                                                                                                                                                                                                                              | 68 year old with metastatic non-small cell lung cancer who has received 5 doses of pembrolizumab presents with dry cough and shortness of breath for the last 5 days. Chest x-ray shows diffuse bilateral opacities, new from prior. Oxygen saturation is 87% (from a baseline of 98%). What is the most likely diagnosis?                                                                                                                                                                                                                                                                                                                                                                                                                                                                                                                                                                                                                                                                                                                                                                                                                                                                                                                                                                                                                                                                                                                                                                                                                                                                                                                | For the patient in the prior scenario, what is the best treatment?                                                                                                                                                                                                                                                                                                                                                                                                                                                                                                                                                                                                                                                                                                                                                                                                                                                                                                                                                                                                                                                                                                                                                                                                                                                                                                                                                                                                                                                                                                                                                                                       |  |
| Answer Engine 1 (ChatGPT) | <p>An asymptomatic 42-year-old patient with metastatic melanoma who has received two doses of ipilimumab (a CTLA-4 inhibitor) and nivolumab (a PD-1 inhibitor) and now presents with significantly elevated liver enzymes (AST and ALT) but normal bilirubin, alkaline phosphatase, and other lab values, is likely experiencing an immune-related hepatotoxicity, also known as immune-mediated hepatitis. This is a recognized side effect of both ipilimumab and nivolumab, with the combination therapy having a higher incidence of hepatotoxicity than either agent alone.</p> <p>### Initial Treatment Approach:</p> <ol style="list-style-type: none"> <li><b>Hold Immunotherapy:</b> <ul style="list-style-type: none"> <li>Temporarily discontinue both ipilimumab and nivolumab until liver function tests (LFTs) normalize or significantly improve. This is a standard approach for grade 3 or higher hepatotoxicity, as per Common Terminology Criteria for Adverse Events (CTCAE).</li> </ul> </li> <li><b>Initiate Corticosteroids:</b> <ul style="list-style-type: none"> <li>Start systemic corticosteroids, such as prednisone or methylprednisolone, at a high dose (e.g., 1-2 mg/kg/day of prednisone equivalent). The goal is to reduce liver inflammation and prevent further damage.</li> </ul> </li> <li><b>Close Monitoring:</b> <ul style="list-style-type: none"> <li>Monitor LFTs closely (e.g., every 2-3 days) to assess response to corticosteroids and progression of</li> </ul> </li> </ol> | <p>If the patient with metastatic melanoma who has been treated with ipilimumab and nivolumab shows no improvement in liver function tests (LFTs) after 3 days of high-dose prednisone (1 mg/kg), it's essential to escalate the management. This situation indicates a severe or steroid-refractory immune-mediated hepatitis, which requires immediate and more aggressive treatment:</p> <p>### Immediate Next Steps:</p> <ol style="list-style-type: none"> <li><b>Increase Corticosteroid Dose:</b> <ul style="list-style-type: none"> <li>Consider increasing the corticosteroid dose, for instance, to methylprednisolone 2 mg/kg/day, especially if the patient was on oral prednisone, to ensure adequate treatment of the severe immune-mediated hepatitis.</li> </ul> </li> <li><b>Initiate Second-Line Therapy:</b> <ul style="list-style-type: none"> <li>If there's no response to the increased corticosteroid therapy or if the LFTs continue to worsen, initiate second-line immunosuppressive therapy. Mycophenolate mofetil (MMF) is commonly used for steroid-refractory cases. The typical starting dose is 1000 mg twice daily, which can be adjusted based on response and tolerability.</li> </ul> </li> <li><b>Consultation and Hospitalization:</b> <ul style="list-style-type: none"> <li>Hospitalization for close monitoring and treatment, if not already done, is highly recommended due to the risk of rapid progression to liver failure.</li> <li>Consult a hepatologist for expert management and to consider other potential treatments, including tacrolimus or infliximab (though infliximab is typically avoided in cases of hepatitis</li> </ul> </li> </ol> | <p>The presentation of a 68-year-old patient with metastatic non-small cell lung cancer (NSCLC), who has received five doses of pembrolizumab and is now experiencing a dry cough and shortness of breath for the last 5 days, accompanied by a drop in oxygen saturation from 98% to 87% and new diffuse bilateral opacities on chest X-ray, strongly suggests an immune-related adverse event (irAE) of pneumonitis.</p> <p>Pembrolizumab is a PD-1 inhibitor used in the treatment of various cancers, including NSCLC. While it can be effective against cancer, it can also cause the immune system to attack normal organs and tissues in the body, leading to irAEs. Pneumonitis, an inflammation of lung tissue, is a recognized irAE associated with PD-1 and PD-L1 inhibitors. The symptoms, radiographic changes, and the temporal association with pembrolizumab treatment in this patient point towards pembrolizumab-induced pneumonitis as the most likely diagnosis.</p> <p>### Key points supporting this diagnosis:</p> <ul style="list-style-type: none"> <li><b>Symptoms:</b> The dry cough and shortness of breath are typical symptoms of pneumonitis.</li> <li><b>Oxygen Saturation:</b> The significant drop in oxygen saturation indicates impaired gas exchange, which is consistent with pneumonitis.</li> <li><b>Radiographic Findings:</b> Diffuse bilateral opacities on chest X-ray, which are new compared to prior imaging, suggest a diffuse inflammatory process in the lungs.</li> <li><b>Temporal Relationship:</b> The onset of symptoms after several doses of pembrolizumab suggests a</li> </ul> | <p>For the 68-year-old patient with metastatic non-small cell lung cancer (NSCLC) who has developed suspected pembrolizumab-induced pneumonitis, evidenced by a dry cough, shortness of breath, a significant drop in oxygen saturation (from 98% to 87%), and new diffuse bilateral opacities on chest X-ray, the best treatment approach involves immediate and specific interventions:</p> <p>### Immediate Treatment Steps:</p> <ol style="list-style-type: none"> <li><b>Discontinue Pembrolizumab:</b> <ul style="list-style-type: none"> <li>Temporarily halt pembrolizumab treatment to prevent further immune stimulation.</li> </ul> </li> <li><b>Initiate Corticosteroids:</b> <ul style="list-style-type: none"> <li>Start systemic corticosteroids to reduce inflammation in the lungs. For moderate to severe pneumonitis (which this case appears to be, given the oxygen saturation of 87% and diffuse bilateral opacities), high-dose corticosteroids such as prednisone at 1-2 mg/kg/day or equivalent are recommended. In cases of severe respiratory compromise, intravenous methylprednisolone may be preferred.</li> </ul> </li> <li><b>Supportive Care:</b> <ul style="list-style-type: none"> <li>Provide supplemental oxygen to maintain oxygen saturation above 90%.</li> <li>Consider additional supportive measures as needed, based on the patient's symptoms and overall condition.</li> </ul> </li> </ol> <p>### Further Evaluation and Monitoring:</p> <ul style="list-style-type: none"> <li><b>High-Resolution CT Scan:</b> To obtain a detailed view of the lung parenchyma and to better characterize the</li> </ul> |  |



|  |                                                                                                                                                                                                                                                                                                                                                                                                                                                                                                                                                                                                                                                                                                                                                                                                                                                                                                                                                                                                                                                                                                                                                                                                                                                                                                                                                                                                                                                                                                                                                                                                                                                                                                                                                                                                                                                                                                              |                                                                                                                                                                                                                                                                                                                                                                                                                                                                                                                                                                                                                                                                                                                                                                                                                                                                                                                                                                                                                                                                                                                                                                                                                                                                                                                                                                                                                                                                                                                                                                                                                                             |                                                                                                                                                                                                                                                                                                                                                                                                                                                                                                                                                                                                                                                                                                                                                                                                                                                                                                                                                                                                                                                                                                                                                                                                                                                                                                                                                                                                                                                          |                                                                                                                                                                                                                                                                                                                                                                                                                                                                                                                                                                                                                                                                                                                                                                                                                                                                                                                                                                                                                                                                                                                                                                                                                                                                                                                                                                                                                                                                                                                                                                                                                                                                                                                                                                                                                                                                                                                                                                                         |  |
|--|--------------------------------------------------------------------------------------------------------------------------------------------------------------------------------------------------------------------------------------------------------------------------------------------------------------------------------------------------------------------------------------------------------------------------------------------------------------------------------------------------------------------------------------------------------------------------------------------------------------------------------------------------------------------------------------------------------------------------------------------------------------------------------------------------------------------------------------------------------------------------------------------------------------------------------------------------------------------------------------------------------------------------------------------------------------------------------------------------------------------------------------------------------------------------------------------------------------------------------------------------------------------------------------------------------------------------------------------------------------------------------------------------------------------------------------------------------------------------------------------------------------------------------------------------------------------------------------------------------------------------------------------------------------------------------------------------------------------------------------------------------------------------------------------------------------------------------------------------------------------------------------------------------------|---------------------------------------------------------------------------------------------------------------------------------------------------------------------------------------------------------------------------------------------------------------------------------------------------------------------------------------------------------------------------------------------------------------------------------------------------------------------------------------------------------------------------------------------------------------------------------------------------------------------------------------------------------------------------------------------------------------------------------------------------------------------------------------------------------------------------------------------------------------------------------------------------------------------------------------------------------------------------------------------------------------------------------------------------------------------------------------------------------------------------------------------------------------------------------------------------------------------------------------------------------------------------------------------------------------------------------------------------------------------------------------------------------------------------------------------------------------------------------------------------------------------------------------------------------------------------------------------------------------------------------------------|----------------------------------------------------------------------------------------------------------------------------------------------------------------------------------------------------------------------------------------------------------------------------------------------------------------------------------------------------------------------------------------------------------------------------------------------------------------------------------------------------------------------------------------------------------------------------------------------------------------------------------------------------------------------------------------------------------------------------------------------------------------------------------------------------------------------------------------------------------------------------------------------------------------------------------------------------------------------------------------------------------------------------------------------------------------------------------------------------------------------------------------------------------------------------------------------------------------------------------------------------------------------------------------------------------------------------------------------------------------------------------------------------------------------------------------------------------|-----------------------------------------------------------------------------------------------------------------------------------------------------------------------------------------------------------------------------------------------------------------------------------------------------------------------------------------------------------------------------------------------------------------------------------------------------------------------------------------------------------------------------------------------------------------------------------------------------------------------------------------------------------------------------------------------------------------------------------------------------------------------------------------------------------------------------------------------------------------------------------------------------------------------------------------------------------------------------------------------------------------------------------------------------------------------------------------------------------------------------------------------------------------------------------------------------------------------------------------------------------------------------------------------------------------------------------------------------------------------------------------------------------------------------------------------------------------------------------------------------------------------------------------------------------------------------------------------------------------------------------------------------------------------------------------------------------------------------------------------------------------------------------------------------------------------------------------------------------------------------------------------------------------------------------------------------------------------------------------|--|
|  | <p>hepatotoxicity. Also, monitor for potential side effects of corticosteroid therapy.</p> <ul style="list-style-type: none"> <li>- Assess for symptoms of liver dysfunction (e.g., fatigue, jaundice, dark urine, abdominal pain) even if the patient is currently asymptomatic.</li> </ul> <p><b>### If There's No Improvement or Worsening Liver Function:</b></p> <ul style="list-style-type: none"> <li>- <b>Advanced Immunosuppressive Therapy:</b> <ul style="list-style-type: none"> <li>- If there's no improvement with corticosteroids within a week, or if liver enzymes worsen, consider additional immunosuppressive therapy. Mycophenolate mofetil (MMF) or tacrolimus are potential options, often used in consultation with a hepatologist.</li> </ul> </li> <li>- <b>Hepatology Consultation:</b> <ul style="list-style-type: none"> <li>- Involve a hepatologist for further evaluation and management, especially if advanced immunosuppression is being considered or if there's any diagnostic uncertainty.</li> </ul> </li> </ul> <p><b>### Additional Considerations:</b></p> <ul style="list-style-type: none"> <li>- <b>Rule Out Other Causes:</b> <ul style="list-style-type: none"> <li>- While immune-mediated hepatitis is likely given the context, it's important to rule out other potential causes of liver injury, including viral hepatitis, alcohol use, and other drug-induced liver injury.</li> </ul> </li> <li>- <b>Reintroduction of Immunotherapy:</b> <ul style="list-style-type: none"> <li>- Decisions regarding the reintroduction of immunotherapy should be made cautiously once LFTs have normalized and should take into consideration the severity of the hepatitis episode, the availability of alternative treatments, and the patient's overall cancer status. Often, rechallenge with both agents may not be recommended, and</li> </ul> </li> </ul> | <p>due to the potential for hepatotoxicity).</p> <p>4. <b>Re-evaluation:</b></p> <ul style="list-style-type: none"> <li>- Re-evaluate the patient to ensure there are no other contributing factors to the liver injury, including viral hepatitis, other hepatotoxic medications, alcohol use, or biliary obstruction. This may include imaging studies like ultrasound or MRI and possibly a liver biopsy to guide management.</li> </ul> <p>5. <b>Supportive Care:</b></p> <ul style="list-style-type: none"> <li>- Ensure supportive care, including management of symptoms and prevention of complications associated with liver dysfunction and high-dose steroid use.</li> </ul> <p><b>### Monitoring and Further Management:</b></p> <ul style="list-style-type: none"> <li>- <b>Close Monitoring:</b> Regularly monitor LFTs, renal function, and other relevant lab parameters to assess response to treatment and adjust therapy as needed.</li> <li>- <b>Tapering Corticosteroids:</b> Once LFTs begin to improve, gradually taper the corticosteroids to the lowest effective dose to minimize potential side effects, under close supervision.</li> <li>- <b>Long-term Follow-up:</b> After resolution, patients require long-term follow-up given the risk of recurrence and to manage the long-term effects of high-dose steroids and other immunosuppressants.</li> </ul> <p>Managing severe immune-mediated hepatitis in the context of cancer immunotherapy is complex and often requires a multidisciplinary approach, involving oncology, hepatology, and possibly other specialties to ensure comprehensive care.</p> | <p>possible link to the immunotherapy, as irAEs can occur after multiple doses and may not necessarily present immediately after the first dose.</p> <p>Immediate steps should include:</p> <ul style="list-style-type: none"> <li>- <b>Holding Pembrolizumab:</b> The immunotherapy should be temporarily discontinued until a thorough evaluation is conducted and the condition is managed.</li> <li>- <b>Further Evaluation:</b> This should include a high-resolution CT scan of the chest for a better assessment of the lung parenchyma, pulmonary function tests (if the patient's condition allows), and possibly bronchoscopy with bronchoalveolar lavage to exclude infectious causes and further characterize the nature of the pulmonary infiltrates.</li> <li>- <b>Management of Pneumonitis:</b> Depending on the grade of pneumonitis (mild to severe, based on symptoms and imaging), treatment may range from close observation with supportive care for very mild cases to high-dose corticosteroids for more severe presentations.</li> <li>- <b>Consultation with Specialists:</b> Involvement of a pulmonologist and possibly a critical care specialist, especially if there's significant respiratory compromise.</li> </ul> <p>The management of irAEs like pneumonitis requires a careful balance between treating the adverse event and managing the underlying cancer, often necessitating a multidisciplinary approach.</p> | <p>extent and pattern of lung involvement.</p> <ul style="list-style-type: none"> <li>- <b>Infectious Workup:</b> Rule out infectious causes of the symptoms, such as bacterial pneumonia, viral pneumonia (including COVID-19), or opportunistic infections, as these can mimic or coexist with pneumonitis.</li> <li>- <b>Pulmonary Consultation:</b> Involvement of a pulmonologist for expert management and consideration of a bronchoscopy with bronchoalveolar lavage if the diagnosis is uncertain or if there is no improvement with initial treatment.</li> </ul> <p><b>### If No Improvement or Worsening:</b></p> <ul style="list-style-type: none"> <li>- <b>Additional Immunosuppression:</b> If there is no response to corticosteroids within 48-72 hours, or if the patient's condition worsens, consider additional immunosuppressive therapies such as infliximab (a TNF-<math>\alpha</math> inhibitor, contraindicated if there's a suspicion of an infectious etiology) or mycophenolate mofetil.</li> <li>- <b>Hospitalization:</b> Patients with significant respiratory compromise may require hospitalization, potentially in an intensive care unit, for closer monitoring and management.</li> </ul> <p><b>### Long-term Management:</b></p> <ul style="list-style-type: none"> <li>- <b>Gradual Tapering of Corticosteroids:</b> Once the patient shows clinical improvement, gradually taper the corticosteroids over a period of at least 4-6 weeks to prevent recurrence.</li> <li>- <b>Re-assessment for Immunotherapy:</b> The decision to rechallenge with pembrolizumab or to consider alternative cancer treatments should be made carefully, considering the severity of the pneumonitis, the patient's lung function recovery, and the oncological status. In many cases, re-exposure to the same agent that caused severe pneumonitis is avoided.</li> </ul> <p>This situation requires a multidisciplinary approach, involving oncologists,</p> |  |
|--|--------------------------------------------------------------------------------------------------------------------------------------------------------------------------------------------------------------------------------------------------------------------------------------------------------------------------------------------------------------------------------------------------------------------------------------------------------------------------------------------------------------------------------------------------------------------------------------------------------------------------------------------------------------------------------------------------------------------------------------------------------------------------------------------------------------------------------------------------------------------------------------------------------------------------------------------------------------------------------------------------------------------------------------------------------------------------------------------------------------------------------------------------------------------------------------------------------------------------------------------------------------------------------------------------------------------------------------------------------------------------------------------------------------------------------------------------------------------------------------------------------------------------------------------------------------------------------------------------------------------------------------------------------------------------------------------------------------------------------------------------------------------------------------------------------------------------------------------------------------------------------------------------------------|---------------------------------------------------------------------------------------------------------------------------------------------------------------------------------------------------------------------------------------------------------------------------------------------------------------------------------------------------------------------------------------------------------------------------------------------------------------------------------------------------------------------------------------------------------------------------------------------------------------------------------------------------------------------------------------------------------------------------------------------------------------------------------------------------------------------------------------------------------------------------------------------------------------------------------------------------------------------------------------------------------------------------------------------------------------------------------------------------------------------------------------------------------------------------------------------------------------------------------------------------------------------------------------------------------------------------------------------------------------------------------------------------------------------------------------------------------------------------------------------------------------------------------------------------------------------------------------------------------------------------------------------|----------------------------------------------------------------------------------------------------------------------------------------------------------------------------------------------------------------------------------------------------------------------------------------------------------------------------------------------------------------------------------------------------------------------------------------------------------------------------------------------------------------------------------------------------------------------------------------------------------------------------------------------------------------------------------------------------------------------------------------------------------------------------------------------------------------------------------------------------------------------------------------------------------------------------------------------------------------------------------------------------------------------------------------------------------------------------------------------------------------------------------------------------------------------------------------------------------------------------------------------------------------------------------------------------------------------------------------------------------------------------------------------------------------------------------------------------------|-----------------------------------------------------------------------------------------------------------------------------------------------------------------------------------------------------------------------------------------------------------------------------------------------------------------------------------------------------------------------------------------------------------------------------------------------------------------------------------------------------------------------------------------------------------------------------------------------------------------------------------------------------------------------------------------------------------------------------------------------------------------------------------------------------------------------------------------------------------------------------------------------------------------------------------------------------------------------------------------------------------------------------------------------------------------------------------------------------------------------------------------------------------------------------------------------------------------------------------------------------------------------------------------------------------------------------------------------------------------------------------------------------------------------------------------------------------------------------------------------------------------------------------------------------------------------------------------------------------------------------------------------------------------------------------------------------------------------------------------------------------------------------------------------------------------------------------------------------------------------------------------------------------------------------------------------------------------------------------------|--|

|  |                                                                                                                                                                                                                                                                                                              |  |  |                                                                                                                                         |  |
|--|--------------------------------------------------------------------------------------------------------------------------------------------------------------------------------------------------------------------------------------------------------------------------------------------------------------|--|--|-----------------------------------------------------------------------------------------------------------------------------------------|--|
|  | <p>consultation with an oncologist experienced in immunotherapy is advised.</p> <p>The management of immune-related hepatotoxicity requires a careful, stepwise approach and close collaboration with specialists, including oncologists and hepatologists, to ensure the best outcomes for the patient.</p> |  |  | <p>pulmonologists, and potentially critical care specialists, to ensure optimal management of the pneumonitis and underlying NSCLC.</p> |  |
|--|--------------------------------------------------------------------------------------------------------------------------------------------------------------------------------------------------------------------------------------------------------------------------------------------------------------|--|--|-----------------------------------------------------------------------------------------------------------------------------------------|--|

|                           | Dermatitis – practical                                                                                                                                                                                                                                                                                                                                                                                                                                                                                                                                                                                                                                                                                                                                                                                                                                                                                                                                                                                                                                                                                                                                                                                                                                                                                                                                                                                                                                                                                                                                         | Dermatitis – practical                                                                                                                                                                                                                                                                                                                                                                                                                                                                                                                                                                                                                                                                                                                                                                                                                                                                                                                                                                                                                                                                                                                                                                                                                                                                                                                                                                                                                                                                                                                                                                                                                                                                                                                     | Thyroid – practical                                                                                                                                                                                                                                                                                                                                                                                                                                                                                                                                                                                                                                                                                                                                                                                                                                                                                                                                                                                                                                                                                                                                                                                                                                                                                                                                                                                                                                                                                                                                                                                                                                                                                                             | Thyroid - practical                                                                                                                                                                                                                                                                                                                                                                                                                                                                                                                                                                                                                                                                                                                                                                                                                                                                                                                                                                                                                                                                                                                                                                                                                                                                                                                                                                                                                                                                                                                                                                                                                                                                                                                                        |  |
|---------------------------|----------------------------------------------------------------------------------------------------------------------------------------------------------------------------------------------------------------------------------------------------------------------------------------------------------------------------------------------------------------------------------------------------------------------------------------------------------------------------------------------------------------------------------------------------------------------------------------------------------------------------------------------------------------------------------------------------------------------------------------------------------------------------------------------------------------------------------------------------------------------------------------------------------------------------------------------------------------------------------------------------------------------------------------------------------------------------------------------------------------------------------------------------------------------------------------------------------------------------------------------------------------------------------------------------------------------------------------------------------------------------------------------------------------------------------------------------------------------------------------------------------------------------------------------------------------|--------------------------------------------------------------------------------------------------------------------------------------------------------------------------------------------------------------------------------------------------------------------------------------------------------------------------------------------------------------------------------------------------------------------------------------------------------------------------------------------------------------------------------------------------------------------------------------------------------------------------------------------------------------------------------------------------------------------------------------------------------------------------------------------------------------------------------------------------------------------------------------------------------------------------------------------------------------------------------------------------------------------------------------------------------------------------------------------------------------------------------------------------------------------------------------------------------------------------------------------------------------------------------------------------------------------------------------------------------------------------------------------------------------------------------------------------------------------------------------------------------------------------------------------------------------------------------------------------------------------------------------------------------------------------------------------------------------------------------------------|---------------------------------------------------------------------------------------------------------------------------------------------------------------------------------------------------------------------------------------------------------------------------------------------------------------------------------------------------------------------------------------------------------------------------------------------------------------------------------------------------------------------------------------------------------------------------------------------------------------------------------------------------------------------------------------------------------------------------------------------------------------------------------------------------------------------------------------------------------------------------------------------------------------------------------------------------------------------------------------------------------------------------------------------------------------------------------------------------------------------------------------------------------------------------------------------------------------------------------------------------------------------------------------------------------------------------------------------------------------------------------------------------------------------------------------------------------------------------------------------------------------------------------------------------------------------------------------------------------------------------------------------------------------------------------------------------------------------------------|------------------------------------------------------------------------------------------------------------------------------------------------------------------------------------------------------------------------------------------------------------------------------------------------------------------------------------------------------------------------------------------------------------------------------------------------------------------------------------------------------------------------------------------------------------------------------------------------------------------------------------------------------------------------------------------------------------------------------------------------------------------------------------------------------------------------------------------------------------------------------------------------------------------------------------------------------------------------------------------------------------------------------------------------------------------------------------------------------------------------------------------------------------------------------------------------------------------------------------------------------------------------------------------------------------------------------------------------------------------------------------------------------------------------------------------------------------------------------------------------------------------------------------------------------------------------------------------------------------------------------------------------------------------------------------------------------------------------------------------------------------|--|
| Question                  | 82 year old man with metastatic renal cell carcinoma who has received 2 doses of pembrolizumab and axitinib presents with an itchy maculopapular rash on the chest and arms covering approximately 10% of the body surface area. What is the treatment for this rash?                                                                                                                                                                                                                                                                                                                                                                                                                                                                                                                                                                                                                                                                                                                                                                                                                                                                                                                                                                                                                                                                                                                                                                                                                                                                                          | In the patient in the previous scenario, what would be concerning signs that would indicate admission to the hospital or treatment with oral steroids?                                                                                                                                                                                                                                                                                                                                                                                                                                                                                                                                                                                                                                                                                                                                                                                                                                                                                                                                                                                                                                                                                                                                                                                                                                                                                                                                                                                                                                                                                                                                                                                     | 58 year old with stage III melanoma on adjuvant pembrolizumab presents for dose 4 and is feeling well. TSH is elevated to 4.5 (normal 0.35 - 3.6). Free T 4 and T3 are normal. How should the patient be managed?                                                                                                                                                                                                                                                                                                                                                                                                                                                                                                                                                                                                                                                                                                                                                                                                                                                                                                                                                                                                                                                                                                                                                                                                                                                                                                                                                                                                                                                                                                               | The patient in the prior scenario returns for her next infusion 3 weeks later. The TSH is now 22 (normal 0.36 - 3.6) and Free T4 is 0.45 (normal 0.7 - 1.35). The patient has mild fatigue and extremity swelling. How should the patient be managed?                                                                                                                                                                                                                                                                                                                                                                                                                                                                                                                                                                                                                                                                                                                                                                                                                                                                                                                                                                                                                                                                                                                                                                                                                                                                                                                                                                                                                                                                                                      |  |
| Answer Engine 1 (ChatGPT) | <p>An 82-year-old man with metastatic renal cell carcinoma receiving pembrolizumab (an anti-PD-1 therapy) and axitinib (a tyrosine kinase inhibitor) who presents with an itchy maculopapular rash on the chest and arms covering approximately 10% of the body surface area is likely experiencing a cutaneous immune-related adverse event (irAE) from pembrolizumab, a drug-induced rash from axitinib, or a combination of both. Treatment strategies typically focus on managing the symptoms and preventing progression to more severe skin reactions. Given the extent of body surface area involved (10%), this would likely be classified as a Grade 1 or mild skin toxicity according to Common Terminology Criteria for Adverse Events (CTCAE).</p> <p>### Initial Treatment Approach:</p> <ol style="list-style-type: none"> <li><b>Topical Therapies:</b> <ul style="list-style-type: none"> <li>High-potency topical corticosteroids (e.g., clobetasol propionate, betamethasone dipropionate) applied to the rash areas can help reduce inflammation and itching. These are typically used for 2-4 weeks or until the rash improves.</li> <li>Emollients or moisturizers can help soothe the skin and reduce dryness and irritation.</li> </ul> </li> <li><b>Antihistamines:</b> <ul style="list-style-type: none"> <li>Oral antihistamines (e.g., diphenhydramine at night for its sedative effects, or non-sedating options like cetirizine or loratadine during the day) can provide symptomatic relief from itching.</li> </ul> </li> </ol> | <p>For the 82-year-old man with metastatic renal cell carcinoma who has developed an itchy maculopapular rash on the chest and arms covering approximately 10% of the body surface area after receiving pembrolizumab and axitinib, the rash is likely an immune-related adverse event (irAE) from pembrolizumab, a PD-1 inhibitor, possibly exacerbated or influenced by axitinib, a tyrosine kinase inhibitor. Initial management of such mild to moderate dermatologic irAEs typically involves topical therapies and careful monitoring. However, certain signs and symptoms would warrant more aggressive treatment, including oral steroids, or hospital admission:</p> <p>### Signs Warranting Oral Steroids or Hospital Admission:</p> <ol style="list-style-type: none"> <li><b>Increased Extent or Severity of the Rash:</b> <ul style="list-style-type: none"> <li>If the rash spreads to cover more than 30% of the body surface area or shows signs of becoming severe (e.g., severe blistering, extensive skin sloughing resembling severe burns).</li> </ul> </li> <li><b>Signs of Severe Skin Reactions:</b> <ul style="list-style-type: none"> <li>Development of blisters, skin peeling, or ulceration, which may indicate more severe conditions such as Stevens-Johnson syndrome (SJS) or toxic epidermal necrolysis (TEN).</li> </ul> </li> <li><b>Involvement of Mucous Membranes:</b> <ul style="list-style-type: none"> <li>Involvement of the eyes, mouth, or genitals, which may suggest a more serious condition like SJS or erythema multiforme.</li> </ul> </li> <li><b>Systemic Symptoms:</b> <ul style="list-style-type: none"> <li>The presence of fever, chills, or other systemic</li> </ul> </li> </ol> | <p>The presentation of an elevated TSH (4.5, with normal range being 0.35 - 3.6) in a 58-year-old patient with stage III melanoma on adjuvant pembrolizumab, who is otherwise feeling well and has normal free T4 and T3 levels, suggests subclinical hypothyroidism. This condition can occur as an immune-related adverse event (irAE) due to pembrolizumab therapy, which can induce thyroid dysfunction by triggering an immune response against the thyroid gland.</p> <p>### Management Approach:</p> <ol style="list-style-type: none"> <li><b>Close Monitoring:</b> <ul style="list-style-type: none"> <li>Since the patient is asymptomatic and the free T4 and T3 levels are within normal ranges, close monitoring of thyroid function tests (TFTs) is recommended. Repeating the TFTs in 4-6 weeks can help determine if the TSH level is trending upward, stable, or normalizing.</li> </ul> </li> <li><b>Symptom Evaluation:</b> <ul style="list-style-type: none"> <li>Assess for symptoms of hypothyroidism, such as fatigue, weight gain, cold intolerance, constipation, and dry skin, even if the patient currently feels well. The absence of symptoms supports a more conservative approach initially.</li> </ul> </li> <li><b>Consider Levothyroxine for Symptoms or Rising TSH:</b> <ul style="list-style-type: none"> <li>Initiation of levothyroxine therapy may be considered if the patient develops symptoms of hypothyroidism or if there is a significant rise in TSH on subsequent testing (e.g., &gt;10), even in the absence of symptoms. The decision to start treatment should be individualized, taking into account the patient's clinical picture and preferences.</li> </ul> </li> </ol> | <p>The significant elevation in TSH to 22 (with a normal range of 0.36 - 3.6) and a decrease in Free T4 to 0.45 (normal range 0.7 - 1.35), accompanied by mild fatigue and extremity swelling, indicate that the patient has progressed from subclinical hypothyroidism to overt hypothyroidism. This change in thyroid function, particularly in the context of pembrolizumab treatment for stage III melanoma, is consistent with an immune-related adverse event (irAE) affecting the thyroid gland.</p> <p>### Management Approach:</p> <ol style="list-style-type: none"> <li><b>Initiate Levothyroxine:</b> <ul style="list-style-type: none"> <li>Start levothyroxine therapy to treat overt hypothyroidism. The dose of levothyroxine is typically determined based on the patient's weight (approximately 1.6 micrograms per kilogram of body weight per day) but should be individualized based on age, comorbidities, and severity of hypothyroidism.</li> <li>Given the patient's age and clinical presentation, it may be prudent to start at a slightly lower dose and titrate up as needed, especially to avoid potential cardiovascular side effects.</li> </ul> </li> <li><b>Symptom Management:</b> <ul style="list-style-type: none"> <li>Address the patient's symptoms, such as fatigue and extremity swelling, with supportive care while waiting for the levothyroxine to take effect. Improvement in symptoms should be seen as the patient's thyroid function normalizes.</li> </ul> </li> <li><b>Monitor Thyroid Function:</b> <ul style="list-style-type: none"> <li>Recheck thyroid function tests (TFTs) in approximately 4-6 weeks after starting levothyroxine or after any dose adjustment to guide</li> </ul> </li> </ol> |  |

|  |                                                                                                                                                                                                                                                                                                                                                                                                                                                                                                                                                                                                                                                                                                                                                                                                                                                                                                                                                                                                                                                                                                                                                                                                                                                                                                                                                                                                                                                                                                                                                                                                                                                                                                                                                                                                                                                                                                                         |                                                                                                                                                                                                                                                                                                                                                                                                                                                                                                                                                                                                                                                                                                                                                                                                                                                                                                                                                                                                                                                                                                                                                                                                                                                                                                                                                                                                                                                                                                                                                                                                                                                                                                                                                                                                                                                                                                                                                                                                                                                                                                                          |                                                                                                                                                                                                                                                                                                                                                                                                                                                                                                                                                                                                                                                                                                                                                                                                                                                                                                                                                                                                                                                                                                                                                                                                                                                                                                                                                                                                                                                                                                                                                                                                                                                                            |                                                                                                                                                                                                                                                                                                                                                                                                                                                                                                                                                                                                                                                                                                                                                                                                                                                                                                                                                                                                                                                                                                                                                                                                                                                                                                                                                                                                                                                                                                                                                                                                                                                    |  |
|--|-------------------------------------------------------------------------------------------------------------------------------------------------------------------------------------------------------------------------------------------------------------------------------------------------------------------------------------------------------------------------------------------------------------------------------------------------------------------------------------------------------------------------------------------------------------------------------------------------------------------------------------------------------------------------------------------------------------------------------------------------------------------------------------------------------------------------------------------------------------------------------------------------------------------------------------------------------------------------------------------------------------------------------------------------------------------------------------------------------------------------------------------------------------------------------------------------------------------------------------------------------------------------------------------------------------------------------------------------------------------------------------------------------------------------------------------------------------------------------------------------------------------------------------------------------------------------------------------------------------------------------------------------------------------------------------------------------------------------------------------------------------------------------------------------------------------------------------------------------------------------------------------------------------------------|--------------------------------------------------------------------------------------------------------------------------------------------------------------------------------------------------------------------------------------------------------------------------------------------------------------------------------------------------------------------------------------------------------------------------------------------------------------------------------------------------------------------------------------------------------------------------------------------------------------------------------------------------------------------------------------------------------------------------------------------------------------------------------------------------------------------------------------------------------------------------------------------------------------------------------------------------------------------------------------------------------------------------------------------------------------------------------------------------------------------------------------------------------------------------------------------------------------------------------------------------------------------------------------------------------------------------------------------------------------------------------------------------------------------------------------------------------------------------------------------------------------------------------------------------------------------------------------------------------------------------------------------------------------------------------------------------------------------------------------------------------------------------------------------------------------------------------------------------------------------------------------------------------------------------------------------------------------------------------------------------------------------------------------------------------------------------------------------------------------------------|----------------------------------------------------------------------------------------------------------------------------------------------------------------------------------------------------------------------------------------------------------------------------------------------------------------------------------------------------------------------------------------------------------------------------------------------------------------------------------------------------------------------------------------------------------------------------------------------------------------------------------------------------------------------------------------------------------------------------------------------------------------------------------------------------------------------------------------------------------------------------------------------------------------------------------------------------------------------------------------------------------------------------------------------------------------------------------------------------------------------------------------------------------------------------------------------------------------------------------------------------------------------------------------------------------------------------------------------------------------------------------------------------------------------------------------------------------------------------------------------------------------------------------------------------------------------------------------------------------------------------------------------------------------------------|----------------------------------------------------------------------------------------------------------------------------------------------------------------------------------------------------------------------------------------------------------------------------------------------------------------------------------------------------------------------------------------------------------------------------------------------------------------------------------------------------------------------------------------------------------------------------------------------------------------------------------------------------------------------------------------------------------------------------------------------------------------------------------------------------------------------------------------------------------------------------------------------------------------------------------------------------------------------------------------------------------------------------------------------------------------------------------------------------------------------------------------------------------------------------------------------------------------------------------------------------------------------------------------------------------------------------------------------------------------------------------------------------------------------------------------------------------------------------------------------------------------------------------------------------------------------------------------------------------------------------------------------------|--|
|  | <p><b>3. **Skin Care Guidance:**</b></p> <ul style="list-style-type: none"> <li>- Advise gentle skin care practices, such as using mild, fragrance-free soaps and avoiding irritants or harsh scrubbing that can exacerbate the rash.</li> </ul> <p><b>### Monitoring and Adjustments:</b></p> <ul style="list-style-type: none"> <li>- <b>**Close Monitoring:**</b> Regular follow-up to assess the response to treatment and the progression of the rash. If the rash worsens or covers a greater body surface area, treatment needs to be escalated.</li> <li>- <b>**Dose Adjustments for Systemic Therapy:**</b> If the rash becomes more severe (covering &gt;30% of body surface area, Grade 3 or higher), or if it's accompanied by systemic symptoms, consider holding or dose-adjusting pembrolizumab and/or axitinib after assessing the risk-benefit ratio in consultation with the oncology team.</li> <li>- <b>**Systemic Therapies for Severe Cases:**</b> For more severe or refractory cases, systemic treatments such as oral corticosteroids (e.g., prednisone) might be necessary.</li> </ul> <p><b>### Severe Rash Management:</b></p> <ul style="list-style-type: none"> <li>- <b>**Grade 3 or Higher:**</b> For severe (Grade 3) or life-threatening (Grade 4) rashes, systemic corticosteroids (e.g., prednisone 0.5-1 mg/kg/day) may be required, and both pembrolizumab and axitinib may need to be discontinued until the rash resolves to ≤ Grade 1.</li> <li>- <b>**Specialist Consultation:**</b> Consider a dermatology consultation for severe or complex cases, especially if there is concern for other dermatologic conditions or if the diagnosis is uncertain.</li> </ul> <p>The management of skin toxicities in patients on cancer immunotherapy and targeted therapies like axitinib requires a careful and individualized approach, taking into account the severity of the</p> | <p>symptoms could indicate a more serious systemic involvement that requires immediate medical attention.</p> <p><b>5. **Signs of Infection:**</b></p> <ul style="list-style-type: none"> <li>- Evidence of secondary infection within the rash (e.g., pustules, significant warmth, purulent discharge, increasing pain) may necessitate systemic antibiotic therapy.</li> </ul> <p><b>6. **Impact on Daily Activities:**</b></p> <ul style="list-style-type: none"> <li>- If the rash or associated symptoms significantly impair the patient's ability to perform daily activities or result in significant discomfort.</li> </ul> <p><b>7. **Lack of Response to Topical Treatments:**</b></p> <ul style="list-style-type: none"> <li>- If the rash does not improve or worsens despite appropriate topical therapy and careful skin care.</li> </ul> <p><b>### Initial Management Before Escalation:</b></p> <ul style="list-style-type: none"> <li>- For a mild to moderate rash without the concerning features mentioned, management typically includes: <ul style="list-style-type: none"> <li>- Topical corticosteroids to reduce inflammation and itching.</li> <li>- Oral antihistamines to help control pruritus.</li> <li>- Avoidance of irritants and careful skin care to prevent further aggravation of the rash.</li> </ul> </li> </ul> <p>If any of the concerning signs develop, it is crucial to escalate care promptly:</p> <ul style="list-style-type: none"> <li>- <b>**Oral Steroids:**</b> For more severe dermatologic irAEs or those not responding to topical treatments, systemic corticosteroids may be initiated.</li> <li>- <b>**Hospital Admission:**</b> Hospitalization may be necessary for severe cases, especially if there are signs of SJS, TEN, or significant systemic involvement, for multidisciplinary management, including dermatology and possibly critical care.</li> </ul> <p>It's also important to consider the role of axitinib in the rash's development or exacerbation and to evaluate the need for dose adjustments or temporary discontinuation of either</p> | <p><b>4. **Pembrolizumab Continuation:**</b></p> <ul style="list-style-type: none"> <li>- Continue pembrolizumab therapy as planned, unless the patient develops more severe thyroid dysfunction or other irAEs. The development of subclinical hypothyroidism is not typically an indication to discontinue or delay pembrolizumab therapy in the context of melanoma treatment.</li> </ul> <p><b>5. **Endocrinology Consultation:**</b></p> <ul style="list-style-type: none"> <li>- Consider consultation with an endocrinologist if there is any uncertainty about the management, if the TSH levels significantly increase, or if the patient transitions from subclinical to overt hypothyroidism.</li> </ul> <p><b>6. **Patient Education:**</b></p> <ul style="list-style-type: none"> <li>- Educate the patient about the signs and symptoms of hypothyroidism and the importance of reporting new symptoms or changes in their health status.</li> </ul> <p><b>7. **Documentation and Communication:**</b></p> <ul style="list-style-type: none"> <li>- Document the findings and management plan in the patient's medical record and communicate the plan with the patient's primary care provider and other relevant healthcare professionals involved in the patient's care.</li> </ul> <p>Monitoring and management of thyroid function is crucial in patients receiving pembrolizumab due to the risk of irAEs affecting the thyroid gland. A proactive, patient-centered approach ensures timely intervention if the patient's thyroid status worsens, while avoiding unnecessary treatment in those who remain asymptomatic with subclinical changes.</p> | <p>further titration of the levothyroxine dose. The goal is to normalize TSH and Free T4 levels.</p> <p><b>4. **Evaluate Pembrolizumab Therapy:**</b></p> <ul style="list-style-type: none"> <li>- Continue with pembrolizumab treatment, as hypothyroidism can be managed with thyroid hormone replacement without discontinuing the cancer therapy. However, communicate closely with the oncology team regarding the irAE and the management plan.</li> </ul> <p><b>5. **Patient Education:**</b></p> <ul style="list-style-type: none"> <li>- Educate the patient about hypothyroidism, the importance of adhering to levothyroxine therapy, and the need for regular monitoring of thyroid function. Inform the patient about the potential need for lifelong thyroid hormone replacement, given the likelihood that the pembrolizumab-induced hypothyroidism may be permanent.</li> </ul> <p><b>6. **Endocrinology Referral:**</b></p> <ul style="list-style-type: none"> <li>- Consider referral to an endocrinologist for further management and optimization of thyroid hormone replacement therapy, especially if there are challenges in normalizing the thyroid function or if the patient has other endocrine issues or significant comorbidities.</li> </ul> <p>Managing overt hypothyroidism in patients receiving pembrolizumab involves a multidisciplinary approach, ensuring that the patient receives appropriate endocrine care while continuing necessary cancer treatment. Regular monitoring and adjustments to the levothyroxine dose will be essential to maintain euthyroid status and manage symptoms effectively.</p> |  |
|--|-------------------------------------------------------------------------------------------------------------------------------------------------------------------------------------------------------------------------------------------------------------------------------------------------------------------------------------------------------------------------------------------------------------------------------------------------------------------------------------------------------------------------------------------------------------------------------------------------------------------------------------------------------------------------------------------------------------------------------------------------------------------------------------------------------------------------------------------------------------------------------------------------------------------------------------------------------------------------------------------------------------------------------------------------------------------------------------------------------------------------------------------------------------------------------------------------------------------------------------------------------------------------------------------------------------------------------------------------------------------------------------------------------------------------------------------------------------------------------------------------------------------------------------------------------------------------------------------------------------------------------------------------------------------------------------------------------------------------------------------------------------------------------------------------------------------------------------------------------------------------------------------------------------------------|--------------------------------------------------------------------------------------------------------------------------------------------------------------------------------------------------------------------------------------------------------------------------------------------------------------------------------------------------------------------------------------------------------------------------------------------------------------------------------------------------------------------------------------------------------------------------------------------------------------------------------------------------------------------------------------------------------------------------------------------------------------------------------------------------------------------------------------------------------------------------------------------------------------------------------------------------------------------------------------------------------------------------------------------------------------------------------------------------------------------------------------------------------------------------------------------------------------------------------------------------------------------------------------------------------------------------------------------------------------------------------------------------------------------------------------------------------------------------------------------------------------------------------------------------------------------------------------------------------------------------------------------------------------------------------------------------------------------------------------------------------------------------------------------------------------------------------------------------------------------------------------------------------------------------------------------------------------------------------------------------------------------------------------------------------------------------------------------------------------------------|----------------------------------------------------------------------------------------------------------------------------------------------------------------------------------------------------------------------------------------------------------------------------------------------------------------------------------------------------------------------------------------------------------------------------------------------------------------------------------------------------------------------------------------------------------------------------------------------------------------------------------------------------------------------------------------------------------------------------------------------------------------------------------------------------------------------------------------------------------------------------------------------------------------------------------------------------------------------------------------------------------------------------------------------------------------------------------------------------------------------------------------------------------------------------------------------------------------------------------------------------------------------------------------------------------------------------------------------------------------------------------------------------------------------------------------------------------------------------------------------------------------------------------------------------------------------------------------------------------------------------------------------------------------------------|----------------------------------------------------------------------------------------------------------------------------------------------------------------------------------------------------------------------------------------------------------------------------------------------------------------------------------------------------------------------------------------------------------------------------------------------------------------------------------------------------------------------------------------------------------------------------------------------------------------------------------------------------------------------------------------------------------------------------------------------------------------------------------------------------------------------------------------------------------------------------------------------------------------------------------------------------------------------------------------------------------------------------------------------------------------------------------------------------------------------------------------------------------------------------------------------------------------------------------------------------------------------------------------------------------------------------------------------------------------------------------------------------------------------------------------------------------------------------------------------------------------------------------------------------------------------------------------------------------------------------------------------------|--|

|  |                                                                                                |                                                                          |  |  |  |
|--|------------------------------------------------------------------------------------------------|--------------------------------------------------------------------------|--|--|--|
|  | skin reaction, the patient's overall clinical status, and the need for ongoing cancer therapy. | pembrolizumab or axitinib, in consultation with the treating oncologist. |  |  |  |
|--|------------------------------------------------------------------------------------------------|--------------------------------------------------------------------------|--|--|--|

|                           | Pituitary/adrenal – practical                                                                                                                                                                                                                                                                                                                                                                                                                                                                                                                                                                                                                                                                                                                                                                                                                                                                                                                                                                                                                                                                                                                                                                                                                                                                                                                                                                                                                                                                                                                                                                                                                   | Pituitary/adrenal – practical                                                                                                                                                                                                                                                                                                                                                                                                                                                                                                                                                                                                                                                                                                                                                                                                                                                                                                                                                                                                                                                                                                                                                                                                                                                                                                                                                                                                                                                                                                                                                                                                                     | Rheumatologic – practical                                                                                                                                                                                                                                                                                                                                                                                                                                                                                                                                                                                                                                                                                                                                                                                                                                                                                                                                                                                                                                                                                                                                                                                                                                                                                                                                                                                                                                                                                                                                                                                                       | Rheumatologic - practical                                                                                                                                                                                                                                                                                                                                                                                                                                                                                                                                                                                                                                                                                                                                                                                                                                                                                                                                                                                                                                                                                                                                                                                                                                                                                                                                                                                                                                                                                                                                                                         |  |
|---------------------------|-------------------------------------------------------------------------------------------------------------------------------------------------------------------------------------------------------------------------------------------------------------------------------------------------------------------------------------------------------------------------------------------------------------------------------------------------------------------------------------------------------------------------------------------------------------------------------------------------------------------------------------------------------------------------------------------------------------------------------------------------------------------------------------------------------------------------------------------------------------------------------------------------------------------------------------------------------------------------------------------------------------------------------------------------------------------------------------------------------------------------------------------------------------------------------------------------------------------------------------------------------------------------------------------------------------------------------------------------------------------------------------------------------------------------------------------------------------------------------------------------------------------------------------------------------------------------------------------------------------------------------------------------|---------------------------------------------------------------------------------------------------------------------------------------------------------------------------------------------------------------------------------------------------------------------------------------------------------------------------------------------------------------------------------------------------------------------------------------------------------------------------------------------------------------------------------------------------------------------------------------------------------------------------------------------------------------------------------------------------------------------------------------------------------------------------------------------------------------------------------------------------------------------------------------------------------------------------------------------------------------------------------------------------------------------------------------------------------------------------------------------------------------------------------------------------------------------------------------------------------------------------------------------------------------------------------------------------------------------------------------------------------------------------------------------------------------------------------------------------------------------------------------------------------------------------------------------------------------------------------------------------------------------------------------------------|---------------------------------------------------------------------------------------------------------------------------------------------------------------------------------------------------------------------------------------------------------------------------------------------------------------------------------------------------------------------------------------------------------------------------------------------------------------------------------------------------------------------------------------------------------------------------------------------------------------------------------------------------------------------------------------------------------------------------------------------------------------------------------------------------------------------------------------------------------------------------------------------------------------------------------------------------------------------------------------------------------------------------------------------------------------------------------------------------------------------------------------------------------------------------------------------------------------------------------------------------------------------------------------------------------------------------------------------------------------------------------------------------------------------------------------------------------------------------------------------------------------------------------------------------------------------------------------------------------------------------------|---------------------------------------------------------------------------------------------------------------------------------------------------------------------------------------------------------------------------------------------------------------------------------------------------------------------------------------------------------------------------------------------------------------------------------------------------------------------------------------------------------------------------------------------------------------------------------------------------------------------------------------------------------------------------------------------------------------------------------------------------------------------------------------------------------------------------------------------------------------------------------------------------------------------------------------------------------------------------------------------------------------------------------------------------------------------------------------------------------------------------------------------------------------------------------------------------------------------------------------------------------------------------------------------------------------------------------------------------------------------------------------------------------------------------------------------------------------------------------------------------------------------------------------------------------------------------------------------------|--|
| Question                  | 44 year old woman with metastatic melanoma presents with a headache and severe fatigue after her 4th dose of ipilimumab and nivolumab. What diagnostic workup should be done?                                                                                                                                                                                                                                                                                                                                                                                                                                                                                                                                                                                                                                                                                                                                                                                                                                                                                                                                                                                                                                                                                                                                                                                                                                                                                                                                                                                                                                                                   | The patient in the previous scenario has a normal laboratory workup except for a cortisol that is undetectable and a TSH of 0.22 (normal 0.35 - 3.6). Brain MRI shows no metastatic disease but enlargement in the sella turcica. What is the most likely diagnosis and most appropriate treatment?                                                                                                                                                                                                                                                                                                                                                                                                                                                                                                                                                                                                                                                                                                                                                                                                                                                                                                                                                                                                                                                                                                                                                                                                                                                                                                                                               | 74 year old with metastatic NSCLC on pembrolizumab complains of bilateral knee and wrist pain 7 weeks after starting pembrolizumab, worsening over the last few weeks. Laboratory workup including rheumatoid factor and CCP are unremarkable. What is the most likely diagnosis and most appropriate treatment?                                                                                                                                                                                                                                                                                                                                                                                                                                                                                                                                                                                                                                                                                                                                                                                                                                                                                                                                                                                                                                                                                                                                                                                                                                                                                                                | 52 year old on pembrolizumab for adjuvant treatment of resected renal cell carcinoma develops worsening dry mouth for the last few weeks. Lab workup and physical exam is unremarkable, except for dry oral mucous membranes. What is the most likely diagnosis and most appropriate treatment?                                                                                                                                                                                                                                                                                                                                                                                                                                                                                                                                                                                                                                                                                                                                                                                                                                                                                                                                                                                                                                                                                                                                                                                                                                                                                                   |  |
| Answer Engine 1 (ChatGPT) | <p>A 44-year-old woman with metastatic melanoma presenting with a headache and severe fatigue after her fourth dose of combination therapy with ipilimumab and nivolumab requires a thorough diagnostic workup. These symptoms could be indicative of several conditions, including immune-related adverse events (irAEs), which are known to occur with this combination therapy. The workup should aim to identify the cause of these symptoms, considering both neurological and systemic irAEs, as well as other potential etiologies unrelated to the immunotherapy.</p> <p>### Initial Diagnostic Workup:</p> <ol style="list-style-type: none"> <li><b>Comprehensive History and Physical Examination:</b> <ul style="list-style-type: none"> <li>Detailed history focusing on the onset, duration, and characteristics of the headache and fatigue.</li> <li>Assess for associated symptoms such as fever, visual changes, neck stiffness, or any focal neurological deficits.</li> <li>Physical examination should include a thorough neurological exam, assessment for signs of meningismus, and evaluation for lymphadenopathy or other masses.</li> </ul> </li> <li><b>Laboratory Tests:</b> <ul style="list-style-type: none"> <li><b>Complete Blood Count (CBC)</b> with differential to assess for anemia, infection, or hematological abnormalities.</li> <li><b>Comprehensive Metabolic Panel (CMP)</b> to evaluate liver and kidney function, electrolytes, and glucose levels.</li> <li><b>Thyroid Function Tests (TFTs)</b> to rule out thyroid dysfunction, which can be an irAE and cause fatigue.</li> </ul> </li> </ol> | <p>The clinical presentation of a 44-year-old woman with metastatic melanoma, who developed a headache and severe fatigue after her fourth dose of combination therapy with ipilimumab and nivolumab, coupled with an undetectable cortisol level and a slightly low TSH (0.22 with a normal range of 0.35 - 3.6), strongly suggests an immune-related adverse event (irAE) affecting the pituitary gland, known as hypophysitis. The finding of enlargement in the sella turcica on brain MRI supports this diagnosis by indicating inflammation and potential enlargement of the pituitary gland, which is a characteristic radiological finding in hypophysitis.</p> <p>### Most Likely Diagnosis:<br/>- <b>Hypophysitis:</b> This condition is an inflammation of the pituitary gland that can lead to various degrees of pituitary dysfunction. In the context of immune checkpoint inhibitor therapy, particularly with the combination of ipilimumab (a CTLA-4 inhibitor) and nivolumab (a PD-1 inhibitor), hypophysitis is a recognized irAE, though it's more commonly associated with CTLA-4 inhibitors like ipilimumab.</p> <p>### Most Appropriate Treatment:<br/>1. <b>Glucocorticoid Replacement:</b> <ul style="list-style-type: none"> <li>Immediate initiation of glucocorticoid replacement is crucial to manage adrenal insufficiency resulting from pituitary dysfunction. High-dose intravenous glucocorticoids, such as hydrocortisone or methylprednisolone, may be needed initially, especially if the patient is significantly symptomatic.</li> <li>After stabilization, the patient can be switched to</li> </ul> </p> | <p>The 74-year-old patient with metastatic non-small cell lung cancer (NSCLC) on pembrolizumab, who presents with bilateral knee and wrist pain that has worsened over the last few weeks, is likely experiencing an immune-related adverse event (irAE) manifesting as inflammatory arthritis. Pembrolizumab, a PD-1 inhibitor used in the treatment of various cancers, can stimulate the immune system in a way that leads to autoimmunity, causing symptoms similar to rheumatic diseases. The absence of rheumatoid factor and anti-cyclic citrullinated peptide (CCP) antibodies suggests that this is not traditional rheumatoid arthritis but rather an irAE.</p> <p>### Most Likely Diagnosis:<br/>- <b>Immune-Related Arthritis:</b> This condition is characterized by joint pain and inflammation, resembling rheumatoid arthritis or other inflammatory arthritides, but occurring as a side effect of immune checkpoint inhibitors like pembrolizumab.</p> <p>### Most Appropriate Treatment:<br/>1. <b>Symptomatic Management:</b> <ul style="list-style-type: none"> <li>Initial management often includes nonsteroidal anti-inflammatory drugs (NSAIDs) for pain relief and reduction of inflammation. It's important to consider the patient's renal function and gastrointestinal risk before starting NSAIDs.</li> </ul> </p> <p>2. <b>Local Therapies:</b> <ul style="list-style-type: none"> <li>Intra-articular corticosteroid injections may be beneficial for significant joint pain or swelling that does not respond to NSAIDs, especially if only one or a few joints are involved.</li> </ul> </p> | <p>The 52-year-old patient on pembrolizumab for adjuvant treatment of resected renal cell carcinoma, presenting with worsening dry mouth and physical examination findings of dry oral mucous membranes, is likely experiencing xerostomia (dry mouth) as an immune-related adverse event (irAE) associated with pembrolizumab therapy. Pembrolizumab, a PD-1 inhibitor, can cause various irAEs due to its mechanism of action, which involves modulating the immune system and can sometimes lead to autoimmune-like side effects.</p> <p>### Most Likely Diagnosis:<br/>- <b>Immune-Related Xerostomia:</b> This condition is characterized by reduced saliva production, leading to dry mouth, and can occur as an irAE from immunotherapy like pembrolizumab. It's important to note that while xerostomia is less common compared to other irAEs, it can significantly affect the patient's quality of life.</p> <p>### Most Appropriate Treatment:<br/>1. <b>Symptomatic Management:</b> <ul style="list-style-type: none"> <li><b>Saliva Substitutes and Stimulants:</b> Over-the-counter saliva substitutes can provide temporary relief. Saliva stimulants such as sugar-free gum or candies (preferably with xylitol) can also be helpful in increasing saliva production if the patient has some residual salivary gland function.</li> <li><b>Good Oral Hygiene:</b> Emphasize the importance of good oral hygiene practices, including regular tooth brushing with fluoride toothpaste and flossing, to prevent dental complications that can arise from dry mouth.</li> </ul> </p> |  |

|                                                                                                                                                                                                                                                                                                                                                                                                                                                                                                                                                                                                                                                                                                                                                                                                                                                                                                                                                                                                                                                                                                                                                                                                                                                                                                                                                                                                                                                                                                                                                                                                                                                                                                                                                                                                                                                                                                                                                                                                     |                                                                                                                                                                                                                                                                                                                                                                                                                                                                                                                                                                                                                                                                                                                                                                                                                                                                                                                                                                                                                                                                                                                                                                                                                                                                                                                                                                                                                                                                                                                                                                                                                                                                                                                                                                                                                                                                                                   |                                                                                                                                                                                                                                                                                                                                                                                                                                                                                                                                                                                                                                                                                                                                                                                                                                                                                                                                                                                                                                                                                                                                                                                                                                                                                                                                                                                                                                                                                                                                                                                                                                                                                                                                                                                                                                                                                                                         |                                                                                                                                                                                                                                                                                                                                                                                                                                                                                                                                                                                                                                                                                                                                                                                                                                                                                                                                                                                                                                                                                                                                                                                                                                                                                                                                                                                                                                                                                                                                                                                                                                                                                                                                                                                                                                                                                        |  |
|-----------------------------------------------------------------------------------------------------------------------------------------------------------------------------------------------------------------------------------------------------------------------------------------------------------------------------------------------------------------------------------------------------------------------------------------------------------------------------------------------------------------------------------------------------------------------------------------------------------------------------------------------------------------------------------------------------------------------------------------------------------------------------------------------------------------------------------------------------------------------------------------------------------------------------------------------------------------------------------------------------------------------------------------------------------------------------------------------------------------------------------------------------------------------------------------------------------------------------------------------------------------------------------------------------------------------------------------------------------------------------------------------------------------------------------------------------------------------------------------------------------------------------------------------------------------------------------------------------------------------------------------------------------------------------------------------------------------------------------------------------------------------------------------------------------------------------------------------------------------------------------------------------------------------------------------------------------------------------------------------------|---------------------------------------------------------------------------------------------------------------------------------------------------------------------------------------------------------------------------------------------------------------------------------------------------------------------------------------------------------------------------------------------------------------------------------------------------------------------------------------------------------------------------------------------------------------------------------------------------------------------------------------------------------------------------------------------------------------------------------------------------------------------------------------------------------------------------------------------------------------------------------------------------------------------------------------------------------------------------------------------------------------------------------------------------------------------------------------------------------------------------------------------------------------------------------------------------------------------------------------------------------------------------------------------------------------------------------------------------------------------------------------------------------------------------------------------------------------------------------------------------------------------------------------------------------------------------------------------------------------------------------------------------------------------------------------------------------------------------------------------------------------------------------------------------------------------------------------------------------------------------------------------------|-------------------------------------------------------------------------------------------------------------------------------------------------------------------------------------------------------------------------------------------------------------------------------------------------------------------------------------------------------------------------------------------------------------------------------------------------------------------------------------------------------------------------------------------------------------------------------------------------------------------------------------------------------------------------------------------------------------------------------------------------------------------------------------------------------------------------------------------------------------------------------------------------------------------------------------------------------------------------------------------------------------------------------------------------------------------------------------------------------------------------------------------------------------------------------------------------------------------------------------------------------------------------------------------------------------------------------------------------------------------------------------------------------------------------------------------------------------------------------------------------------------------------------------------------------------------------------------------------------------------------------------------------------------------------------------------------------------------------------------------------------------------------------------------------------------------------------------------------------------------------------------------------------------------------|----------------------------------------------------------------------------------------------------------------------------------------------------------------------------------------------------------------------------------------------------------------------------------------------------------------------------------------------------------------------------------------------------------------------------------------------------------------------------------------------------------------------------------------------------------------------------------------------------------------------------------------------------------------------------------------------------------------------------------------------------------------------------------------------------------------------------------------------------------------------------------------------------------------------------------------------------------------------------------------------------------------------------------------------------------------------------------------------------------------------------------------------------------------------------------------------------------------------------------------------------------------------------------------------------------------------------------------------------------------------------------------------------------------------------------------------------------------------------------------------------------------------------------------------------------------------------------------------------------------------------------------------------------------------------------------------------------------------------------------------------------------------------------------------------------------------------------------------------------------------------------------|--|
| <p>- **Adrenal Function Tests**<sup>**</sup>, including cortisol levels, as adrenal insufficiency is a potential irAE that can present with fatigue and headache.</p> <p>- **Inflammatory Markers**<sup>**</sup>, such as ESR (erythrocyte sedimentation rate) and CRP (C-reactive protein), which might be elevated in systemic inflammatory processes.</p> <p>3. <b>**Neuroimaging:**</b><sup>**</sup></p> <p>- <b>**MRI of the Brain**</b><sup>**</sup> with and without contrast to assess for any intracranial abnormalities, including metastases, bleeding, or signs of immune-related encephalitis or other central nervous system (CNS) irAEs.</p> <p>4. <b>**Lumbar Puncture:**</b><sup>**</sup></p> <p>- If there is a clinical suspicion of meningitis or encephalitis, particularly if the MRI shows any concerning findings, to analyze cerebrospinal fluid (CSF) for cell count, protein, glucose, and possible infectious agents.</p> <p>5. <b>**Infection Workup:**</b><sup>**</sup></p> <p>- Consider testing for infections that could present with headache and fatigue, including HIV, syphilis, and viral hepatitis, based on risk factors and clinical judgment.</p> <p>6. <b>**Cardiac Evaluation:**</b><sup>**</sup></p> <p>- If there's any clinical indication or history suggesting a cardiac cause of fatigue, consider an ECG and possibly an echocardiogram to evaluate cardiac function, especially since irAEs can affect any organ system.</p> <p>### Further Considerations:</p> <p>- <b>**Immune-Related Hypophysitis:**</b><sup>**</sup> Given the combination of ipilimumab and nivolumab, there's a risk of hypophysitis, an inflammation of the pituitary gland, which can present with headache and fatigue due to hormonal deficiencies. Checking pituitary hormone levels (ACTH, TSH, LH, FSH, GH, prolactin) and considering an MRI of the pituitary gland can be valuable.</p> <p>- <b>**Monitor and Manage Symptoms:**</b><sup>**</sup> While the</p> | <p>oral glucocorticoids, and the dose can be adjusted based on clinical response and cortisol levels.</p> <p>2. <b>**Electrolyte and Fluid Management:**</b><sup>**</sup></p> <p>- Monitor and manage electrolyte imbalances and ensure adequate hydration, which can be affected by adrenal insufficiency.</p> <p>3. <b>**Thyroid Hormone Replacement:**</b><sup>**</sup></p> <p>- Although the TSH is slightly low, free T4 levels and clinical assessment of thyroid function are necessary to determine if thyroid hormone replacement is needed. If central hypothyroidism is diagnosed (which might be the case given the pituitary involvement), levothyroxine therapy should be initiated.</p> <p>4. <b>**Assessment of Other Pituitary Hormones:**</b><sup>**</sup></p> <p>- Evaluate other anterior pituitary hormones, including LH, FSH, growth hormone, and prolactin, to assess the extent of pituitary dysfunction and address any other deficiencies.</p> <p>5. <b>**Consultation with Endocrinology:**</b><sup>**</sup></p> <p>- Involve an endocrinologist for expert management of hypophysitis and endocrine dysfunctions, including long-term hormone replacement therapy and monitoring.</p> <p>6. <b>**Management of Immune Checkpoint Inhibitors:**</b><sup>**</sup></p> <p>- Hold ipilimumab and nivolumab therapy and consult with the oncology team regarding the risks and benefits of continuing treatment, given the development of hypophysitis. The decision to resume therapy will depend on the severity of the irAE, the patient's cancer status, and available treatment alternatives.</p> <p>7. <b>**Patient Education:**</b><sup>**</sup></p> <p>- Educate the patient on the importance of adherence to hormone replacement therapy, recognition of symptoms of adrenal insufficiency (e.g., fatigue, nausea, dizziness), and the need for stress-dose</p> | <p>3. <b>**Systemic Corticosteroids:**</b><sup>**</sup></p> <p>- If the arthritis is polyarticular or NSAIDs are ineffective or contraindicated, low-dose oral corticosteroids (e.g., prednisone) may be used to control symptoms. The goal is to use the lowest effective dose to minimize potential side effects, particularly in the elderly.</p> <p>4. <b>**Disease-Modifying Antirheumatic Drugs (DMARDs):**</b><sup>**</sup></p> <p>- For patients with persistent or severe symptoms not controlled by the above measures, consideration may be given to disease-modifying antirheumatic drugs (DMARDs), such as methotrexate or hydroxychloroquine, in consultation with a rheumatologist.</p> <p>5. <b>**Hold or Discontinue Pembrolizumab:**</b><sup>**</sup></p> <p>- Depending on the severity of the arthritis and the response to treatment, it may be necessary to hold pembrolizumab temporarily or discontinue it, in discussion with the oncology team.</p> <p>6. <b>**Rheumatology Consultation:**</b><sup>**</sup></p> <p>- A referral to a rheumatologist is advisable for further evaluation, management, and long-term monitoring, particularly if DMARDs are being considered or if the diagnosis is uncertain.</p> <p>7. <b>**Physical Therapy:**</b><sup>**</sup></p> <p>- Physical therapy can be helpful in maintaining joint function, reducing pain, and improving the quality of life.</p> <p>8. <b>**Patient Education:**</b><sup>**</sup></p> <p>- Educate the patient about the importance of reporting new or worsening symptoms, adhering to the prescribed treatment plan, and the potential need for adjustments in cancer therapy.</p> <p>The management of irAEs such as immune-related arthritis requires a multidisciplinary approach, involving oncologists, rheumatologists, and possibly other specialists to ensure comprehensive care that addresses both the cancer</p> | <p>- <b>**Hydration:**</b><sup>**</sup> Encourage the patient to stay well-hydrated by sipping water throughout the day, which can help alleviate dry mouth symptoms.</p> <p>2. <b>**Review Medications:**</b><sup>**</sup></p> <p>- <b>**Review Other Medications:**</b><sup>**</sup> Evaluate other medications the patient may be taking that could contribute to dry mouth, and consider alternatives if possible.</p> <p>3. <b>**Pilocarpine:**</b><sup>**</sup></p> <p>- For more severe cases, consider prescribing pilocarpine, a cholinergic agonist that can stimulate saliva production. The use of pilocarpine should be discussed with the patient, considering potential side effects like sweating, increased urination, and flushing.</p> <p>4. <b>**Management of Underlying Condition:**</b><sup>**</sup></p> <p>- While the primary treatment is symptomatic, it's crucial to monitor for other potential irAEs, given the context of pembrolizumab therapy. Regular follow-up and comprehensive evaluation for new or worsening symptoms are important.</p> <p>5. <b>**Specialist Referral:**</b><sup>**</sup></p> <p>- Consider referral to a dentist or oral medicine specialist for further evaluation and management, particularly if there are concerns about oral health complications or if standard measures are ineffective.</p> <p>6. <b>**Patient Education:**</b><sup>**</sup></p> <p>- Educate the patient about the importance of maintaining oral hydration, avoiding mouthwashes with alcohol (which can be drying), and the need for regular dental check-ups to prevent complications from dry mouth.</p> <p>The management of immune-related xerostomia involves a multidisciplinary approach, focusing on symptom relief, maintaining oral health, and regular monitoring for other potential irAEs associated with pembrolizumab therapy.</p> |  |
|-----------------------------------------------------------------------------------------------------------------------------------------------------------------------------------------------------------------------------------------------------------------------------------------------------------------------------------------------------------------------------------------------------------------------------------------------------------------------------------------------------------------------------------------------------------------------------------------------------------------------------------------------------------------------------------------------------------------------------------------------------------------------------------------------------------------------------------------------------------------------------------------------------------------------------------------------------------------------------------------------------------------------------------------------------------------------------------------------------------------------------------------------------------------------------------------------------------------------------------------------------------------------------------------------------------------------------------------------------------------------------------------------------------------------------------------------------------------------------------------------------------------------------------------------------------------------------------------------------------------------------------------------------------------------------------------------------------------------------------------------------------------------------------------------------------------------------------------------------------------------------------------------------------------------------------------------------------------------------------------------------|---------------------------------------------------------------------------------------------------------------------------------------------------------------------------------------------------------------------------------------------------------------------------------------------------------------------------------------------------------------------------------------------------------------------------------------------------------------------------------------------------------------------------------------------------------------------------------------------------------------------------------------------------------------------------------------------------------------------------------------------------------------------------------------------------------------------------------------------------------------------------------------------------------------------------------------------------------------------------------------------------------------------------------------------------------------------------------------------------------------------------------------------------------------------------------------------------------------------------------------------------------------------------------------------------------------------------------------------------------------------------------------------------------------------------------------------------------------------------------------------------------------------------------------------------------------------------------------------------------------------------------------------------------------------------------------------------------------------------------------------------------------------------------------------------------------------------------------------------------------------------------------------------|-------------------------------------------------------------------------------------------------------------------------------------------------------------------------------------------------------------------------------------------------------------------------------------------------------------------------------------------------------------------------------------------------------------------------------------------------------------------------------------------------------------------------------------------------------------------------------------------------------------------------------------------------------------------------------------------------------------------------------------------------------------------------------------------------------------------------------------------------------------------------------------------------------------------------------------------------------------------------------------------------------------------------------------------------------------------------------------------------------------------------------------------------------------------------------------------------------------------------------------------------------------------------------------------------------------------------------------------------------------------------------------------------------------------------------------------------------------------------------------------------------------------------------------------------------------------------------------------------------------------------------------------------------------------------------------------------------------------------------------------------------------------------------------------------------------------------------------------------------------------------------------------------------------------------|----------------------------------------------------------------------------------------------------------------------------------------------------------------------------------------------------------------------------------------------------------------------------------------------------------------------------------------------------------------------------------------------------------------------------------------------------------------------------------------------------------------------------------------------------------------------------------------------------------------------------------------------------------------------------------------------------------------------------------------------------------------------------------------------------------------------------------------------------------------------------------------------------------------------------------------------------------------------------------------------------------------------------------------------------------------------------------------------------------------------------------------------------------------------------------------------------------------------------------------------------------------------------------------------------------------------------------------------------------------------------------------------------------------------------------------------------------------------------------------------------------------------------------------------------------------------------------------------------------------------------------------------------------------------------------------------------------------------------------------------------------------------------------------------------------------------------------------------------------------------------------------|--|

|  |                                                                                                                                                                                                                                                                                                                                                                                                                                                                                              |                                                                                                                                                                                                                                                                                                                                                                         |                                                           |  |  |
|--|----------------------------------------------------------------------------------------------------------------------------------------------------------------------------------------------------------------------------------------------------------------------------------------------------------------------------------------------------------------------------------------------------------------------------------------------------------------------------------------------|-------------------------------------------------------------------------------------------------------------------------------------------------------------------------------------------------------------------------------------------------------------------------------------------------------------------------------------------------------------------------|-----------------------------------------------------------|--|--|
|  | <p>diagnostic workup is ongoing, symptomatic management of the headache and fatigue should be provided, with careful consideration of the potential need to hold or discontinue the immunotherapy, depending on the findings.</p> <p>Given the complexity of potential causes in this scenario, a multidisciplinary approach involving oncology, neurology, endocrinology, and possibly infectious disease specialists is recommended to ensure comprehensive evaluation and management.</p> | <p>steroids during periods of illness or surgery.</p> <p>The management of hypophysitis requires a comprehensive approach to address the acute symptoms, initiate appropriate hormone replacement therapies, and consider the long-term implications of pituitary dysfunction, all while carefully weighing the benefits and risks of ongoing cancer immunotherapy.</p> | <p>and the immune-mediated side effects of treatment.</p> |  |  |
|--|----------------------------------------------------------------------------------------------------------------------------------------------------------------------------------------------------------------------------------------------------------------------------------------------------------------------------------------------------------------------------------------------------------------------------------------------------------------------------------------------|-------------------------------------------------------------------------------------------------------------------------------------------------------------------------------------------------------------------------------------------------------------------------------------------------------------------------------------------------------------------------|-----------------------------------------------------------|--|--|



|                           | Neuromuscular – practical                                                                                                                                                                                                                                                                                                                                                                                                                                                                                                                                                                                                                                                                                                                                                                                                                                                                                                                                                                                                                                                                                                                                               | Neuromuscular – practical                                                                                                                                                                                                                                                                                                                                                                                                                                                                                                                                                                                                                                                                                                                                                                                                                                                                                                                                                                                                                                                                                                                                                                                                                                                                                                               | Cardiac – practical                                                                                                                                                                                                                                                                                                                                                                                                                                                                                                                                                                                                                                                                                                                                                                                                                                                                                                                                                                                                                                                                                                                                                                                                                                                                                                                           | Cardiac – practical                                                                                                                                                                                                                                                                                                                                                                                                                                                                                                                                                                                                                                                                                                                                                                                                                                                                                                                                                                                                                                                                                                                                                                                                                                                                                                                                  |  |
|---------------------------|-------------------------------------------------------------------------------------------------------------------------------------------------------------------------------------------------------------------------------------------------------------------------------------------------------------------------------------------------------------------------------------------------------------------------------------------------------------------------------------------------------------------------------------------------------------------------------------------------------------------------------------------------------------------------------------------------------------------------------------------------------------------------------------------------------------------------------------------------------------------------------------------------------------------------------------------------------------------------------------------------------------------------------------------------------------------------------------------------------------------------------------------------------------------------|-----------------------------------------------------------------------------------------------------------------------------------------------------------------------------------------------------------------------------------------------------------------------------------------------------------------------------------------------------------------------------------------------------------------------------------------------------------------------------------------------------------------------------------------------------------------------------------------------------------------------------------------------------------------------------------------------------------------------------------------------------------------------------------------------------------------------------------------------------------------------------------------------------------------------------------------------------------------------------------------------------------------------------------------------------------------------------------------------------------------------------------------------------------------------------------------------------------------------------------------------------------------------------------------------------------------------------------------|-----------------------------------------------------------------------------------------------------------------------------------------------------------------------------------------------------------------------------------------------------------------------------------------------------------------------------------------------------------------------------------------------------------------------------------------------------------------------------------------------------------------------------------------------------------------------------------------------------------------------------------------------------------------------------------------------------------------------------------------------------------------------------------------------------------------------------------------------------------------------------------------------------------------------------------------------------------------------------------------------------------------------------------------------------------------------------------------------------------------------------------------------------------------------------------------------------------------------------------------------------------------------------------------------------------------------------------------------|------------------------------------------------------------------------------------------------------------------------------------------------------------------------------------------------------------------------------------------------------------------------------------------------------------------------------------------------------------------------------------------------------------------------------------------------------------------------------------------------------------------------------------------------------------------------------------------------------------------------------------------------------------------------------------------------------------------------------------------------------------------------------------------------------------------------------------------------------------------------------------------------------------------------------------------------------------------------------------------------------------------------------------------------------------------------------------------------------------------------------------------------------------------------------------------------------------------------------------------------------------------------------------------------------------------------------------------------------|--|
| Question                  | 53 year old with metastatic NSCLC on pembrolizumab develops headaches and mild confusion after 3 doses of treatment. Laboratory workup is unremarkable other than white blood cell count of 14 (normal 3.5 - 10.5), but lumbar puncture shows elevated protein, normal glucose, and 73 nucleated cells (82% lymphocytes, 8% monocytes, 10% neutrophils). He has a maximum temperature of 100.2, vital signs are stable otherwise. What is the most likely diagnosis and most appropriate treatment?                                                                                                                                                                                                                                                                                                                                                                                                                                                                                                                                                                                                                                                                     | 49 year old with metastatic melanoma on ipilimumab and nivolumab develops weakness in the legs and arms 16 days after his first treatment. What diagnostic tests and differential diagnoses should I consider?                                                                                                                                                                                                                                                                                                                                                                                                                                                                                                                                                                                                                                                                                                                                                                                                                                                                                                                                                                                                                                                                                                                          | 52 year old with metastatic MSI-high colorectal cancer on ipilimumab and nivolumab presents for her second infusion complaining of fluttering in the chest and chest pain. Her troponin level is elevated at 1.5 (normal <0.1). What other tests should I order?                                                                                                                                                                                                                                                                                                                                                                                                                                                                                                                                                                                                                                                                                                                                                                                                                                                                                                                                                                                                                                                                              | The patient in the previous scenario is found to have 2nd degree heart block on EKG, normal echocardiogram, and elevated CK to 1575 (normal 30-220). What is the most likely diagnosis and most appropriate treatment?                                                                                                                                                                                                                                                                                                                                                                                                                                                                                                                                                                                                                                                                                                                                                                                                                                                                                                                                                                                                                                                                                                                               |  |
| Answer Engine 1 (ChatGPT) | <p>The presentation of headaches, mild confusion, elevated white blood cell count, and lumbar puncture findings showing elevated protein, normal glucose, and lymphocytic pleocytosis in a 53-year-old patient with metastatic non-small cell lung cancer (NSCLC) on pembrolizumab after 3 doses suggests an immune-related adverse event (irAE), specifically <b>**immune-mediated encephalitis**</b>. Pembrolizumab, a PD-1 inhibitor, can cause various irAEs due to its immunomodulatory effects, including neurologic irAEs such as encephalitis, which, although rare, can be serious and require prompt recognition and management.</p> <p><b>### Most Likely Diagnosis:</b><br/>- <b>**Immune-mediated Encephalitis:**</b> The clinical and CSF findings are suggestive of encephalitis, and in the context of recent pembrolizumab treatment, immune-mediated etiology is highly probable.</p> <p><b>### Most Appropriate Treatment:</b></p> <ol style="list-style-type: none"> <li><b>**Hold Pembrolizumab:**</b><br/>- Discontinue pembrolizumab immediately to prevent further immune activation.</li> <li><b>**High-dose Corticosteroids:**</b></li> </ol> | <p>The development of limb weakness in a 49-year-old patient with metastatic melanoma after starting combination therapy with ipilimumab and nivolumab raises concerns for several potential causes, including immune-related adverse events (irAEs) associated with immunotherapy. Here's how you can approach the situation:</p> <p><b>### Diagnostic Tests:</b></p> <ol style="list-style-type: none"> <li><b>**Neurological Examination:**</b><br/>- A detailed neurological examination to assess the pattern of weakness, reflexes, sensory function, and coordination.</li> <li><b>**Blood Tests:**</b><br/>- Complete blood count (CBC), comprehensive metabolic panel (CMP), including electrolytes to rule out metabolic causes; creatine kinase (CK) to evaluate for myositis; thyroid function tests given the potential for irAEs affecting the thyroid; and possibly specific autoantibodies if an autoimmune etiology is suspected.</li> <li><b>**Cerebrospinal Fluid (CSF) Analysis:**</b><br/>- Lumbar puncture to analyze CSF for cell count, protein, glucose, and possible oligoclonal bands, which can help in identifying infectious or inflammatory processes.</li> <li><b>**Magnetic Resonance Imaging (MRI):**</b><br/>- MRI of the brain and spinal cord with and without contrast to look for any</li> </ol> | <p>A 52-year-old patient with metastatic MSI-high colorectal cancer on combination therapy with ipilimumab and nivolumab, presenting with symptoms of fluttering in the chest, chest pain, and an elevated troponin level, raises concern for potential cardiac involvement, including an immune-related adverse event (irAE) such as myocarditis, which is a rare but serious complication of immune checkpoint inhibitor therapy. Immediate and comprehensive evaluation is crucial to assess the extent of cardiac involvement and to rule out other potential causes.</p> <p><b>### Additional Tests to Order:</b></p> <ol style="list-style-type: none"> <li><b>**Electrocardiogram (ECG):**</b><br/>- To assess for arrhythmias, ischemic changes, or other electrical abnormalities that might explain the symptoms and elevated troponin.</li> <li><b>**Echocardiogram:**</b><br/>- To evaluate cardiac structure and function, including ejection fraction, wall motion abnormalities, and any signs of pericardial effusion, which can be associated with myocarditis or other cardiac irAEs.</li> <li><b>**High-sensitivity C-reactive protein (hs-CRP) and Erythrocyte Sedimentation Rate (ESR):**</b><br/>- To assess for systemic inflammation, which can be elevated in the setting of myocarditis and other irAEs.</li> </ol> | <p>The findings in the 52-year-old patient with metastatic MSI-high colorectal cancer on ipilimumab and nivolumab, including symptoms of fluttering in the chest and chest pain, elevated troponin level, 2nd degree heart block on EKG, normal echocardiogram, and significantly elevated creatine kinase (CK), are highly suggestive of an immune-related myocarditis, which is a known but rare and potentially life-threatening adverse effect of immune checkpoint inhibitors (ICIs).</p> <p><b>### Most Likely Diagnosis:</b><br/>- <b>**Immune-Related Myocarditis:**</b> The combination of clinical symptoms, elevated cardiac biomarkers, and EKG changes in the context of recent ICI therapy points toward myocarditis. The normal echocardiogram does not rule out myocarditis, as structural changes might not be evident, especially in the early stages of the disease.</p> <p><b>### Most Appropriate Treatment:</b></p> <ol style="list-style-type: none"> <li><b>**Immediate Management:**</b><br/>- Hospitalization for close monitoring in a setting where cardiac monitoring and immediate intervention are available, preferably in a cardiac care unit.</li> <li><b>**Hold Ipilimumab and Nivolumab:**</b><br/>- Discontinue the immune checkpoint inhibitors immediately to halt further immune-mediated damage.</li> </ol> |  |

|                                                                                                                                                                                                                                                                                                                                                                                                                                                                                                                                                                                                                                                                                                                                                                                                                                                                                                                                                                                                                                                                                                                                                                                                                                                                                                                                                                                                                                                                                                                                                                                                                                                                                                                                                                 |                                                                                                                                                                                                                                                                                                                                                                                                                                                                                                                                                                                                                                                                                                                                                                                                                                                                                                                                                                                                                                                                                                                                                                                                                                                                                                                                                                                                                                                                                                                                                                                                                                                                                                                                                                                      |                                                                                                                                                                                                                                                                                                                                                                                                                                                                                                                                                                                                                                                                                                                                                                                                                                                                                                                                                                                                                                                                                                                                                                                                                                                                                                                                                                                                                                                                                                                                                                                                                                                                                                                                                                                                                                                                                     |                                                                                                                                                                                                                                                                                                                                                                                                                                                                                                                                                                                                                                                                                                                                                                                                                                                                                                                                                                                                                                                                                                                                                                                                                                                                                                                                                                                                                                                                                                                                                                                                                                                                                                                                                                                                                                                         |  |  |
|-----------------------------------------------------------------------------------------------------------------------------------------------------------------------------------------------------------------------------------------------------------------------------------------------------------------------------------------------------------------------------------------------------------------------------------------------------------------------------------------------------------------------------------------------------------------------------------------------------------------------------------------------------------------------------------------------------------------------------------------------------------------------------------------------------------------------------------------------------------------------------------------------------------------------------------------------------------------------------------------------------------------------------------------------------------------------------------------------------------------------------------------------------------------------------------------------------------------------------------------------------------------------------------------------------------------------------------------------------------------------------------------------------------------------------------------------------------------------------------------------------------------------------------------------------------------------------------------------------------------------------------------------------------------------------------------------------------------------------------------------------------------|--------------------------------------------------------------------------------------------------------------------------------------------------------------------------------------------------------------------------------------------------------------------------------------------------------------------------------------------------------------------------------------------------------------------------------------------------------------------------------------------------------------------------------------------------------------------------------------------------------------------------------------------------------------------------------------------------------------------------------------------------------------------------------------------------------------------------------------------------------------------------------------------------------------------------------------------------------------------------------------------------------------------------------------------------------------------------------------------------------------------------------------------------------------------------------------------------------------------------------------------------------------------------------------------------------------------------------------------------------------------------------------------------------------------------------------------------------------------------------------------------------------------------------------------------------------------------------------------------------------------------------------------------------------------------------------------------------------------------------------------------------------------------------------|-------------------------------------------------------------------------------------------------------------------------------------------------------------------------------------------------------------------------------------------------------------------------------------------------------------------------------------------------------------------------------------------------------------------------------------------------------------------------------------------------------------------------------------------------------------------------------------------------------------------------------------------------------------------------------------------------------------------------------------------------------------------------------------------------------------------------------------------------------------------------------------------------------------------------------------------------------------------------------------------------------------------------------------------------------------------------------------------------------------------------------------------------------------------------------------------------------------------------------------------------------------------------------------------------------------------------------------------------------------------------------------------------------------------------------------------------------------------------------------------------------------------------------------------------------------------------------------------------------------------------------------------------------------------------------------------------------------------------------------------------------------------------------------------------------------------------------------------------------------------------------------|---------------------------------------------------------------------------------------------------------------------------------------------------------------------------------------------------------------------------------------------------------------------------------------------------------------------------------------------------------------------------------------------------------------------------------------------------------------------------------------------------------------------------------------------------------------------------------------------------------------------------------------------------------------------------------------------------------------------------------------------------------------------------------------------------------------------------------------------------------------------------------------------------------------------------------------------------------------------------------------------------------------------------------------------------------------------------------------------------------------------------------------------------------------------------------------------------------------------------------------------------------------------------------------------------------------------------------------------------------------------------------------------------------------------------------------------------------------------------------------------------------------------------------------------------------------------------------------------------------------------------------------------------------------------------------------------------------------------------------------------------------------------------------------------------------------------------------------------------------|--|--|
| <p>- Initiate high-dose intravenous corticosteroids (e.g., methylprednisolone) to reduce inflammation in the central nervous system (CNS). This is the first-line treatment for moderate to severe neurologic irAEs.</p> <p>3. <b>**Supportive Care:**</b><br/>- Provide supportive care, including management of fever, hydration, and ensuring patient safety, particularly if there is confusion or altered mental status.</p> <p>4. <b>**Neurology Consultation:**</b><br/>- Consult neurology for comprehensive evaluation and management, including considerations for additional diagnostic testing to rule out other causes of encephalitis (infectious, paraneoplastic, etc.) and for continuous monitoring of neurological status.</p> <p>5. <b>**Infectious Disease Evaluation:**</b><br/>- Consider a consultation with infectious diseases to evaluate and exclude infectious causes of encephalitis, even though the clinical and CSF profile may favor an immune-mediated process. This might include additional testing for viruses like HSV, HIV, and others, depending on the clinical context and exposure history.</p> <p>6. <b>**Additional Immunosuppression:**</b><br/>- If there is no improvement with corticosteroids or if the patient's condition worsens, consider additional immunosuppressive therapies such as IVIG (intravenous immunoglobulin) or plasmapheresis. The choice of second-line therapy should be made in consultation with neurology and based on the patient's clinical status.</p> <p>7. <b>**Close Monitoring:**</b><br/>- Monitor the patient closely in a setting where appropriate neurological and medical support can be provided, potentially in an intensive care unit if there are concerns about</p> | <p>central nervous system (CNS) lesions, signs of myelitis, or other pathologies.</p> <p>5. <b>**Nerve Conduction Studies and Electromyography (EMG):**</b><br/>- To assess peripheral nerve and muscle function, differentiate between neuropathic and myopathic patterns, and evaluate for conditions like Guillain-Barré syndrome or myositis.</p> <p>6. <b>**Muscle Biopsy:**</b><br/>- Considered if there is suspicion of myositis or a specific muscle pathology that cannot be clarified with the above tests.</p> <p><b>### Differential Diagnoses:</b></p> <p>1. <b>**Immune-mediated Myositis:**</b><br/>- Inflammation of the muscles, which can be a direct effect of immunotherapy. Symptoms typically include proximal muscle weakness and may be associated with elevated muscle enzymes like CK.</p> <p>2. <b>**Guillain-Barré Syndrome (GBS):**</b><br/>- An acute immune-mediated polyneuropathy, potentially triggered by immunotherapy, presenting as ascending weakness, which can be rapid in progression.</p> <p>3. <b>**Myasthenia Gravis (MG):**</b><br/>- An autoimmune disorder characterized by muscle weakness, which can be exacerbated or unmasked by immunotherapy.</p> <p>4. <b>**Central Nervous System (CNS) irAEs:**</b><br/>- Conditions such as encephalitis, transverse myelitis, or demyelinating disorders, although rare, can be associated with immunotherapy.</p> <p>5. <b>**CNS Metastasis:**</b><br/>- Metastatic lesions to the brain or spinal cord from melanoma could cause neurological deficits, including weakness.</p> <p>6. <b>**Infectious Causes:**</b><br/>- Considering the immunosuppressive effect of the treatment, opportunistic infections affecting the CNS or peripheral nervous system need to be ruled out.</p> | <p>4. <b>**Natriuretic Peptides (BNP or NT-proBNP):**</b><br/>- As markers of cardiac stress and heart failure, which can be elevated in myocarditis or other forms of cardiac injury.</p> <p>5. <b>**Cardiac Magnetic Resonance Imaging (Cardiac MRI):**</b><br/>- Considered the gold standard for diagnosing myocarditis, as it can provide detailed information about myocardial inflammation, edema, and fibrosis.</p> <p>6. <b>**Additional Biomarkers:**</b><br/>- Consider testing for other cardiac biomarkers, including CK-MB and LDH, which might be elevated in myocardial injury.</p> <p>7. <b>**Coronary Angiography:**</b><br/>- Depending on the clinical presentation and findings from non-invasive tests, coronary angiography might be necessary to rule out ischemic heart disease as a cause of elevated troponins and chest pain.</p> <p>8. <b>**Consultations:**</b><br/>- Early involvement of a cardiologist is crucial for guiding further diagnostic evaluation and management.<br/>- Consider consulting rheumatology or immunology for additional insights into the management of potential irAEs.</p> <p><b>### Differential Diagnoses to Consider:</b></p> <p>- <b>**Immune Checkpoint Inhibitor-Associated Myocarditis:**</b> A rare but serious irAE associated with CTLA-4 and PD-1 inhibitors, presenting with symptoms like chest pain, arrhythmias, and elevated cardiac biomarkers.<br/>- <b>**Acute Coronary Syndrome (ACS):**</b> Given the patient's age and presentation with chest pain and elevated troponins, ACS needs to be considered and ruled out.<br/>- <b>**Pericarditis:**</b> Inflammation of the pericardium, which can present with chest pain and potentially elevated troponins if associated with myocardial involvement.<br/>- <b>**Arrhythmias:**</b> The sensation of fluttering in the chest could indicate an</p> | <p>3. <b>**High-dose Corticosteroids:**</b><br/>- Initiate high-dose intravenous corticosteroids, such as methylprednisolone, to reduce inflammation. This is the first-line treatment for severe irAEs, especially for conditions like myocarditis.</p> <p>4. <b>**Cardiology and Rheumatology Consultations:**</b><br/>- Involve cardiology for the management of heart block and any other arrhythmias or cardiac complications. A rheumatologist or an immunologist experienced in managing irAEs can also provide valuable input, especially regarding immunosuppressive therapy.</p> <p>5. <b>**Additional Immunosuppression:**</b><br/>- If there is no improvement or if the patient's condition worsens despite corticosteroid treatment, additional immunosuppressive agents such as mycophenolate mofetil or tacrolimus may be considered. Infliximab is typically avoided in cases of myocarditis due to the potential for worsening heart failure.</p> <p>6. <b>**Management of Heart Block:**</b><br/>- Temporary pacing may be required if the heart block leads to significant hemodynamic instability or symptomatic bradycardia.</p> <p>7. <b>**Monitoring and Supportive Care:**</b><br/>- Continuous cardiac monitoring for arrhythmias.<br/>- Supportive care for heart failure symptoms if present.<br/>- Monitoring for potential complications of high-dose corticosteroid therapy.</p> <p>8. <b>**Reassessment:**</b><br/>- Frequent reassessment of cardiac function, including repeat EKGs, cardiac biomarkers, and possibly advanced cardiac imaging like cardiac MRI, which can provide more definitive evidence of myocarditis.</p> <p>9. <b>**Patient Education:**</b><br/>- Educate the patient and family about the signs and symptoms of worsening myocarditis and the importance of immediate medical attention.</p> |  |  |
|-----------------------------------------------------------------------------------------------------------------------------------------------------------------------------------------------------------------------------------------------------------------------------------------------------------------------------------------------------------------------------------------------------------------------------------------------------------------------------------------------------------------------------------------------------------------------------------------------------------------------------------------------------------------------------------------------------------------------------------------------------------------------------------------------------------------------------------------------------------------------------------------------------------------------------------------------------------------------------------------------------------------------------------------------------------------------------------------------------------------------------------------------------------------------------------------------------------------------------------------------------------------------------------------------------------------------------------------------------------------------------------------------------------------------------------------------------------------------------------------------------------------------------------------------------------------------------------------------------------------------------------------------------------------------------------------------------------------------------------------------------------------|--------------------------------------------------------------------------------------------------------------------------------------------------------------------------------------------------------------------------------------------------------------------------------------------------------------------------------------------------------------------------------------------------------------------------------------------------------------------------------------------------------------------------------------------------------------------------------------------------------------------------------------------------------------------------------------------------------------------------------------------------------------------------------------------------------------------------------------------------------------------------------------------------------------------------------------------------------------------------------------------------------------------------------------------------------------------------------------------------------------------------------------------------------------------------------------------------------------------------------------------------------------------------------------------------------------------------------------------------------------------------------------------------------------------------------------------------------------------------------------------------------------------------------------------------------------------------------------------------------------------------------------------------------------------------------------------------------------------------------------------------------------------------------------|-------------------------------------------------------------------------------------------------------------------------------------------------------------------------------------------------------------------------------------------------------------------------------------------------------------------------------------------------------------------------------------------------------------------------------------------------------------------------------------------------------------------------------------------------------------------------------------------------------------------------------------------------------------------------------------------------------------------------------------------------------------------------------------------------------------------------------------------------------------------------------------------------------------------------------------------------------------------------------------------------------------------------------------------------------------------------------------------------------------------------------------------------------------------------------------------------------------------------------------------------------------------------------------------------------------------------------------------------------------------------------------------------------------------------------------------------------------------------------------------------------------------------------------------------------------------------------------------------------------------------------------------------------------------------------------------------------------------------------------------------------------------------------------------------------------------------------------------------------------------------------------|---------------------------------------------------------------------------------------------------------------------------------------------------------------------------------------------------------------------------------------------------------------------------------------------------------------------------------------------------------------------------------------------------------------------------------------------------------------------------------------------------------------------------------------------------------------------------------------------------------------------------------------------------------------------------------------------------------------------------------------------------------------------------------------------------------------------------------------------------------------------------------------------------------------------------------------------------------------------------------------------------------------------------------------------------------------------------------------------------------------------------------------------------------------------------------------------------------------------------------------------------------------------------------------------------------------------------------------------------------------------------------------------------------------------------------------------------------------------------------------------------------------------------------------------------------------------------------------------------------------------------------------------------------------------------------------------------------------------------------------------------------------------------------------------------------------------------------------------------------|--|--|

|  |                                                                                                                                                                                                                                                                                                                                                                                                                                                                                                                                                                                                                                                                                                                |                                                                                                                                                                                                                                                                                                                                                                                                                                                                                                                                                                                                                                                                                    |                                                                                                                                                                                                                                                                                                                                                                              |                                                                                                                                                                                                                                                                                                                 |  |
|--|----------------------------------------------------------------------------------------------------------------------------------------------------------------------------------------------------------------------------------------------------------------------------------------------------------------------------------------------------------------------------------------------------------------------------------------------------------------------------------------------------------------------------------------------------------------------------------------------------------------------------------------------------------------------------------------------------------------|------------------------------------------------------------------------------------------------------------------------------------------------------------------------------------------------------------------------------------------------------------------------------------------------------------------------------------------------------------------------------------------------------------------------------------------------------------------------------------------------------------------------------------------------------------------------------------------------------------------------------------------------------------------------------------|------------------------------------------------------------------------------------------------------------------------------------------------------------------------------------------------------------------------------------------------------------------------------------------------------------------------------------------------------------------------------|-----------------------------------------------------------------------------------------------------------------------------------------------------------------------------------------------------------------------------------------------------------------------------------------------------------------|--|
|  | <p>the patient's airway protection or if there is significant alteration in consciousness.</p> <p>8. <b>**Long-term Considerations:**</b><br/>- Discuss the long-term implications of this irAE on the continuation of pembrolizumab therapy with the patient and the oncology team. In many cases, rechallenge with the same agent that caused a severe irAE, particularly neurologic, is not recommended.</p> <p>The management of immune-mediated encephalitis is complex and requires an interdisciplinary approach, ensuring the patient receives both appropriate acute care and consideration for the long-term management of their underlying cancer and potential long-term sequelae of the irAE.</p> | <p>7. <b>**Paraneoplastic Syndromes:**</b><br/>- Neurological syndromes associated with cancer, independent of metastasis, can present with various neurological symptoms, including weakness.</p> <p>8. <b>**Electrolyte Imbalances:**</b><br/>- Hypokalemia, hypocalcemia, or other electrolyte disturbances can lead to muscle weakness and should be considered.</p> <p>Given the timing after immunotherapy initiation and the potential for serious irAEs, prompt and thorough diagnostic evaluation is crucial. In parallel, close communication with the patient's oncology team is essential to manage the immunotherapy regimen appropriately based on the findings.</p> | <p>arrhythmic event, necessitating ECG monitoring.</p> <p>Given the seriousness of potential cardiac irAEs, prompt evaluation and management are essential, often requiring hospitalization for close monitoring, cardiac imaging, and potentially empiric treatment for myocarditis, including high-dose corticosteroids, while awaiting definitive diagnostic results.</p> | <p>The management of immune-related myocarditis requires a multidisciplinary approach with close collaboration between oncology, cardiology, and potentially other specialties. It's crucial to recognize and treat this condition promptly due to its potential for rapid progression and severe outcomes.</p> |  |
|--|----------------------------------------------------------------------------------------------------------------------------------------------------------------------------------------------------------------------------------------------------------------------------------------------------------------------------------------------------------------------------------------------------------------------------------------------------------------------------------------------------------------------------------------------------------------------------------------------------------------------------------------------------------------------------------------------------------------|------------------------------------------------------------------------------------------------------------------------------------------------------------------------------------------------------------------------------------------------------------------------------------------------------------------------------------------------------------------------------------------------------------------------------------------------------------------------------------------------------------------------------------------------------------------------------------------------------------------------------------------------------------------------------------|------------------------------------------------------------------------------------------------------------------------------------------------------------------------------------------------------------------------------------------------------------------------------------------------------------------------------------------------------------------------------|-----------------------------------------------------------------------------------------------------------------------------------------------------------------------------------------------------------------------------------------------------------------------------------------------------------------|--|
